# Supplementary material for: Rare-earth metal complexes bearing electrophilic and nucleophilic carbon centres and their unique reactivity patterns towards pyridine derivatives
Source: PubMed Central journal article supplement — Chem Sci. 2024 Nov 12;15(48):20315–27. doi: 10.1039/d4sc04197f (PMC11575488; doi:10.1039/d4sc04197f), 2024-11-12
Supplement: SC-OLF-D4SC04197F-s001.pdf [file SC-OLF-D4SC04197F-s001.pdf]

Electronic Supplementary Material (ESI) for Chemical Science.  
This journal is © The Royal Society of Chemistry 2024

## **Rare-earth metal complexes bearing electrophilic and nucleophilic carbon centres and their unique reactivity patterns towards pyridine derivatives**

Weikang Wu,<sup>a</sup> Thayalan Rajeshkumar,<sup>d</sup> Shan Zhu,<sup>a</sup> Fuxiang Chai,<sup>a</sup> Dongjing Hong,<sup>a</sup> Zeming Huang,<sup>b</sup> Qingbing Yuan,<sup>a</sup> Laurent Maron,<sup>\*d</sup> Shaowu Wang<sup>\*bc</sup>

<sup>a</sup>Key Laboratory of Functional Molecular Solids, Ministry of Education, Anhui Laboratory of Molecule-Based Materials, College of Chemistry and Materials Science, Anhui Normal University, Wuhu 241000, Anhui, P. R. China.

E-mail: [swwang@mail.ahnu.edu.cn](mailto:swwang@mail.ahnu.edu.cn)

<sup>b</sup>Anhui Laboratory of Clean Catalytic Engineering, Anhui Laboratory of Functional Coordinated Complexes for Materials Chemistry and Application, College of Chemical and Environmental Engineering, Anhui Polytechnic University, Wuhu 241000, Anhui, P. R. China.

E-mail: [wsw@ahpu.edu.cn](mailto:wsw@ahpu.edu.cn)

<sup>c</sup>State Key Laboratory of Organometallic Chemistry, Shanghai Institute of Organic Chemistry, Chinese Academy of Sciences, Shanghai 200032, P. R. China.

<sup>d</sup>LPCNO, CNRS & INSA, Université Paul Sabatier, 135 Avenue de Rangueil, 31077 Toulouse, France.

E-mail: [laurent.maron@irsamc.ups-tlse.fr](mailto:laurent.maron@irsamc.ups-tlse.fr)

### **Table of Contents**

|                                                                                                                              |     |
|------------------------------------------------------------------------------------------------------------------------------|-----|
| 1. General Reaction Methods.....                                                                                             | 1   |
| 2. Synthesis of Ligands and Complexes .....                                                                                  | 1   |
| 3. <sup>1</sup> H, <sup>13</sup> C { <sup>1</sup> H}, 2D HSQC, and <sup>89</sup> Y NMR Spectra of Ligands and Complexes..... | 14  |
| 4. DFT Calculations .....                                                                                                    | 40  |
| 5. Olex2 Drawing of Complexes.....                                                                                           | 133 |
| 6. Electron Paramagnetic Resonance and UV/vis Absorption Spectra .....                                                       | 154 |
| 7. GC-MS.....                                                                                                                | 155 |
| 8. Tables of Crystal Data and Structure Refinement .....                                                                     | 155 |
| 9. IR Spectra.....                                                                                                           | 163 |
| 10. References.....                                                                                                          | 170 |

## 1. General Reaction Methods

**Materials and Methods.** All syntheses and manipulations of air- and moisture-sensitive materials were performed under dry argon and oxygen-free atmosphere, using standard Schlenk techniques or in a glovebox unless otherwise stated. All solvents were refluxed and distilled over sodium benzophenone ketyl under argon prior to use unless otherwise noted.  $\text{RECl}_3$ ,<sup>1</sup>  $\text{LiCH}_2\text{SiMe}_3$ ,<sup>2</sup>  $\text{RE}(\text{CH}_2\text{SiMe}_3)_3(\text{THF})_2$  (RE = Lu, Yb, Er, Y, Dy, Gd)<sup>3</sup> were prepared according to the literature methods. All other chemicals were commercially available and used as received unless otherwise specified. Elemental analyses data were obtained on an Elemental Model Vario EL III automatic elemental analyzer.  $^1\text{H}$  NMR, and  $^{13}\text{C}\{^1\text{H}\}$  NMR spectra for analyses of compounds were recorded on a Bruker Model AV-500 NMR spectrometer (500 MHz for  $^1\text{H}$ ; 125 MHz for  $^{13}\text{C}\{^1\text{H}\}$ ) in  $\text{C}_6\text{D}_6$  or  $\text{THF}-d_8$  for lanthanide complexes and in  $\text{CDCl}_3$  for organic compounds. Chemical shifts ( $\delta$ ) were reported in ppm.  $J$  values are reported in Hz. IR spectra were recorded on a Shimadzu Model FTIR-8400s or Bruker OPTIK GmbH spectrometer (KBr pellet). HRMS measurements were conducted with an Agilent Model 6220 ESI-TOF mass spectrometer.

### Single Crystal X-ray Crystallographic and refinements.

**Data Collection:** Data collection was performed at 300 K on Bruker D8 Venture diffractometer (S1 and S2) and Bruker SMART APEX II diffractometer (complexes) with a CCD area detector, using graphite monochromated Mo  $K_\alpha$  radiation ( $\lambda = 0.71073 \text{ \AA}$ ).

**Data Reduction:** The determination of the crystal class and unit cell parameters was carried out by the SMART program package.<sup>4</sup> The raw frame data were processed using SAINT<sup>5</sup> and absorption corrections using SADABS<sup>6</sup> to yield the reflection data file.

**Structure Solution:** The structures were solved by using structure program ShelXT with Intrinsic Phasing method<sup>7</sup> in the OLEX2 software.<sup>8</sup>

**Structure Refinement:** Refinements were performed on  $F^2$  anisotropically for all the non-hydrogen atoms by the full-matrix least-squares method using SHELXL program in OLEX2 software.<sup>8</sup>

**CCDC numbers:** 2278697(**1a**), 2278699(**1b**), 2278698(**1c**), 2278700(**1e**), 2278701(**1d**), 2348805(**2a**), 2348806(**2b**), 2348807(**2c**), 2348808(**2d**), 2348809(**2e**), 2348810(**3a**), 2348811(**3b**), 2348812(**3c**), 2348813(**3d**), 2348814(**3e**), 2348816(**4a**), 2348817(**4b**), 2348818(**4c**), 2348819(**4d**), 2348820(**5a**), 2348821(**5b**), 2348822(**5c**), 2348823(**5d**), 2348824(**6a**), 2348825(**6b**), 2348826(**6c**), 2348827(**6d**), 2348828(**7a**), 2348829(**7b**), 2348830(**10b**), 2348831(**10a**), 2348832(**10c**), 2348833(**11**), 2348834(**8a**), 2348835(**8b**), 2348836(**9**), 2348837(**12a**), 2348838(**12b**), 2348839(**12c**), 2348840(**12d**), 2348841(**13**), 2348842(**14a**), 2348843(**14b**), 2348844(**14c**).

## 2. Synthesis of Ligands and Complexes

**Synthesis of 1H-3-(2,6-*i*-Pr<sub>2</sub>C<sub>6</sub>H<sub>3</sub>N=CH)-C<sub>8</sub>H<sub>5</sub>N (S1).** According to the literature,<sup>9</sup> to a 500 mL flask was added 2,6-diisopropylphenylaniline (21.27 g, 22.7 mL, 120 mmol), 1H-indole-3-carbaldehyde (14.52 g, 100 mmol), 150 mL EtOH and catalytic amount of TsOH·H<sub>2</sub>O. Then the mixture was reflux overnight. The yellow suspensions were gradually transferred to dark-red with large amount white salt-like crystals precipitated. The reaction process was monitored by TLC (PE/EA = 1/1, v/v, PE = petroleum ether, EA = ethyl acetate, R<sub>f</sub> = 0.42). The mixture was allowed to be cooled to ambient temperature and filtered, and the filter cake was washed with ice-cold EtOH (150 mL × 3) followed petroleum ether (150 mL × 3). The volatiles were removed under reduced pressure to give the product **S1** as a white salt-like crystalline solid (30.14 g) in 99% yield. M.P.: 240 °C. IR (KBr pellets, cm<sup>-1</sup>):  $\nu$  3228(m), 3063(w), 2958(m), 2923(m), 2863(w), 1683(w), 1621(s), 1580(m), 1525(w), 1456(m), 1425(s), 1361(m), 1317(w), 1245(m), 1173(w), 1105(w), 1046(w),

1008(w), 972(w), 932(w), 883(w), 851(m), 795(w), 744(m).  $^1\text{H}$  NMR (500 MHz,  $\text{CDCl}_3$ , ppm, 298 K):  $\delta$  8.54 (d,  $J = 7.5$  Hz, 1H), 8.47 (s, 1H, -NH-), 8.36 (s, 1H, -CH=N-), 7.61 (s, 1H, - $\text{C}_{2\text{-indolyl}}\text{H}$ ), 7.45 (d,  $J = 10.0$  Hz, 1H), 7.35-7.28 (m, 2H), 7.18-7.16 (m, 2H), 7.11-7.08 (m, 1H), 3.13 (hept,  $J = 5.0$  Hz, 2H, - $\text{CH}(\text{CH}_3)_2$ ), 1.18 (d,  $J = 5.0$  Hz, 12H, - $\text{CH}(\text{CH}_3)_2$ ).  $^{13}\text{C}\{^1\text{H}\}$  NMR (125 MHz,  $\text{CDCl}_3$ , ppm, 298 K):  $\delta$  156.3 (-CH=N-), 150.9 (2-indolyl- $\text{C}_{\text{sp}2}$ ), 138.5, 137.2, 130.1, 125.8, 124.1, 123.9, 123.3, 122.9, 122.2, 116.8, 111.7, 28.3, 24.0. HR-MS (APCI)  $m/z$  calcd. for  $\text{C}_{21}\text{H}_{25}\text{N}_2$  ( $\text{M}+\text{H}^+$ ): 305.2012, found: 305.2019.

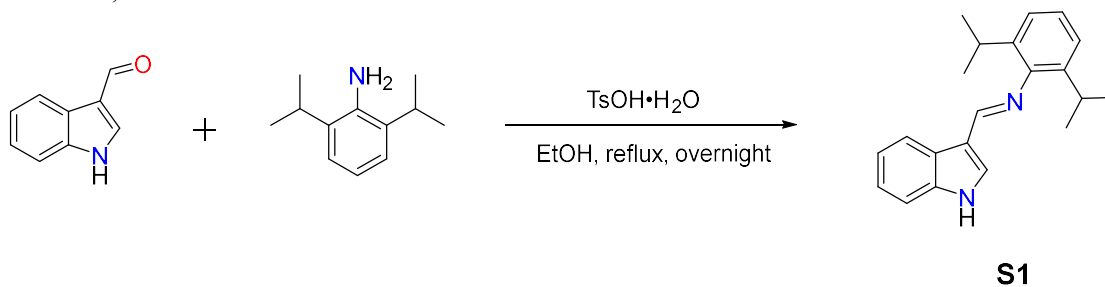

**Scheme S1.** Synthesis of S1.

**Synthesis of [1-(2- $\text{C}_5\text{H}_{10}\text{NCH}_2\text{CH}_2$ )-3-(2,6- $i\text{Pr}_2\text{C}_6\text{H}_3\text{N}=\text{CH}$ )- $\text{C}_8\text{H}_5\text{N}$ ] ( $\text{HL}^1$ ).** According to the literature,<sup>10</sup> anhydrous  $\text{K}_2\text{CO}_3$  (13.8 g, 100 mmol) and S1 (15 g, 50 mmol) were added to a 500 mL flask, followed by addition of 125 mL anhydrous *N,N*-dimethylformamide as a solvent. The mixture was stirred at room temperature for 30 min. Then 1-(2-chloroethyl) piperidine hydrochloride (11.25 g, 60 mmol) was added and the mixture was reacted overnight at room temperature. With the progress of the reaction, the light-yellow suspension solution gradually turns into light pink emulsion. The reaction process was monitored by TLC (PE/EA = 3/1, v/v, PE = petroleum ether, EA = ethyl acetate,  $R_f = 0.60$ ). When the reaction finished, it was gradually diluted with 200 mL of water and extracted with ethyl acetate (100 mL  $\times$  3). The combined organic phase was washed with brine (100 mL  $\times$  3) and dried over anhydrous  $\text{MgSO}_4$ . The  $\text{MgSO}_4$  was filtered and the solvent of the filtrate was evaporated under reduced pressure on a rotary evaporator to obtain  $\text{HL}^1$  as a yellow solid which was recrystallized from a mixture of ethyl acetate and petroleum ether to afford a light yellow crystalline solid (19.7 g) in 95% yield. M.P.: 80 °C. IR (KBr pellets,  $\text{cm}^{-1}$ ):  $\nu$  3119(m), 3052(w), 2957(m), 2932(m), 2862(w), 2369(w), 1622(s), 1589(m), 1572(m), 1535(w), 1468(m), 1441(s), 1395(m), 1352(w), 1165(m), 1034(m), 854(w), 789(w), 743(m).  $^1\text{H}$  NMR (500 MHz,  $\text{CDCl}_3$ , ppm, 298 K):  $\delta$  8.49 (d,  $J = 5.0$  Hz, 1H), 8.32 (s, 1H, -CH=N-), 7.58 (s, 1H, - $\text{C}_{2\text{-indolyl}}\text{H}$ ), 7.41 (d,  $J = 10.0$  Hz, 1H), 7.35-7.31 (m, 1H), 7.29-7.26 (m, 1H), 7.16-7.15 (m, 2H), 7.09-7.06 (m, 1H), 4.28 (t,  $J = 7.5$  Hz, 2H, - $\text{CH}_2$ -), 3.13 (hept,  $J = 7.5$  Hz, 2H, - $\text{CH}(\text{CH}_3)_2$ ), 2.76 (t,  $J = 7.5$  Hz, 2H, - $\text{CH}_2$ -), 2.49-2.46 (m, 4H, - $\text{CH}_2$ -), 1.62-1.58 (m, 4H, - $\text{CH}_2$ -), 1.48-1.44 (m, 2H, - $\text{CH}_2$ -), 1.18 (d,  $J = 5.0$  Hz, 12H, - $\text{CH}(\text{CH}_3)_2$ ).  $^{13}\text{C}\{^1\text{H}\}$  NMR (125 MHz,  $\text{CDCl}_3$ , ppm, 298 K):  $\delta$  155.7 (-CH=N-), 150.7 (2-indolyl- $\text{C}_{\text{sp}2}$ ), 138.2, 137.2, 133.6, 126.2, 123.4, 123.2, 122.9, 122.6, 121.5, 114.8, 109.6, 58.4, 54.9, 44.6, 27.9, 26.0, 24.2, 23.6. HR-MS(APCI)  $m/z$  calcd. for  $\text{C}_{28}\text{H}_{38}\text{N}_3$  ( $\text{M}+\text{H}^+$ ): 416.3060, found: 416.3056.

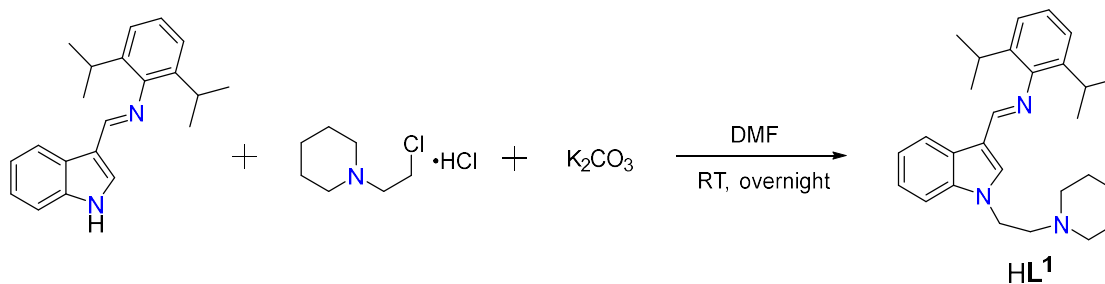

**Scheme S2.** Synthesis of  $\text{HL}^1$ .

**Synthesis of [1-(2-C<sub>5</sub>H<sub>10</sub>NCH<sub>2</sub>CH<sub>2</sub>)-3-(CHO)-C<sub>8</sub>H<sub>5</sub>N] (S2).** To a 500 mL flask was added 1*H* indole-3-carbaldehyde (7.25 g, 50 mmol), Anhydrous K<sub>2</sub>CO<sub>3</sub> (13.8 g, 100 mmol) and 125 mL anhydrous DMF. The mixture was stirred at room temperature for 30 min. Then 1-(2-chloroethyl) piperidine hydrochloride (11.25 g, 60 mmol) was added and the mixture was reacted overnight at room temperature. The reaction process was monitored by TLC. When the reaction finished, it was gradually diluted with 200 mL of water and extracted with ethyl acetate (100 mL × 3). The combined organic phase was washed with brine (100 mL × 3) and dried over anhydrous MgSO<sub>4</sub>. The MgSO<sub>4</sub> was filtered and the solvent of the filtrate was evaporated under reduced pressure on a rotary evaporator to obtain **S2** as a yellow solid which was recrystallized with ethyl acetate and petroleum ether to afford a light yellow crystalline solid (12.2 g) in 95% yield. M.P.: 65-72 °C. IR (KBr pellets, cm<sup>-1</sup>): ν 3285, 3076, 3016, 2930, 2855, 2779, 2359, 1651, 1531, 1470, 1402, 1389, 1182, 1059, 777, 746. <sup>1</sup>H NMR (500 MHz, CDCl<sub>3</sub>, ppm, 298 K): δ 10.01 (s, 1H, -CHO), 8.30 (d, *J* = 10.0 Hz, 1H, 4-indole-*H*), 7.82 (s, 1H, indole-NCH), 7.38-7.28 (m, 3H, Ph-*H*), 4.26 (t, *J* = 5.0 Hz, 2H), 2.74 (t, *J* = 5.0 Hz, 2H), 2.44 (t, *J* = 5.0 Hz, 4H), 1.58 (quint, *J* = 5.0 Hz, 4H), 1.45 (m, 2H). <sup>13</sup>C {<sup>1</sup>H} NMR (125 MHz, CDCl<sub>3</sub>, ppm, 298 K): δ 185.0 (-CHO), 138.6, 137.7, 125.7, 124.3, 123.3, 122.6, 118.5, 110.3, 58.4, 55.2, 45.2, 26.3, 24.5. HR-MS(ESI) *m/z* calcd. for C<sub>16</sub>H<sub>21</sub>N<sub>2</sub>O(M+H<sup>+</sup>): 257.1648, found: 257.1646.

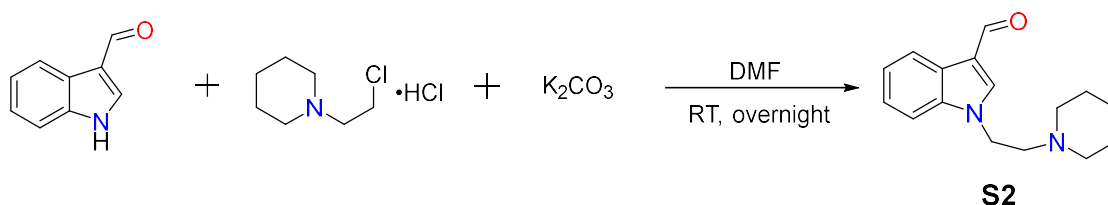

**Scheme S3.** Synthesis of **S2**.

**Synthesis of [1-(2-C<sub>5</sub>H<sub>10</sub>NCH<sub>2</sub>CH<sub>2</sub>)-3-(C<sub>10</sub>H<sub>15</sub>N=CH)-C<sub>8</sub>H<sub>5</sub>N] (HL<sup>2</sup>).** To a 500 mL flask was added 2,6-diisopropylphenylaniline (8.51 g, 9.1 mL, 48 mmol), **S2** (10.2 g, 40 mmol), 100 mL EtOH and catalytic amount of TsOH·H<sub>2</sub>O. Then the mixture was reflux for three days. After the reaction was completed and cooled to room temperature, the solvent was removed by rotary evaporation and a large amount of petroleum ether was added to continuously precipitate white powder. After filtration, the desired product **HL<sup>2</sup>** was obtained (14.0 g) in 90% yield. M.P.: 62-65 °C. IR (KBr pellets, cm<sup>-1</sup>): ν 3128, 3072, 2976, 2892, 2845, 2402, 1645, 1605, 1589, 1552, 1486, 1467, 1402, 1387, 1235, 1088, 872, 768, 752. <sup>1</sup>H NMR (400 MHz, CDCl<sub>3</sub>, ppm, 298 K): δ 8.52 (s, 1H, -CH=N-), 8.36 (d, *J* = 8.0 Hz, 2H, 4-indole-*H*), 7.47 (s, indole-NCH, 1H), 7.35-7.18 (m, 3H), 4.24 (t, *J* = 8.0 Hz, 2H), 2.70 (t, *J* = 6.0 Hz, 2H), 2.45 (s, 4H), 2.17 (s, 3H), 1.84 (d, *J* = 8.0 Hz, 6H), 1.76-1.69 (m, 6H), 1.59 (quint, *J* = 4.0 Hz, 4H), 1.47-1.43 (m, 2H). <sup>13</sup>C {<sup>1</sup>H} NMR (100 MHz, CDCl<sub>3</sub>, ppm, 298 K): δ 148.9, 137.0, 130.8, 126.5, 122.5, 121.8, 120.8, 115.2, 109.3, 58.6, 56.9, 54.9, 44.4, 43.5, 36.8, 29.8, 26.0, 24.2. HR-MS(ESI) *m/z* calcd. for C<sub>26</sub>H<sub>26</sub>N<sub>3</sub>(M+H<sup>+</sup>): 390.2909, found: 390.2900.

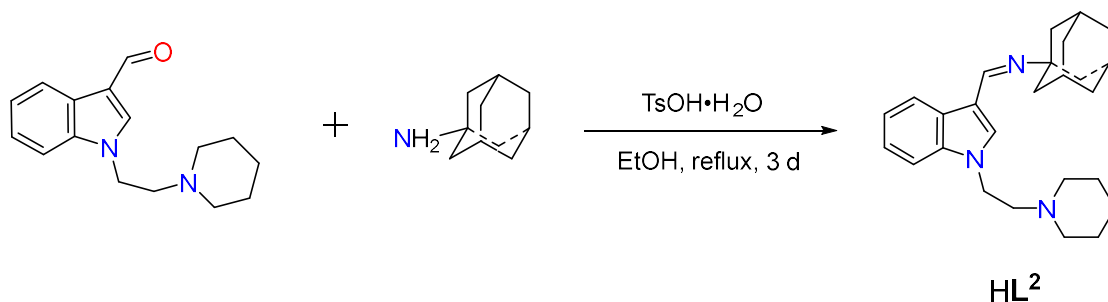

**Scheme S4.** Synthesis of **HL<sup>2</sup>**.

**Preparation of ( $\kappa^2$ -L<sup>1</sup>)Lu(CH<sub>2</sub>SiMe<sub>3</sub>)<sub>2</sub>(THF)<sub>2</sub> (1a).**<sup>10</sup> To a mixture of HL<sup>1</sup> (207 mg, 0.5 mmol) and Lu(CH<sub>2</sub>SiMe<sub>3</sub>)<sub>3</sub>(THF)<sub>2</sub> (0.5 mmol, 310 mg) was added 3 mL tetrahydrofuran, the resulted mixture was allowed to be stirred at room temperature for 2 h. After the reaction was completed, the solvent was evaporated under reduced pressure. The residue was extracted with a mixture of *n*-hexane (10 mL) and THF (0.2 mL). Light yellow crystals were obtained at 0 °C by standing the extraction for several days (295 mg, 85%). M.P. (sealed): 126 °C (Dec.) under Ar. IR (KBr pellet, cm<sup>-1</sup>):  $\nu$  3060(w), 3042(m), 2963(s), 2892(s), 2816(m), 2326(w), 1608(s), 1582(m), 1560(m), 1510(m), 1420(m), 1425(m), 1380(m), 1326(m), 1143(m), 1020(m), 886(s), 753(s), 743(s). <sup>1</sup>H NMR (500 MHz, C<sub>6</sub>D<sub>6</sub>, ppm, 298 K):  $\delta$  8.54 (s, 1H, -CH=N-), 7.54-7.52 (m, 1H), 7.33-7.31 (m, 1H), 7.20-7.19 (m, 2H), 7.11-7.10 (m, 3H), 4.36 (br, 2H, -CH<sub>2</sub>-), 3.59-3.56 (m, 8H, THF), 3.40-3.37 (m, 2H, -CH(CH<sub>3</sub>)<sub>2</sub>), 3.02-3.00 (m, 2H, -CH<sub>2</sub>-), 2.65 (br, 4H, -CH<sub>2</sub>-), 1.41 (br, 4H, -CH<sub>2</sub>-), 1.31-1.30 (m, 8H, -CH(CH<sub>3</sub>)<sub>2</sub> & -CH<sub>2</sub>-), 1.29-1.28 (m, 8H, THF), 1.10-1.09 (m, 6H, -CH(CH<sub>3</sub>)<sub>2</sub>), 0.27 (s, 18H, -Si(CH<sub>3</sub>)<sub>3</sub>), -0.33 (s, 4H, -CH<sub>2</sub>Si(CH<sub>3</sub>)<sub>3</sub>). <sup>13</sup>C{<sup>1</sup>H} NMR (125 MHz, C<sub>6</sub>D<sub>6</sub>, ppm, 298 K):  $\delta$  214.2 (s, 2-indolyl-C<sub>sp2</sub>), 169.2 (imine C), 156.2, 148.4, 142.3, 141.6, 138.4, 129.8, 126.3, 123.9, 123.3, 121.9, 121.7, 116.9, 111.2, 68.9, 58.3, 54.9, 53.3, 48.5, 47.7, 44.5, 28.9, 28.6, 28.4, 26.0, 25.4, 24.4, 23.8, 22.8, 4.6 (s, -Si(CH<sub>3</sub>)<sub>3</sub>). Anal. Calcd for C<sub>44</sub>H<sub>74</sub>LuN<sub>3</sub>O<sub>2</sub>Si<sub>2</sub>: C, 58.19; H, 8.21; N, 4.63. Found: C, 58.23; H, 8.46; N, 4.50.

**Preparation of ( $\kappa^2$ -L<sup>1</sup>)Yb(CH<sub>2</sub>SiMe<sub>3</sub>)<sub>2</sub>(THF)<sub>2</sub> (1b).**<sup>10</sup> A similar procedure to that for the preparation of complex **1a** was used. Red crystals were obtained at 0 °C by standing the extraction for several days (235 mg, 78%). M.P. (sealed): 123 °C (Dec.) under Ar. IR (KBr pellet, cm<sup>-1</sup>):  $\nu$  3065(w), 3047(m), 2953(s), 2915(s), 2834(m), 2330(w), 1605(s), 1574(m), 1566(m), 1506(m), 1433(m), 1425(m), 1388(m), 1345(m), 1159(m), 1022(m), 846(s), 776(s), 737(s). Anal. Calcd for C<sub>44</sub>H<sub>74</sub>YbN<sub>3</sub>O<sub>2</sub>Si<sub>2</sub>: C, 58.31; H, 8.23; N, 4.64. Found: C, 58.23; H, 8.43; N, 4.37.

**Preparation of ( $\kappa^2$ -L<sup>1</sup>)Er(CH<sub>2</sub>SiMe<sub>3</sub>)<sub>2</sub>(THF)<sub>2</sub> (1c).**<sup>10</sup> A similar procedure to that for the preparation of complex **1a** was used. Light yellow crystals were obtained at 0 °C by standing the extraction for several days (324 mg, 79%). M.P. (sealed): 128 °C (Dec.) under Ar. IR (KBr pellet, cm<sup>-1</sup>):  $\nu$  3062(w), 3045(m), 2946(s), 2933(s), 2845(m), 2350(w), 1621(s), 1553(m), 1545(m), 1521(m), 1455(m), 1432(m), 1385(m), 1342(m), 1152(m), 1028(m), 850(s), 763(s), 741(s). Anal. Calcd for C<sub>44</sub>H<sub>74</sub>ErN<sub>3</sub>O<sub>2</sub>Si<sub>2</sub>: C, 58.69; H, 8.28; N, 4.67. Found: C, 58.88; H, 8.52; N, 4.46.

**Preparation of ( $\kappa^2$ -L<sup>1</sup>)Y(CH<sub>2</sub>SiMe<sub>3</sub>)<sub>2</sub>(THF)<sub>2</sub> (1d).**<sup>10</sup> A similar procedure to that for the preparation of complex **1a** was used. Light yellow crystals were obtained at 0 °C by standing the extraction for several days (205 mg, 76%). M.P. (sealed): 132 °C (Dec.) under Ar. IR (KBr pellet, cm<sup>-1</sup>):  $\nu$  3071(w), 3055(m), 2956(s), 2932(s), 2846(m), 2342(w), 1606(s), 1565(m), 1540(m), 1514(m), 1462(m), 1431(m), 1375(m), 1346(m), 1145(m), 1018(m), 834(s), 756(s), 738(s). <sup>1</sup>H NMR (500 MHz, C<sub>6</sub>D<sub>6</sub>, ppm, 298 K):  $\delta$  8.51(s, 1H, -CH=N-), 7.55-7.53 (m, 1H), 7.33-7.31 (m, 1H), 7.20-7.18 (m, 2H), 7.13-7.11 (m, 3H), 4.36 (br, 2H, -CH<sub>2</sub>-), 3.61-3.59 (m, 8H, THF), 3.39-3.34 (m, 2H, -CH(CH<sub>3</sub>)<sub>2</sub>), 2.99-2.96 (m, 2H, -CH<sub>2</sub>-), 2.65-2.63 (m, 4H, -CH<sub>2</sub>-), 1.48-1.43 (m, 4H, -CH<sub>2</sub>-), 1.32-1.31 (m, 8H, -CH(CH<sub>3</sub>)<sub>2</sub> & -CH<sub>2</sub>-), 1.30-1.27 (m, 8H, THF), 1.12-1.11 (m, 6H, -CH(CH<sub>3</sub>)<sub>2</sub>), 0.28 (s, 18H, -Si(CH<sub>3</sub>)<sub>3</sub>), -0.20 (d, *J*<sub>Y-C</sub> = 5.0 Hz, 4H, -CH<sub>2</sub>Si(CH<sub>3</sub>)<sub>3</sub>). <sup>13</sup>C{<sup>1</sup>H} NMR (125 MHz, C<sub>6</sub>D<sub>6</sub>, ppm, 298 K):  $\delta$  204.1 (d, *J*<sub>Y-C</sub> = 43.8 Hz, 2-indolyl-C<sub>sp2</sub>), 168.7 (imine C), 148.5, 142.1, 141.1, 130.2, 129.3, 126.1, 125.7, 123.9, 123.1, 121.7, 121.6, 116.8, 110.9, 69.0, 59.1, 58.3, 56.6, 55.1, 54.9, 53.6, 47.7, 40.8 (d, *J*<sub>Y-C</sub> = 36.3 Hz, -CH<sub>2</sub>Si(CH<sub>3</sub>)<sub>3</sub>), 28.8, 26.4, 26.3, 25.9, 25.5, 24.5, 23.8, 22.9, 21.4, 20.9, 4.5 (s, -Si(CH<sub>3</sub>)<sub>3</sub>). <sup>89</sup>Y NMR (24.5 MHz, C<sub>6</sub>D<sub>6</sub>, ppm, 298 K):  $\delta$  1101.5. Anal. Calcd for C<sub>44</sub>H<sub>74</sub>YN<sub>3</sub>O<sub>2</sub>Si<sub>2</sub>: C, 64.28; H, 9.07; N, 5.11. Found: C, 64.57; H, 9.13; N, 4.87.

**Preparation of ( $\kappa^2$ -L<sup>1</sup>)Dy(CH<sub>2</sub>SiMe<sub>3</sub>)<sub>2</sub>(THF)<sub>2</sub> (1e).**<sup>10</sup> A similar procedure to that for the preparation of complex **1a** was used. Yellow crystals were obtained at 0 °C by standing the

extraction for several days (291 mg, 80%). M.P. (sealed): 139 °C (Dec.) under Ar. IR (KBr pellet,  $\text{cm}^{-1}$ ):  $\nu$  3089(w), 3067(m), 2972(s), 2952(s), 2861(m), 2353(w), 1642(s), 1577(m), 1562(m), 1532(m), 1472(m), 1455(m), 1378(m), 1352(m), 1149(m), 1034(m), 854(s), 761(s), 749(s). Anal. Calcd for  $\text{C}_{44}\text{H}_{74}\text{DyN}_3\text{O}_2\text{Si}_2$ : C, 59.00; H, 8.33; N, 4.69. Found: C, 59.24; H, 8.10; N, 4.32.

**Preparation of  $(\kappa^2\text{-L}^1)_2\text{LuCH}_2\text{SiMe}_3$  (**2a**).** To a mixture of  $\text{HL}^1$  (0.6 mmol, 249 mg) and  $\text{Lu}(\text{CH}_2\text{SiMe}_3)_3(\text{THF})_2$  (0.3 mmol, 182 mg) was added 3 mL toluene, the resulted mixture was allowed to be stirred at room temperature for 2 h. After the reaction was completed, the solvent was evaporated under reduced pressure. The residue was extracted with a mixture of *n*-hexane (10 mL) and THF (0.2 mL). Light yellow crystals were obtained at 0 °C by standing the extraction for several days (213 mg, 65%). M.P. (sealed): 135 °C (Dec.) under Ar. IR (KBr pellet,  $\text{cm}^{-1}$ ):  $\nu$  3060(w), 2958(s), 2935(s), 2863(m), 2804(w), 2379(w), 2352(w), 2316(w), 1629(s), 1539(m), 1464(s), 1438(s), 1390(s), 1358(m), 1326(w), 1248(m), 1165(s), 1125(m), 1105(m), 1041(m), 932(w), 858(s), 788(m), 746(s).  $^1\text{H}$  NMR (500 MHz,  $\text{C}_6\text{D}_6$ , ppm, 298 K):  $\delta$  8.38 (s, 2H,  $-\text{CH}=\text{N}-$ ), 7.29-7.27 (m, 2H), 7.13-7.10 (m, 4H), 6.99-6.95 (m, 6H), 6.74-6.73 (m, 2H), 3.64-3.58 (m, 2H,  $-\text{CH}_2-$ ), 3.52-3.46 (m, 2H,  $-\text{CH}_2-$ ), 2.90-2.85 (m, 2H,  $-\text{CH}(\text{CH}_3)_2$ ), 2.70-2.64 (m, 2H,  $-\text{CH}(\text{CH}_3)_2$ ), 2.42 (t,  $J = 7.5$  Hz, 4H,  $-\text{CH}_2-$ ), 2.09 (br, 8H,  $-\text{CH}_2-$ ), 1.51 (d,  $J = 5.0$  Hz, 6H,  $-\text{CH}(\text{CH}_3)_2$ ), 1.39-1.35 (m, 8H,  $-\text{CH}_2-$ ), 1.17-1.15 (m, 4H,  $-\text{CH}_2-$ ), 1.09 (d,  $J = 5.0$  Hz, 6H,  $-\text{CH}(\text{CH}_3)_2$ ), 0.81 (d,  $J = 5.0$  Hz, 6H,  $-\text{CH}(\text{CH}_3)_2$ ), 0.12 (s, 9H,  $-\text{Si}(\text{CH}_3)_3$ ), 0.11 (d,  $J = 5.0$  Hz, 6H,  $-\text{CH}(\text{CH}_3)_2$ ), -0.08 (q,  $J = 15.0$  Hz, 2H,  $-\text{CH}_2\text{Si}(\text{CH}_3)_3$ ).  $^{13}\text{C}\{^1\text{H}\}$  NMR (125 MHz,  $\text{C}_6\text{D}_6$ , ppm, 298 K):  $\delta$  216.6 (s, 2-indolyl- $\text{C}_{sp2}$ ), 169.3 (imine C), 147.3, 143.1, 141.8, 130.3, 129.4, 128.6, 126.6, 124.3, 123.6, 123.3, 122.0, 121.8, 116.5, 111.5, 58.9, 56.1, 55.2, 48.1, 30.7, 29.0, 26.4, 26.0, 25.6, 24.9, 24.0, 20.9, 4.5 (s,  $-\text{Si}(\text{CH}_3)_3$ ). Anal. Calcd for  $\text{C}_{60}\text{H}_{83}\text{LuN}_6\text{Si}$ : C, 66.03; H, 7.67; N, 7.70. Found: C, 65.77; H, 7.89; N, 7.72.

**Preparation of  $(\kappa^2\text{-L}^1)_2\text{YbCH}_2\text{SiMe}_3$  (**2b**).** A similar procedure to that for the preparation of complex **2a** was used. Red crystals were obtained at 0 °C by standing the extraction for several days (203 mg, 62%). M.P. (sealed): 132 °C (Dec.) under Ar. IR (KBr pellet,  $\text{cm}^{-1}$ ):  $\nu$  3060(w), 2957(s), 2932(s), 2860(m), 2814(w), 2372(w), 2349(w), 2316(w), 1628(s), 1536(m), 1462(s), 1435(s), 1390(s), 1356(m), 1327(w), 1248(m), 1166(s), 1128(m), 1106(m), 1042(m), 932(w), 859(s), 789(m), 745(s). Anal. Calcd for  $\text{C}_{60}\text{H}_{83}\text{YbN}_6\text{Si}$ : C, 66.15; H, 7.68; N, 7.71. Found: C, 66.38; H, 7.98; N, 7.68.

**Preparation of  $(\kappa^2\text{-L}^1)_2\text{ErCH}_2\text{SiMe}_3(\text{THF})$  (**2c**).** A similar procedure to that for the preparation of complex **2a** was used. Yellow crystals were obtained at 0 °C by standing the extraction for several days (250 mg, 72%). M.P. (sealed): 134 °C (Dec.) under Ar. IR (KBr pellet,  $\text{cm}^{-1}$ ):  $\nu$  3061(w), 2958(s), 2934(s), 2858(m), 2804(w), 2371(w), 2349(w), 2315(w), 1626(s), 1535(m), 1461(s), 1435(s), 1390(s), 1355(m), 1324(w), 1246(m), 1165(s), 1129(m), 1106(m), 1041(m), 932(w), 856(s), 785(m), 745(s). Anal. Calcd for  $\text{C}_{64}\text{H}_{91}\text{ErN}_6\text{OSi}$ : C, 66.51; H, 7.94; N, 7.27. Found: C, 66.14; H, 8.13; N, 6.95.

**Preparation of  $(\kappa^2\text{-L}^1)_2\text{YCH}_2\text{SiMe}_3(\text{THF})$  (**2d**).** A similar procedure to that for the preparation of complex **2a** was used. Yellow crystals were obtained at 0 °C by standing the extraction for several days (181 mg, 56%). M.P. (sealed): 132 °C (Dec.) under Ar. IR (KBr pellet,  $\text{cm}^{-1}$ ):  $\nu$  3060(w), 2956(s), 2935(s), 2856(m), 2803(w), 2370(w), 2349(w), 2314(w), 1626(s), 1534(m), 1460(s), 1438(s), 1390(s), 1356(m), 1322(w), 1245(m), 1166(s), 1127(m), 1106(m), 1042(m), 934(w), 858(s), 788(m), 746(s).  $^1\text{H}$  NMR (500 MHz,  $\text{C}_6\text{D}_6$ , ppm, 298 K):  $\delta$  8.51 (s, 2H,  $-\text{CH}=\text{N}-$ ), 7.45-7.43 (m, 2H), 7.29-7.26 (m, 4H), 7.16-7.11 (m, 6H), 6.91-6.90 (m, 2H), 3.77-3.69 (m, 4H,  $-\text{CH}_2-$ ), 3.64 (br, 4H, THF), 3.07-3.01 (m, 2H,  $-\text{CH}(\text{CH}_3)_2$ ), 2.82-2.77 (m, 2H,  $-\text{CH}(\text{CH}_3)_2$ ), 2.59 (t,  $J = 7.5$  Hz, 4H,  $-\text{CH}_2-$ ), 2.26 (br, 8H,  $-\text{CH}_2-$ ), 1.66 (d,  $J = 5.0$  Hz, 6H,  $-\text{CH}(\text{CH}_3)_2$ ), 1.55-1.51 (m, 8H,  $-\text{CH}_2-$ ), 1.42 (br, 4H, THF), 1.34-1.31 (m, 4H,  $-\text{CH}_2-$ ), 1.26 (d,  $J = 5.0$  Hz, 6H,  $-\text{CH}(\text{CH}_3)_2$ ), 0.96 (d,  $J = 5.0$  Hz,

6H, -CH(CH<sub>3</sub>)<sub>2</sub>), 0.29 (s, 9H, -Si(CH<sub>3</sub>)<sub>3</sub>), 0.27 (d, *J* = 5.0 Hz, 6H, -CH(CH<sub>3</sub>)<sub>2</sub>), -0.53 (br, 1H, -CH<sub>2</sub>Si(CH<sub>3</sub>)<sub>3</sub>), -0.75 (br, 1H, -CH<sub>2</sub>Si(CH<sub>3</sub>)<sub>3</sub>). <sup>13</sup>C{<sup>1</sup>H} NMR (125 MHz, C<sub>6</sub>D<sub>6</sub>, ppm, 298 K): δ 205.8 (d, *J*<sub>Y-C</sub> = 50.0 Hz, 2-indolyl-C<sub>sp2</sub>), 168.7 (imine C), 147.1, 143.0, 142.6, 141.2, 130.5, 128.3, 126.4, 124.2, 123.7, 123.1, 121.7, 116.4, 111.2, 68.9, 59.1, 55.1, 50.7 (d, *J*<sub>Y-C</sub> = 37.5 Hz, -CH<sub>2</sub>Si(CH<sub>3</sub>)<sub>3</sub>), 48.3, 30.6, 29.1, 27.0, 26.4, 26.0, 25.8, 25.5, 24.8, 24.1, 21.0, 4.3 (s, -Si(CH<sub>3</sub>)<sub>3</sub>). Anal. Calcd for C<sub>64</sub>H<sub>91</sub>YN<sub>6</sub>Osi: C, 71.34; H, 8.51; N, 7.80. Found: C, 71.44; H, 8.13; N, 7.55.

**Preparation of (κ<sup>2</sup>-L<sup>1</sup>)<sub>2</sub>DyCH<sub>2</sub>SiMe<sub>3</sub>(THF) (2e).** A similar procedure to that for the preparation of complex **2a** was used. Yellow crystals were obtained at 0 °C by standing the extraction for several days (235 mg, 68%). M.P. (sealed): 136 °C (Dec.) under Ar. IR (KBr pellet, cm<sup>-1</sup>): ν 3060(w), 2958(s), 2932(s), 2858(m), 2804(w), 2370(w), 2348(w), 2314(w), 1625(s), 1532(m), 1460(s), 1432(s), 1389(s), 1356(m), 1325(w), 1246(m), 1165(s), 1128(m), 1105(m), 1042(m), 935(w), 857(s), 785(m), 746(s). Anal. Calcd for C<sub>64</sub>H<sub>91</sub>DyN<sub>6</sub>Osi: C, 66.78; H, 7.97; N, 7.30. Found: C, 66.99; H, 7.60; N, 7.47.

**Preparation of (κ<sup>2</sup>-L<sup>2</sup>)<sub>2</sub>YbCH<sub>2</sub>SiMe<sub>3</sub>(THF) (3a).** To a mixture of HL<sup>2</sup> (0.6 mmol, 233 mg) and Yb(CH<sub>2</sub>SiMe<sub>3</sub>)<sub>3</sub>(THF)<sub>2</sub> (0.3 mmol, 183 mg) was added 3 mL toluene, the resulted mixture was allowed to be stirred at room temperature for 2 h. After the reaction was completed, the solvent was evaporated under reduced pressure. The residue was extracted with a mixture of *n*-hexane (10 mL) and THF (0.2 mL). Red crystals were obtained at room temperature by standing the extraction for several days (226 mg, 68%). M.P. (sealed): 126 °C (Dec.) under Ar. IR (KBr pellet, cm<sup>-1</sup>): ν 3051(m), 2905(s), 2847(m), 2808(m), 2674(w), 2314(w), 1635(s), 1573(m), 1537(s), 1463(s), 1388(s), 1346(s), 1307(m), 1247(w), 1176(s), 1124(s), 1095(w), 1036(m), 1005(w), 922(w), 861(s), 811(m), 744(s). Anal. Calcd for C<sub>60</sub>H<sub>87</sub>YbN<sub>6</sub>Osi: C, 64.95; H, 7.90; N, 7.57. Found: C, 64.90; H, 7.62; N, 7.91.

**Preparation of (κ<sup>2</sup>-L<sup>2</sup>)<sub>2</sub>ErCH<sub>2</sub>SiMe<sub>3</sub>(THF) (3b).** A similar procedure to that for the preparation of complex **3a** was used. Yellow crystals were obtained at room temperature by standing the extraction for several days (238 mg, 72%). M.P. (sealed): 128 °C (Dec.) under Ar. IR (KBr pellet, cm<sup>-1</sup>): ν 3050(m), 2906(s), 2845(m), 2807(m), 2672(w), 2314(w), 1636(s), 1572(m), 1537(s), 1463(s), 1389(s), 1345(s), 1306(m), 1246(w), 1175(s), 1126(s), 1098(w), 1035(m), 1003(w), 925(w), 862(s), 810(m), 744(s). Anal. Calcd for C<sub>60</sub>H<sub>87</sub>ErN<sub>6</sub>Osi: C, 65.29; H, 7.95; N, 7.61. Found: C, 65.40; H, 7.63; N, 7.36.

**Preparation of (κ<sup>2</sup>-L<sup>2</sup>)<sub>2</sub>YCH<sub>2</sub>SiMe<sub>3</sub>(THF) (3c).** A similar procedure to that for the preparation of complex **3a** was used. Yellow crystals were obtained at room temperature by standing the extraction for several days (178 mg, 58%). M.P. (sealed): 125 °C (Dec.) under Ar. IR (KBr pellet, cm<sup>-1</sup>): ν 3052(m), 2903(s), 2845(m), 2808(m), 2673(w), 2314(w), 1635(s), 1573(m), 1537(s), 1462(s), 1387(s), 1345(s), 1307(m), 1245(w), 1177(s), 1123(s), 1096(w), 1036(m), 1005(w), 923(w), 862(s), 811(m), 745(s). <sup>1</sup>H NMR (500 MHz, C<sub>6</sub>D<sub>6</sub>, ppm, 298 K): δ 8.89 (s, 2H, -CH=N-), 7.81 (d, *J* = 10.0 Hz, 2H, Ph-*H*), 7.41 (br, 2H), 7.29-7.26 (m, 2H), 7.23-7.22 (m, 2H), 4.89 (br, 1H, -CH<sub>2</sub>-), 4.52 (br, 1H, -CH<sub>2</sub>-), 4.06 (br, 2H, -CH<sub>2</sub>-), 3.72 (br, 4H, THF), 2.96 (br, 4H, -CH<sub>2</sub>-), 2.44 (br, 8H, -CH<sub>2</sub>-), 1.96 (br, 6H), 1.93(br, 12H), 1.42 (br, 4H, THF), 1.39 (br, 12H), 1.29-1.24 (m, 8H, -CH<sub>2</sub>-), 1.3-1.22 (m, 4H, -CH<sub>2</sub>-), 0.18 (s, 9H, -Si(CH<sub>3</sub>)<sub>3</sub>), -0.11 (br, 2H, -CH<sub>2</sub>Si(CH<sub>3</sub>)<sub>3</sub>). <sup>13</sup>C{<sup>1</sup>H} NMR (125 MHz, C<sub>6</sub>D<sub>6</sub>, ppm, 298 K): δ 205.2 (d, *J*<sub>Y-C</sub> = 50.0 Hz, 2-indolyl-C<sub>sp2</sub>), 160.2 (imine C), 140.8, 130.8, 123.4, 120.6, 120.5, 116.5, 110.3, 70.6, 58.0, 55.1 (d, *J*<sub>Y-C</sub> = 37.5 Hz, -CH<sub>2</sub>Si(CH<sub>3</sub>)<sub>3</sub>), 48.1, 44.1, 36.4, 30.1, 26.4, 25.3, 24.7, 4.7 (s, -Si(CH<sub>3</sub>)<sub>3</sub>). <sup>89</sup>Y NMR (24.5 MHz, C<sub>6</sub>D<sub>6</sub>, ppm, 298 K): δ 773.0. Anal. Calcd for C<sub>60</sub>H<sub>87</sub>YN<sub>6</sub>Osi: C, 70.28; H, 8.55; N, 8.20. Found: C, 70.37; H, 8.34; N, 8.02.

**Preparation of (κ<sup>2</sup>-L<sup>2</sup>)<sub>2</sub>DyCH<sub>2</sub>SiMe<sub>3</sub>(THF) (3d).** A similar procedure to that for the preparation of complex **3a** was used. Yellow crystals were obtained at room temperature by standing the

extraction for several days (204 mg, 62%). M.P. (sealed): 128 °C (Dec.) under Ar. IR (KBr pellet,  $\text{cm}^{-1}$ ):  $\nu$  3051(m), 2906(s), 2847(m), 2808(m), 2674(w), 2314(w), 1635(s), 1573(m), 1537(s), 1463(s), 1386(s), 1346(s), 1305(m), 1247(w), 1176(s), 1124(s), 1095(w), 1038(m), 1002(w), 925(w), 863(s), 811(m), 746(s). Anal. Calcd for  $\text{C}_{60}\text{H}_{87}\text{DyN}_6\text{OSi}$ : C, 65.58; H, 7.98; N, 7.65. Found: C, 65.81; H, 7.75; N, 7.56.

**Preparation of  $(\kappa^2\text{-L}^2)_2\text{GdCH}_2\text{SiMe}_3(\text{THF})$  (3e).** A similar procedure to that for the preparation of complex **3a** was used. Yellow crystals were obtained at room temperature by standing the extraction for several days (167 mg, 51%). M.P. (sealed): 129 °C (Dec.) under Ar. IR (KBr pellet,  $\text{cm}^{-1}$ ):  $\nu$  3049(m), 2905(s), 2846(m), 2809(m), 2674(w), 2314(w), 1635(s), 1573(m), 1537(s), 1462(s), 1388(s), 1346(s), 1307(m), 1247(w), 1175(s), 1125(s), 1093(w), 1035(m), 1006(w), 923(w), 861(s), 812(m), 743(s). Anal. Calcd for  $\text{C}_{60}\text{H}_{87}\text{GdN}_6\text{OSi}$ : C, 65.89; H, 8.02; N, 7.68. Found: C, 65.71; H, 7.72; N, 7.69.

**Preparation of 4a.** To a mixture of **1a** (0.15 mmol, 136 mg) and 2-*N,N*-dimethylaminopyridine (0.15 mmol, 18  $\mu\text{L}$ ) was added 3 mL toluene, the resulted mixture was allowed to be stirred at room temperature for 2 h. After the reaction was completed, the solvent was evaporated under reduced pressure. The residue was extracted with a mixture of *n*-hexane (6 mL) and THF (0.2 mL). Yellow crystals were obtained at room temperature by standing the extraction for several days (73 mg, 62%). M.P. (sealed): 179 °C (Dec.) under Ar. IR (KBr pellet,  $\text{cm}^{-1}$ ):  $\nu$  3051(m), 2907(s), 2848(m), 2809(w), 2675(w), 2379(w), 2312(w), 1925(w), 1633(s), 1592(s), 1570(m), 1538(m), 1498(m), 1461(s), 1445(w), 1379(w), 1355(m), 1308(m), 1251(m), 1180(m), 1123(m), 1097(w), 1062(m), 1039(w), 986(m), 922(m), 861(m), 799(m), 741(s).  $^1\text{H}$  NMR (500 MHz,  $\text{THF-}d_8$ , ppm, 298 K):  $\delta$  8.31 (s, 2H,  $-\text{CH}=\text{N}-$ ), 7.29-7.27 (m, 2H, Ph-*H*), 7.25-7.24 (m, 2H, Ph-*H*), 7.03-7.00 (m, 4H, Ph-*H*), 6.95-6.87 (m, 8H, Ph-*H*), 6.48-6.46 (m, 2H, Ph-*H*), 5.68 (d,  $J = 5.0$  Hz, 2H, Py-*H*), 5.58 (t,  $J = 10.0$  Hz, 2H, Py-*H*), 3.87-3.83 (m, 4H,  $-\text{CH}_2-$ ), 3.62-3.60 (m, 8H, THF), 3.31-3.25 (m, 4H,  $-\text{CH}(\text{CH}_3)_2$ ), 2.34-2.30 (m, 8H,  $-\text{CH}_2-$ ), 2.15-2.10 (m, 4H,  $-\text{CH}_2-$ ), 1.98 (s, 6H,  $-\text{NCH}_3$ ), 1.78-1.76 (m, 8H, THF), 1.61-1.58 (m, 8H,  $-\text{CH}_2-$ ), 1.49 (d,  $J = 5.0$  Hz, 12H,  $-\text{CH}(\text{CH}_3)_2$ ), 1.45-1.43 (m, 4H,  $-\text{CH}_2-$ ), 1.16-1.15 (m, 2H,  $-\text{CH-Lu}$ ), 0.84 (d,  $J = 5.0$  Hz, 12H,  $-\text{CH}(\text{CH}_3)_2$ ).  $^{13}\text{C}\{^1\text{H}\}$  NMR (125 MHz,  $\text{THF-}d_8$ , ppm, 298 K):  $\delta$  171.9 (imine C), 161.4, 160.4, 149.9, 144.3, 142.6, 141.3, 139.5, 138.0, 129.8, 125.0, 124.3, 122.3, 120.5, 119.9, 113.8, 108.6, 105.8, 103.7, 100.1, 67.6, 67.3, 55.9, 55.0, 40.4, 32.4, 29.5, 28.3, 26.4, 26.2, 25.8, 25.2, 25.0, 24.9, 24.7, 24.5, 24.4, 24.0. Anal. Calcd for  $\text{C}_{78}\text{H}_{104}\text{Lu}_2\text{N}_{10}\text{O}_2$ : C, 59.91; H, 6.70; N, 8.96. Found: C, 59.73; H, 6.44; N, 8.85.

**Preparation of 4b.** A similar procedure to that for the preparation of complex **4a** was used. Yellow crystals were obtained at room temperature by standing the extraction for several days (80 mg, 68%). M.P. (sealed): 182 °C (Dec.) under Ar. IR (KBr pellet,  $\text{cm}^{-1}$ ):  $\nu$  3050(m), 2908(s), 2848(m), 2809(w), 2675(w), 2378(w), 2312(w), 1926(w), 1632(s), 1592(s), 1570(m), 1538(m), 1497(m), 1461(s), 1446(w), 1379(w), 1355(m), 1308(m), 1251(m), 1180(m), 1125(m), 1098(w), 1062(m), 1039(w), 985(m), 921(m), 861(m), 798(m), 740(s). Anal. Calcd for  $\text{C}_{78}\text{H}_{104}\text{Yb}_2\text{N}_{10}\text{O}_2$ : C, 60.06; H, 6.72; N, 8.98. Found: C, 60.32; H, 6.71; N, 9.01.

**Preparation of 4c.** A similar procedure to that for the preparation of complex **4a** was used. Yellow crystals were obtained at room temperature by standing the extraction for several days (77 mg, 66%). M.P. (sealed): 185 °C (Dec.) under Ar. IR (KBr pellet,  $\text{cm}^{-1}$ ):  $\nu$  3051(m), 2908(s), 2848(m), 2808(w), 2674(w), 2379(w), 2310(w), 1924(w), 1633(s), 1592(s), 1571(m), 1539(m), 1498(m), 1462(s), 1445(w), 1378(w), 1355(m), 1308(m), 1250(m), 1180(m), 1123(m), 1097(w), 1062(m), 1039(w), 988(m), 921(m), 860(m), 798(m), 742(s). Anal. Calcd for  $\text{C}_{78}\text{H}_{104}\text{Er}_2\text{N}_{10}\text{O}_2$ : C, 60.51; H, 6.77; N, 9.05. Found: C, 60.37; H, 6.61; N, 8.87.

**Preparation of 4d.** A similar procedure to that for the preparation of complex **4a** was used. Yellow



crystals were obtained at room temperature by standing the extraction for several days (74 mg, 71%). M.P. (sealed): 178 °C (Dec.) under Ar. IR (KBr pellet,  $\text{cm}^{-1}$ ):  $\nu$  3050(m), 2906(s), 2848(m), 2810(w), 2675(w), 2379(w), 2310(w), 1925(w), 1632(s), 1592(s), 1571(m), 1537(m), 1498(m), 1460(s), 1445(w), 1379(w), 1355(m), 1308(m), 1251(m), 1180(m), 1123(m), 1097(w), 1062(m), 1039(w), 986(m), 923(m), 862(m), 798(m), 740(s).  $^1\text{H}$  NMR (500 MHz, THF- $d_8$ , ppm, 298 K):  $\delta$  8.49 (s, 2H, -CH=N-), 8.48 (br, 2H), 7.44-7.42 (m, 2H), 7.23-7.12 (m, 14H), 7.02-6.99 (m, 4H), 4.34-4.31 (m, 4H, -CH<sub>2</sub>-), 3.67-3.65 (m, 8H, THF), 3.22-3.16 (m, 4H, -CH(CH<sub>3</sub>)<sub>2</sub>), 2.70 (s, 6H, -NCH<sub>3</sub>), 2.69-2.66 (m, 4H, -CH<sub>2</sub>-), 2.50 (br, 8H, -CH<sub>2</sub>-), 1.83-1.80 (m, 8H, THF), 1.63-1.58 (m, 8H, -CH<sub>2</sub>-), 1.48-1.47 (m, 4H, -CH<sub>2</sub>-), 1.36 (br, 2H, -CH-), 1.20 (d,  $J = 10.0$  Hz, 24H, -CH(CH<sub>3</sub>)<sub>2</sub>).  $^{13}\text{C}\{^1\text{H}\}$  NMR (125 MHz, THF- $d_8$ , ppm, 298 K):  $\delta$  156.4 (imine C), 152.1, 142.7, 138.1, 137.1, 126.9, 123.1, 122.7, 122.1, 122.0, 121.2, 111.3, 109.1, 67.3, 58.4, 55.4, 41.7, 28.1, 26.5, 25.8, 25.2 (d,  $J_{\text{Y-C}} = 25.0$  Hz, -CH-), 23.3, 9.7 (NCH<sub>3</sub>).  $^{89}\text{Y}$  NMR (24.5 MHz, THF- $d_8$ , ppm, 298 K):  $\delta$  880.7. Anal. Calcd for C<sub>78</sub>H<sub>104</sub>Y<sub>2</sub>N<sub>10</sub>O<sub>2</sub>: C, 67.32; H, 7.53; N, 10.07. Found: C, 67.14; H, 7.67; N, 10.18.

**Preparation of 5a.** To a mixture of **2a** (0.15 mmol, 163 mg) and 2-*N,N*-dimethylaminopyridine (0.3 mmol, 36  $\mu\text{L}$ ) was added 3 mL toluene, the resulted mixture was allowed to be stirred at room temperature for 2 h. After the reaction was completed, the solvent was evaporated under reduced pressure. The residue was extracted with a mixture of *n*-hexane (6 mL) and THF (0.2 mL). Black crystals were obtained at room temperature by standing the extraction for several days (106 mg, 62%). M.P. (sealed): 172 °C (Dec.) under Ar. IR (KBr pellet,  $\text{cm}^{-1}$ ):  $\nu$  3054(m), 2956(m), 2936(w), 2863(m), 2806(m), 2771(m), 2693(w), 2379(w), 2312(w), 1856(w), 1785(w), 1624(s), 1533(m), 1463(s), 1444(m), 1391(s), 1354(m), 1327(m), 1243(m), 1163(s), 1127(m), 1102(m), 1041(m), 1007(w), 954(w), 931(w), 912(w), 854(s), 769(m), 744(s).  $^1\text{H}$  NMR (500 MHz, C<sub>6</sub>D<sub>6</sub>, ppm, 298 K):  $\delta$  8.45 (s, 2H, -CH=N-), 7.33 (d,  $J = 5.0$  Hz, 2H, Py-*H*), 7.27-7.26 (m, 2H, Ph-*H*), 7.14-7.11 (m, 2H, Ph-*H*), 7.06-6.97 (m, 8H, Ph-*H*), 6.76-6.73 (m, 1H, Ph-*H*), 6.62-6.60 (m, 1H, Ph-*H*), 5.63 (d,  $J = 10.0$  Hz, 1H, Py-*H*), 5.59 (t,  $J = 7.5$  Hz, 1H, Py-*H*), 4.06-4.02 (m, 2H, -CH<sub>2</sub>-), 3.59-3.56 (m, 2H, -CH<sub>2</sub>-), 3.49-3.43 (m, 4H, -CH(CH<sub>3</sub>)<sub>2</sub>), 2.96 (br, 4H, -CH<sub>2</sub>-), 2.23-2.22 (m, 11H, -CH<sub>2</sub>- & -NCH<sub>3</sub>), 1.57 (d,  $J = 10.0$  Hz, 6H, -CH(CH<sub>3</sub>)<sub>2</sub>), 1.55-1.52 (m, 8H, -CH<sub>2</sub>-), 1.49 (d,  $J = 10.0$  Hz, 6H, -CH(CH<sub>3</sub>)<sub>2</sub>), 1.33-1.29 (m, 4H, -CH<sub>2</sub>-), 1.29-1.28 (m, 2H, -CH<sub>2</sub>-Lu), 1.09-1.08 (m, 2H, -CH<sub>2</sub>-Lu), 1.06 (d,  $J = 5.0$  Hz, 6H, -CH(CH<sub>3</sub>)<sub>2</sub>), 1.01 (d,  $J = 5.0$  Hz, 6H, -CH(CH<sub>3</sub>)<sub>2</sub>).  $^{13}\text{C}\{^1\text{H}\}$  NMR (125 MHz, C<sub>6</sub>D<sub>6</sub>, ppm, 298 K):  $\delta$  171.0 (imine C), 161.7, 160.3, 150.1, 144.4, 142.8, 139.7, 138.3, 130.0, 125.3, 124.6, 122.7, 120.9, 120.3, 114.1, 109.0, 106.1, 103.9, 100.3, 56.0, 55.1, 40.6, 33.0, 29.8, 28.5, 26.6, 26.5, 25.3, 24.8, 24.5. Anal. Calcd for C<sub>64</sub>H<sub>83</sub>LuN<sub>8</sub>: C, 67.47; H, 7.34; N, 9.83. Found: C, 67.77; H, 7.68; N, 9.79.

**Preparation of 5b.** A similar procedure to that for the preparation of complex **5a** was used. Black crystals were obtained at room temperature by standing the extraction for several days (107 mg, 63%). M.P. (sealed): 175 °C (Dec.) under Ar. IR (KBr pellet,  $\text{cm}^{-1}$ ):  $\nu$  3055(m), 2956(m), 2935(w), 2862(m), 2806(m), 2770(m), 2693(w), 2379(w), 2313(w), 1856(w), 1785(w), 1625(s), 1534(m), 1463(s), 1445(m), 1390(s), 1354(m), 1327(m), 1242(m), 1163(s), 1127(m), 1102(m), 1042(m), 1007(w), 954(w), 930(w), 912(w), 855(s), 769(m), 743(s). Anal. Calcd for C<sub>64</sub>H<sub>83</sub>YbN<sub>8</sub>: C, 67.58; H, 7.36; N, 9.85. Found: C, 67.90; H, 7.68; N, 9.91.

**Preparation of 5c.** A similar procedure to that for the preparation of complex **5a** was used. Black crystals were obtained at room temperature by standing the extraction for several days (110 mg, 65%). M.P. (sealed): 176 °C (Dec.) under Ar. IR (KBr pellet,  $\text{cm}^{-1}$ ):  $\nu$  3054(m), 2955(m), 2935(w), 2863(m), 2806(m), 2770(m), 2693(w), 2378(w), 2312(w), 1857(w), 1785(w), 1624(s), 1533(m), 1462(s), 1444(m), 1391(s), 1355(m), 1327(m), 1243(m), 1165(s), 1128(m), 1102(m), 1041(m), 1008(w), 954(w), 931(w), 913(w), 854(s), 769(m), 744(s). Anal. Calcd for C<sub>64</sub>H<sub>83</sub>ErN<sub>8</sub>: C, 67.93;

H, 7.39; N, 9.90. Found: C, 68.00; H, 7.40; N, 9.89.

**Preparation of 5d.** A similar procedure to that for the preparation of complex **5a** was used. Black crystals were obtained at room temperature by standing the extraction for several days (109 mg, 69%). M.P. (sealed): 177 °C (Dec.) under Ar. IR (KBr pellet,  $\text{cm}^{-1}$ ):  $\nu$  3056(m), 2956(m), 2936(w), 2863(m), 2807(m), 2771(m), 2694(w), 2379(w), 2312(w), 1856(w), 1785(w), 1624(s), 1534(m), 1463(s), 1444(m), 1390(s), 1354(m), 1328(m), 1248(m), 1163(s), 1126(m), 1101(m), 1040(m), 1008(w), 954(w), 930(w), 912(w), 854(s), 769(m), 743(s).  $^1\text{H}$  NMR (500 MHz,  $\text{C}_6\text{D}_6$ , ppm, 298 K):  $\delta$  8.43 (s, 2H,  $-\text{CH}=\text{N}-$ ), 7.30 (d,  $J = 10.0$  Hz, 2H, Py-*H*), 7.27-7.20 (m, 2H, Ph-*H*), 7.13-7.12 (m, 2H, Ph-*H*), 7.05-6.93 (m, 8H, Ph-*H*), 6.77-6.73 (m, 1H, Ph-*H*), 6.57-6.56 (m, 1H, Ph-*H*), 5.66 (d,  $J = 10.0$  Hz, 1H, Py-*H*), 5.57 (t,  $J = 7.5$  Hz, 1H, Py-*H*), 3.99 (br, 2H,  $-\text{CH}_2-$ ), 3.60-3.57 (m, 6H,  $-\text{CH}_2-$  &  $-\text{CH}(\text{CH}_3)_2$ ), 3.00-2.96 (m, 4H,  $-\text{CH}_2-$ ), 2.27-2.16 (m, 11H,  $-\text{CH}_2-$  &  $-\text{NCH}_3$ ), 1.58-1.47 (m, 20H,  $-\text{CH}_2-$  &  $-\text{CH}(\text{CH}_3)_2$ ), 1.33-1.30 (m, 4H,  $-\text{CH}_2-$ ), 1.29-1.28 (m, 2H,  $-\text{CH}_2-\text{Y}$ ), 1.23-1.21 (m, 2H,  $-\text{CH}_2-\text{Y}$ ), 1.06-1.02 (m, 12H,  $-\text{CH}(\text{CH}_3)_2$ ).  $^{13}\text{C}\{^1\text{H}\}$  NMR (125 MHz,  $\text{C}_6\text{D}_6$ , ppm, 298 K):  $\delta$  171.4 (imine C), 160.0, 159.1, 149.3, 144.0, 139.4, 138.4, 129.7, 124.9, 124.6, 124.2, 122.6, 120.4, 113.6, 108.4, 105.7, 103.3, 99.1, 55.5, 55.4 (d,  $J_{\text{Y-C}} = 25.0$  Hz,  $-\text{CH}_2-$ ), 54.8, 40.5, 32.7, 29.5, 28.3, 26.2, 24.9, 24.5, 24.2. Anal. Calcd for  $\text{C}_{64}\text{H}_{83}\text{YN}_8$ : C, 72.98; H, 7.94; N, 10.64. Found: C, 72.87; H, 7.98; N, 10.68.

**Preparation of 6a.** To a mixture of **2a** (0.15 mmol, 163 mg) and 2-*N*-methylaminopyridine (0.15 mmol, 16  $\mu\text{L}$ ) was added 3 mL toluene, the resulted mixture was allowed to be stirred at room temperature for 2 h. After the reaction was completed, the solvent was evaporated under reduced pressure. The residue was extracted with a mixture of *n*-hexane (6 mL) and toluene (0.2 mL). Yellow crystals were obtained at room temperature by standing the extraction for several days (130 mg, 78%). M.P. (sealed): 169 °C (Dec.) under Ar. IR (KBr pellet,  $\text{cm}^{-1}$ ):  $\nu$  3053(m), 2956(w), 2934(s), 2861(m), 2799(m), 2379(w), 2308(w), 1921(w), 1854(w), 1622(s), 1541(m), 1510(m), 1463(s), 1424(s), 1379(m), 1324(m), 1238(m), 1191(m), 1157(m), 1124(m), 1057(s), 986(m), 928(s), 858(w), 836(w), 743(s).  $^1\text{H}$  NMR (500 MHz,  $\text{C}_6\text{D}_6$ , ppm, 298 K):  $\delta$  8.69 (s, 2H,  $-\text{CH}=\text{N}-$ ), 7.53 (d,  $J = 5.0$  Hz, 2H, Py-*H*), 7.27-7.25 (m, 2H, Ph-*H*), 7.21-7.20 (m, 2H, Ph-*H*), 7.14-7.10 (m, 8H, Ph-*H*), 6.94-6.93 (m, 2H, Ph-*H*), 5.91 (d,  $J = 10.0$  Hz, 1H, Py-*H*), 5.69 (t,  $J = 7.5$  Hz, 1H, Py-*H*), 3.74-3.67 (m, 4H,  $-\text{CH}_2-$ ), 3.26-3.21 (m, 2H,  $-\text{CH}(\text{CH}_3)_2$ ), 2.85-2.80 (m, 2H,  $-\text{CH}(\text{CH}_3)_2$ ), 2.68 (s, 3H,  $-\text{NCH}_3$ ), 2.40-2.34 (m, 2H,  $-\text{CH}_2-$ ), 2.28-2.23 (m, 2H,  $-\text{CH}_2-$ ), 2.11-2.10 (m, 8H,  $-\text{CH}_2-$ ), 1.44-1.40 (m, 14H,  $-\text{CH}_2-$  &  $-\text{CH}(\text{CH}_3)_2$ ), 1.29 (d,  $J = 5.0$  Hz, 6H,  $-\text{CH}(\text{CH}_3)_2$ ), 1.26-1.23 (m, 4H,  $-\text{CH}_2-$ ), 1.09 (d,  $J = 5.0$  Hz, 6H,  $-\text{CH}(\text{CH}_3)_2$ ), 0.34 (d,  $J = 5.0$  Hz, 6H,  $-\text{CH}(\text{CH}_3)_2$ ).  $^{13}\text{C}\{^1\text{H}\}$  NMR (125 MHz,  $\text{C}_6\text{D}_6$ , ppm, 298 K):  $\delta$  216.5 (s, 2-indolyl- $\text{C}_{\text{sp}2}$ ), 171.3 (imine C), 168.7, 148.6, 145.5, 143.4, 142.6, 141.6, 140.3, 130.6, 126.2, 123.7, 123.5, 122.4, 121.4, 121.1, 116.1, 110.7, 106.7, 103.7, 59.9, 55.2, 46.7, 34.3, 30.1, 28.3, 26.4, 25.8, 24.8, 23.6, 21.1. Anal. Calcd for  $\text{C}_{62}\text{H}_{79}\text{LuN}_8$ : C, 67.01; H, 7.17; N, 10.08. Found: C, 67.15; H, 7.46; N, 9.72.

**Preparation of 6b.** A similar procedure to that for the preparation of complex **6a** was used. Yellow crystals were obtained at room temperature by standing the extraction for several days (126 mg, 76%). M.P. (sealed): 172 °C (Dec.) under Ar. IR (KBr pellet,  $\text{cm}^{-1}$ ):  $\nu$  3052(m), 2957(w), 2934(s), 2861(m), 2799(m), 2378(w), 2308(w), 1921(w), 1855(w), 1621(s), 1541(m), 1510(m), 1463(s), 1424(s), 1378(m), 1324(m), 1238(m), 1191(m), 1156(m), 1124(m), 1057(s), 987(m), 928(s), 858(w), 836(w), 742(s). Anal. Calcd for  $\text{C}_{62}\text{H}_{79}\text{YbN}_8$ : C, 67.12; H, 7.18; N, 10.10. Found: C, 66.93; H, 7.46; N, 10.40.

**Preparation of 6c.** A similar procedure to that for the preparation of complex **6a** was used. Yellow crystals were obtained at room temperature by standing the extraction for several days (119 mg, 72%). M.P. (sealed): 175 °C (Dec.) under Ar. IR (KBr pellet,  $\text{cm}^{-1}$ ):  $\nu$  3054(m), 2956(w), 2934(s),

2861(m), 2799(m), 2379(w), 2308(w), 1921(w), 1854(w), 1622(s), 1541(m), 1511(m), 1462(s), 1424(s), 1378(m), 1325(m), 1238(m), 1192(m), 1157(m), 1123(m), 1057(s), 986(m), 927(s), 858(w), 835(w), 742(s). Anal. Calcd for C<sub>62</sub>H<sub>79</sub>ErN<sub>8</sub>: C, 67.48; H, 7.22; N, 10.15. Found: C, 67.13; H, 7.57; N, 9.88.

**Preparation of 6d.** A similar procedure to that for the preparation of complex **6a** was used. Yellow crystals were obtained at room temperature by standing the extraction for several days (115 mg, 75%). M.P. (sealed): 170 °C (Dec.) under Ar. IR (KBr pellet, cm<sup>-1</sup>):  $\nu$  3053(m), 2956(w), 2934(s), 2861(m), 2799(m), 2379(w), 2308(w), 1921(w), 1854(w), 1622(s), 1541(m), 1510(m), 1462(s), 1425(s), 1378(m), 1323(m), 1238(m), 1190(m), 1158(m), 1124(m), 1058(s), 986(m), 929(s), 858(w), 836(w), 743(s). <sup>1</sup>H NMR (500 MHz, C<sub>6</sub>D<sub>6</sub>, ppm, 298 K):  $\delta$  8.62 (s, 2H, -CH=N-), 7.51 (d,  $J$  = 10.0 Hz, 2H, Py-*H*), 7.26-7.23 (m, 4H, Ph-*H*), 7.14-7.09 (m, 8H, Ph-*H*), 6.97-6.95 (m, 2H, Ph-*H*), 5.94 (d,  $J$  = 10.0 Hz, 1H, Py-*H*), 5.72 (t,  $J$  = 7.5 Hz, 1H, Py-*H*), 3.75-3.58 (m, 4H, -CH<sub>2</sub>-), 3.22-3.17 (m, 2H, -CH(CH<sub>3</sub>)<sub>2</sub>), 2.85-2.79 (m, 2H, -CH(CH<sub>3</sub>)<sub>2</sub>), 2.68 (s, 3H, -NCH<sub>3</sub>), 2.45-2.39 (m, 2H, -CH<sub>2</sub>-), 2.31-2.25 (m, 2H, -CH<sub>2</sub>-), 2.13-2.09 (m, 8H, -CH<sub>2</sub>-), 1.46-1.36 (m, 14H, -CH<sub>2</sub>- & -CH(CH<sub>3</sub>)<sub>2</sub>), 1.28 (d,  $J$  = 5.0 Hz, 6H, -CH(CH<sub>3</sub>)<sub>2</sub>), 1.11 (d,  $J$  = 5.0 Hz, 6H, -CH(CH<sub>3</sub>)<sub>2</sub>), 0.97-0.93 (m, 4H, -CH<sub>2</sub>-), 0.36 (d,  $J$  = 5.0 Hz, 6H, -CH(CH<sub>3</sub>)<sub>2</sub>). <sup>13</sup>C {<sup>1</sup>H} NMR (125 MHz, C<sub>6</sub>D<sub>6</sub>, ppm, 298 K):  $\delta$  206.0 (d,  $J_{Y-C}$  = 50.0 Hz, 2-indolyl-*C*<sub>sp2</sub>), 170.7 (imine *C*), 167.1, 146.9, 144.2, 141.8, 140.9, 139.8, 138.9, 129.3, 124.7, 122.3, 120.0, 119.8, 114.8, 109.3, 105.2, 102.2, 58.4, 53.7, 45.7, 32.9, 28.7, 27.2, 25.0, 24.9, 24.1, 23.4, 22.3, 19.8. Anal. Calcd for C<sub>62</sub>H<sub>79</sub>YN<sub>8</sub>: C, 72.63; H, 7.77; N, 10.93. Found: C, 72.66; H, 8.05; N, 10.88.

**Preparation of 7a.** To a mixture of **3b** (0.15 mmol, 173 mg) and 2-*N,N*-dimethylaminopyridine (0.15 mmol, 18  $\mu$ L) was added 3 mL toluene, the resulted mixture was allowed to be stirred at room temperature for 2 h. After the reaction was completed, the solvent was evaporated under reduced pressure. The residue was extracted with a mixture of *n*-hexane (6 mL) and THF (0.2 mL). Black crystals were obtained at room temperature by standing the extraction for several days (106 mg, 62%). M.P. (sealed): 179 °C (Dec.) under Ar. IR (KBr pellet, cm<sup>-1</sup>):  $\nu$  3049(m), 2937(s), 2860(m), 2796(m), 2766(w), 2379(w), 2310(w), 1921(w), 1620(s), 1518(m), 1462(m), 1426(s), 1378(m), 1328(m), 1293(m), 1260(m), 1237(m), 1191(m), 1156(m), 1122(m), 1058(s), 987(w), 928(m), 862(m), 838(m), 739(s). Anal. Calcd for C<sub>63</sub>H<sub>85</sub>ErN<sub>8</sub>: C, 66.51; H, 7.53; N, 9.85. Found: C, 66.85; H, 7.65; N, 10.03.

**Preparation of 7b.** A similar procedure to that for the preparation of complex **7a** was used. Black crystals were obtained at room temperature by standing the extraction for several days (94 mg, 59%). M.P. (sealed): 175 °C (Dec.) under Ar. IR (KBr pellet, cm<sup>-1</sup>):  $\nu$  3048(m), 2936(s), 2860(m), 2795(m), 2766(w), 2379(w), 2312(w), 1921(w), 1620(s), 1518(m), 1463(m), 1425(s), 1378(m), 1328(m), 1293(m), 1261(m), 1237(m), 1190(m), 1156(m), 1123(m), 1058(s), 988(w), 928(m), 863(m), 838(m), 740(s). <sup>1</sup>H NMR (500 MHz, C<sub>6</sub>D<sub>6</sub>, ppm, 298 K):  $\delta$  8.95 (s, 1H, -CH=N-), 7.75 (d,  $J$  = 10.0 Hz, 1H, Py-*H*), 7.56-7.54 (m, 1H, Py-*H*), 7.42-7.41 (m, 1H, Py-*H*), 7.31-7.24 (m, 4H, Ph-*H*), 7.05-7.00 (m, 4H, Ph-*H*), 6.69 (br, 1H, -C=CH-NR-), 3.80 (br, 8H, THF & -CH<sub>2</sub>-), 2.75-2.63 (m, 4H, -CH<sub>2</sub>-), 2.32-2.26 (m, 8H, -CH<sub>2</sub>-), 2.13-2.11 (m, 6H, Ad-*H*), 2.04 (br, 4H, -CH<sub>2</sub>-), 1.95 (br, 6H, -N(CH<sub>3</sub>)<sub>2</sub>), 1.70-1.62 (m, 4H, -CH<sub>2</sub>-), 1.56-1.53 (m, 12H, Ad-*H*), 1.46 (br, 4H, THF), 1.40-1.34 (m, 12H, Ad-*H*), 1.27-1.20 (m, 4H, -CH<sub>2</sub>-). <sup>13</sup>C {<sup>1</sup>H} NMR (125 MHz, C<sub>6</sub>D<sub>6</sub>, ppm, 298 K):  $\delta$  202.2 (d,  $J_{Y-C}$  = 50.0 Hz, 2-indolyl-*C*<sub>sp2</sub>), 164.8 (imine *C*), 160.5, 149.3, 140.3, 130.7, 122.8, 121.9, 120.6, 120.5, 119.6, 116.2, 115.3, 111.7, 110.1, 84.0, 70.4, 59.3, 57.6, 55.1, 51.0, 48.5, 44.6, 44.0, 37.1, 36.4, 30.0, 26.4, 26.1, 25.1, 24.7, 24.4. Anal. Calcd for C<sub>63</sub>H<sub>85</sub>YN<sub>8</sub>: C, 71.43; H, 8.09; N, 10.58. Found: C, 71.08; H, 7.90; N, 10.76.

**Preparation of 8a.** To a mixture of **2c** (0.15 mmol, 173 mg) and 2-phenylpyridine (0.15 mmol,

22  $\mu\text{L}$ ) was added 3 mL toluene, the resulted mixture was allowed to be stirred at room temperature for 2 h. After the reaction was completed, the solvent was evaporated under reduced pressure. The residue was extracted with a mixture of *n*-hexane (6 mL) and THF (0.2 mL). Black crystals were obtained at room temperature by standing the extraction for several days (122 mg, 71%). M.P. (sealed): 162 °C (Dec.) under Ar. IR (KBr pellet,  $\text{cm}^{-1}$ ):  $\nu$  3056(m), 2955(s), 2931(s), 2861(m), 2806(m), 2772(m), 2695(w), 2375(w), 2308(w), 1625(s), 1585(s), 1535(m), 1463(s), 1444(s), 1392(s), 1354(m), 1326(m), 1243(w), 1163(s), 1125(m), 1103(w), 1042(w), 1008(w), 956(w), 932(w), 912(s), 854(m), 790(m), 743(s). Anal. Calcd for  $\text{C}_{67}\text{H}_{80}\text{ErN}_7$ : C, 69.94; H, 7.01; N, 8.52. Found: C, 70.14; H, 7.32; N, 8.25.

**Preparation of 8b.** A similar procedure to that for the preparation of complex **8a** was used. Black crystals were obtained at room temperature by standing the extraction for several days (91 mg, 57%). M.P. (sealed): 171 °C (Dec.) under Ar. IR (KBr pellet,  $\text{cm}^{-1}$ ):  $\nu$  3055(m), 2957(s), 2931(s), 2863(m), 2804(m), 2772(m), 2694(w), 2376(w), 2308(w), 1626(s), 1585(s), 1535(m), 1463(s), 1444(s), 1391(s), 1354(m), 1325(m), 1242(w), 1162(s), 1125(m), 1102(w), 1042(w), 1006(w), 956(w), 932(w), 913(s), 855(m), 791(m), 743(s).  $^1\text{H}$  NMR (500 MHz, THF- $d_8$ , ppm, 298 K):  $\delta$  8.54 (s, 2H,  $-\text{CH}=\text{N}-$ ), 7.89-7.84 (m, 2H, Py-*H*), 7.56-7.55 (m, 1H, Ph-*H*), 7.51-7.50 (m, 1H, Ph-*H*), 7.44-7.43 (m, 1H, Ph-*H*), 7.30-7.28 (m, 1H, Ph-*H*), 7.23-7.21 (m, 2H, Ph-*H*), 7.05-7.04 (m, 2H, Ph-*H*), 7.01-6.99 (m, 2H, Ph-*H*), 6.82-6.80 (m, 2H, Ph-*H*), 6.73-6.72 (m, 4H, Ph-*H*), 6.66-6.64 (m, 2H, Ph-*H*), 6.40-6.37 (m, 1H, Py-*H*), 6.33-6.32 (m, 1H, Py-*H*), 4.85-4.79 (m, 2H,  $-\text{CH}_2-$ ), 4.54-4.49 (m, 2H,  $-\text{CH}_2-$ ), 4.12-4.07 (m, 2H,  $-\text{CH}(\text{CH}_3)_2$ ), 3.53-3.47 (m, 2H,  $-\text{CH}(\text{CH}_3)_2$ ), 3.03-2.94 (m, 4H,  $-\text{CH}_2-$ ), 2.82-2.74 (m, 4H,  $-\text{CH}_2-$ ), 2.68-2.56 (m, 4H,  $-\text{CH}_2-$ ), 1.52-1.38 (m, 8H,  $-\text{CH}_2-$ ), 1.37 (d,  $J = 5.0$  Hz, 3H,  $-\text{CH}(\text{CH}_3)_2$ ), 1.27 (d,  $J = 5.0$  Hz, 3H,  $-\text{CH}(\text{CH}_3)_2$ ), 1.25 (d,  $J = 5.0$  Hz, 3H,  $-\text{CH}(\text{CH}_3)_2$ ), 1.05 (d,  $J = 5.0$  Hz, 3H,  $-\text{CH}(\text{CH}_3)_2$ ), 0.93 (d,  $J = 10.0$  Hz, 3H,  $-\text{CH}(\text{CH}_3)_2$ ), 0.59 (d,  $J = 5.0$  Hz, 3H,  $-\text{CH}(\text{CH}_3)_2$ ), 0.20 (d,  $J = 5.0$  Hz, 3H,  $-\text{CH}(\text{CH}_3)_2$ ), 0.09 (d,  $J = 5.0$  Hz, 3H,  $-\text{CH}(\text{CH}_3)_2$ ).  $^{13}\text{C}\{^1\text{H}\}$  NMR (125 MHz, THF- $d_8$ , ppm, 298 K):  $\delta$  203.2 (d,  $J_{\text{Y-C}} = 37.5$  Hz, 2-indolyl- $C_{\text{sp}2}$ ), 192.0 (d,  $J_{\text{Y-C}} = 37.5$  Hz, phenyl- $C_{\text{sp}2}$ ), 170.1 (imine C), 162.6, 156.7, 151.4, 150.5, 149.7, 147.6, 146.8, 145.8, 142.6, 141.5, 141.4, 141.1, 140.1, 137.3, 131.9, 131.1, 129.4, 128.6, 126.5, 125.0, 124.9, 124.6, 124.5, 124.1, 123.1, 122.9, 122.7, 122.1, 120.8, 120.7, 118.8, 117.4, 116.7, 114.2, 111.4, 106.3, 103.7, 71.4, 59.6, 56.3, 55.6, 55.0, 54.8, 50.3, 43.3, 29.1, 28.5, 28.1, 26.9, 26.5, 25.6, 25.5, 23.9, 22.0, 19.7.  $^{89}\text{Y}$  NMR (24.5 MHz,  $\text{C}_6\text{D}_6$ , ppm, 298 K):  $\delta$  501.0. Anal. Calcd for  $\text{C}_{67}\text{H}_{80}\text{YN}_7$ : C, 75.05; H, 7.52; N, 9.14. Found: C, 74.94; H, 7.89; N, 9.15.

**Preparation of 9.** A similar procedure to that for the preparation of complex **8a** was used. Black crystals were obtained at room temperature by standing the extraction for several days (124 mg, 68%). M.P. (sealed): 168 °C (Dec.) under Ar. IR (KBr pellet,  $\text{cm}^{-1}$ ):  $\nu$  3053(m), 2956(s), 2930(s), 2862(m), 2806(m), 2770(m), 2695(w), 2375(w), 2308(w), 1625(s), 1585(s), 1536(m), 1464(s), 1444(s), 1392(s), 1354(m), 1326(m), 1242(w), 1163(s), 1126(m), 1103(w), 1042(w), 1007(w), 956(w), 930(w), 913(s), 855(m), 789(m), 743(s). Anal. Calcd for  $\text{C}_{67}\text{H}_{80}\text{DyN}_7$ : C, 70.01; H, 7.28; N, 8.05. Found: C, 69.80; H, 7.41; N, 8.00.

**Preparation of 10a.** To a mixture of **2c** (0.15 mmol, 173 mg) and DMAP (0.3 mmol, 37 mg) was added 3 mL toluene, the resulted mixture was allowed to be stirred at room temperature for 2 h. After the reaction was completed, the solvent was evaporated under reduced pressure. The residue was extracted with a mixture of *n*-hexane (6 mL) and THF (0.2 mL). Black crystals were obtained at room temperature by standing the extraction for several days (104 mg, 56%). M.P. (sealed): 156 °C (Dec.) under Ar. IR (KBr pellet,  $\text{cm}^{-1}$ ):  $\nu$  3051(w), 2906(s), 2846(m), 2808(w), 2676(w), 2380(w), 2312(w), 1635(s), 1538(m), 1461(m), 1449(m), 1386(m), 1358(m), 1307(w), 1226(w), 1177(m), 1123(m), 1095(w), 1038(w), 992(m), 921(w), 858(m), 807(m), 742(s). Anal. Calcd for  $\text{C}_{70}\text{H}_{91}\text{ErN}_{10}$ :

C, 67.81; H, 7.40; N, 11.30. Found: C, 68.05; H, 7.56; N, 11.20.

**Preparation of 10b.** A similar procedure to that for the preparation of complex **10a** was used. Black crystals were obtained at room temperature by standing the extraction for several days (85 mg, 49%). M.P. (sealed): 136 °C (Dec.) under Ar. IR (KBr pellet,  $\text{cm}^{-1}$ ):  $\nu$  3052(w), 2905(s), 2847(m), 2809(w), 2675(w), 2380(w), 2312(w), 1635(s), 1538(m), 1461(m), 1448(m), 1385(m), 1358(m), 1307(w), 1226(w), 1176(m), 1123(m), 1095(w), 1037(w), 991(m), 921(w), 858(m), 806(m), 742(s).  $^1\text{H}$  NMR (500 MHz,  $\text{C}_6\text{D}_6$ , ppm, 298 K):  $\delta$  8.84 (s, 1H,  $-\text{CH}=\text{N}-$ ), 7.81 (br, 2H), 7.76-7.74 (m, 1H, Py-*H*), 7.65-7.63 (m, 1H, Py-*H*), 7.55-7.53 (m, 1H, Py-*H*), 7.26-7.22 (m, 4H), 7.13-7.11 (m, 2H), 7.06-7.05 (m, 2H), 7.02-6.97 (m, 4H), 6.45 (s, 1H,  $-\text{C}=\text{CH}-\text{NR}-$ ), 5.71 (br, 1H, Py-*H*), 5.56 (br, 1H, Py-*H*), 4.69 (br, 1H, Py-*H*), 4.57 (br, 1H, Py-*H*), 3.33-3.30 (m, 2H,  $-\text{CH}_2-$ ), 2.84-2.79 (m, 2H,  $-\text{CH}_2-$ ), 2.70-2.63 (m, 2H,  $-\text{CH}(\text{CH}_3)_2$ ), 2.55-2.48 (m, 2H,  $-\text{CH}(\text{CH}_3)_2$ ), 2.41 (s, 6H,  $-\text{N}(\text{CH}_3)_2$ ), 2.30 (br, 4H,  $-\text{CH}_2-$ ), 2.11 (s, 6H,  $-\text{N}(\text{CH}_3)_2$ ), 1.88-1.83 (m, 8H,  $-\text{CH}_2-$ ), 1.64-1.58 (m, 4H,  $-\text{CH}_2-$ ), 1.52-1.41 (m, 8H,  $-\text{CH}_2-$ ), 1.29 (d,  $J = 5.0$  Hz, 3H,  $-\text{CH}(\text{CH}_3)_2$ ), 1.23 (d,  $J = 5.0$  Hz, 6H,  $-\text{CH}(\text{CH}_3)_2$ ), 1.15 (d,  $J = 5.0$  Hz, 6H,  $-\text{CH}(\text{CH}_3)_2$ ), 0.95 (d,  $J = 5.0$  Hz, 3H,  $-\text{CH}(\text{CH}_3)_2$ ), 0.66 (d,  $J = 5.0$  Hz, 3H,  $-\text{CH}(\text{CH}_3)_2$ ), 0.61 (d,  $J = 5.0$  Hz, 3H,  $-\text{CH}(\text{CH}_3)_2$ ).  $^{13}\text{C}\{^1\text{H}\}$  NMR (125 MHz,  $\text{C}_6\text{D}_6$ , ppm, 298 K):  $\delta$  204.3 (d,  $J_{\text{Y-C}} = 37.5$  Hz, 2-indolyl- $\text{C}_{\text{sp}2}$ ), 167.2 (imine C), 159.4, 156.2, 154.7, 154.4, 151.8, 150.8, 150.5, 148.8, 148.5, 147.7, 145.2, 144.7, 143.7, 138.4, 137.9, 134.2, 129.3, 125.7, 124.0, 123.6, 123.4, 122.1, 119.1, 117.6, 116.9, 115.8, 113.8, 109.8, 108.1, 105.6, 104.9, 104.5, 102.3, 101.8, 100.8, 89.2, 71.4, 59.9, 58.3, 55.7, 55.3, 54.9, 44.5, 38.8, 38.1, 38.0, 28.6, 26.7, 26.6, 26.4, 25.5, 24.7, 24.6, 23.8, 21.4. Anal. Calcd for  $\text{C}_{70}\text{H}_{91}\text{YN}_{10}$ : C, 72.39; H, 7.90; N, 12.06. Found: C, 72.70; H, 8.05; N, 11.87.

**Preparation of 10c.** A similar procedure to that for the preparation of complex **10a** was used. Black crystals were obtained at room temperature by standing the extraction for several days (122 mg, 66%). M.P. (sealed): 159 °C (Dec.) under Ar. IR (KBr pellet,  $\text{cm}^{-1}$ ):  $\nu$  3051(w), 2906(s), 2846(m), 2808(w), 2676(w), 2382(w), 2310(w), 1634(s), 1538(m), 1462(m), 1448(m), 1385(m), 1357(m), 1307(w), 1226(w), 1175(m), 1123(m), 1093(w), 1038(w), 991(m), 920(w), 858(m), 808(m), 741(s). Anal. Calcd for  $\text{C}_{70}\text{H}_{91}\text{DyN}_{10}$ : C, 68.07; H, 7.43; N, 11.34. Found: C, 67.99; H, 7.57; N, 11.46.

**Preparation of 11.** To a mixture of **3d** (0.15 mmol, 164 mg) and 4-*N,N*-dimethylaminopyridine (DMAP) (0.3 mmol, 37 mg) was added 3 mL toluene, the resulted mixture was allowed to be stirred at room temperature for 2 h. After the reaction was completed, the solvent was evaporated under reduced pressure. The residue was extracted with a mixture of *n*-hexane (6 mL) and THF (0.2 mL). Black crystals were obtained at room temperature by standing the extraction for several days (122 mg, 69%). M.P. (sealed): 156 °C (Dec.) under Ar. IR (KBr pellet,  $\text{cm}^{-1}$ ):  $\nu$  3055(m), 2957(s), 2933(s), 2863(m), 2806(m), 2126(w), 1922(w), 1626(s), 1535(m), 1463(s), 1442(s), 1386(s), 1356(m), 1260(w), 1225(s), 1164(s), 1125(m), 1104(w), 1042(m), 990(s), 950(m), 855(s), 806(s), 745(s). Anal. Calcd for  $\text{C}_{66}\text{H}_{87}\text{DyN}_{10}$ : C, 67.01; H, 7.41; N, 11.84. Found: C, 67.23; H, 7.75; N, 12.00.

**Preparation of 12a.** To a mixture of **2b** (0.15 mmol, 163 mg) and 2,2'-bipyridine (0.15 mmol, 24 mg) was added 3 mL toluene, the resulted mixture was allowed to be stirred at room temperature for 2 h. After the reaction was completed, the solvent was evaporated under reduced pressure. The residue was extracted with a mixture of *n*-hexane (6 mL) and THF (0.2 mL). Black crystals were obtained at room temperature by standing the extraction for several days (115 mg, 66%). M.P. (sealed): 155 °C (Dec.) under Ar. IR (KBr pellet,  $\text{cm}^{-1}$ ):  $\nu$  3057(m), 2957(s), 2934(s), 2863(m), 2804(w), 2379(w), 2311(w), 1627(s), 1583(m), 1538(m), 1463(s), 1390(s), 1356(m), 1325(m), 1248(m), 1165(s), 1125(m), 1103(m), 1040(w), 1008(w), 931(w), 913(s), 854(m), 789(m), 746(s). Anal. Calcd for  $\text{C}_{66}\text{H}_{80}\text{YbN}_8$ : C, 68.43; H, 6.96; N, 9.67. Found: C, 68.61; H, 6.61; N, 9.72.

**Preparation of 12b.** A similar procedure to that for the preparation of complex **12a** was used. Black crystals were obtained at room temperature by standing the extraction for several days (100 mg, 58%). M.P. (sealed): 158 °C (Dec.) under Ar. IR (KBr pellet,  $\text{cm}^{-1}$ ):  $\nu$  3056(m), 2958(s), 2933(s), 2863(m), 2805(w), 2379(w), 2312(w), 1625(s), 1583(m), 1537(m), 1463(s), 1391(s), 1355(m), 1325(m), 1247(m), 1165(s), 1126(m), 1103(m), 1041(w), 1008(w), 930(w), 913(s), 854(m), 788(m), 745(s). Anal. Calcd for  $\text{C}_{66}\text{H}_{80}\text{ErN}_8$ : C, 68.77; H, 7.00; N, 9.72. Found: C, 68.65; H, 7.36; N, 9.75.

**Preparation of 12c.** A similar procedure to that for the preparation of complex **12a** was used. Black crystals were obtained at room temperature by standing the extraction for several days (98 mg, 61%). M.P. (sealed): 168 °C (Dec.) under Ar. IR (KBr pellet,  $\text{cm}^{-1}$ ):  $\nu$  3057(m), 2957(s), 2932(s), 2864(m), 2806(w), 2378(w), 2311(w), 1626(s), 1582(m), 1538(m), 1462(s), 1390(s), 1356(m), 1325(m), 1246(m), 1164(s), 1125(m), 1104(m), 1040(w), 1009(w), 931(w), 912(s), 854(m), 787(m), 744(s).  $^1\text{H}$  NMR (500 MHz, THF- $d_8$ , ppm, 298 K):  $\delta$  8.58 (br, 1H, Py-*H*), 8.45-8.44 (m, 2H, -CH=N-), 8.25 (s, 1H, Py-*H*), 7.79-7.76 (m, 1H, Py-*H*), 7.72 (s, 1H, Py-*H*), 7.45-7.43 (m, 1H, Ph-*H*), 7.27 (br, 1H, Ph-*H*), 7.14-7.11 (m, 4H, Ph-*H*), 7.06-7.05 (m, 4H, Ph-*H*), 6.95-6.92 (m, 4H, Ph-*H*), 6.85 (br, 1H, Py-*H*), 4.29-4.26 (m, 4H, -CH<sub>2</sub>-), 3.14-3.08 (m, 4H, -CH(CH<sub>3</sub>)<sub>2</sub>-), 2.69-2.66 (m, 4H, -CH<sub>2</sub>-), 2.42 (br, 8H, -CH<sub>2</sub>-), 1.54-1.51 (m, 8H, -CH<sub>2</sub>-), 1.40 (br, 4H, -CH<sub>2</sub>-), 1.12 (d, 24H, -CH(CH<sub>3</sub>)<sub>2</sub>-).  $^{13}\text{C}\{^1\text{H}\}$  NMR (125 MHz, THF- $d_8$ , ppm, 298 K):  $\delta$  157.1, 156.8, 152.1, 148.8, 143.5, 140.9, 138.5, 135.7, 127.1, 126.6, 123.9, 123.5, 123.3, 123.1, 121.8, 115.7, 110.4, 108.3, 68.0, 59.2, 56.0, 55.6, 45.2, 30.5, 28.7, 27.1, 26.4, 25.8, 23.9, 21.7. Anal. Calcd for  $\text{C}_{66}\text{H}_{80}\text{YN}_8$ : C, 73.79; H, 7.51; N, 10.43. Found: C, 73.91; H, 7.75; N, 10.58.

**Preparation of 12d.** A similar procedure to that for the preparation of complex **12a** was used. Black crystals were obtained at room temperature by standing the extraction for several days (119 mg, 69%). M.P. (sealed): 162 °C (Dec.) under Ar. IR (KBr pellet,  $\text{cm}^{-1}$ ):  $\nu$  3057(m), 2956(s), 2932(s), 2863(m), 2804(w), 2378(w), 2311(w), 1627(s), 1582(m), 1536(m), 1462(s), 1390(s), 1356(m), 1326(m), 1248(m), 1165(s), 1125(m), 1102(m), 1040(w), 1008(w), 931(w), 913(s), 854(m), 788(m), 745(s). Anal. Calcd for  $\text{C}_{66}\text{H}_{80}\text{DyN}_8$ : C, 69.06; H, 7.02; N, 9.76. Found: C, 68.85; H, 7.01; N, 9.63.

**Preparation of 13.** To a mixture of **3b** (0.15 mmol, 173 mg) and 2,2'-bipyridine (0.15 mmol, 24 mg) was added 3 mL toluene, the resulted mixture was allowed to be stirred at room temperature for 2 h. After the reaction was completed, the solvent was evaporated under reduced pressure. The residue was extracted with a mixture of *n*-hexane (6 mL) and THF (0.2 mL). Black crystals were obtained at room temperature by standing the extraction for several days (87 mg, 53%). M.P. (sealed): 167 °C (Dec.) under Ar. IR (KBr pellet,  $\text{cm}^{-1}$ ):  $\nu$  3057(m), 2958(s), 2931(s), 2863(m), 2804(w), 2380(w), 2312(w), 1642(s), 1615(s), 1556(m), 1515(m), 1490(w), 1463(w), 1438(m), 1382(w), 1354(w), 1320(m), 1273(m), 1178(m), 1121(m), 1041(w), 1030(w), 936(w), 858(s), 741(s). Anal. Calcd for  $\text{C}_{62}\text{H}_{76}\text{ErN}_8$ : C, 67.66; H, 6.96; N, 10.18. Found: C, 67.68; H, 7.19; N, 10.51.

**Preparation of 14a.** To a mixture of **12a** (0.15 mmol, 174 mg) and  $\text{Ph}_2\text{C}=\text{N}_2$  (0.45 mmol, 87 mg) was added 3 mL toluene, the resulted mixture was allowed to be stirred at room temperature overnight. After the reaction was completed, the solvent was evaporated under reduced pressure. The residue was extracted with a mixture of *n*-hexane (4 mL) and PhCl (0.2 mL). Yellow crystals were obtained at room temperature by standing the extraction for several days (127 mg, 54%). M.P. (sealed): 171 °C (Dec.) under Ar. IR (KBr pellet,  $\text{cm}^{-1}$ ):  $\nu$  3052(m), 2955(w), 2934(s), 2860(m), 2797(w), 2379(w), 2308(w), 1621(s), 1541(m), 1513(m), 1463(s), 1425(s), 1379(m), 1325(m), 1237(m), 1191(m), 1156(m), 1123(m), 1057(s), 927(m), 859(w), 836(w), 741(s). Anal. Calcd for  $\text{C}_{95}\text{H}_{102}\text{YbN}_{11}$ : C, 72.63; H, 6.54; N, 9.81. Found: C, 72.28; H, 6.79; N, 9.72.

**Preparation of 14b.** A similar procedure to that for the preparation of complex **14a** was used. Yellow crystals were obtained at room temperature by standing the extraction for several days (134

mg, 57%). M.P. (sealed): 172 °C (Dec.) under Ar. IR (KBr pellet,  $\text{cm}^{-1}$ ):  $\nu$  3051(m), 2956(w), 2933(s), 2860(m), 2797(w), 2379(w), 2307(w), 1620(s), 1542(m), 1514(m), 1463(s), 1426(s), 1378(m), 1325(m), 1236(m), 1190(m), 1156(m), 1124(m), 1057(s), 927(m), 858(w), 836(w), 740(s). Anal. Calcd for  $\text{C}_9\text{H}_{102}\text{ErN}_{11}$ : C, 72.90; H, 6.57; N, 9.84. Found: C, 72.57; H, 6.91; N, 9.75.

**Preparation of 14c.** A similar procedure to that for the preparation of complex **14a** was used. Yellow crystals were obtained at room temperature by standing the extraction for several days (114 mg, 51%). M.P. (sealed): 169 °C (Dec.) under Ar. IR (KBr pellet,  $\text{cm}^{-1}$ ):  $\nu$  3052(m), 2956(w), 2934(s), 2860(m), 2798(w), 2378(w), 2307(w), 1620(s), 1541(m), 1513(m), 1463(s), 1425(s), 1379(m), 1326(m), 1237(m), 1192(m), 1156(m), 1123(m), 1056(s), 928(m), 858(w), 835(w), 740(s).  $^1\text{H}$  NMR (500 MHz,  $\text{C}_6\text{D}_6$ , ppm, 298 K):  $\delta$  8.26 (m, 2H,  $-\text{CH}=\text{N}-$ ), 7.42-7.40 (m, 2H, Ph-*H*), 7.34-7.31 (m, 3H, Ph-*H*), 7.25-7.21 (m, 8H, Ph-*H*), 7.11-7.09 (m, 6H, Ph-*H*), 7.02-6.96 (m, 10H, Ph-*H*), 6.92-6.89 (m, 2H, Ph-*H*), 6.82-6.78 (m, 10H, Ph-*H*), 6.64-6.61 (m, 3H, Ph-*H*), 4.23-4.18 (m, 2H,  $-\text{CH}_2-$ ), 3.21-3.11 (m, 2H,  $-\text{CH}_2-$ ), 3.10-3.02 (m, 4H,  $-\text{CH}(\text{CH}_3)_2$ ), 1.79 (br, 8H,  $-\text{CH}_2-$ ), 1.57-1.51 (m, 4H,  $-\text{CH}_2-$ ), 1.45 (d,  $J = 5.0$  Hz, 6H,  $-\text{CH}(\text{CH}_3)_2$ ), 1.43 (d,  $J = 5.0$  Hz, 6H,  $-\text{CH}(\text{CH}_3)_2$ ), 1.32-1.24 (m, 12H,  $-\text{CH}_2-$ ), 0.83 (d,  $J = 5.0$  Hz, 6H,  $-\text{CH}(\text{CH}_3)_2$ ), 0.45 (d,  $J = 10.0$  Hz, 6H,  $-\text{CH}(\text{CH}_3)_2$ ).  $^{13}\text{C}\{^1\text{H}\}$  NMR (125 MHz,  $\text{C}_6\text{D}_6$ , ppm, 298 K):  $\delta$  160.7 (imine C), 159.9, 157.3, 151.9, 143.8, 143.4, 142.9, 138.4, 137.2, 134.8, 130.4, 129.9, 129.0, 128.8, 128.4, 127.4, 126.5, 124.6, 124.4, 121.4, 121.2, 115.8, 109.9, 99.4, 56.0, 54.4, 40.6, 28.4, 28.0, 26.5, 25.8, 25.1, 24.7. Anal. Calcd for  $\text{C}_9\text{H}_{102}\text{YN}_{11}$ : C, 76.74; H, 6.92; N, 10.36. Found: C, 76.51; H, 6.90; N, 10.00.

### 3. $^1\text{H}$ , $^{13}\text{C}\{^1\text{H}\}$ , 2D HSQC, and $^{89}\text{Y}$ NMR Spectra of the Ligands and Complexes

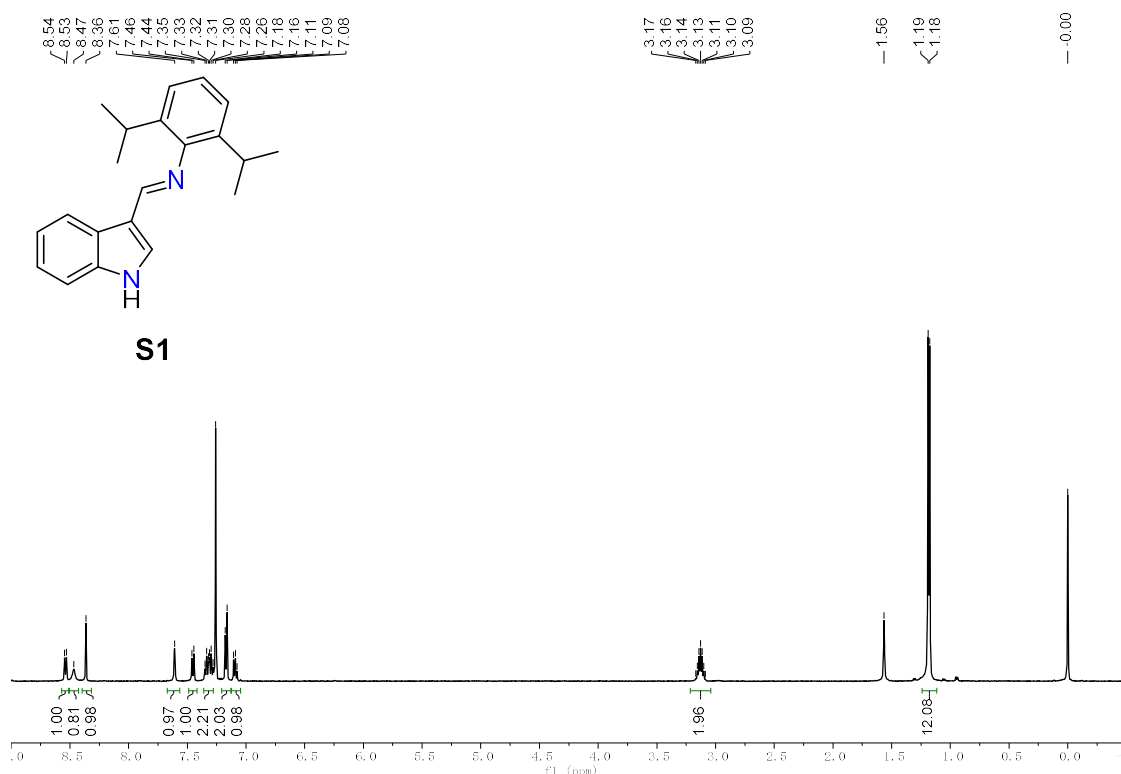

**Fig. S1.**  $^1\text{H}$  NMR spectrum of **S1** (500 MHz,  $\text{CDCl}_3$ , 298 K)

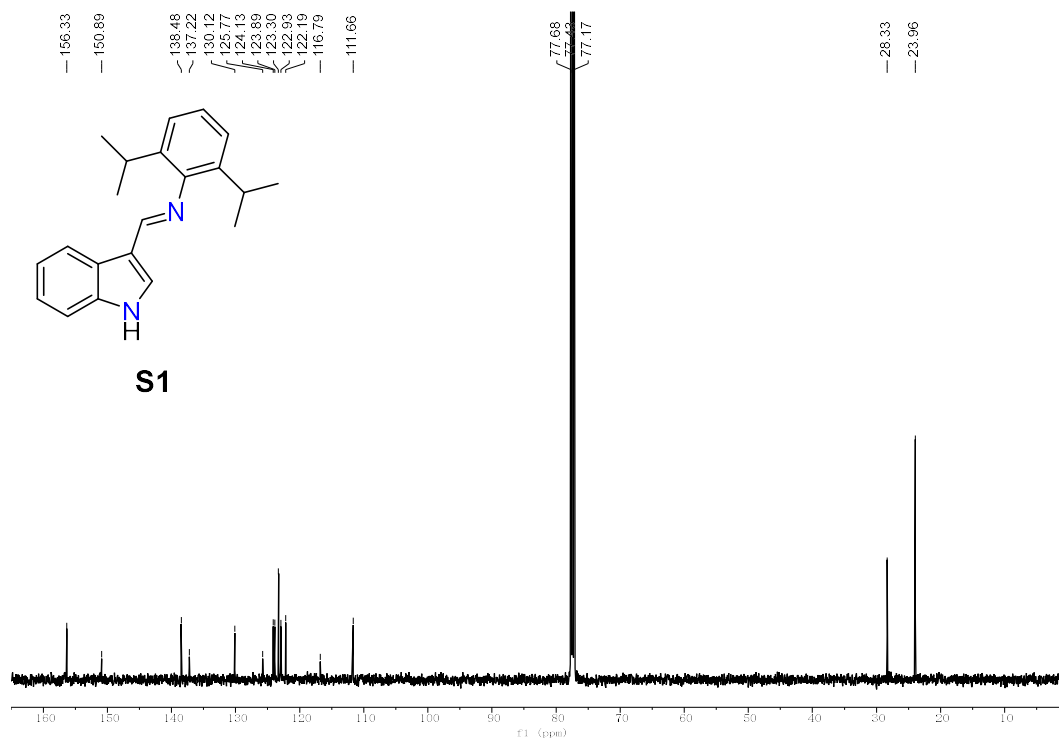

**Fig. S2.**  $^{13}\text{C}\{^1\text{H}\}$  NMR spectrum of **S1** (125 MHz,  $\text{CDCl}_3$ , 298 K)

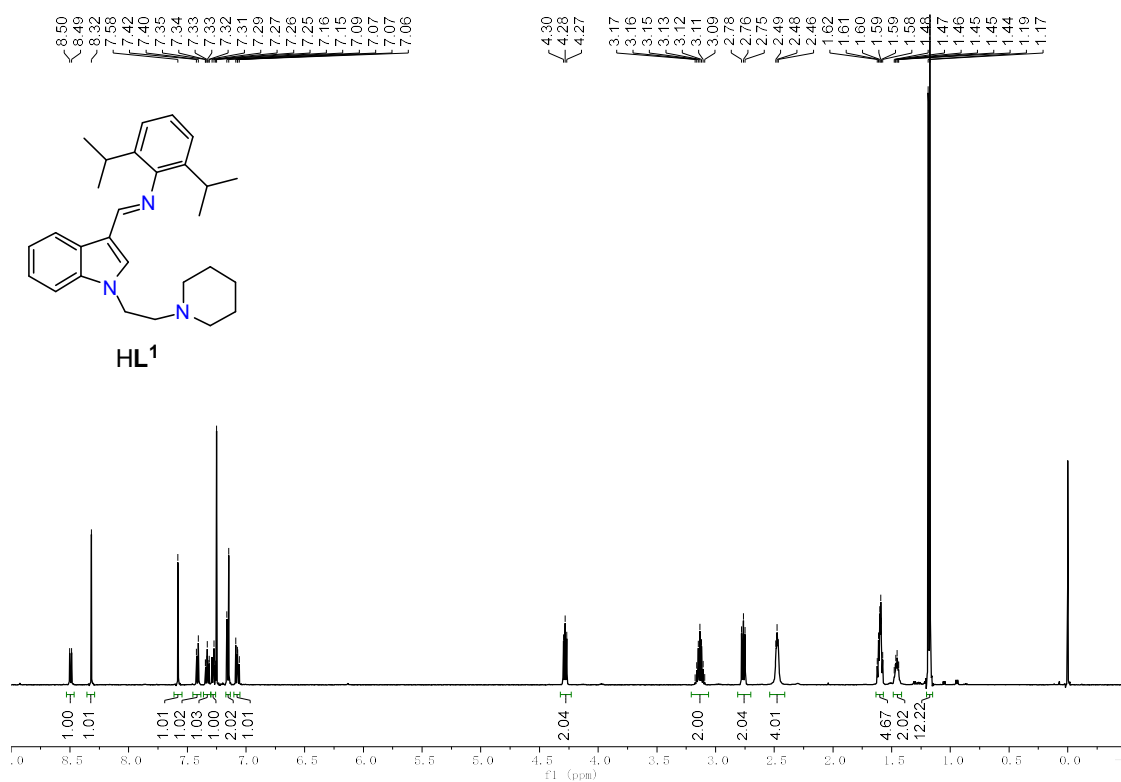

**Fig. S3.**  $^1\text{H}$  NMR spectrum of **HL<sup>1</sup>** (500 MHz,  $\text{CDCl}_3$ , 298 K)



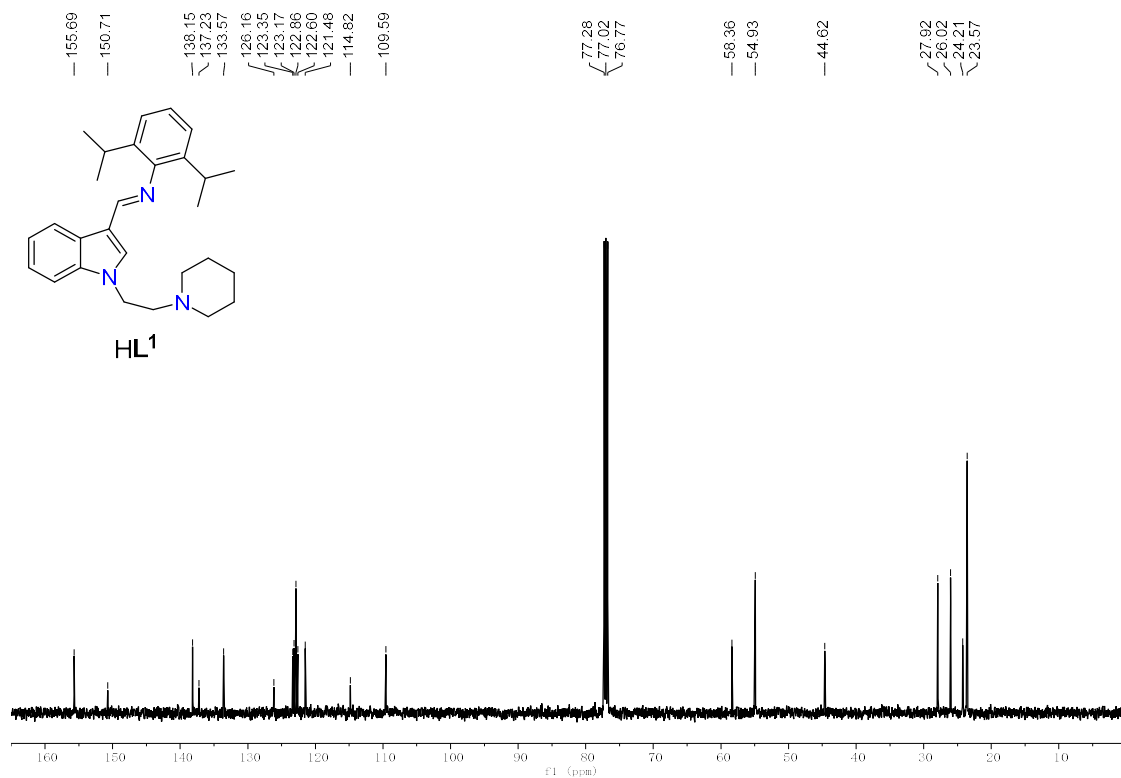

Fig. S4.  $^{13}\text{C}\{^1\text{H}\}$  NMR spectrum of HL<sup>1</sup> (125 MHz,  $\text{CDCl}_3$ , 298 K)

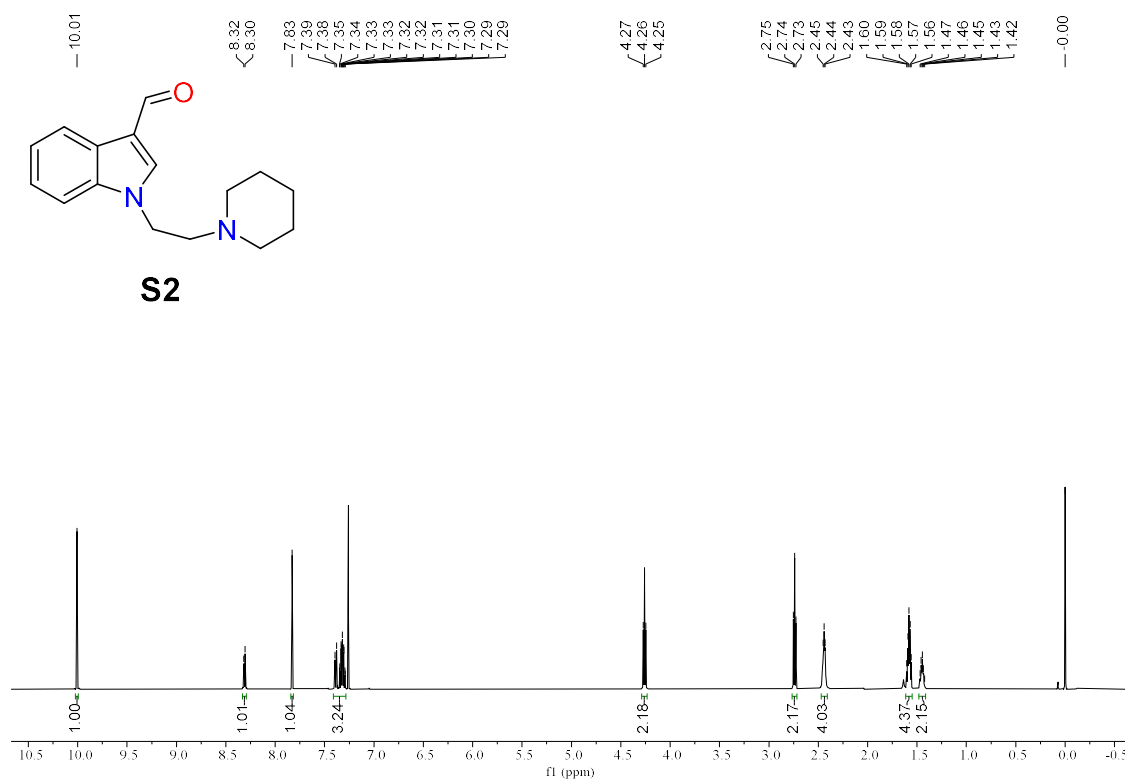

Fig. S5.  $^1\text{H}$  NMR spectrum of S<sub>2</sub> (500 MHz,  $\text{CDCl}_3$ , 298 K)

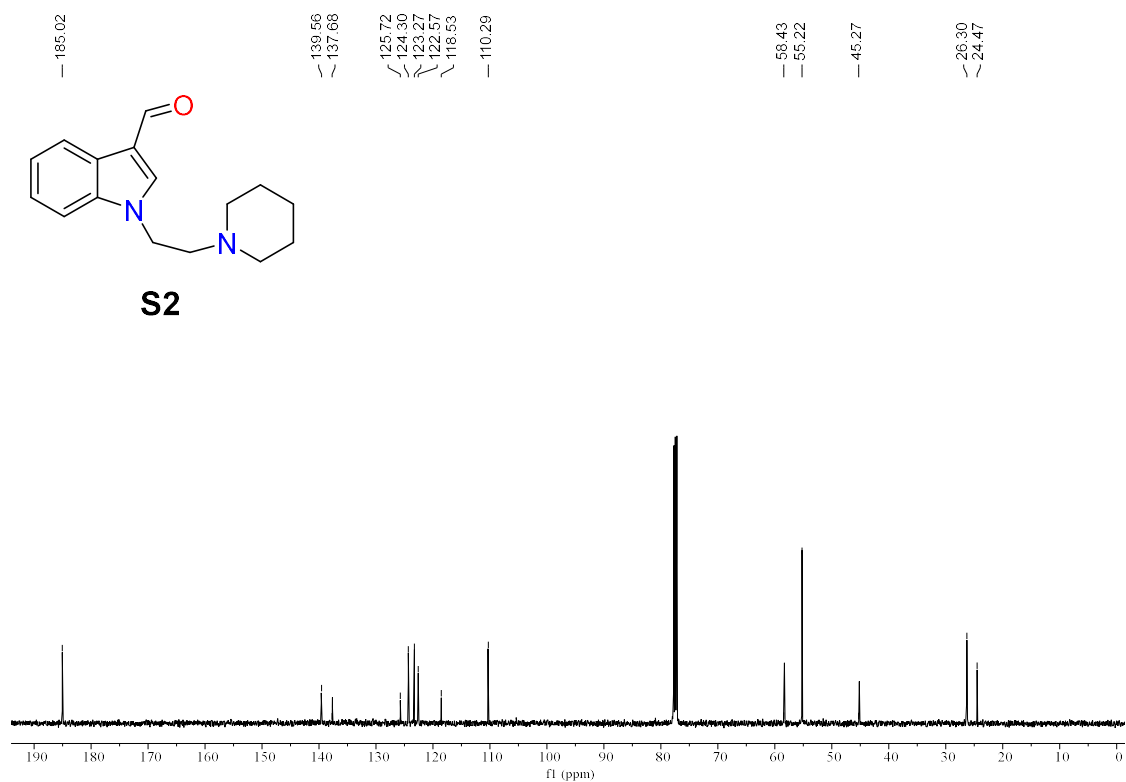

**Fig. S6.**  $^{13}\text{C}\{^1\text{H}\}$  NMR spectrum of **S2** (125 MHz,  $\text{CDCl}_3$ , 298 K)

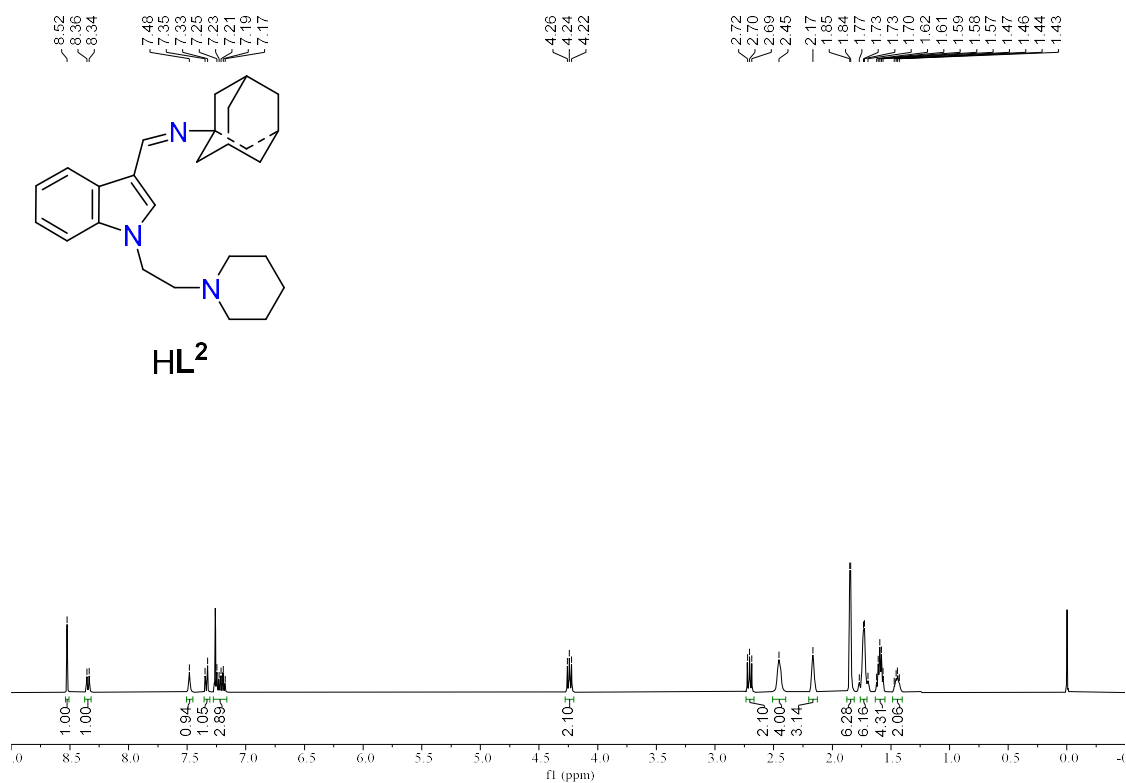

**Fig. S7.**  $^1\text{H}$  NMR spectrum of **HL<sup>2</sup>** (500 MHz,  $\text{CDCl}_3$ , 298 K)

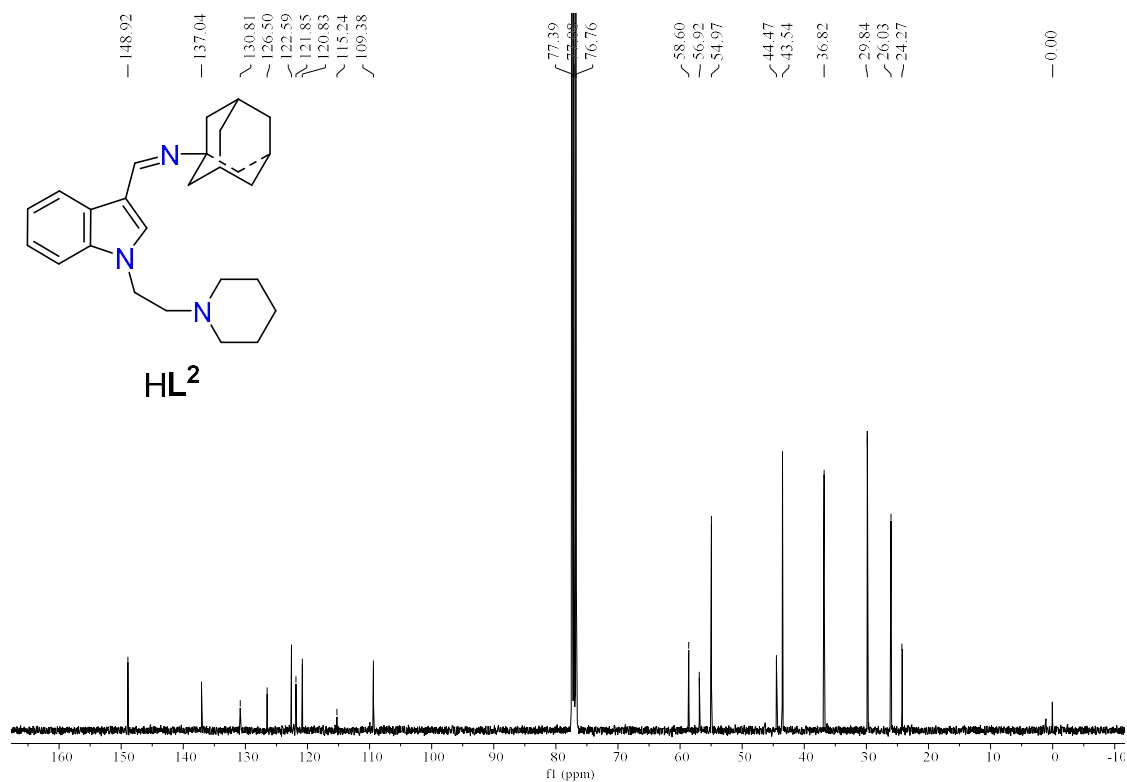

Fig. S8. <sup>13</sup>C{<sup>1</sup>H} NMR spectrum of **HL<sup>2</sup>** (125 MHz, CDCl<sub>3</sub>, 298 K)

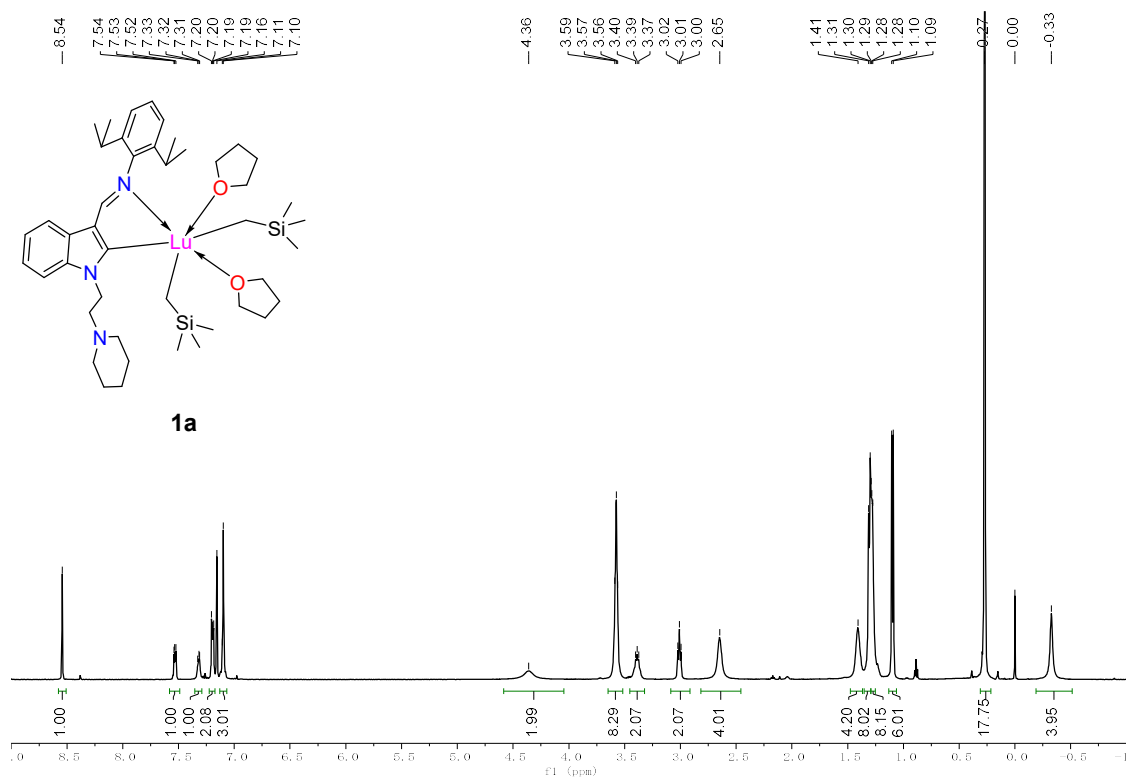

Fig. S9. <sup>1</sup>H NMR spectrum of **1a** (500 MHz, C<sub>6</sub>D<sub>6</sub>, 298 K)

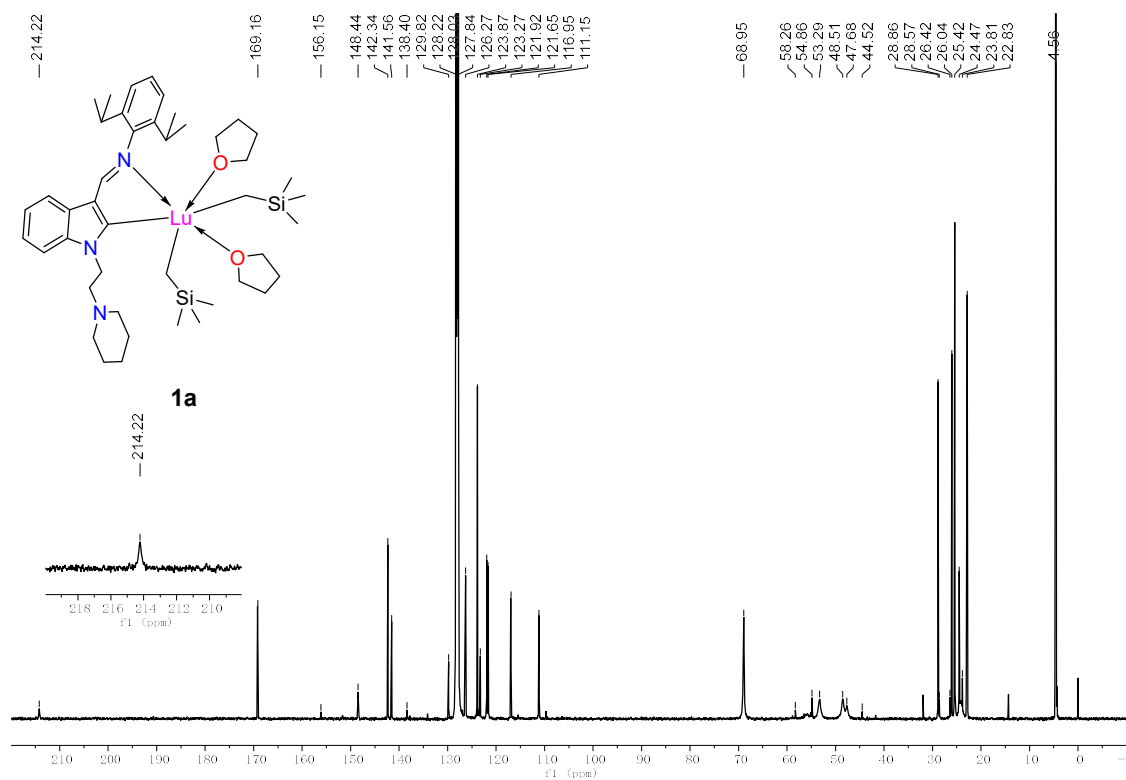

Fig. S10.  $^{13}\text{C}\{^1\text{H}\}$  NMR spectrum of **1a** (125 MHz,  $\text{C}_6\text{D}_6$ , 298 K)

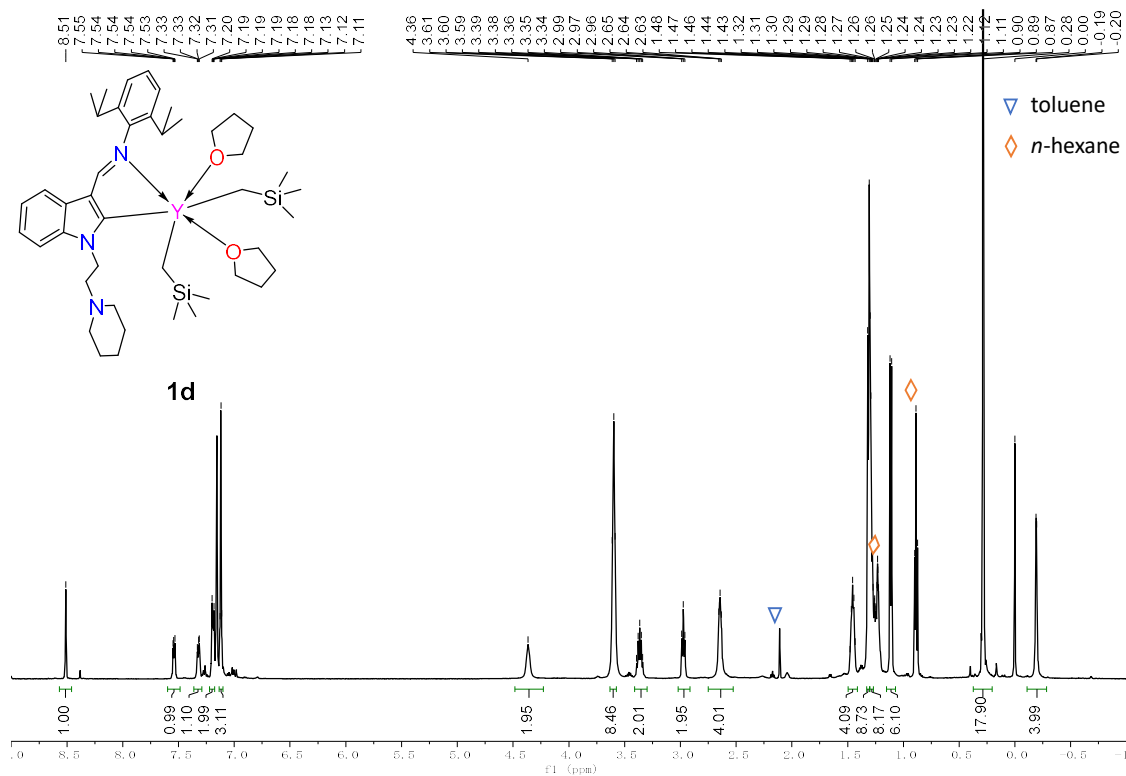

Fig. S11.  $^1\text{H}$  NMR spectrum of **1d** (500 MHz,  $\text{C}_6\text{D}_6$ , 298 K)

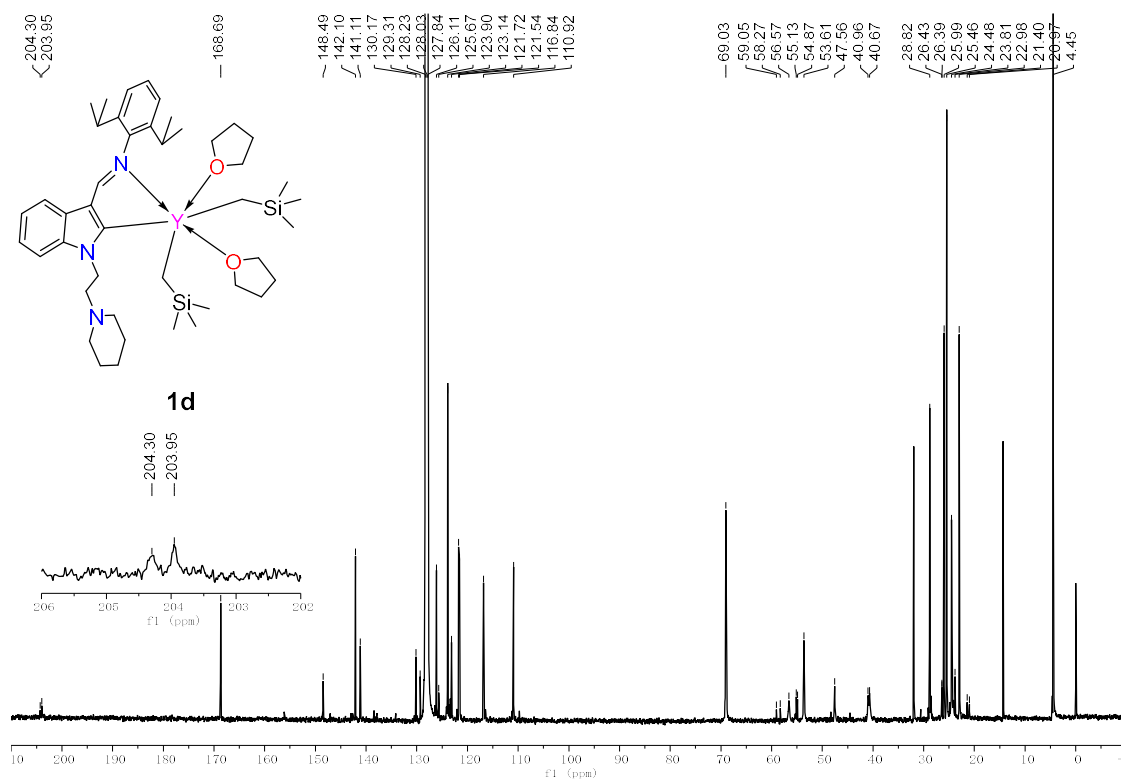

Fig. S12.  $^{13}\text{C}\{^1\text{H}\}$  NMR spectrum of **1d** (125 MHz,  $\text{C}_6\text{D}_6$ , 298 K)

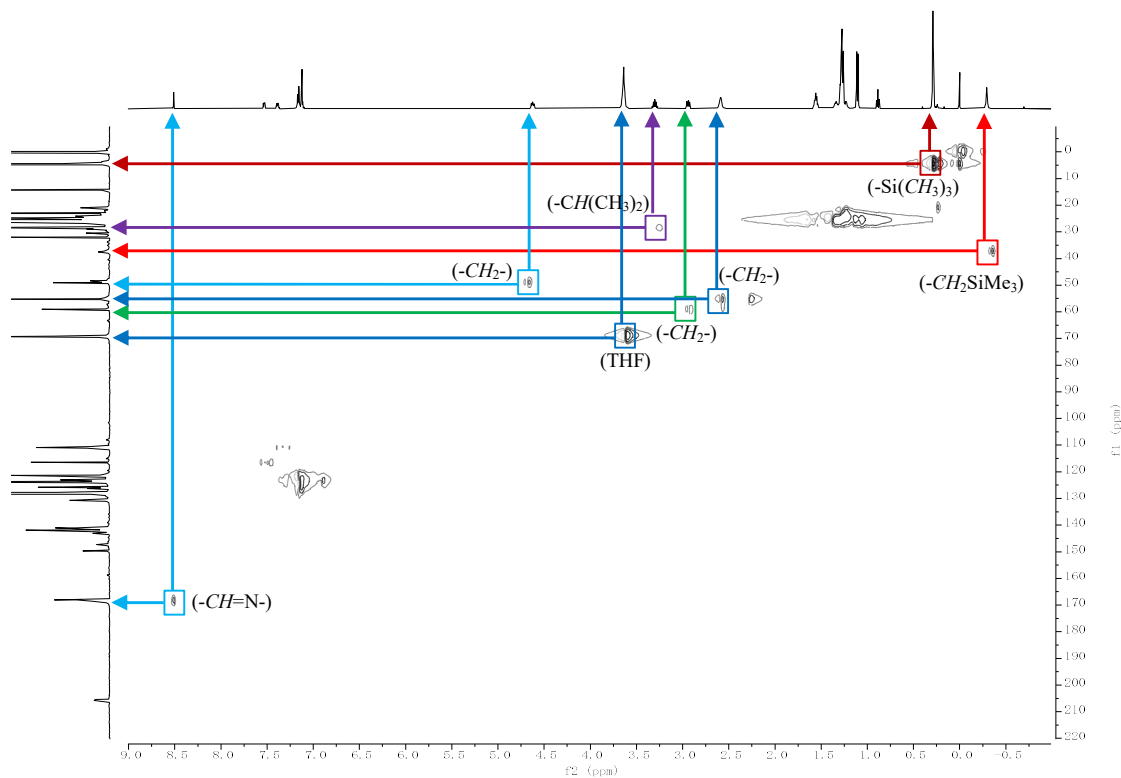

Fig. S13. 2D HSQC NMR spectrum of **1d** ( $\text{C}_6\text{D}_6$ , 298 K)

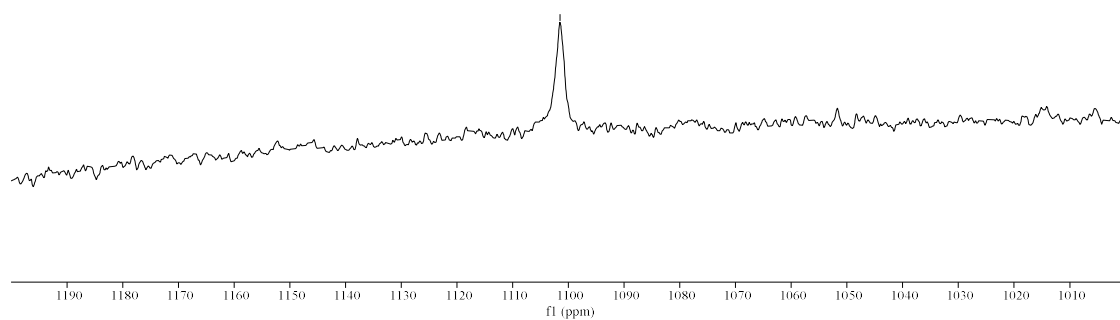

**Fig. S14.**  $^{89}\text{Y}$  NMR spectrum of **1d** (24.5 MHz,  $\text{C}_6\text{D}_6$ , 298 K)

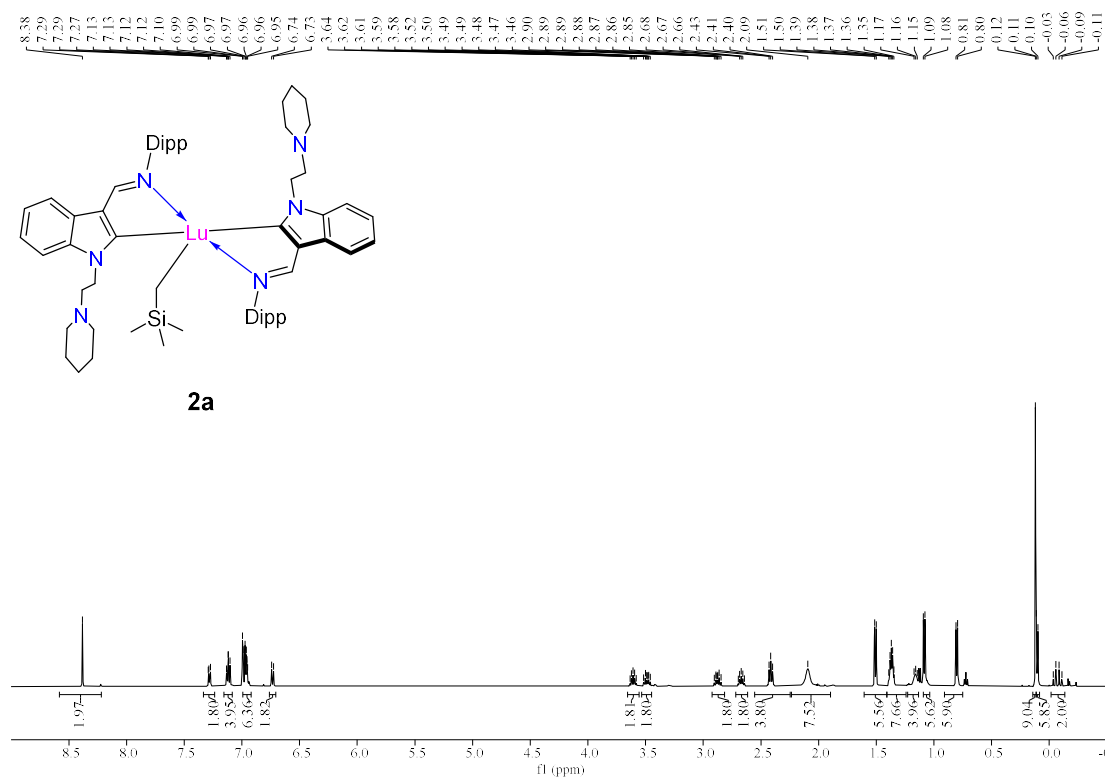

**Fig. S15.**  $^1\text{H}$  NMR spectrum of **2a** (500 MHz,  $\text{C}_6\text{D}_6$ , 298 K)

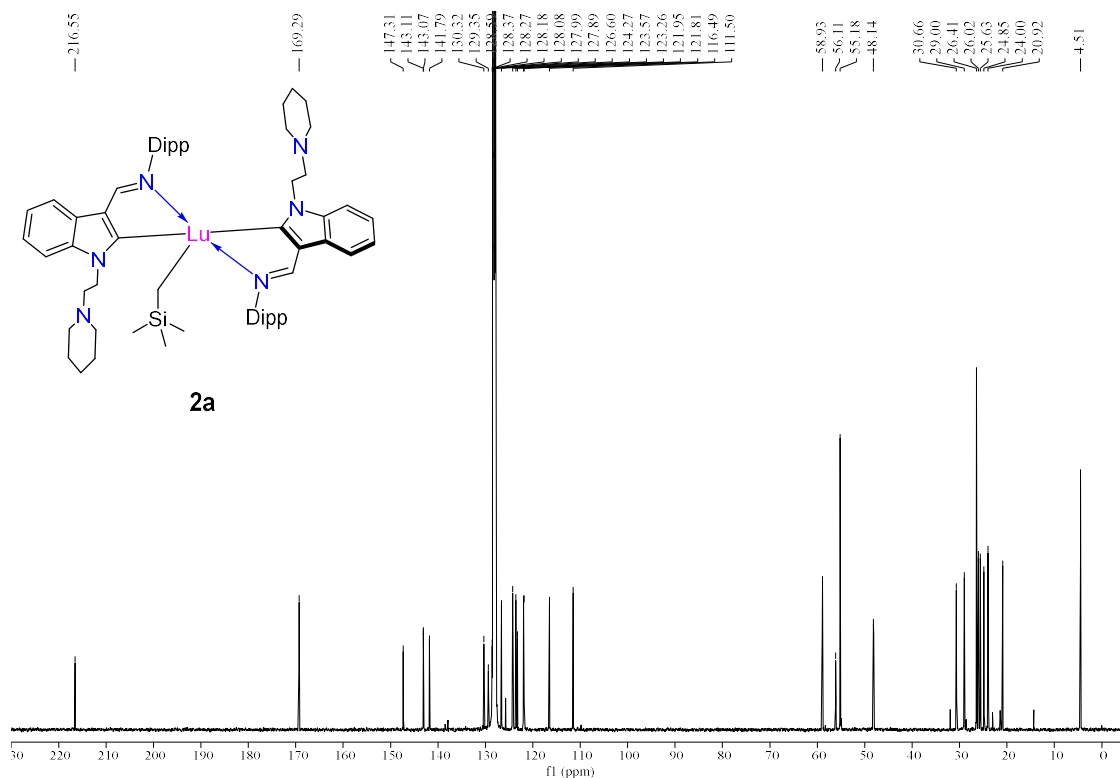

**Fig. S16.**  $^{13}\text{C}\{^1\text{H}\}$  NMR spectrum of **2a** (125 MHz,  $\text{C}_6\text{D}_6$ , 298 K)

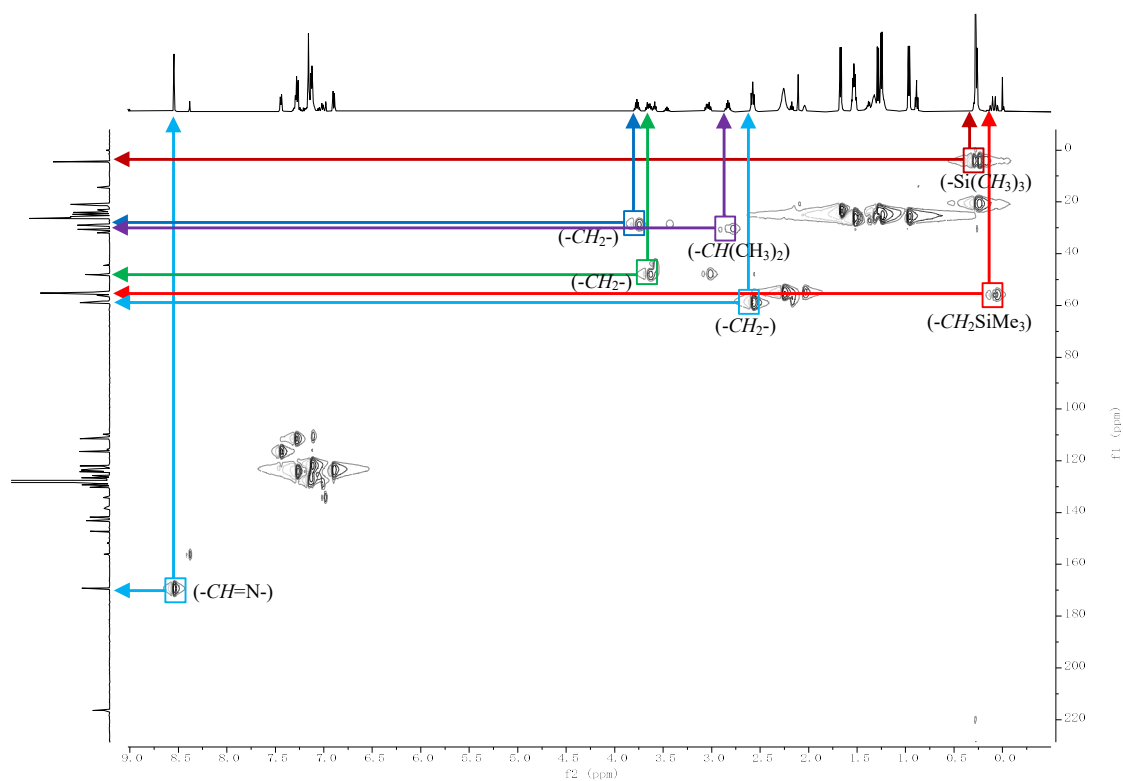

**Fig. S17.** 2D HSQC NMR spectrum of **2a** ( $\text{C}_6\text{D}_6$ , 298 K)

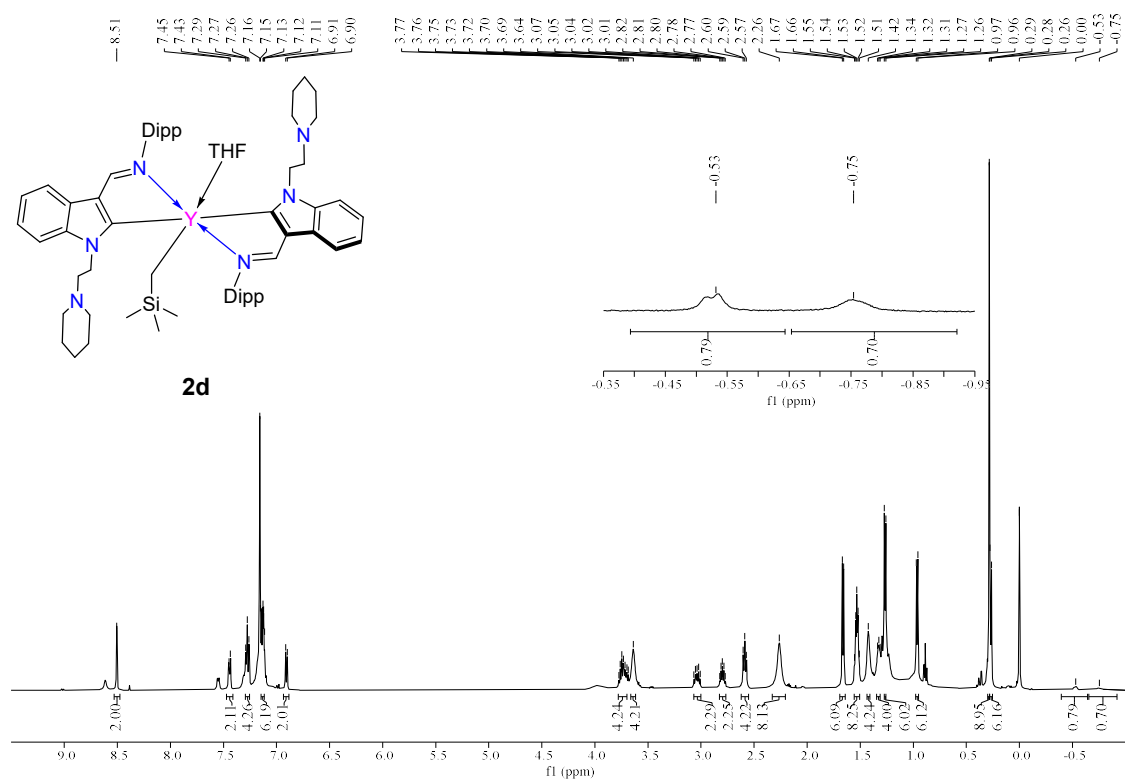

**Fig. S18.** <sup>1</sup>H NMR spectrum of **2d** (500 MHz, C<sub>6</sub>D<sub>6</sub>, 298 K)

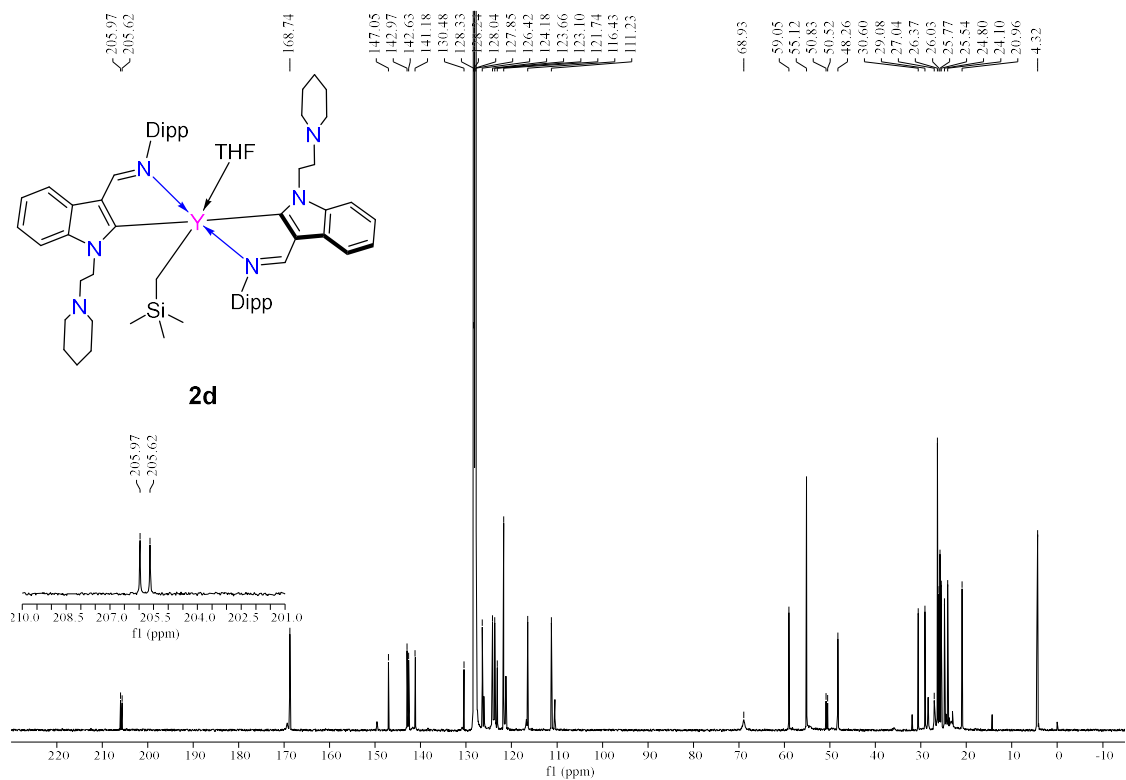

**Fig. S19.** <sup>13</sup>C {<sup>1</sup>H} NMR spectrum of **2d** (125 MHz, C<sub>6</sub>D<sub>6</sub>, 298 K)



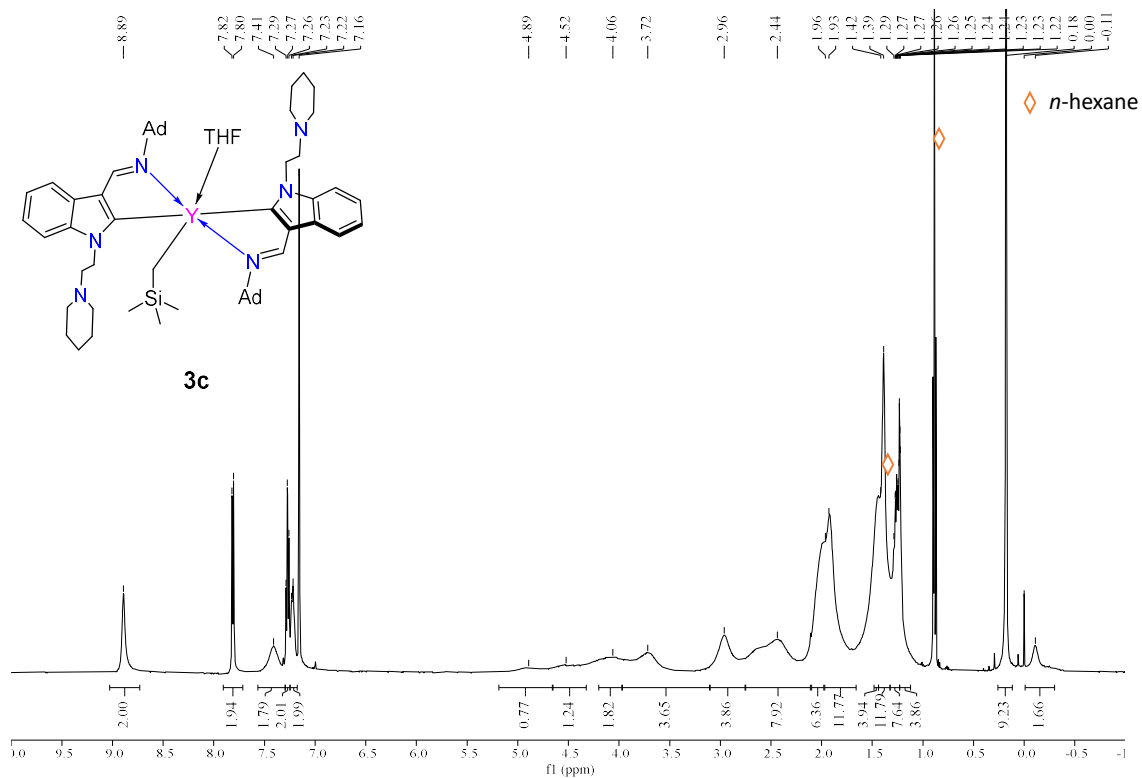

**Fig. S20.**  $^1\text{H}$  NMR spectrum of **3c** (500 MHz,  $\text{C}_6\text{D}_6$ , 298 K)

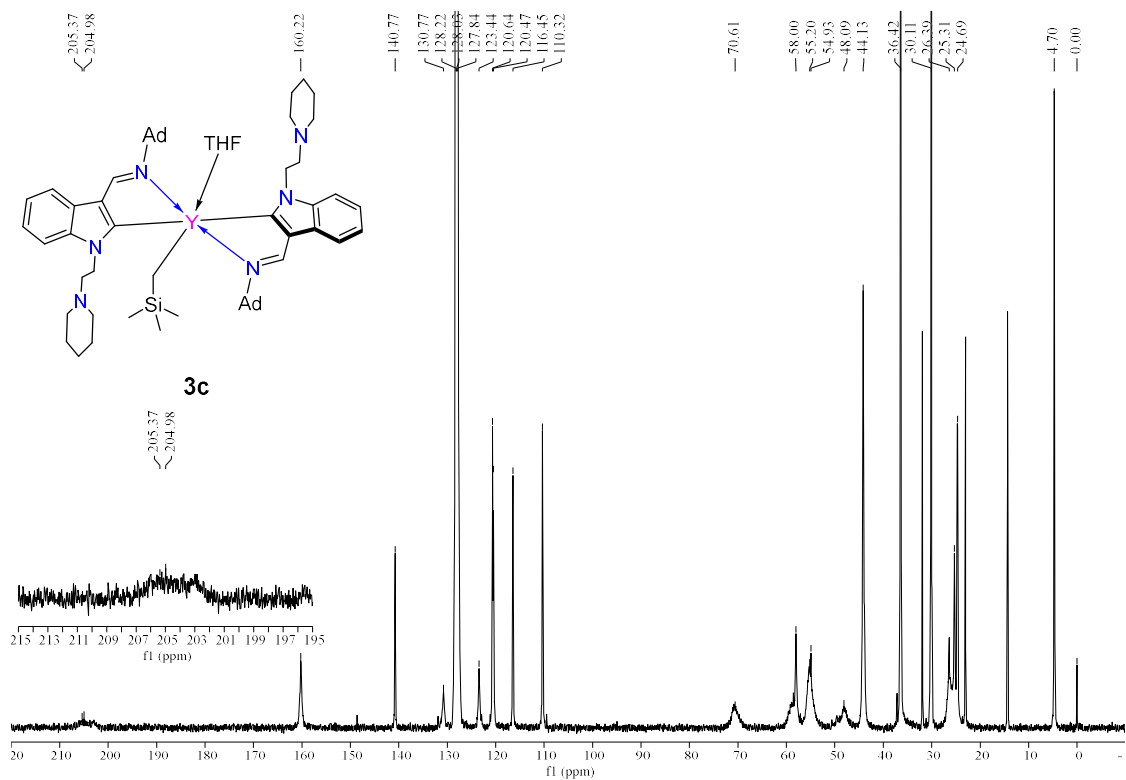

**Fig. S21.**  $^{13}\text{C}\{^1\text{H}\}$  NMR spectrum of **3c** (125 MHz,  $\text{C}_6\text{D}_6$ , 298 K)

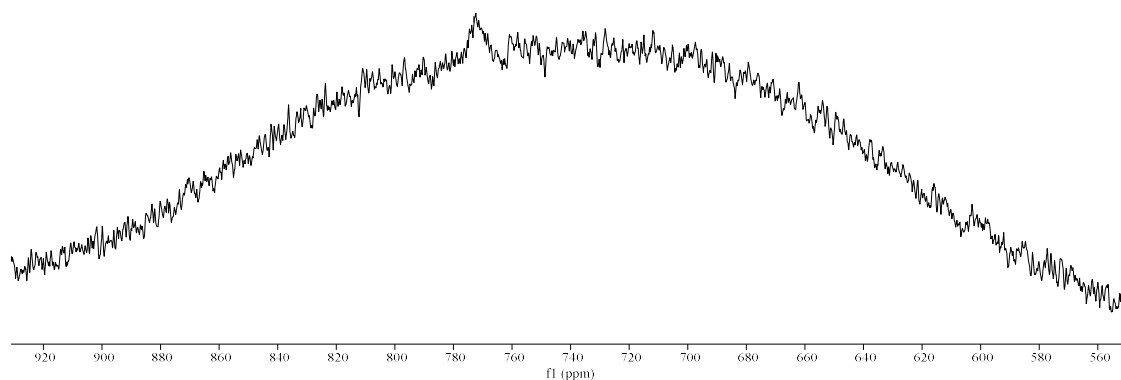

**Fig. S22.**  $^{89}\text{Y}$  NMR spectrum of **3c** (24.5 MHz,  $\text{C}_6\text{D}_6$ , 298 K) (scanning for 4 hours)

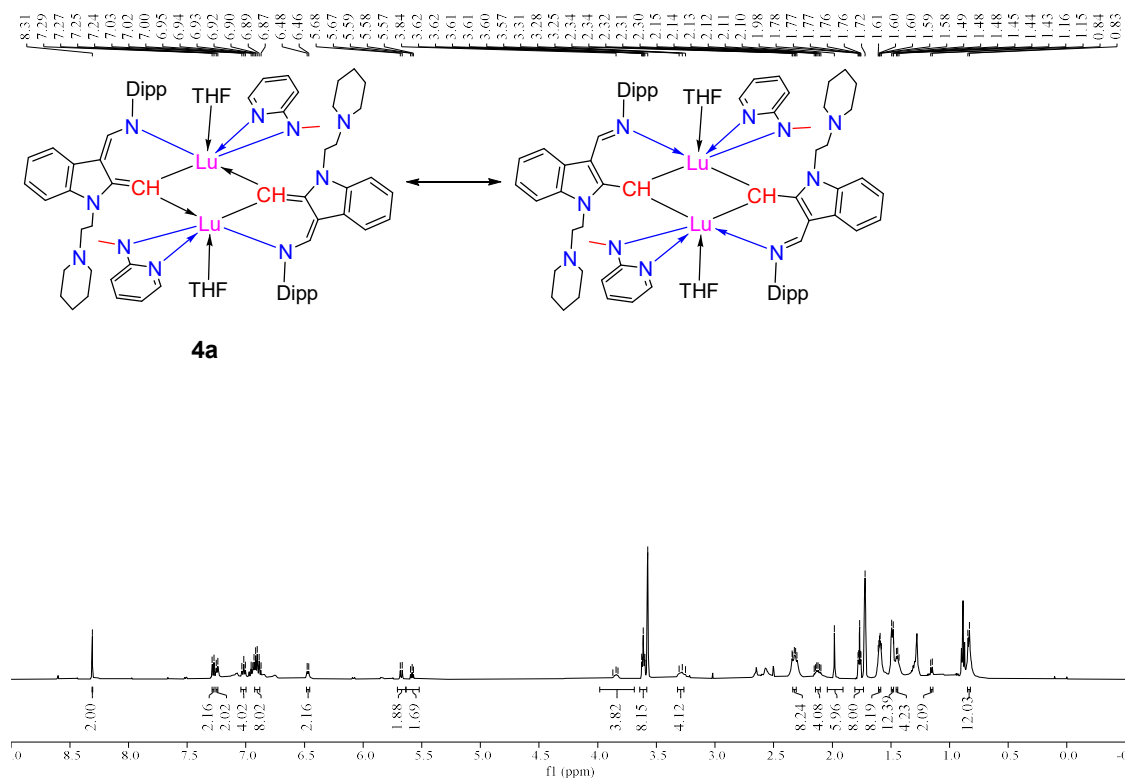

**Fig. S23.**  $^1\text{H}$  NMR spectrum of **4a** (500 MHz,  $\text{THF-}d_8$ , 298 K)

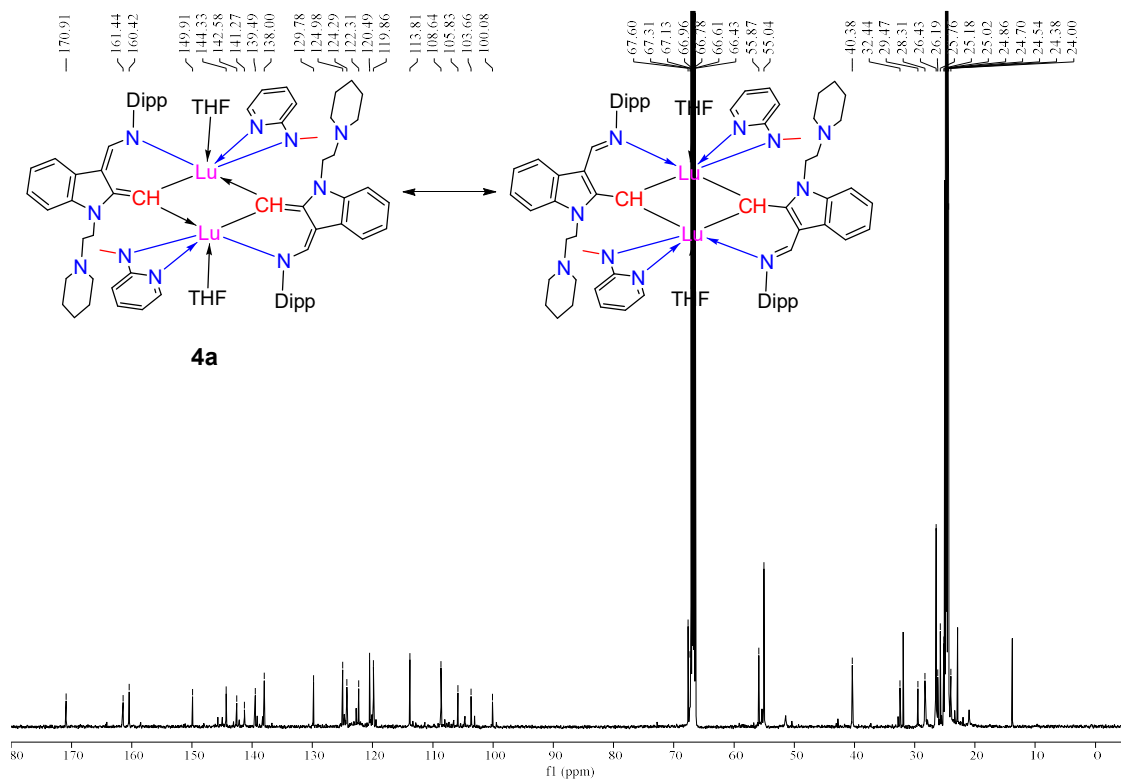

**Fig. S24.**  $^{13}\text{C}\{^1\text{H}\}$  NMR spectrum of **4a** (125 MHz, THF- $d_8$ , 298 K)

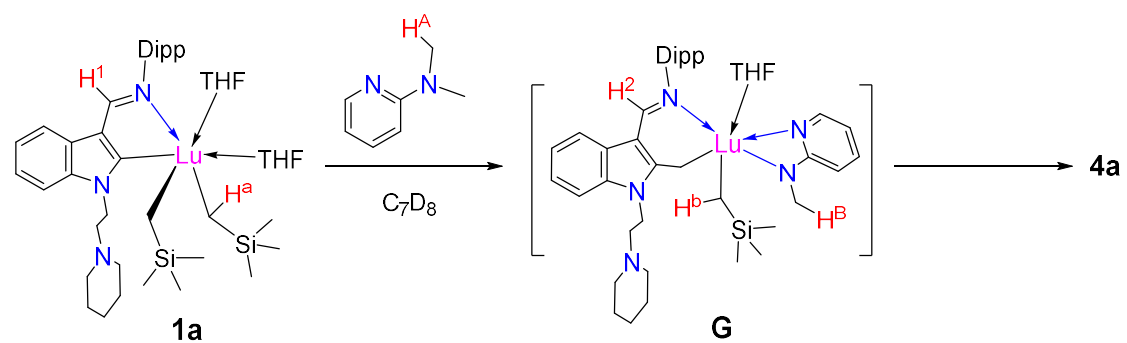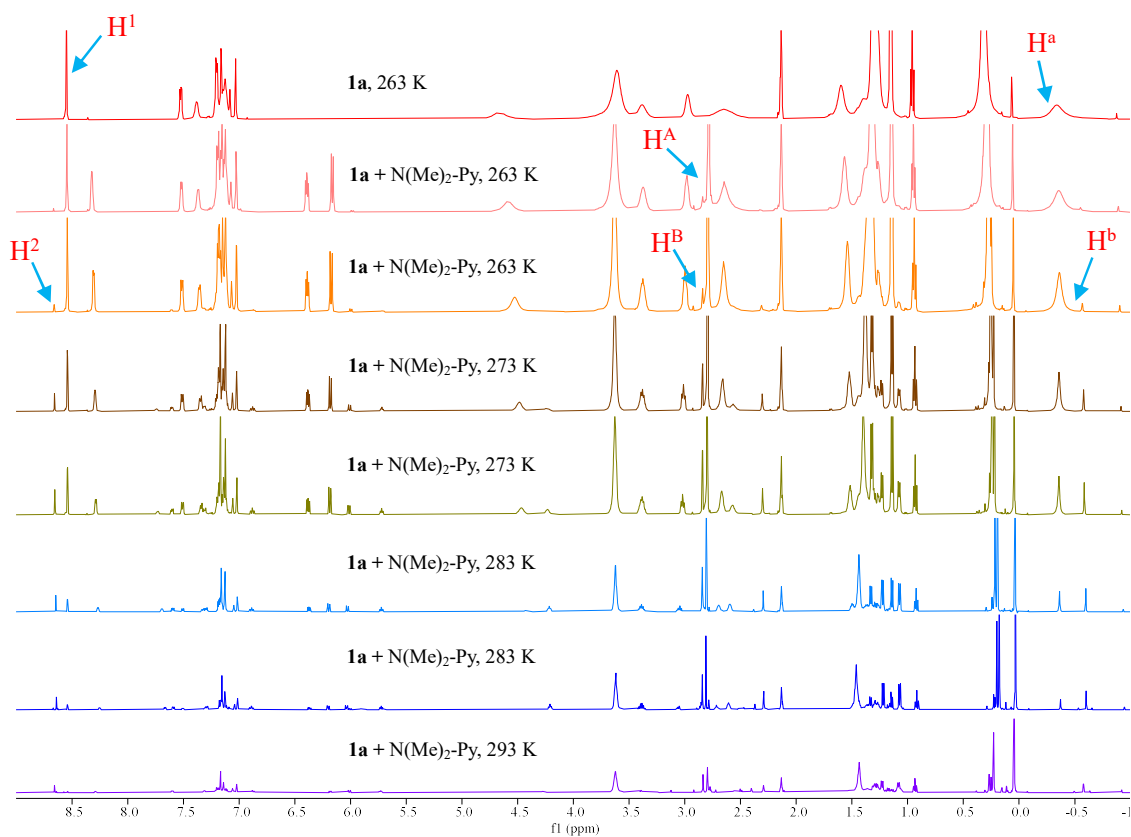

**Fig. S25.** VT-NMR ( $C_7D_8$ ) spectrum of **1a** with 2-*N,N*-dimethylaminopyridine from 263 K to 293 K

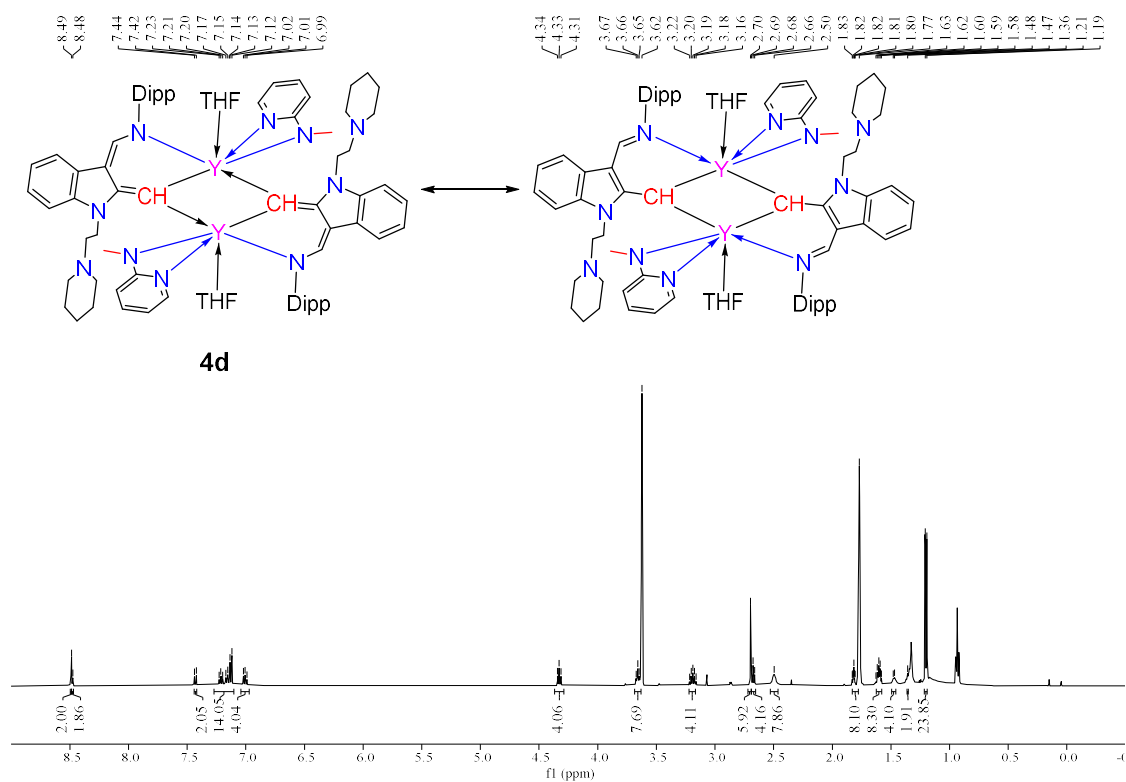

Fig. S26.  $^1\text{H}$  NMR spectrum of **4d** (500 MHz,  $\text{THF-}d_8$ , 298 K)

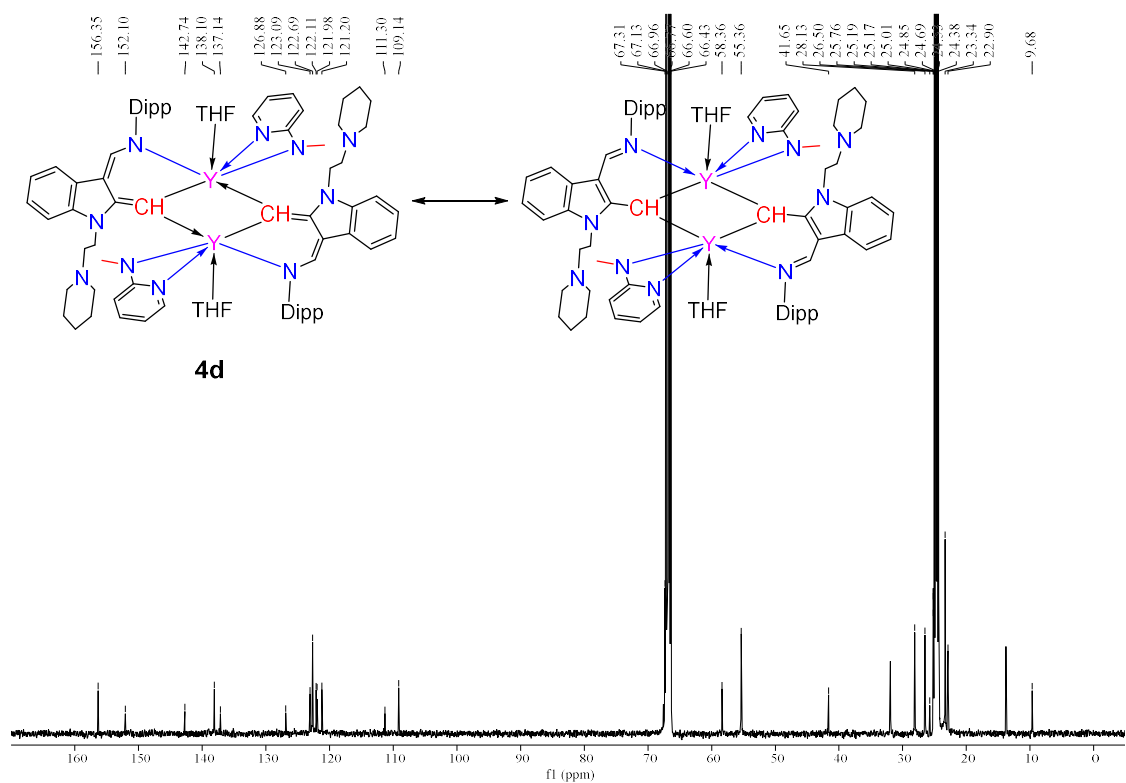

Fig. S27.  $^{13}\text{C}\{^1\text{H}\}$  NMR spectrum of **4d** (125 MHz,  $\text{THF-}d_8$ , 298 K)

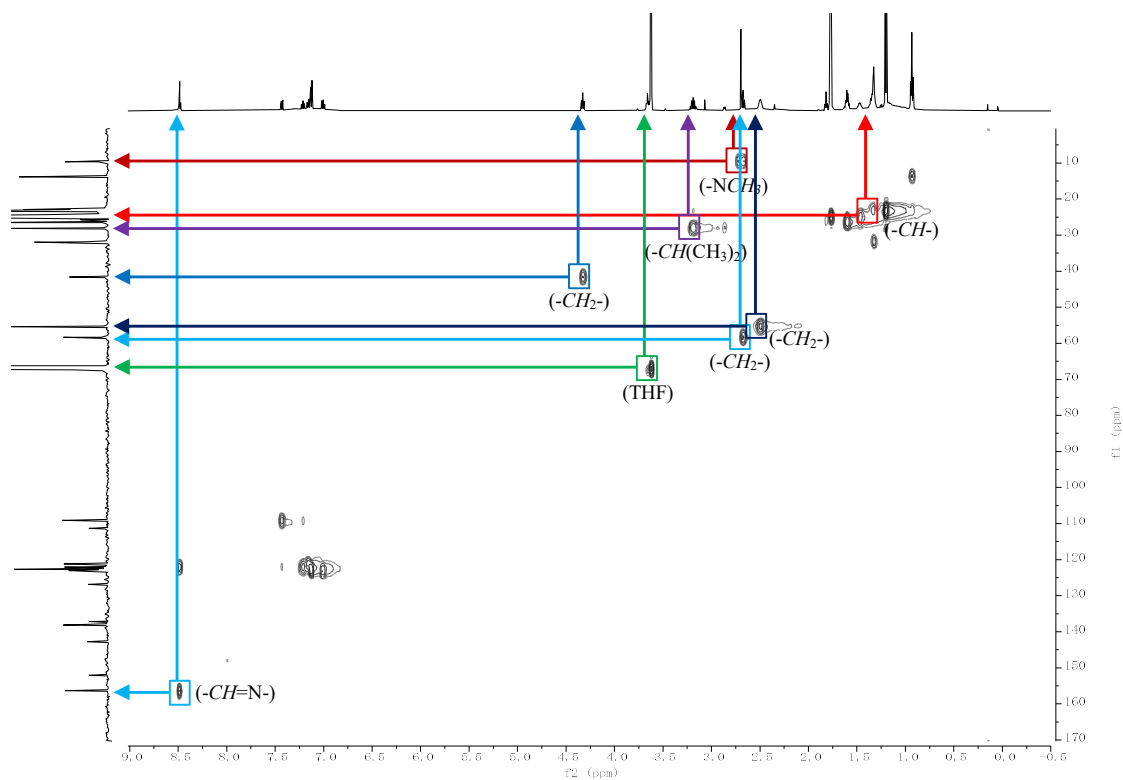

**Fig. S28.** 2D HSQC NMR spectrum of **4d** (THF- $d_8$ , 298 K)

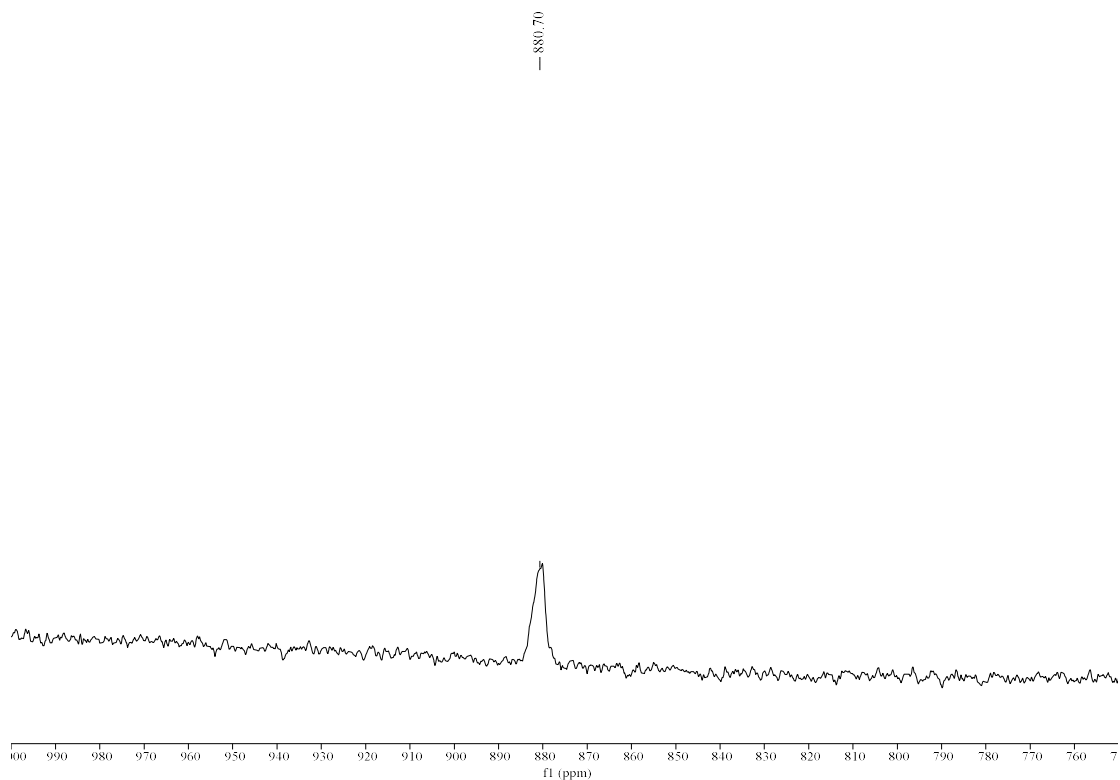

**Fig. S29.**  $^{89}\text{Y}$  NMR spectrum of **4d** (24.5 MHz, THF- $d_8$ , 298 K)

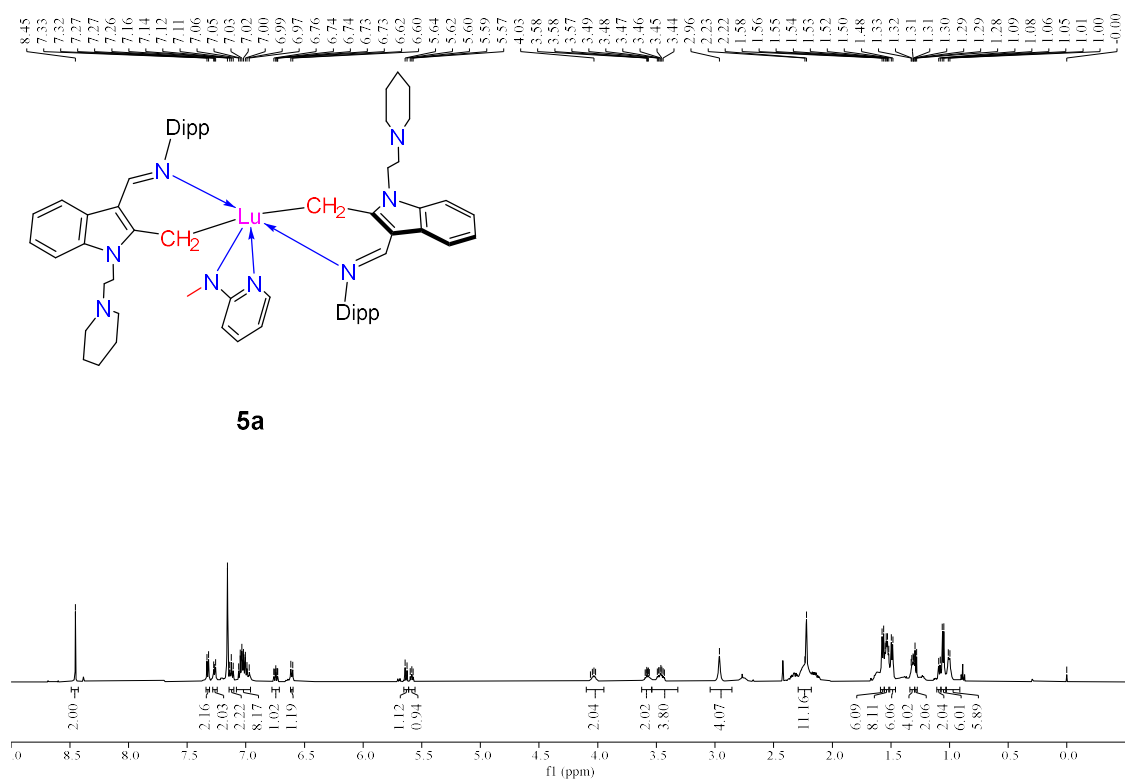

**Fig. S30.**  $^1\text{H}$  NMR spectrum of **5a** (500 MHz,  $\text{C}_6\text{D}_6$ , 298 K)

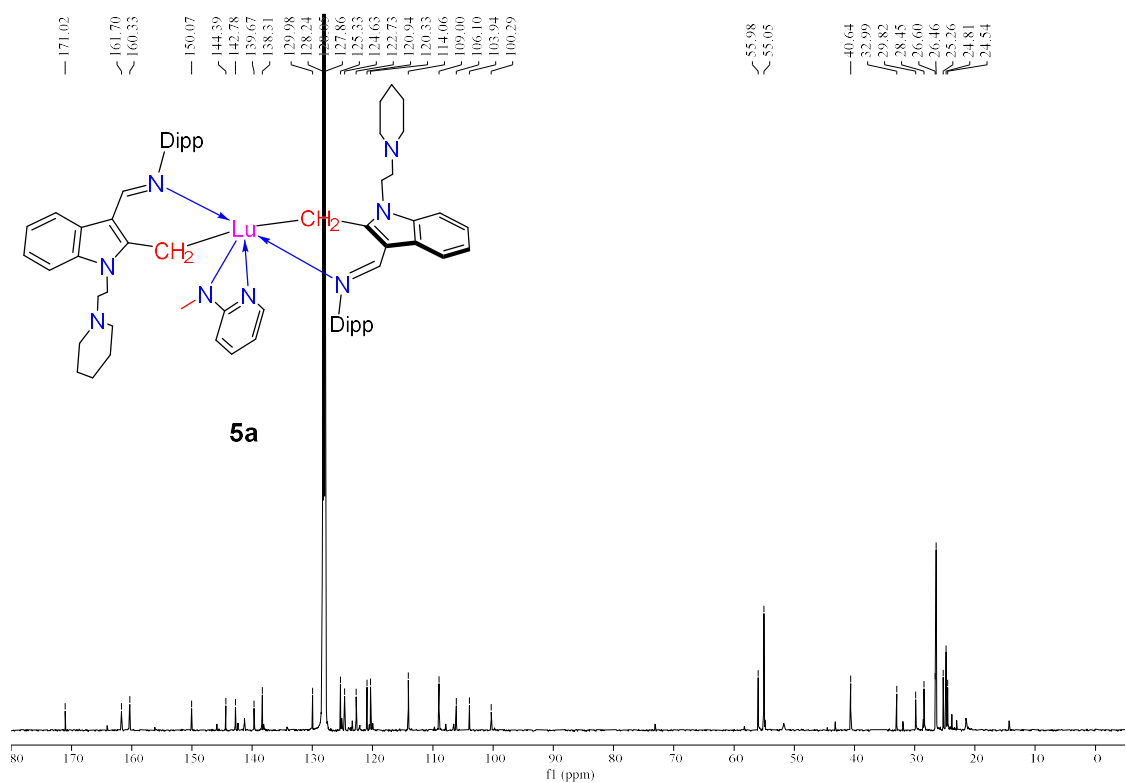

**Fig. S31.**  $^{13}\text{C}\{^1\text{H}\}$  NMR spectrum of **5a** (125 MHz,  $\text{C}_6\text{D}_6$ , 298 K)

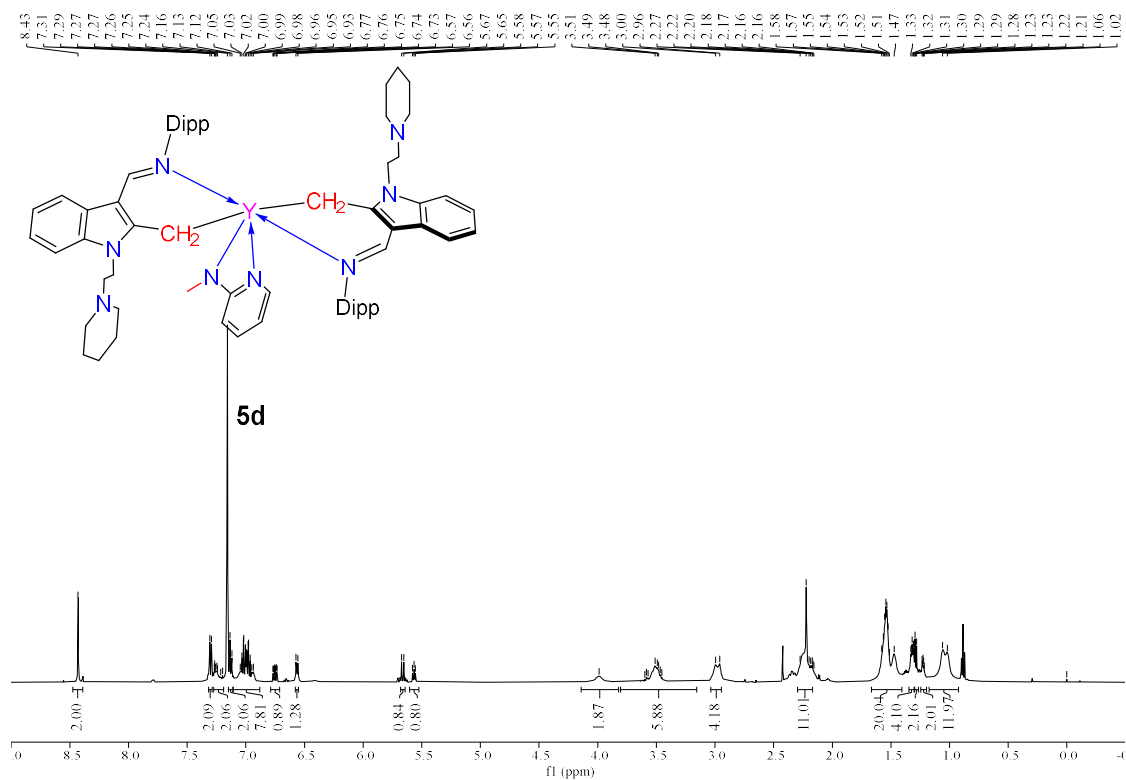

**Fig. S32.** <sup>1</sup>H NMR spectrum of **5d** (500 MHz, C<sub>6</sub>D<sub>6</sub>, 298 K)

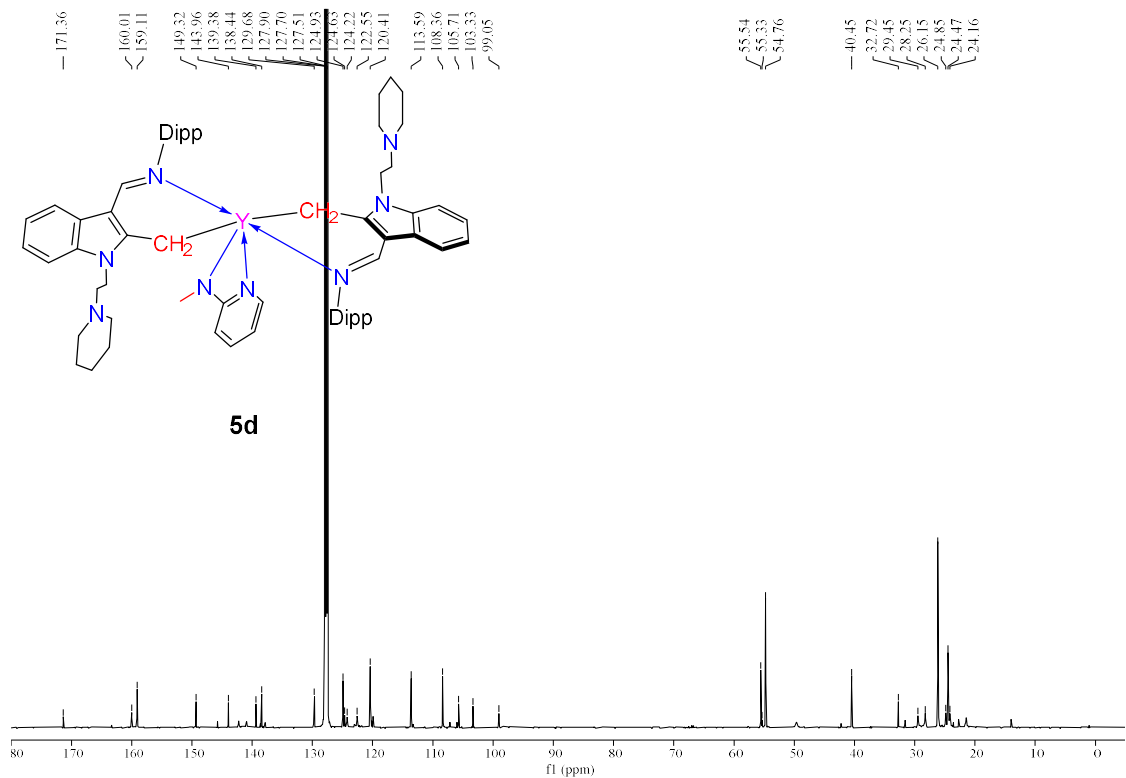

**Fig. S33.** <sup>13</sup>C {<sup>1</sup>H} NMR spectrum of **5d** (125 MHz, C<sub>6</sub>D<sub>6</sub>, 298 K)



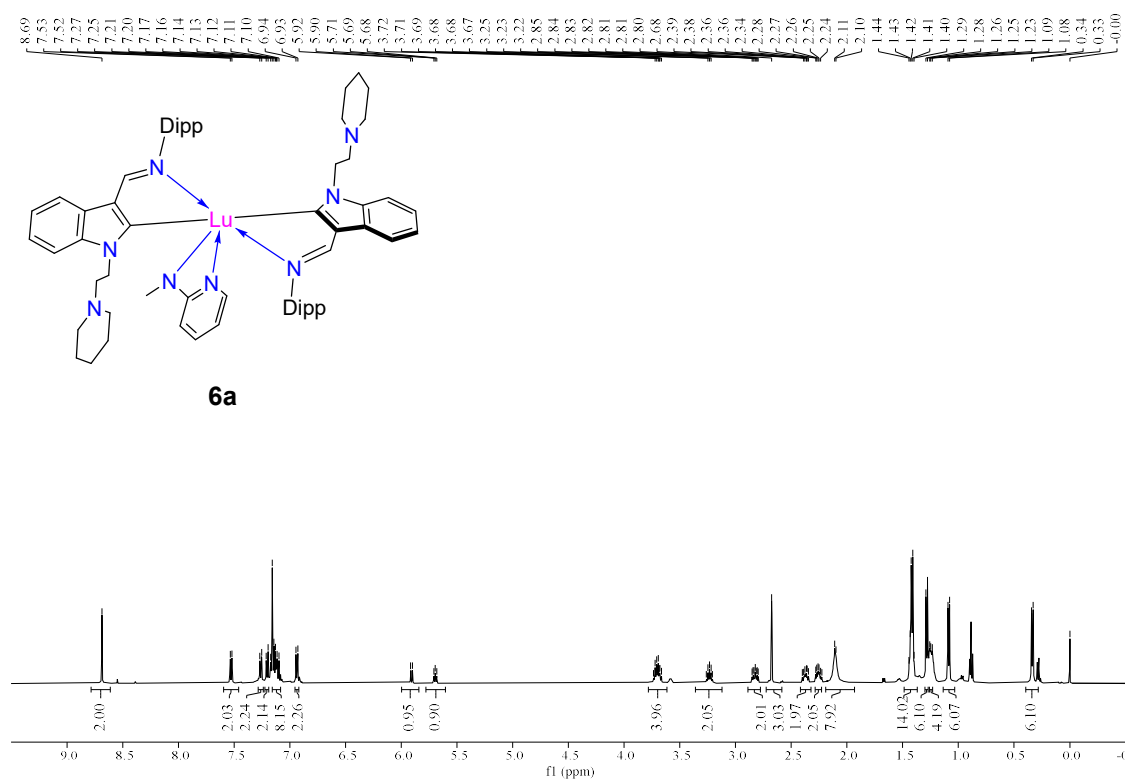

**Fig. S34.**  $^1\text{H}$  NMR spectrum of **6a** (500 MHz,  $\text{C}_6\text{D}_6$ , 298 K)

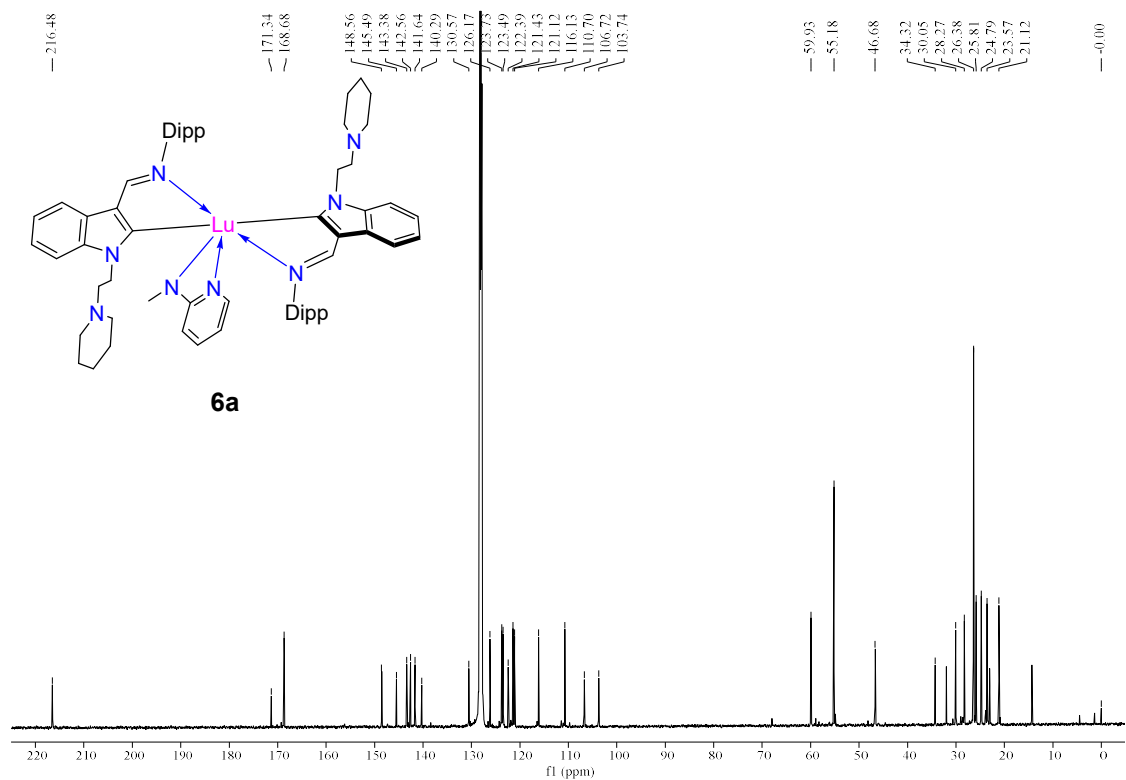

**Fig. S35.**  $^{13}\text{C}\{^1\text{H}\}$  NMR spectrum of **6a** (125 MHz,  $\text{C}_6\text{D}_6$ , 298 K)

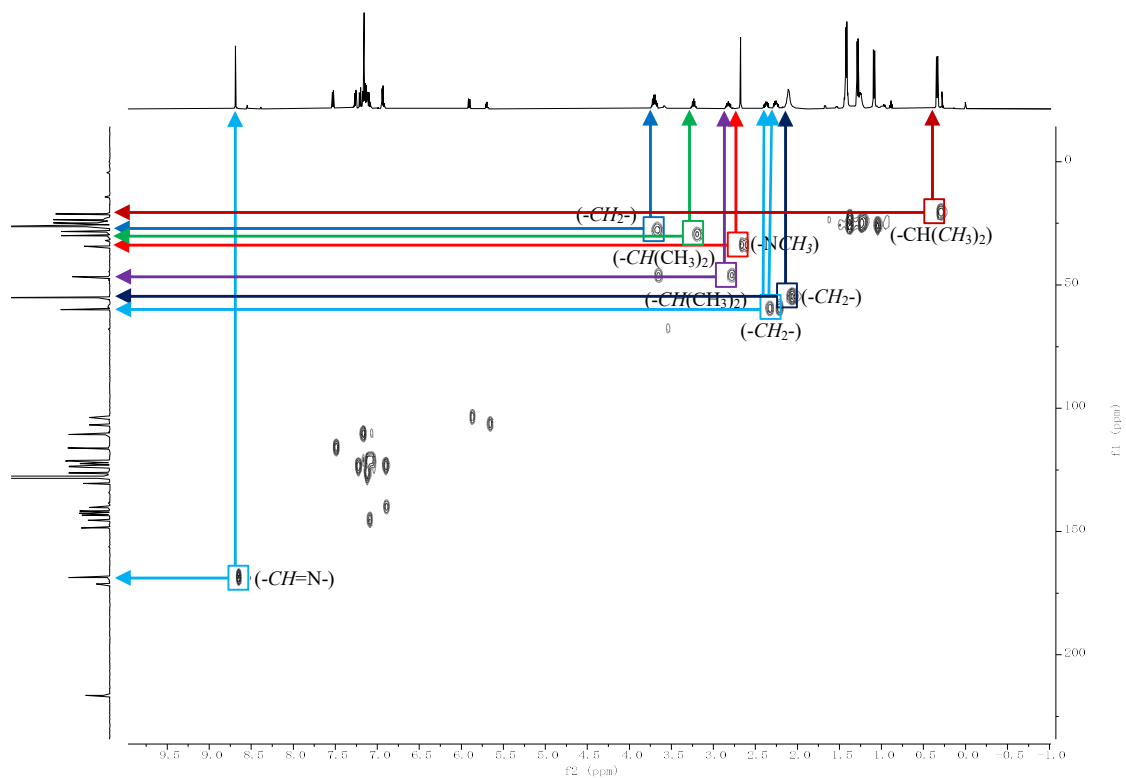

Fig. S36. 2D HSQC NMR spectrum of **6a** ( $C_6D_6$ , 298 K)

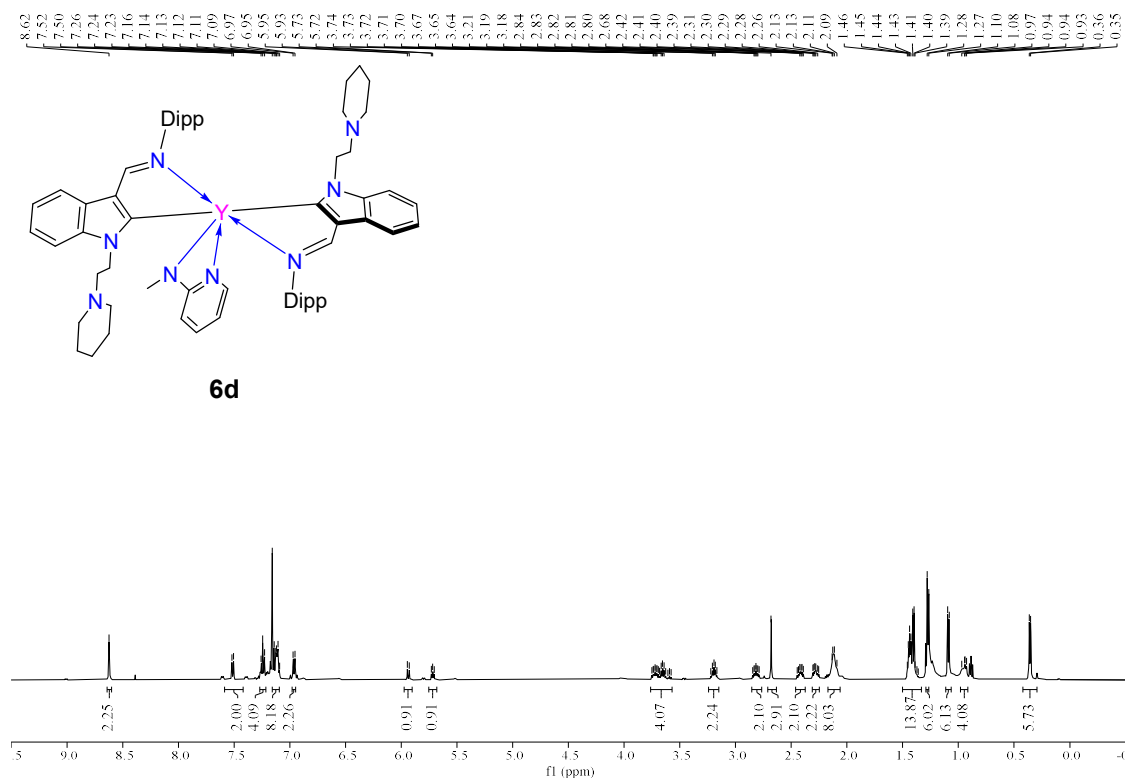

Fig. S37.  $^1H$  NMR spectrum of **6d** (500 MHz,  $C_6D_6$ , 298 K)

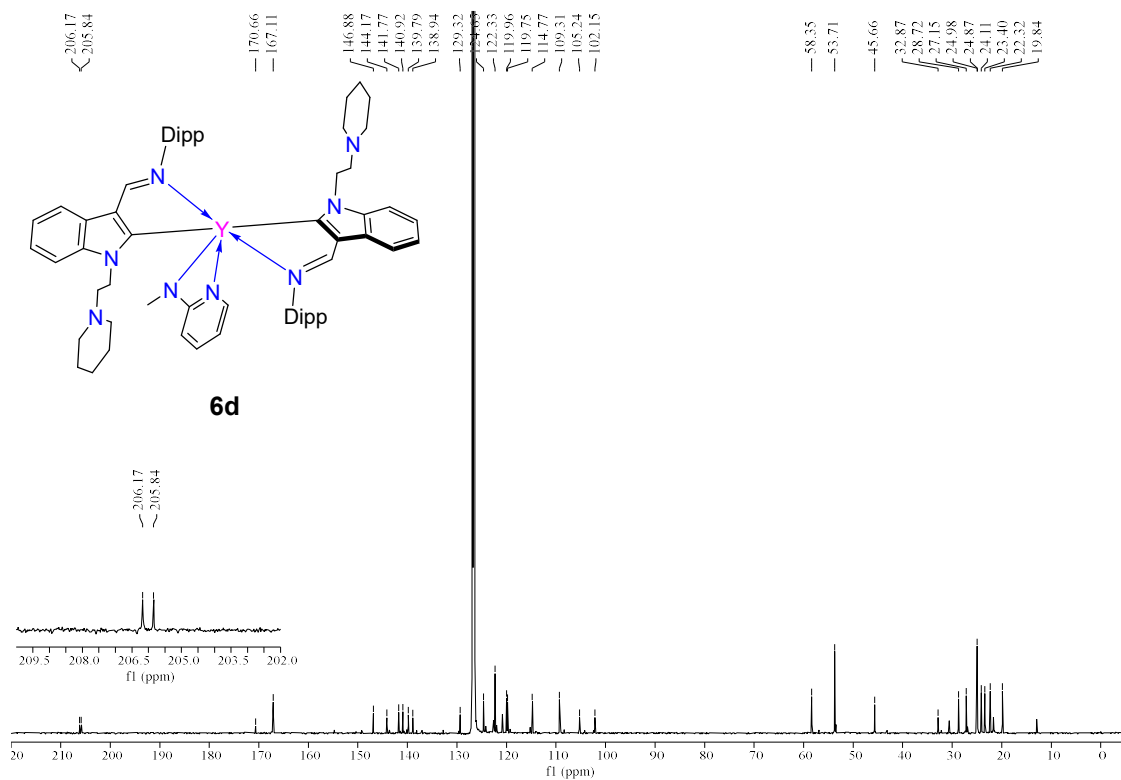

**Fig. S38.**  $^{13}\text{C}\{^1\text{H}\}$  NMR spectrum of **6d** (125 MHz,  $\text{C}_6\text{D}_6$ , 298 K)

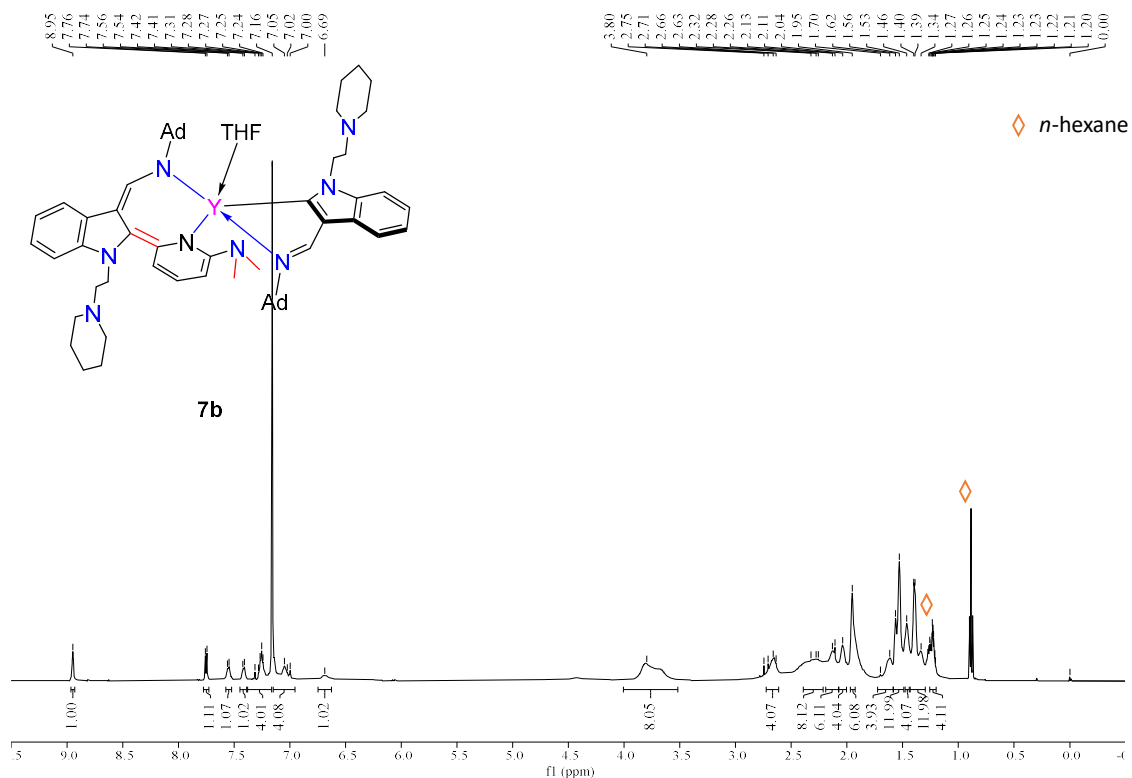

**Fig. S39.**  $^1\text{H}$  NMR spectrum of **7b** (500 MHz,  $\text{C}_6\text{D}_6$ , 298 K)

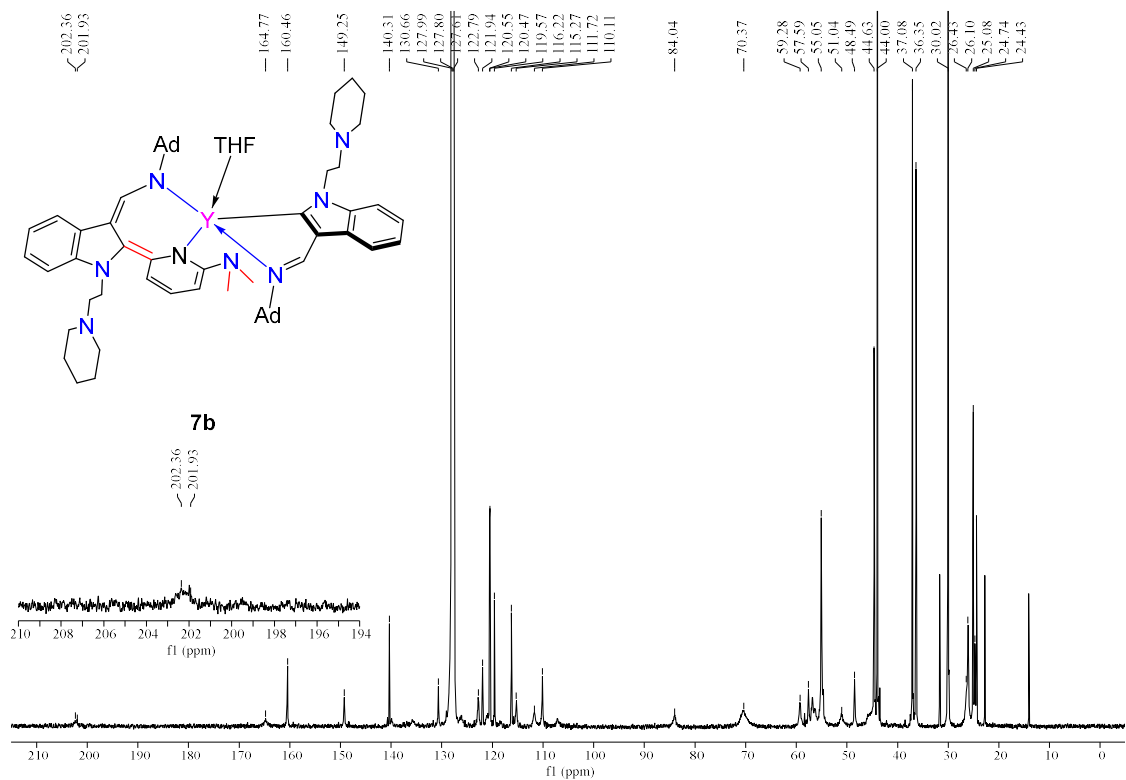

**Fig. S40.**  $^{13}\text{C}\{^1\text{H}\}$  NMR spectrum of **7b** (125 MHz,  $\text{C}_6\text{D}_6$ , 298 K)

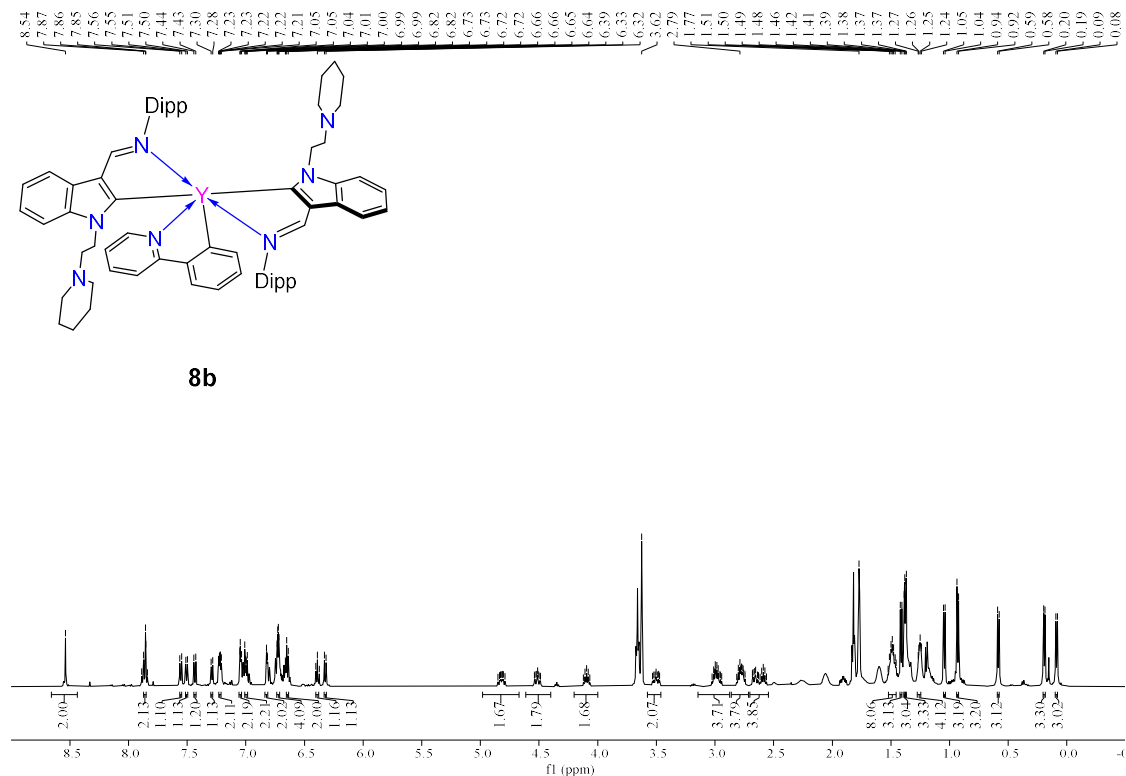

**Fig. S41.**  $^1\text{H}$  NMR spectrum of **8b** (500 MHz,  $\text{THF}-d_8$ , 298 K)

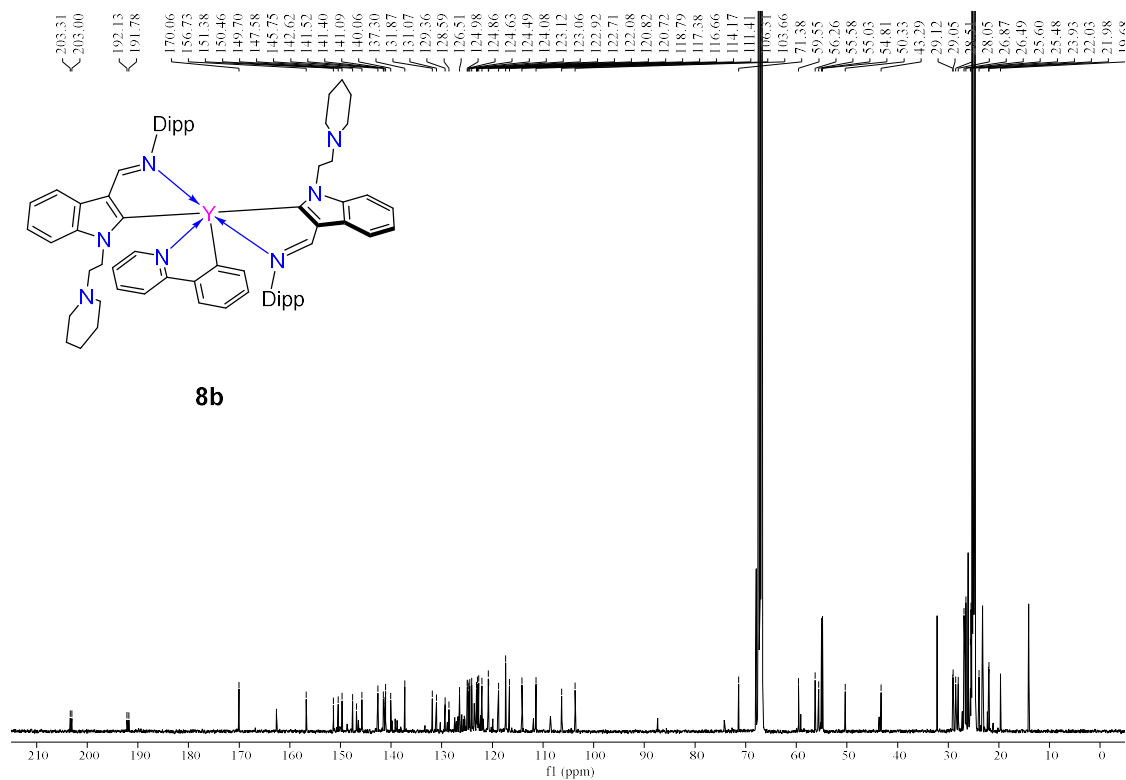

**Fig. S42.**  $^{13}\text{C}\{^1\text{H}\}$  NMR spectrum of **8b** (125 MHz,  $\text{THF-}d_8$ , 298 K)

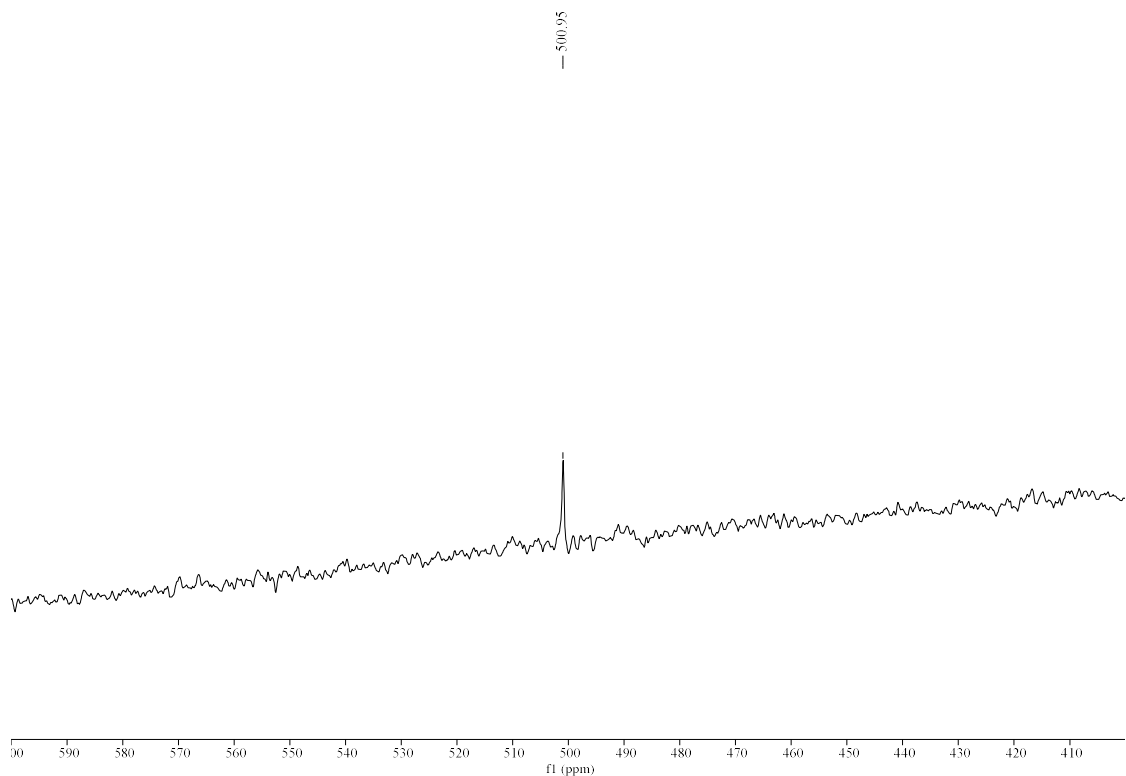

**Fig. S43.**  $^{89}\text{Y}$  NMR spectrum of **8b** (24.5 MHz,  $\text{C}_6\text{D}_6$ , 298 K)

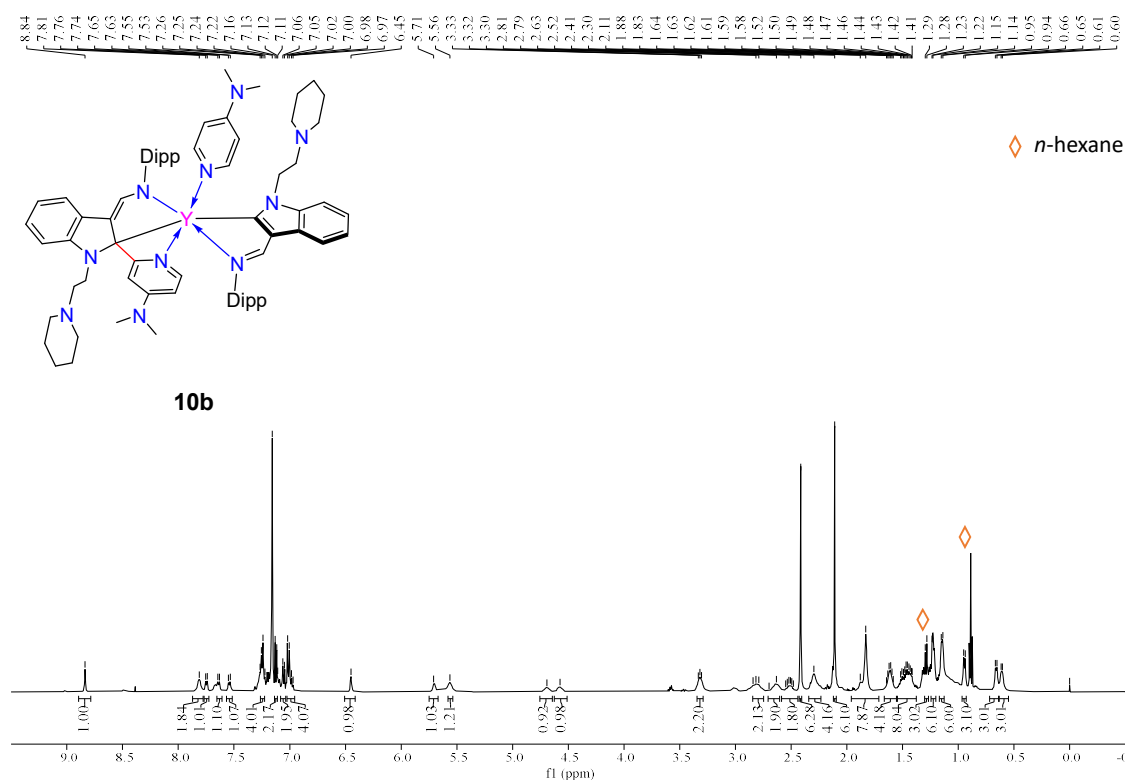

**Fig. S44.** <sup>1</sup>H NMR spectrum of **10b** (500 MHz, C<sub>6</sub>D<sub>6</sub>, 298 K)

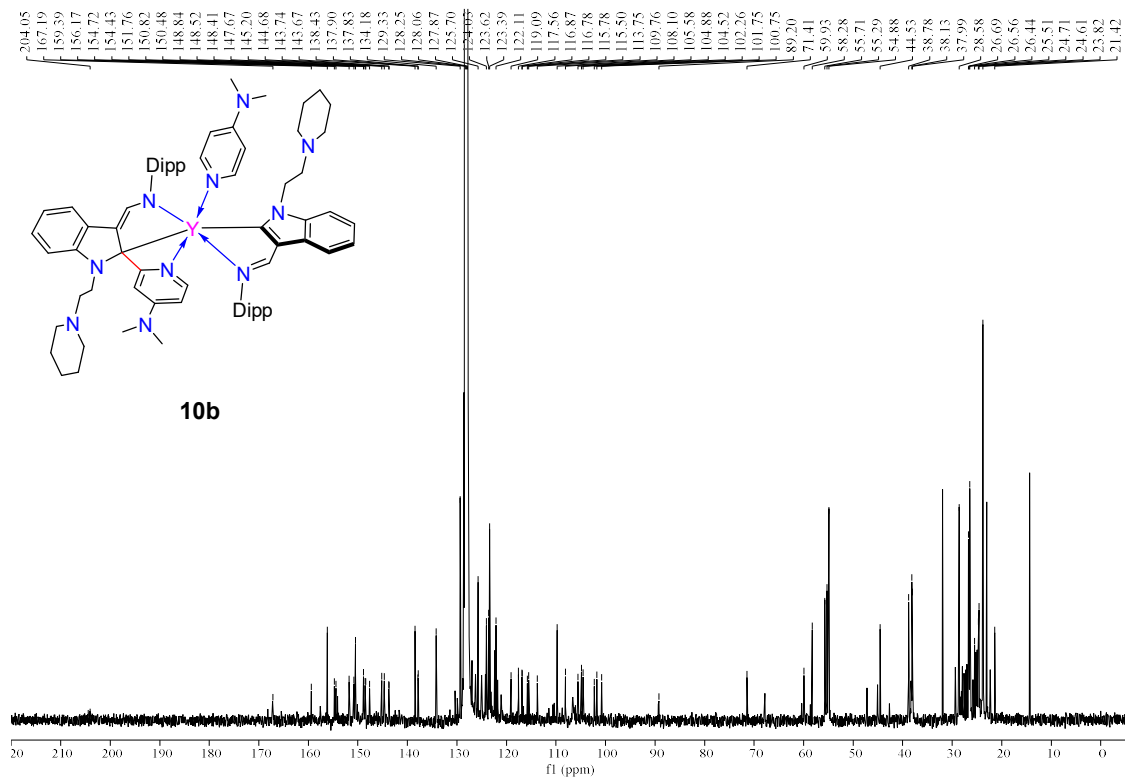

**Fig. S45.** <sup>13</sup>C{<sup>1</sup>H} NMR spectrum of **10b** (125 MHz, C<sub>6</sub>D<sub>6</sub>, 298 K)

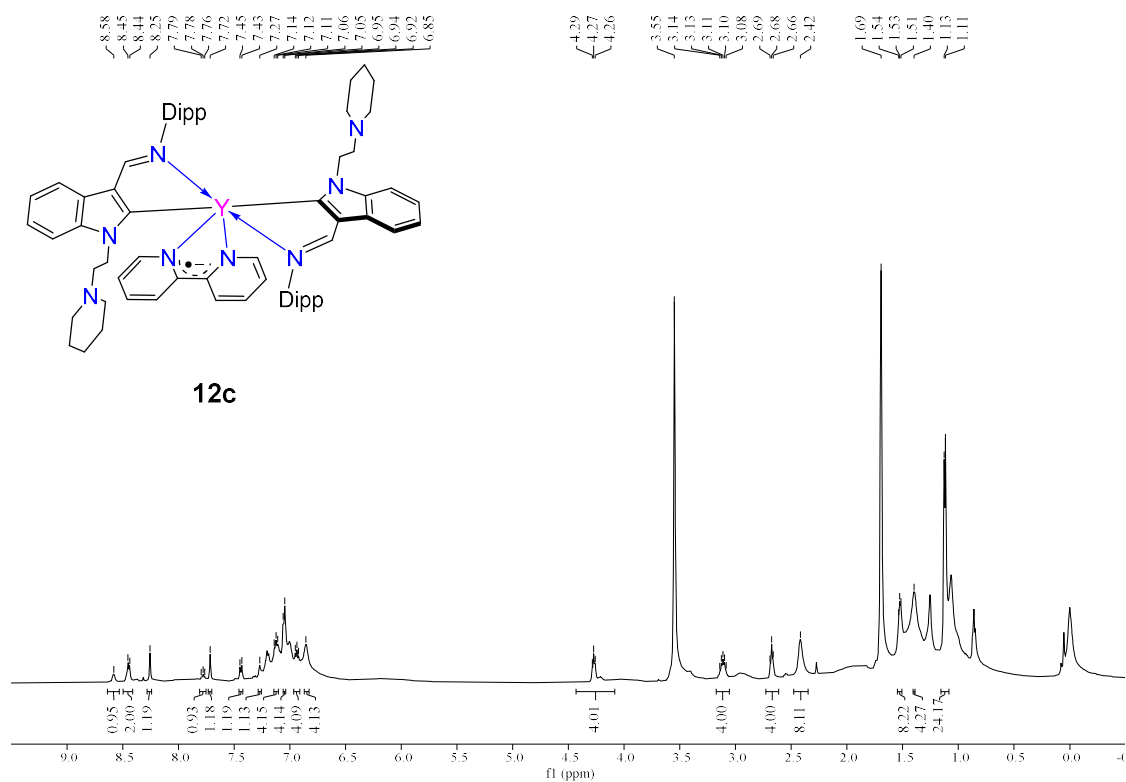

**Fig. S46.**  $^1\text{H}$  NMR spectrum of **12c** (500 MHz,  $\text{THF-}d_8$ , 298 K)

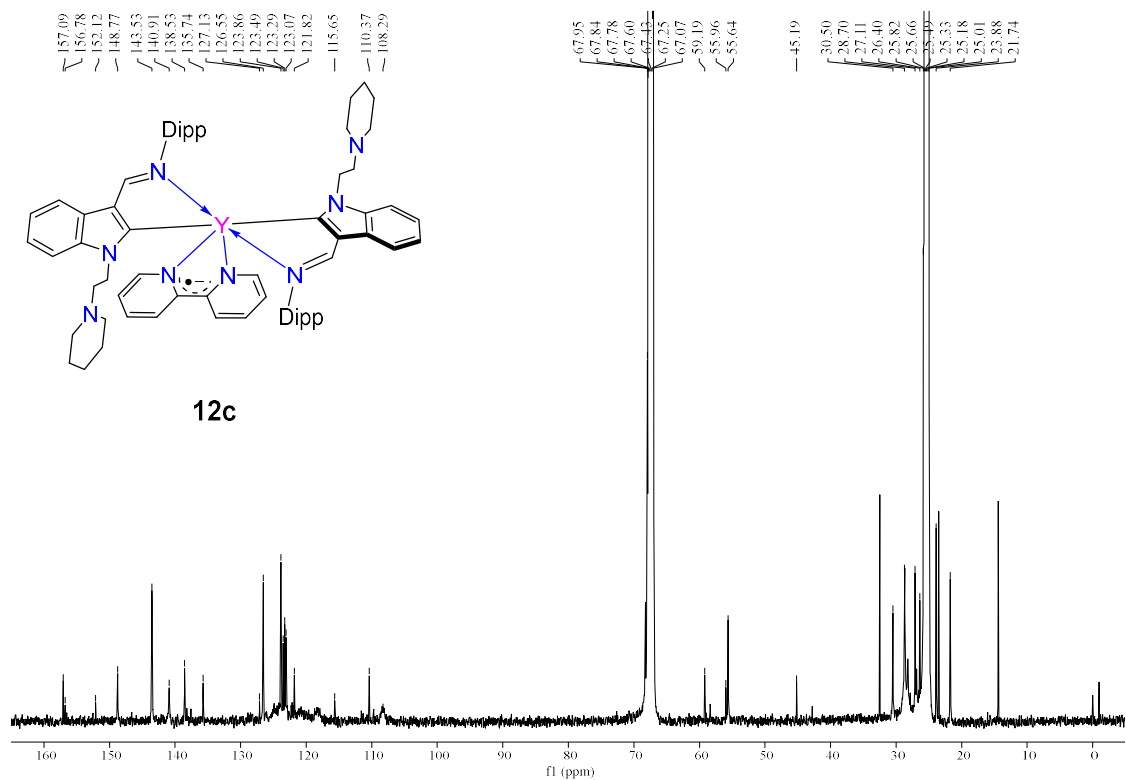

**Fig. S47.**  $^{13}\text{C}\{^1\text{H}\}$  NMR spectrum of **12c** (125 MHz,  $\text{THF-}d_8$ , 298 K)

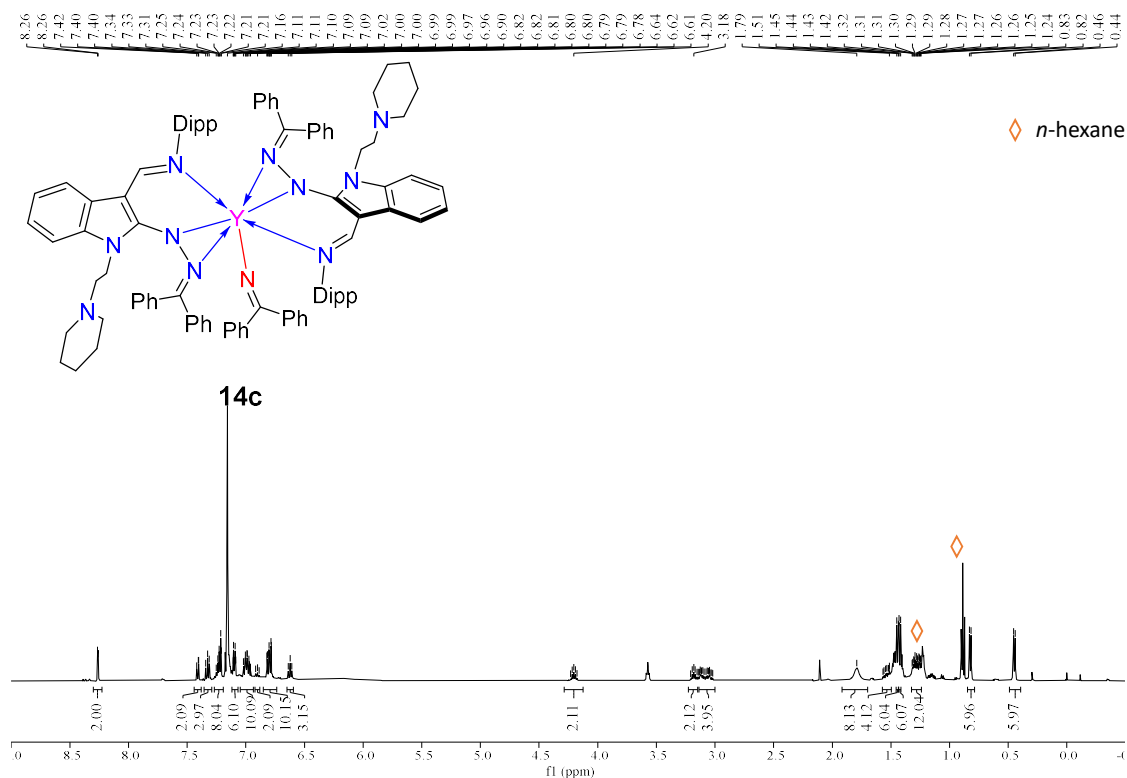

**Fig. S48.**  $^1\text{H}$  NMR spectrum of **14c** (500 MHz,  $\text{C}_6\text{D}_6$ , 298 K)

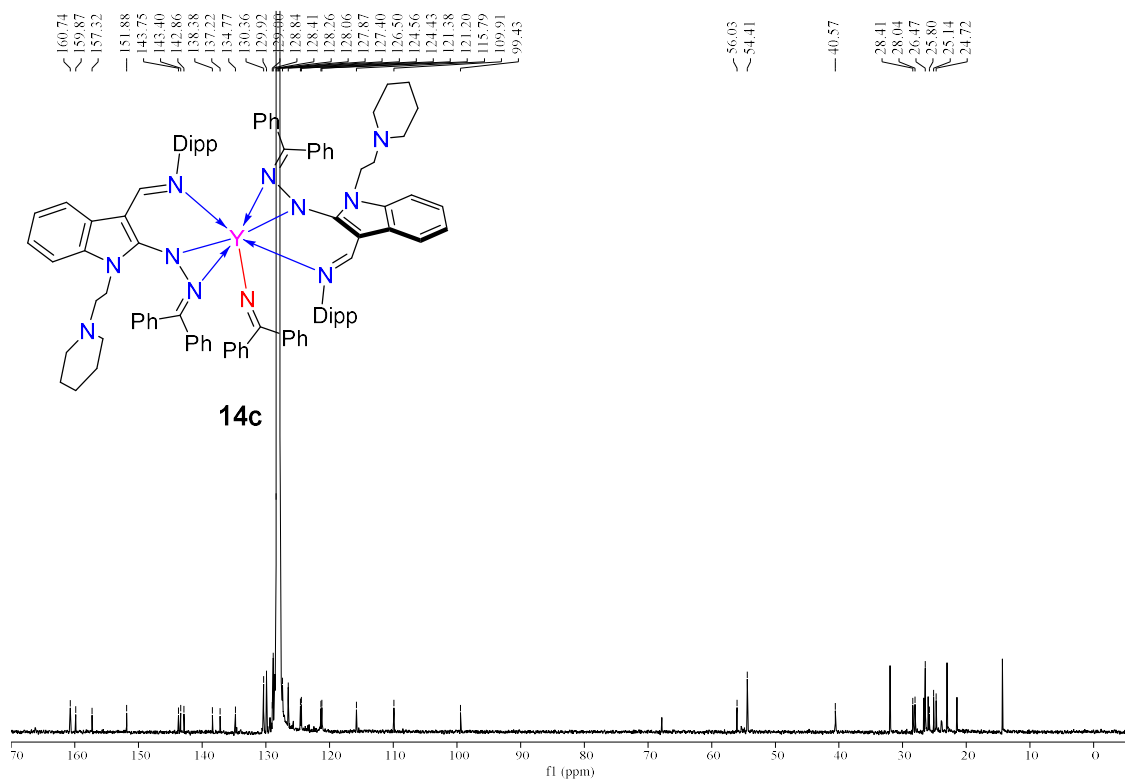

**Fig. S49.**  $^{13}\text{C}\{^1\text{H}\}$  NMR spectrum of **14c** (125 MHz,  $\text{C}_6\text{D}_6$ , 298 K)



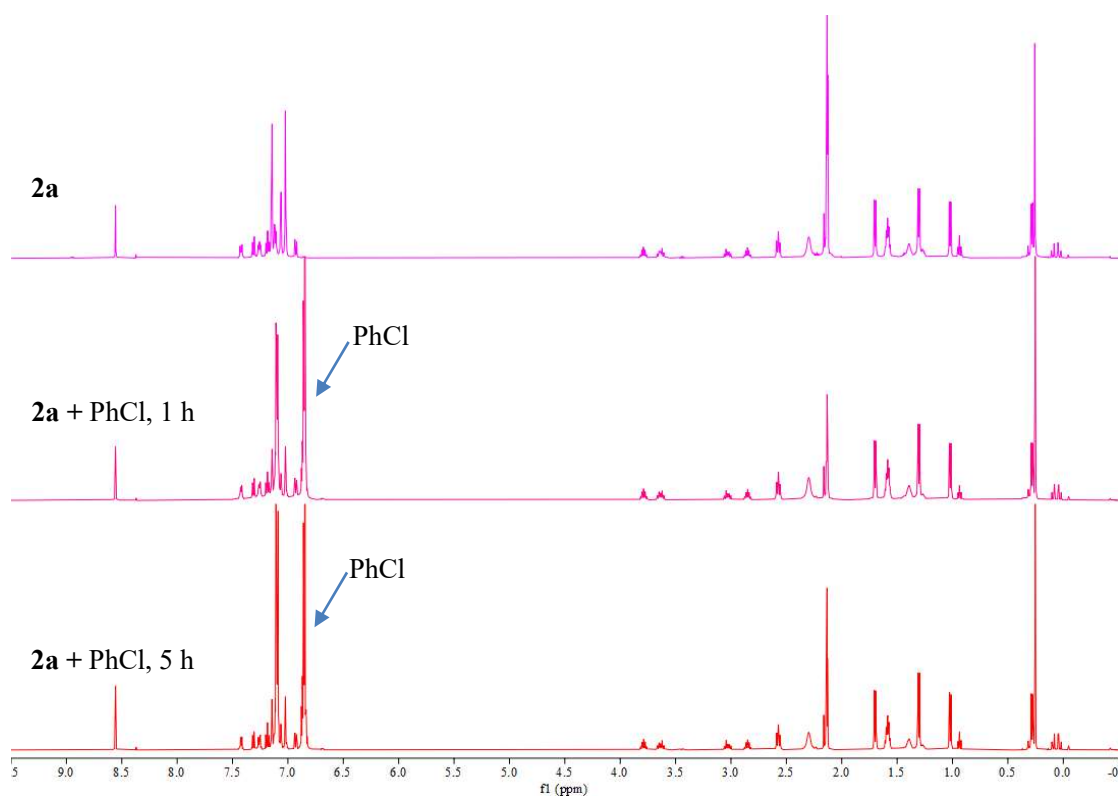

**Fig. S50.** The reaction of **2a** with PhCl monitored by  $^1\text{H}$  NMR spectrum (500 MHz,  $\text{C}_7\text{D}_8$ , 298 K)

## 4. DFT Calculations

### Computational details

The optimization of yttrium complexes was carried out by employing DFT hybrid functional (B3PW91)<sup>11</sup> along with small core pseudopotential Stuttgart basis set for yttrium, and silicon atoms with additional polarization functions for silicon atoms.<sup>12</sup> Pople basis sets (6-31G\*\*) were employed for the rest of the atoms.<sup>13</sup> Frequency calculations were performed to locate minima for the optimized structures (maxima for TS structures). All the calculations were performed using Gaussian 09 suite of programs.<sup>14</sup>

**Table S1.** DFT computed natural charges for **1d**

| Atom Label | Natural Charges |
|------------|-----------------|
| C1         | -0.19823        |
| C65        | -1.66362        |
| C80        | -1.64763        |
| N120       | -0.60406        |
| O122       | -0.63627        |
| O123       | -0.61515        |
| Y126       | 1.76870         |

**Table S2.** DFT computed natural charges for **B**

| Atom Label | Natural Charges |
|------------|-----------------|
| C1         | -0.15301        |
| C65        | -1.63233        |
| C80        | -1.63411        |
| N108       | -0.63435        |
| O110       | -0.60922        |
| Y113       | 1.65191         |
| N123       | -0.58339        |

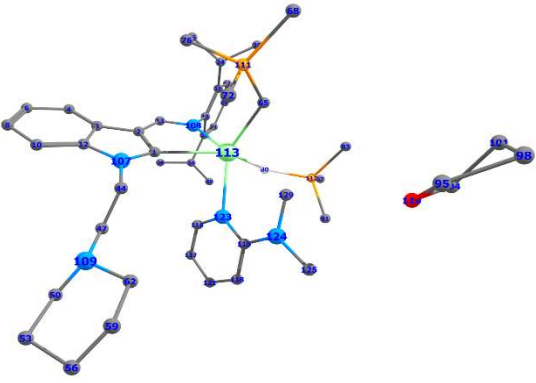

**Table S3.** DFT computed natural charges for TS(B-C)

| Atom Label | Natural Charges |
|------------|-----------------|
| Y113       | 1.64070         |
| C80        | -1.48911        |
| H131       | 0.24266         |
| C129       | -0.66886        |

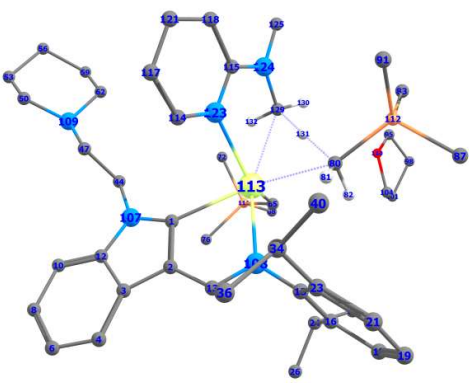

**Table S4.** DFT computed Wiberg bond index for TS(B-C)

| Atom Label | Wiberg bond index |
|------------|-------------------|
| Y113       | 0.0000            |
| C80        | 0.2597            |
| H131       | 0.0655            |
| C129       | 0.1904            |

**Table S5.** DFT computed natural charges for C

| Atom Label | Natural Charges |
|------------|-----------------|
| C1         | -0.17668        |
| C65        | -1.65738        |
| C80        | -1.24387        |
| N108       | -0.64407        |
| O110       | -0.59366        |
| Y113       | 1.80566         |
| N123       | -0.61825        |
| C129       | -0.88502        |

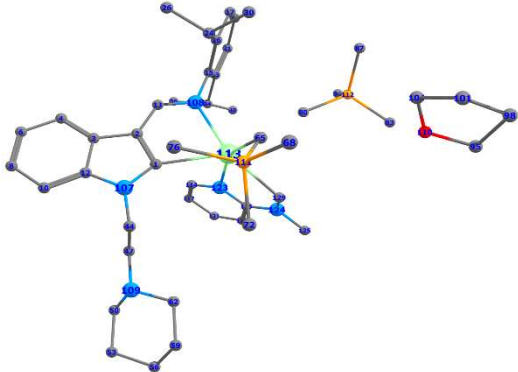

**Table S6.** DFT computed natural charges for D

| Atom Label | Natural Charges |
|------------|-----------------|
| C1         | -0.15925        |
| C65        | -1.63333        |
| N93        | -0.63973        |
| O95        | -0.61545        |
| Y97        | 1.76058         |
| N106       | -0.61844        |
| C113       | -0.87897        |

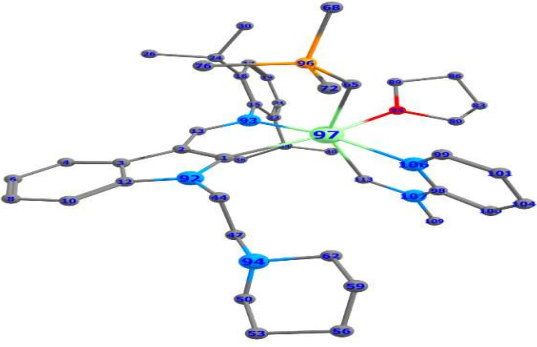

**Table S7.** DFT computed natural charges for **TS(D-E)**

| Atom Label | Natural Charges |
|------------|-----------------|
| Y97        | 1.79592         |
| C1         | -0.25395        |
| C113       | -0.49957        |
| N107       | -0.39461        |

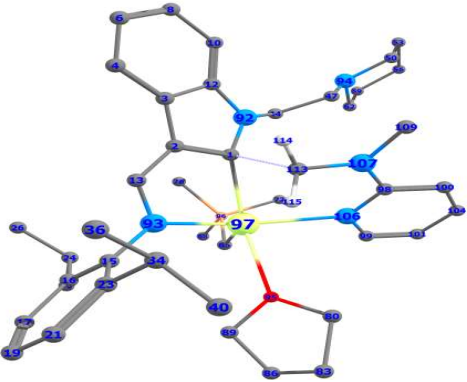

**Table S8.** DFT computed Wiberg bond index for **TS(D-E)**

| Atom Label | Wiberg bond index |
|------------|-------------------|
| Y97        | 0.0000            |
| C1         | 0.4060            |
| C113       | 0.1530            |
| N107       | 0.0143            |

**Table S9.** DFT computed natural charges for **TS(E-F)**

| Atom Label | Natural Charges |
|------------|-----------------|
| Y97        | 1.73303         |
| C1         | -0.13528        |
| C113       | -0.33082        |
| N107       | -0.57631        |

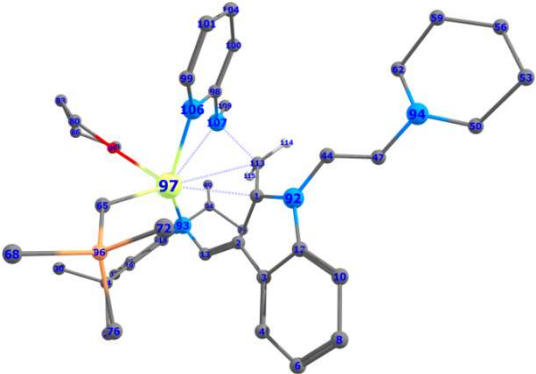

**Table S10.** DFT computed Wiberg bond index for **TS(E-F)**

| Atom Label | Wiberg bond index |
|------------|-------------------|
| Y97        | 0.0000            |
| C1         | 0.1942            |
| C113       | 0.0708            |
| N107       | 0.1586            |

**Table S11.** DFT computed natural charges for TS(G-H)

| Atom Label | Natural Charges |
|------------|-----------------|
| Y97        | 1.81287         |
| C65        | -1.46132        |
| C113       | -0.94504        |
| H114       | 0.25556         |

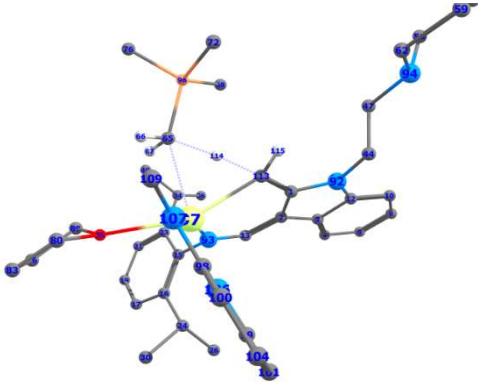

**Table S12.** DFT computed Wiberg bond index for TS(G-H)

| Atom Label | Wiberg bond index |
|------------|-------------------|
| Y97        | 0.0000            |
| C65        | 0.2475            |
| C113       | 0.4063            |
| H114       | 0.0616            |

**Table S13.** DFT computed natural charges for H

| Atom Label | Natural Charges |
|------------|-----------------|
| Y81        | 1.72848         |
| N78        | -0.75622        |
| N90        | -0.63912        |
| N91        | -0.76698        |
| C97        | -0.87935        |

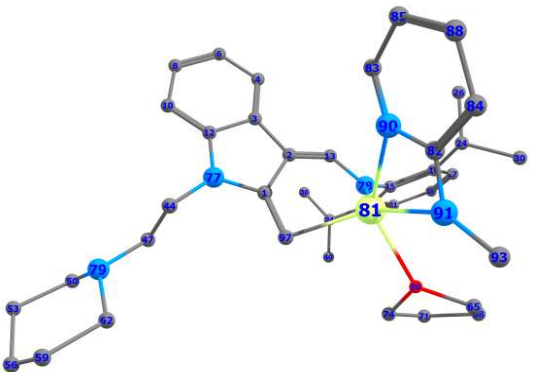

**Table S14.** DFT computed Wiberg bond index for H

| Atom Label | Wiberg bond index | Atom Label | Wiberg bond index |
|------------|-------------------|------------|-------------------|
| Y81        | 0.0000            |            |                   |
| N78        | 0.3471            |            |                   |
| N90        | 0.2536            |            |                   |
| N91        | 0.3150            |            |                   |
| C97        | 0.6703            | C97        | 1.5994            |

|    |        |    |        |
|----|--------|----|--------|
| C1 | 0.0929 | C1 | 0.0000 |
|----|--------|----|--------|

**Table S15.** Second order perturbation analysis for **H**

| Donor                                                                                                                                                       | Acceptor                                                                                                                                                         | E2 (kcal/mol) |
|-------------------------------------------------------------------------------------------------------------------------------------------------------------|------------------------------------------------------------------------------------------------------------------------------------------------------------------|---------------|
| <u>BD (1) C1-C97</u><br>(53.58%) 0.7320*C1 s (42.14%) p 1.37<br>(57.84%) d 0.00 (0.03%)<br>(46.42%) 0.6813*C97 s(37.26%) p 1.68<br>(62.68%) d 0.00 (0.06%)  | <u>LP* (1) Y81</u><br>s (40.92%) p 0.32 (13.16%) d<br>1.12 (45.92%)                                                                                              | 7.45          |
| <u>BD (1) C1-C97</u><br>(53.58%) 0.7320*C1 s (42.14%) p 1.37<br>(57.84%) d 0.00 (0.03%)<br>(46.42%) 0.6813*C97 s (37.26%) p 1.68<br>(62.68%) d 0.00 (0.06%) | <u>LP* (7) Y81</u><br>s (3.11%) p 23.44 (72.85%) d<br>7.74 (24.05%)                                                                                              | 7.48          |
| <u>BD (2) C1-C97</u><br>(47.41%) 0.6885*C1 s (0.04%) p 99.99<br>(99.91%) d 1.18 (0.05%)<br>(52.59%) 0.7252*C97 s (0.02%) p 99.99<br>(99.89%) d 5.87 (0.09%) | <u>LP* (4) Y81</u><br>s (3.72%) p 4.89 (18.21%) d<br>20.96 (78.07%)                                                                                              | 11.13         |
| <u>BD (2) C1-C97</u><br>(47.41%) 0.6885*C1 s (0.04%) p 99.99<br>(99.91%) d 1.18 (0.05%)<br>(52.59%) 0.7252*C97 s (0.02%) p 99.99<br>(99.89%) d 5.87 (0.09%) | <u>BD* (2) C2-C13</u><br>(42.14%) 0.6492*C2 s (0.08%) p<br>99.99 (99.90%) d 0.23 (0.02%)<br>(57.86%) -0.7607*C13 s<br>(0.03%) p 99.99 (99.90%) d 2.33<br>(0.07%) | 11.07         |
| <u>BD (1) C2-C13</u><br>(51.20%) 0.7156*C2 s (37.08%) p 1.70<br>(62.88%) d 0.00 (0.03%)<br>(48.80%) 0.6985*C13 s (38.41%) p 1.60<br>(61.55%) d 0.00 (0.04%) | <u>LP* (7) Y81</u><br>s (3.11%) p 23.44 (72.85%) d<br>7.74 (24.05%)                                                                                              | 8.32          |
| <u>BD (2) C2-C13</u><br>(57.86%) 0.7607*C2 s (0.08%) p 99.99<br>(99.90%) d 0.23 (0.02%)<br>(42.14%) 0.6492*C13 s (0.03%) p 99.99<br>(99.90%) d 2.33 (0.07%) | <u>BD* (2) C1-C97</u><br>(52.59%) 0.7252*C1 s (0.04%) p<br>99.99 (99.91%) d 1.18 (0.05%)<br>(47.41%) -0.6885*C97 s<br>(0.02%) p 99.99 (99.89%) d 5.87<br>(0.09%) | 15.93         |
| <u>LP (1) C97</u><br>s (30.28%) p 2.30 (69.70%) d 0.00<br>(0.02%)                                                                                           | <u>LP* (1) Y81</u><br>s (40.92%) p 0.32 (13.16%) d<br>1.12 (45.92%)                                                                                              | 111.28        |
| <u>LP (1) C97</u><br>s (30.28%) p 2.30 (69.70%) d 0.00<br>(0.02%)                                                                                           | <u>LP* (4) Y81</u><br>s (3.72%) p 4.89 (18.21%) d<br>20.96 (78.07%)                                                                                              | 7.33          |

**Fig. S51.** DFT computed MOs (left-HOMO and Right-HOMO-4) for **H**

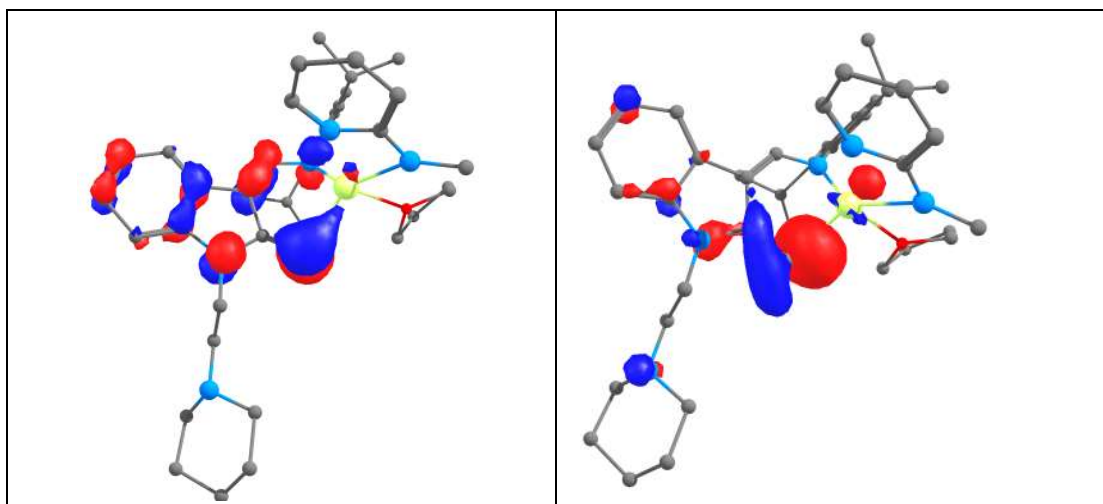

### Optimized coordinates

#### 1d

|   |              |              |              |
|---|--------------|--------------|--------------|
| C | 4.393341000  | 6.275227000  | -0.112615000 |
| C | 3.368531000  | 6.241177000  | -1.089240000 |
| C | 3.596874000  | 7.284478000  | -2.063392000 |
| C | 2.958470000  | 7.721599000  | -3.231644000 |
| H | 2.051977000  | 7.237965000  | -3.586792000 |
| C | 3.505843000  | 8.783562000  | -3.942618000 |
| H | 3.019703000  | 9.127841000  | -4.851355000 |
| C | 4.683320000  | 9.415267000  | -3.510267000 |
| H | 5.094701000  | 10.236678000 | -4.090113000 |
| C | 5.334484000  | 9.002939000  | -2.351931000 |
| H | 6.249760000  | 9.488798000  | -2.026812000 |
| C | 4.775321000  | 7.940707000  | -1.638901000 |
| C | 2.303512000  | 5.301215000  | -1.082630000 |
| H | 1.577164000  | 5.366548000  | -1.902494000 |
| C | 0.987350000  | 3.536659000  | -0.311947000 |
| C | 1.079075000  | 2.325578000  | -1.035572000 |
| C | -0.050323000 | 1.502039000  | -1.109065000 |
| H | 0.007402000  | 0.574398000  | -1.672218000 |
| C | -1.245236000 | 1.850738000  | -0.492779000 |
| H | -2.111370000 | 1.198571000  | -0.566761000 |
| C | -1.326988000 | 3.048173000  | 0.209772000  |
| H | -2.265756000 | 3.324176000  | 0.681559000  |
| C | -0.227869000 | 3.904506000  | 0.316923000  |
| C | 2.344456000  | 1.925167000  | -1.776576000 |
| H | 3.157334000  | 2.564903000  | -1.419663000 |
| C | 2.184647000  | 2.173022000  | -3.284824000 |
| H | 1.364899000  | 1.572602000  | -3.695974000 |
| H | 3.101027000  | 1.906061000  | -3.821697000 |
| H | 1.964980000  | 3.223969000  | -3.496665000 |

|   |              |              |              |
|---|--------------|--------------|--------------|
| C | 2.755541000  | 0.471849000  | -1.509677000 |
| H | 2.848963000  | 0.274009000  | -0.437115000 |
| H | 3.724004000  | 0.262539000  | -1.975302000 |
| H | 2.035215000  | -0.243433000 | -1.921977000 |
| C | -0.356486000 | 5.220840000  | 1.067529000  |
| H | 0.651633000  | 5.495909000  | 1.394239000  |
| C | -0.879088000 | 6.333476000  | 0.144514000  |
| H | -0.223433000 | 6.486527000  | -0.716797000 |
| H | -0.955551000 | 7.285229000  | 0.683129000  |
| H | -1.875123000 | 6.081483000  | -0.236595000 |
| C | -1.237343000 | 5.129060000  | 2.320174000  |
| H | -2.293892000 | 4.979944000  | 2.072315000  |
| H | -1.175355000 | 6.061458000  | 2.891733000  |
| H | -0.932917000 | 4.307325000  | 2.976481000  |
| C | 6.375469000  | 7.764169000  | 0.271329000  |
| H | 7.209795000  | 7.927865000  | -0.420118000 |
| H | 6.654695000  | 6.957893000  | 0.951038000  |
| C | 6.107254000  | 9.068036000  | 1.036562000  |
| H | 5.671548000  | 9.791429000  | 0.339058000  |
| H | 5.339269000  | 8.882325000  | 1.814332000  |
| C | 7.177352000  | 11.069472000 | 1.861631000  |
| H | 6.423255000  | 11.253777000 | 2.656811000  |
| H | 6.808142000  | 11.560397000 | 0.953654000  |
| C | 8.509384000  | 11.685953000 | 2.282471000  |
| H | 9.211098000  | 11.608215000 | 1.442457000  |
| H | 8.367451000  | 12.752919000 | 2.491613000  |
| C | 9.083301000  | 10.962415000 | 3.500633000  |
| H | 8.435906000  | 11.147489000 | 4.369948000  |
| H | 10.073791000 | 11.356643000 | 3.755731000  |
| C | 9.148359000  | 9.459048000  | 3.233013000  |
| H | 9.463570000  | 8.914137000  | 4.130160000  |
| H | 9.888734000  | 9.253373000  | 2.449796000  |
| C | 7.791924000  | 8.931200000  | 2.773040000  |
| H | 7.867108000  | 7.863505000  | 2.547488000  |
| H | 7.059189000  | 9.029264000  | 3.603306000  |
| C | 5.622038000  | 2.639507000  | 0.284181000  |
| H | 6.197991000  | 2.213501000  | 1.128144000  |
| H | 4.961372000  | 1.825671000  | -0.064126000 |
| C | 7.842408000  | 1.333023000  | -1.519594000 |
| H | 8.374754000  | 0.942022000  | -0.644936000 |
| H | 8.580519000  | 1.510089000  | -2.310649000 |
| H | 7.160655000  | 0.548736000  | -1.868336000 |
| C | 8.183196000  | 4.211865000  | -0.541838000 |
| H | 7.719620000  | 5.190496000  | -0.381855000 |

|   |             |              |              |
|---|-------------|--------------|--------------|
| H | 8.957186000 | 4.328861000  | -1.308675000 |
| H | 8.676834000 | 3.915049000  | 0.390334000  |
| C | 6.063068000 | 3.547371000  | -2.673943000 |
| H | 5.357297000 | 2.807453000  | -3.067466000 |
| H | 6.810277000 | 3.737861000  | -3.452619000 |
| H | 5.511089000 | 4.476086000  | -2.496640000 |
| C | 5.938582000 | 4.936332000  | 3.056065000  |
| H | 6.738544000 | 5.127927000  | 2.310616000  |
| H | 5.638316000 | 5.937322000  | 3.417880000  |
| C | 5.683155000 | 3.688427000  | 5.936366000  |
| H | 5.257737000 | 4.603115000  | 6.365939000  |
| H | 6.244866000 | 3.187927000  | 6.733226000  |
| H | 4.851982000 | 3.031222000  | 5.656142000  |
| C | 8.244268000 | 5.148403000  | 5.198522000  |
| H | 8.993154000 | 5.381482000  | 4.433029000  |
| H | 8.756122000 | 4.633064000  | 6.019843000  |
| H | 7.862164000 | 6.099499000  | 5.586969000  |
| C | 7.645070000 | 2.458761000  | 3.897812000  |
| H | 6.913261000 | 1.740010000  | 3.516022000  |
| H | 8.186558000 | 1.984050000  | 4.723864000  |
| H | 8.364576000 | 2.647432000  | 3.093561000  |
| C | 3.844358000 | 1.292413000  | 3.010882000  |
| H | 4.544236000 | 1.625442000  | 3.782111000  |
| H | 4.410184000 | 0.900444000  | 2.162961000  |
| C | 2.799843000 | 0.320960000  | 3.556249000  |
| H | 2.481466000 | -0.380169000 | 2.777570000  |
| H | 3.184529000 | -0.260982000 | 4.397648000  |
| C | 1.641543000 | 1.246241000  | 3.937563000  |
| H | 1.830075000 | 1.725858000  | 4.904683000  |
| H | 0.677981000 | 0.732550000  | 3.988385000  |
| C | 1.692063000 | 2.267155000  | 2.814610000  |
| H | 1.214803000 | 1.893154000  | 1.902821000  |
| H | 1.265147000 | 3.240629000  | 3.061254000  |
| C | 2.687434000 | 5.469479000  | 4.355598000  |
| H | 3.539110000 | 4.836033000  | 4.611282000  |
| H | 1.754661000 | 4.941461000  | 4.592579000  |
| C | 2.729782000 | 6.842154000  | 5.016635000  |
| H | 3.766868000 | 7.161969000  | 5.162945000  |
| H | 2.229843000 | 6.849596000  | 5.988890000  |
| C | 2.043902000 | 7.722205000  | 3.969785000  |
| H | 0.955142000 | 7.612915000  | 4.027571000  |
| H | 2.285984000 | 8.783706000  | 4.068860000  |
| C | 2.576860000 | 7.129542000  | 2.674013000  |
| H | 1.915675000 | 7.252136000  | 1.813555000  |



|    |             |             |              |
|----|-------------|-------------|--------------|
| H  | 3.560025000 | 7.538094000 | 2.416664000  |
| N  | 5.210696000 | 7.313126000 | -0.470040000 |
| N  | 2.133285000 | 4.377540000 | -0.172425000 |
| N  | 7.321329000 | 9.643088000 | 1.587341000  |
| O  | 3.103053000 | 2.463544000 | 2.562800000  |
| O  | 2.720942000 | 5.711738000 | 2.930345000  |
| Si | 6.881758000 | 2.924773000 | -1.072378000 |
| Si | 6.834330000 | 4.088479000 | 4.460338000  |
| Y  | 4.284032000 | 4.297235000 | 1.395654000  |

**B**

|   |              |              |              |
|---|--------------|--------------|--------------|
| C | -0.323317000 | 1.203192000  | -1.617286000 |
| C | -1.456230000 | 1.214790000  | -2.468023000 |
| C | -1.195597000 | 2.051654000  | -3.617279000 |
| C | -1.903098000 | 2.427497000  | -4.765923000 |
| H | -2.914583000 | 2.069513000  | -4.940603000 |
| C | -1.290375000 | 3.265871000  | -5.691109000 |
| H | -1.830956000 | 3.563202000  | -6.585546000 |
| C | 0.019674000  | 3.730012000  | -5.492797000 |
| H | 0.477070000  | 4.377686000  | -6.235424000 |
| C | 0.744333000  | 3.370427000  | -4.359897000 |
| H | 1.759813000  | 3.727147000  | -4.213532000 |
| C | 0.119856000  | 2.535149000  | -3.432463000 |
| C | -2.636204000 | 0.490989000  | -2.168711000 |
| H | -3.494795000 | 0.605487000  | -2.840178000 |
| C | -4.052729000 | -0.879653000 | -0.910425000 |
| C | -4.357575000 | -2.144412000 | -1.456851000 |
| C | -5.629616000 | -2.679635000 | -1.227165000 |
| H | -5.881905000 | -3.647460000 | -1.652180000 |
| C | -6.577167000 | -1.996046000 | -0.476217000 |
| H | -7.560825000 | -2.427833000 | -0.312166000 |
| C | -6.259191000 | -0.755261000 | 0.064415000  |
| H | -7.002881000 | -0.223190000 | 0.650981000  |
| C | -5.002506000 | -0.177238000 | -0.133860000 |
| C | -3.366999000 | -2.909380000 | -2.319578000 |
| H | -2.389809000 | -2.428407000 | -2.209444000 |
| C | -3.754903000 | -2.824398000 | -3.803697000 |
| H | -4.738270000 | -3.275509000 | -3.978941000 |
| H | -3.025668000 | -3.353149000 | -4.427327000 |
| H | -3.801432000 | -1.785869000 | -4.146481000 |
| C | -3.210970000 | -4.371178000 | -1.881012000 |
| H | -2.944537000 | -4.443934000 | -0.822149000 |
| H | -2.422672000 | -4.859323000 | -2.463950000 |
| H | -4.131728000 | -4.944553000 | -2.034916000 |

|   |              |              |              |
|---|--------------|--------------|--------------|
| C | -4.697527000 | 1.195851000  | 0.445476000  |
| H | -3.607729000 | 1.310454000  | 0.442448000  |
| C | -5.283547000 | 2.308544000  | -0.437664000 |
| H | -4.891511000 | 2.264597000  | -1.458472000 |
| H | -5.046192000 | 3.296832000  | -0.027284000 |
| H | -6.374366000 | 2.222115000  | -0.497851000 |
| C | -5.167922000 | 1.353200000  | 1.896184000  |
| H | -6.260275000 | 1.345123000  | 1.977623000  |
| H | -4.824282000 | 2.312081000  | 2.300234000  |
| H | -4.772407000 | 0.553695000  | 2.528428000  |
| C | 1.912797000  | 2.333738000  | -1.707626000 |
| H | 2.653716000  | 2.248849000  | -2.511599000 |
| H | 2.148340000  | 1.583800000  | -0.950532000 |
| C | 1.970584000  | 3.754808000  | -1.129581000 |
| H | 1.462897000  | 4.425143000  | -1.831595000 |
| H | 1.391493000  | 3.786907000  | -0.186616000 |
| C | 3.357035000  | 5.682442000  | -0.751735000 |
| H | 2.841736000  | 5.959397000  | 0.192640000  |
| H | 2.799331000  | 6.157138000  | -1.567523000 |
| C | 4.786769000  | 6.215521000  | -0.717138000 |
| H | 5.248152000  | 6.049280000  | -1.698752000 |
| H | 4.767999000  | 7.298055000  | -0.544756000 |
| C | 5.603560000  | 5.504996000  | 0.361738000  |
| H | 5.206970000  | 5.772098000  | 1.351867000  |
| H | 6.648598000  | 5.835140000  | 0.340750000  |
| C | 5.508312000  | 3.991748000  | 0.172098000  |
| H | 6.013017000  | 3.462063000  | 0.988932000  |
| H | 6.009714000  | 3.704457000  | -0.760660000 |
| C | 4.050435000  | 3.541887000  | 0.100790000  |
| H | 4.012028000  | 2.464539000  | -0.090340000 |
| H | 3.561830000  | 3.710761000  | 1.084341000  |
| C | 0.283416000  | -2.612520000 | -0.600972000 |
| H | 0.789890000  | -3.108148000 | 0.245760000  |
| H | -0.613311000 | -3.232806000 | -0.785039000 |
| C | 1.921125000  | -4.631702000 | -2.377990000 |
| H | 2.468202000  | -5.018411000 | -1.510467000 |
| H | 2.567195000  | -4.737259000 | -3.257412000 |
| H | 1.045352000  | -5.273422000 | -2.525852000 |
| C | 2.999312000  | -1.807340000 | -1.907338000 |
| H | 2.784840000  | -0.734452000 | -1.847857000 |
| H | 3.663899000  | -1.964451000 | -2.764242000 |
| H | 3.548554000  | -2.096665000 | -1.003987000 |
| C | 0.525952000  | -2.231030000 | -3.688053000 |
| H | -0.366029000 | -2.833485000 | -3.892072000 |

|    |              |              |              |
|----|--------------|--------------|--------------|
| H  | 1.190544000  | -2.320838000 | -4.554692000 |
| H  | 0.212685000  | -1.184782000 | -3.607974000 |
| C  | -2.034272000 | -1.040441000 | 2.128316000  |
| H  | -2.344081000 | -0.058336000 | 2.529038000  |
| H  | -2.939164000 | -1.455420000 | 1.646371000  |
| C  | -1.026266000 | -3.836460000 | 3.098535000  |
| H  | -1.721427000 | -4.338675000 | 2.416194000  |
| H  | -0.884070000 | -4.488123000 | 3.968308000  |
| H  | -0.066945000 | -3.749783000 | 2.576815000  |
| C  | -3.279158000 | -2.471626000 | 4.644383000  |
| H  | -3.703451000 | -1.537427000 | 5.029731000  |
| H  | -3.072951000 | -3.125283000 | 5.500265000  |
| H  | -4.048411000 | -2.954110000 | 4.030853000  |
| C  | -0.454593000 | -1.324283000 | 4.805077000  |
| H  | 0.522428000  | -1.171225000 | 4.334852000  |
| H  | -0.305156000 | -1.945627000 | 5.695392000  |
| H  | -0.818732000 | -0.345858000 | 5.138704000  |
| C  | 5.613466000  | -3.532655000 | 2.186410000  |
| H  | 6.455620000  | -2.868821000 | 2.414661000  |
| H  | 5.394297000  | -3.449881000 | 1.113531000  |
| C  | 5.873082000  | -4.984327000 | 2.593838000  |
| H  | 6.309695000  | -5.574652000 | 1.783903000  |
| H  | 6.556438000  | -5.027942000 | 3.449386000  |
| C  | 4.476220000  | -5.454318000 | 3.008125000  |
| H  | 4.487954000  | -6.317276000 | 3.679291000  |
| H  | 3.879783000  | -5.714158000 | 2.126566000  |
| C  | 3.923716000  | -4.197756000 | 3.669747000  |
| H  | 2.832013000  | -4.129244000 | 3.642309000  |
| H  | 4.248061000  | -4.129284000 | 4.719451000  |
| N  | 0.597575000  | 2.008492000  | -2.228113000 |
| N  | -2.762470000 | -0.296668000 | -1.127464000 |
| N  | 3.332822000  | 4.237755000  | -0.963540000 |
| O  | 4.462537000  | -3.100883000 | 2.925152000  |
| Si | 1.390273000  | -2.817716000 | -2.098439000 |
| Si | -1.708396000 | -2.129909000 | 3.610197000  |
| Y  | -0.673648000 | -0.563209000 | 0.182909000  |
| C  | -0.395271000 | 2.259395000  | 1.622644000  |
| C  | 1.441399000  | 1.226240000  | 2.590549000  |
| H  | -1.167110000 | 2.207531000  | 0.855630000  |
| C  | -0.308902000 | 3.370655000  | 2.438050000  |
| C  | 1.607421000  | 2.337078000  | 3.458429000  |
| H  | -1.016745000 | 4.185027000  | 2.337685000  |
| H  | 2.412014000  | 2.347906000  | 4.181748000  |
| C  | 0.727083000  | 3.395163000  | 3.379805000  |

|   |             |              |             |
|---|-------------|--------------|-------------|
| H | 0.845857000 | 4.243879000  | 4.047779000 |
| N | 0.435098000 | 1.200461000  | 1.682305000 |
| N | 2.288354000 | 0.162712000  | 2.638059000 |
| C | 3.358487000 | 0.111953000  | 3.619362000 |
| H | 3.893177000 | -0.831722000 | 3.506157000 |
| H | 4.071818000 | 0.933555000  | 3.476438000 |
| H | 2.968407000 | 0.163908000  | 4.644213000 |
| C | 2.044062000 | -0.981112000 | 1.787823000 |
| H | 2.816181000 | -1.732871000 | 1.959146000 |
| H | 1.077128000 | -1.451479000 | 2.022772000 |
| H | 2.080556000 | -0.712748000 | 0.722463000 |

**TS(B-C)**

|   |              |             |              |
|---|--------------|-------------|--------------|
| C | 4.270156000  | 6.545924000 | -1.265967000 |
| C | 2.994017000  | 6.447273000 | -1.872833000 |
| C | 2.955294000  | 7.274448000 | -3.058104000 |
| C | 2.006708000  | 7.567558000 | -4.045813000 |
| H | 1.012825000  | 7.128216000 | -4.013738000 |
| C | 2.354174000  | 8.430576000 | -5.079424000 |
| H | 1.625545000  | 8.663728000 | -5.850998000 |
| C | 3.634390000  | 9.003263000 | -5.146299000 |
| H | 3.881143000  | 9.669484000 | -5.968106000 |
| C | 4.594380000  | 8.729271000 | -4.176613000 |
| H | 5.584941000  | 9.170901000 | -4.235302000 |
| C | 4.236492000  | 7.866771000 | -3.139396000 |
| C | 1.961200000  | 5.622286000 | -1.361011000 |
| H | 1.007050000  | 5.609150000 | -1.900454000 |
| C | 0.922179000  | 4.127538000 | 0.102997000  |
| C | 0.742097000  | 2.815523000 | -0.384416000 |
| C | -0.394347000 | 2.106336000 | 0.017716000  |
| H | -0.552749000 | 1.099461000 | -0.359739000 |
| C | -1.326322000 | 2.665299000 | 0.882890000  |
| H | -2.203794000 | 2.098512000 | 1.182249000  |
| C | -1.130210000 | 3.955135000 | 1.363781000  |
| H | -1.862735000 | 4.387995000 | 2.039171000  |
| C | -0.011961000 | 4.706552000 | 0.991692000  |
| C | 1.720998000  | 2.177555000 | -1.357574000 |
| H | 2.609044000  | 2.816254000 | -1.400589000 |
| C | 1.131718000  | 2.120790000 | -2.774990000 |
| H | 0.226915000  | 1.502846000 | -2.800922000 |
| H | 1.853815000  | 1.691062000 | -3.478060000 |
| H | 0.861276000  | 3.118131000 | -3.136104000 |
| C | 2.180941000  | 0.787167000 | -0.900925000 |
| H | 2.605306000  | 0.819981000 | 0.107144000  |

|   |              |              |              |
|---|--------------|--------------|--------------|
| H | 2.948682000  | 0.400927000  | -1.580034000 |
| H | 1.356904000  | 0.065262000  | -0.894968000 |
| C | 0.158262000  | 6.129583000  | 1.503534000  |
| H | 1.220492000  | 6.384394000  | 1.405271000  |
| C | -0.636087000 | 7.124847000  | 0.642745000  |
| H | -0.323789000 | 7.095813000  | -0.405321000 |
| H | -0.499949000 | 8.149442000  | 1.007271000  |
| H | -1.706850000 | 6.894151000  | 0.676104000  |
| C | -0.217785000 | 6.289078000  | 2.981291000  |
| H | -1.295270000 | 6.177789000  | 3.143923000  |
| H | 0.058909000  | 7.288328000  | 3.334117000  |
| H | 0.294171000  | 5.552738000  | 3.607210000  |
| C | 6.351075000  | 7.829185000  | -1.804957000 |
| H | 6.910563000  | 7.818861000  | -2.747060000 |
| H | 6.799653000  | 7.083538000  | -1.146412000 |
| C | 6.423504000  | 9.237276000  | -1.199019000 |
| H | 5.803576000  | 9.900103000  | -1.812943000 |
| H | 5.968349000  | 9.223991000  | -0.189907000 |
| C | 7.785895000  | 11.221107000 | -1.045874000 |
| H | 7.378017000  | 11.528839000 | -0.059634000 |
| H | 7.125890000  | 11.648285000 | -1.809874000 |
| C | 9.196842000  | 11.782014000 | -1.202808000 |
| H | 9.543469000  | 11.575510000 | -2.223166000 |
| H | 9.172525000  | 12.871253000 | -1.080039000 |
| C | 10.150858000 | 11.140243000 | -0.195712000 |
| H | 9.868555000  | 11.451291000 | 0.820425000  |
| H | 11.178080000 | 11.487130000 | -0.357186000 |
| C | 10.070269000 | 9.617781000  | -0.298657000 |
| H | 10.674212000 | 9.139694000  | 0.481496000  |
| H | 10.470623000 | 9.290715000  | -1.266391000 |
| C | 8.624095000  | 9.139652000  | -0.183047000 |
| H | 8.589038000  | 8.053270000  | -0.311673000 |
| H | 8.244881000  | 9.355298000  | 0.839034000  |
| C | 5.627607000  | 3.102386000  | -0.198102000 |
| H | 5.883019000  | 2.496994000  | 0.689426000  |
| H | 4.847796000  | 2.527750000  | -0.733673000 |
| C | 7.862586000  | 1.380081000  | -1.597909000 |
| H | 8.172983000  | 0.934850000  | -0.646041000 |
| H | 8.737254000  | 1.407204000  | -2.258283000 |
| H | 7.121246000  | 0.712692000  | -2.051813000 |
| C | 8.535966000  | 4.174381000  | -0.576159000 |
| H | 8.238207000  | 5.221862000  | -0.450705000 |
| H | 9.421712000  | 4.156619000  | -1.221273000 |
| H | 8.832175000  | 3.792330000  | 0.407588000  |

|    |             |              |              |
|----|-------------|--------------|--------------|
| C  | 6.683334000 | 3.823356000  | -3.029274000 |
| H  | 5.934636000 | 3.192806000  | -3.522386000 |
| H  | 7.561445000 | 3.869129000  | -3.683157000 |
| H  | 6.261551000 | 4.830141000  | -2.948801000 |
| C  | 3.342533000 | 3.810290000  | 2.724729000  |
| H  | 2.458221000 | 4.453005000  | 2.574901000  |
| H  | 3.163804000 | 2.901808000  | 2.121596000  |
| C  | 4.785546000 | 2.338223000  | 5.103750000  |
| H  | 5.110911000 | 1.585878000  | 4.377465000  |
| H  | 4.592200000 | 1.832099000  | 6.056574000  |
| H  | 5.621691000 | 3.027008000  | 5.265301000  |
| C  | 1.739989000 | 2.108691000  | 4.783392000  |
| H  | 0.810195000 | 2.583929000  | 4.453553000  |
| H  | 1.623728000 | 1.827006000  | 5.836243000  |
| H  | 1.863306000 | 1.188362000  | 4.201743000  |
| C  | 2.995633000 | 4.789282000  | 5.646530000  |
| H  | 3.822384000 | 5.495665000  | 5.518929000  |
| H  | 2.954911000 | 4.501321000  | 6.702858000  |
| H  | 2.066807000 | 5.319061000  | 5.409917000  |
| C  | 7.589188000 | -0.659612000 | 3.290063000  |
| H  | 7.544502000 | -0.574347000 | 4.382682000  |
| H  | 8.558550000 | -0.259850000 | 2.959064000  |
| C  | 7.384495000 | -2.095322000 | 2.798702000  |
| H  | 8.324935000 | -2.644278000 | 2.697446000  |
| H  | 6.742596000 | -2.651076000 | 3.491795000  |
| C  | 6.657629000 | -1.872441000 | 1.470135000  |
| H  | 6.082954000 | -2.740832000 | 1.135666000  |
| H  | 7.370297000 | -1.608797000 | 0.680689000  |
| C  | 5.779467000 | -0.672857000 | 1.810918000  |
| H  | 5.520750000 | -0.056808000 | 0.944549000  |
| H  | 4.845500000 | -0.997550000 | 2.296957000  |
| N  | 4.983849000 | 7.406632000  | -2.051046000 |
| N  | 2.076156000 | 4.877980000  | -0.286798000 |
| N  | 7.777071000 | 9.768382000  | -1.193459000 |
| O  | 6.544289000 | 0.125606000  | 2.713326000  |
| Si | 7.125412000 | 3.120292000  | -1.316853000 |
| Si | 3.228840000 | 3.267255000  | 4.526394000  |
| Y  | 4.389662000 | 4.946526000  | 0.678044000  |
| C  | 4.095149000 | 8.057197000  | 1.790773000  |
| C  | 5.533559000 | 6.941261000  | 3.247445000  |
| H  | 3.536478000 | 8.001502000  | 0.858527000  |
| C  | 4.080001000 | 9.205451000  | 2.557402000  |
| C  | 5.596998000 | 8.099662000  | 4.068791000  |
| H  | 3.495437000 | 10.065466000 | 2.252323000  |

|   |             |              |             |
|---|-------------|--------------|-------------|
| H | 6.204861000 | 8.102029000  | 4.964519000 |
| C | 4.864804000 | 9.213364000  | 3.720711000 |
| H | 4.902216000 | 10.097279000 | 4.351884000 |
| N | 4.800883000 | 6.950520000  | 2.100279000 |
| N | 6.196765000 | 5.801176000  | 3.545140000 |
| C | 7.129424000 | 5.772278000  | 4.656353000 |
| H | 7.550100000 | 4.769862000  | 4.727898000 |
| H | 7.957785000 | 6.481718000  | 4.518315000 |
| H | 6.632010000 | 5.997163000  | 5.607245000 |
| C | 6.109880000 | 4.688927000  | 2.614753000 |
| H | 6.548069000 | 3.801056000  | 3.073530000 |
| H | 4.779455000 | 4.277468000  | 2.658785000 |
| H | 6.727255000 | 4.889814000  | 1.714068000 |

C

|   |              |              |              |
|---|--------------|--------------|--------------|
| C | -0.035521000 | 1.452529000  | -1.909344000 |
| C | -1.386851000 | 1.440497000  | -2.348438000 |
| C | -1.511098000 | 2.278953000  | -3.522370000 |
| C | -2.553246000 | 2.646282000  | -4.382711000 |
| H | -3.562987000 | 2.274113000  | -4.228814000 |
| C | -2.279506000 | 3.497634000  | -5.447669000 |
| H | -3.080647000 | 3.787377000  | -6.121980000 |
| C | -0.982747000 | 3.988094000  | -5.668902000 |
| H | -0.796418000 | 4.649368000  | -6.510331000 |
| C | 0.069309000  | 3.639658000  | -4.827302000 |
| H | 1.071110000  | 4.020092000  | -5.003639000 |
| C | -0.213673000 | 2.786630000  | -3.760046000 |
| C | -2.423145000 | 0.695391000  | -1.727974000 |
| H | -3.410324000 | 0.725994000  | -2.203732000 |
| C | -3.441450000 | -0.746254000 | -0.192144000 |
| C | -3.708952000 | -2.029158000 | -0.719814000 |
| C | -4.835855000 | -2.715789000 | -0.254976000 |
| H | -5.062037000 | -3.698091000 | -0.660803000 |
| C | -5.672682000 | -2.166096000 | 0.708566000  |
| H | -6.544493000 | -2.715611000 | 1.053306000  |
| C | -5.389483000 | -0.907157000 | 1.227483000  |
| H | -6.047275000 | -0.478362000 | 1.978139000  |
| C | -4.278057000 | -0.177752000 | 0.795840000  |
| C | -2.831614000 | -2.660912000 | -1.790389000 |
| H | -1.906807000 | -2.077965000 | -1.850501000 |
| C | -3.507991000 | -2.592299000 | -3.168150000 |
| H | -4.449569000 | -3.153260000 | -3.171269000 |
| H | -2.858017000 | -3.019403000 | -3.939554000 |
| H | -3.736748000 | -1.560730000 | -3.453457000 |

|   |              |              |              |
|---|--------------|--------------|--------------|
| C | -2.434671000 | -4.103712000 | -1.452250000 |
| H | -1.957656000 | -4.166223000 | -0.469771000 |
| H | -1.727326000 | -4.483509000 | -2.197018000 |
| H | -3.298119000 | -4.777842000 | -1.450238000 |
| C | -4.013105000 | 1.215015000  | 1.344024000  |
| H | -2.959205000 | 1.442474000  | 1.153357000  |
| C | -4.851376000 | 2.263259000  | 0.595764000  |
| H | -4.651191000 | 2.246536000  | -0.480089000 |
| H | -4.631715000 | 3.270867000  | 0.965995000  |
| H | -5.922132000 | 2.076776000  | 0.736076000  |
| C | -4.234915000 | 1.328896000  | 2.856206000  |
| H | -5.290826000 | 1.222659000  | 3.128904000  |
| H | -3.909155000 | 2.313619000  | 3.207278000  |
| H | -3.668473000 | 0.569765000  | 3.403438000  |
| C | 2.035641000  | 2.617834000  | -2.667945000 |
| H | 2.480478000  | 2.654578000  | -3.667602000 |
| H | 2.528247000  | 1.812255000  | -2.120861000 |
| C | 2.236829000  | 3.970910000  | -1.972897000 |
| H | 1.670638000  | 4.726082000  | -2.529566000 |
| H | 1.792523000  | 3.925934000  | -0.960380000 |
| C | 3.797562000  | 5.814450000  | -1.834870000 |
| H | 3.414114000  | 6.184663000  | -0.860495000 |
| H | 3.197452000  | 6.294753000  | -2.616467000 |
| C | 5.263204000  | 6.215644000  | -1.984314000 |
| H | 5.595103000  | 5.954726000  | -2.997221000 |
| H | 5.356335000  | 7.303168000  | -1.880129000 |
| C | 6.133987000  | 5.492885000  | -0.956163000 |
| H | 5.880704000  | 5.853642000  | 0.051169000  |
| H | 7.194051000  | 5.722110000  | -1.115339000 |
| C | 5.887344000  | 3.985913000  | -1.028342000 |
| H | 6.428173000  | 3.462119000  | -0.231525000 |
| H | 6.256935000  | 3.595462000  | -1.984798000 |
| C | 4.397021000  | 3.675315000  | -0.917994000 |
| H | 4.239405000  | 2.596866000  | -1.017061000 |
| H | 4.034077000  | 3.960304000  | 0.092767000  |
| C | 1.173360000  | -2.057988000 | -0.685988000 |
| H | 1.568182000  | -2.501670000 | 0.246188000  |
| H | 0.366532000  | -2.733245000 | -1.026427000 |
| C | 3.242718000  | -3.914358000 | -2.197343000 |
| H | 3.667208000  | -4.296759000 | -1.262183000 |
| H | 4.031647000  | -3.939994000 | -2.958271000 |
| H | 2.452528000  | -4.606150000 | -2.510727000 |
| C | 4.017264000  | -1.064698000 | -1.414956000 |
| H | 3.721643000  | -0.014743000 | -1.310167000 |



|    |              |              |              |
|----|--------------|--------------|--------------|
| H  | 4.838461000  | -1.110949000 | -2.138922000 |
| H  | 4.404413000  | -1.393554000 | -0.443855000 |
| C  | 1.941141000  | -1.563257000 | -3.661216000 |
| H  | 1.144702000  | -2.217186000 | -4.035091000 |
| H  | 2.752171000  | -1.575360000 | -4.398144000 |
| H  | 1.536279000  | -0.547149000 | -3.613219000 |
| C  | -1.197173000 | -1.870419000 | 2.556545000  |
| H  | -2.108376000 | -1.631573000 | 1.997606000  |
| H  | -0.478787000 | -2.370695000 | 1.894994000  |
| C  | -0.058315000 | -3.447310000 | 4.972495000  |
| H  | 0.689569000  | -3.923005000 | 4.328654000  |
| H  | -0.279358000 | -4.127672000 | 5.802382000  |
| H  | 0.384916000  | -2.539204000 | 5.395798000  |
| C  | -2.392168000 | -4.621100000 | 3.286472000  |
| H  | -3.274036000 | -4.389245000 | 2.680214000  |
| H  | -2.699306000 | -5.307605000 | 4.082625000  |
| H  | -1.673424000 | -5.147479000 | 2.649770000  |
| C  | -2.890270000 | -2.181967000 | 5.128411000  |
| H  | -2.488711000 | -1.246055000 | 5.531709000  |
| H  | -3.156264000 | -2.822338000 | 5.976308000  |
| H  | -3.810577000 | -1.948332000 | 4.583074000  |
| C  | 3.402657000  | -5.805420000 | 3.488193000  |
| H  | 3.140562000  | -5.885126000 | 4.550248000  |
| H  | 4.354403000  | -5.260256000 | 3.414653000  |
| C  | 3.487425000  | -7.167933000 | 2.794498000  |
| H  | 4.494705000  | -7.592931000 | 2.822280000  |
| H  | 2.806386000  | -7.884100000 | 3.268427000  |
| C  | 3.000876000  | -6.833053000 | 1.382404000  |
| H  | 2.620890000  | -7.699437000 | 0.833816000  |
| H  | 3.807820000  | -6.383096000 | 0.793320000  |
| C  | 1.921786000  | -5.797267000 | 1.679932000  |
| H  | 1.745218000  | -5.096256000 | 0.858457000  |
| H  | 0.967339000  | -6.291149000 | 1.924793000  |
| N  | 0.630795000  | 2.265078000  | -2.775565000 |
| N  | -2.289319000 | -0.022762000 | -0.636103000 |
| N  | 3.635128000  | 4.368305000  | -1.953937000 |
| O  | 2.391437000  | -5.059748000 | 2.807528000  |
| Si | 2.543338000  | -2.151560000 | -1.952328000 |
| Si | -1.628735000 | -3.038869000 | 3.999234000  |
| Y  | 0.117284000  | -0.020687000 | 0.056057000  |
| C  | -0.816877000 | 3.170914000  | 0.973323000  |
| C  | 0.670179000  | 2.249465000  | 2.518761000  |
| H  | -1.331924000 | 3.028012000  | 0.025923000  |
| C  | -0.970968000 | 4.342456000  | 1.689715000  |

|   |              |              |             |
|---|--------------|--------------|-------------|
| C | 0.574133000  | 3.435151000  | 3.303211000 |
| H | -1.613275000 | 5.135604000  | 1.324796000 |
| H | 1.152409000  | 3.537344000  | 4.212568000 |
| C | -0.245794000 | 4.460528000  | 2.885235000 |
| H | -0.315648000 | 5.366295000  | 3.482420000 |
| N | -0.033236000 | 2.145164000  | 1.355317000 |
| N | 1.447155000  | 1.201443000  | 2.871040000 |
| C | 2.268253000  | 1.288994000  | 4.064924000 |
| H | 2.694435000  | 0.303112000  | 4.252384000 |
| H | 3.098172000  | 2.004352000  | 3.953962000 |
| H | 1.679004000  | 1.575826000  | 4.944064000 |
| C | 1.702465000  | 0.139879000  | 1.897460000 |
| H | 1.809637000  | -0.804530000 | 2.448172000 |
| H | -0.744513000 | -0.949745000 | 2.943269000 |
| H | 2.692627000  | 0.322215000  | 1.431146000 |

**D**

|   |              |              |              |
|---|--------------|--------------|--------------|
| C | 0.039938000  | 0.754092000  | -1.497323000 |
| C | -1.225087000 | 0.695312000  | -2.135733000 |
| C | -1.176106000 | 1.447434000  | -3.369776000 |
| C | -2.074639000 | 1.737500000  | -4.403966000 |
| H | -3.095634000 | 1.364935000  | -4.377600000 |
| C | -1.643216000 | 2.511986000  | -5.475617000 |
| H | -2.333428000 | 2.742327000  | -6.282615000 |
| C | -0.328112000 | 2.999606000  | -5.534758000 |
| H | -0.016192000 | 3.598919000  | -6.385464000 |
| C | 0.584110000  | 2.726285000  | -4.519521000 |
| H | 1.601559000  | 3.103053000  | -4.570529000 |
| C | 0.142708000  | 1.952137000  | -3.446008000 |
| C | -2.321773000 | -0.023050000 | -1.601378000 |
| H | -3.260291000 | -0.015552000 | -2.167838000 |
| C | -3.462354000 | -1.389827000 | -0.074672000 |
| C | -3.718732000 | -2.686699000 | -0.576651000 |
| C | -4.865498000 | -3.355899000 | -0.136042000 |
| H | -5.080925000 | -4.348668000 | -0.521645000 |
| C | -5.736394000 | -2.775789000 | 0.778621000  |
| H | -6.623460000 | -3.312015000 | 1.105258000  |
| C | -5.470303000 | -1.500608000 | 1.266436000  |
| H | -6.159441000 | -1.044793000 | 1.972066000  |
| C | -4.339795000 | -0.787498000 | 0.856527000  |
| C | -2.805137000 | -3.346017000 | -1.599056000 |
| H | -1.858822000 | -2.795507000 | -1.600060000 |
| C | -3.401252000 | -3.245929000 | -3.012212000 |
| H | -4.360976000 | -3.772390000 | -3.067900000 |

|   |              |              |              |
|---|--------------|--------------|--------------|
| H | -2.726193000 | -3.693186000 | -3.749866000 |
| H | -3.576729000 | -2.206252000 | -3.304065000 |
| C | -2.483293000 | -4.807419000 | -1.261346000 |
| H | -2.080284000 | -4.908499000 | -0.249096000 |
| H | -1.736803000 | -5.198814000 | -1.960095000 |
| H | -3.366080000 | -5.451694000 | -1.337013000 |
| C | -4.101531000 | 0.627291000  | 1.359717000  |
| H | -3.045038000 | 0.860126000  | 1.190182000  |
| C | -4.930181000 | 1.637124000  | 0.550221000  |
| H | -4.696085000 | 1.583219000  | -0.517322000 |
| H | -4.731952000 | 2.660695000  | 0.887385000  |
| H | -6.002732000 | 1.443104000  | 0.665933000  |
| C | -4.369753000 | 0.788872000  | 2.860056000  |
| H | -5.430267000 | 0.666899000  | 3.107270000  |
| H | -4.076553000 | 1.791969000  | 3.187587000  |
| H | -3.800707000 | 0.060997000  | 3.446566000  |
| C | 2.201311000  | 1.888886000  | -2.023024000 |
| H | 2.798979000  | 1.814377000  | -2.938249000 |
| H | 2.587725000  | 1.159388000  | -1.309009000 |
| C | 2.301300000  | 3.320017000  | -1.477171000 |
| H | 1.722535000  | 3.973486000  | -2.139288000 |
| H | 1.812179000  | 3.362833000  | -0.484411000 |
| C | 3.726755000  | 5.264372000  | -1.381076000 |
| H | 3.301506000  | 5.640204000  | -0.426010000 |
| H | 3.105958000  | 5.672437000  | -2.187172000 |
| C | 5.161961000  | 5.765782000  | -1.524012000 |
| H | 5.529226000  | 5.491721000  | -2.521068000 |
| H | 5.175289000  | 6.860310000  | -1.460185000 |
| C | 6.063701000  | 5.145869000  | -0.456292000 |
| H | 5.767182000  | 5.524247000  | 0.532713000  |
| H | 7.107499000  | 5.445072000  | -0.607549000 |
| C | 5.926222000  | 3.623656000  | -0.476022000 |
| H | 6.488802000  | 3.168991000  | 0.347804000  |
| H | 6.340630000  | 3.227421000  | -1.411644000 |
| C | 4.460120000  | 3.208729000  | -0.377014000 |
| H | 4.383083000  | 2.119102000  | -0.437917000 |
| H | 4.060579000  | 3.500045000  | 0.617199000  |
| C | 1.116112000  | -2.664392000 | 0.242533000  |
| H | 1.642136000  | -2.999300000 | 1.154307000  |
| H | 0.209423000  | -3.304940000 | 0.196190000  |
| C | 2.434964000  | -5.106048000 | -1.262056000 |
| H | 2.995975000  | -5.416155000 | -0.372861000 |
| H | 3.008123000  | -5.414565000 | -2.144453000 |
| H | 1.490841000  | -5.662885000 | -1.265329000 |

|    |              |              |              |
|----|--------------|--------------|--------------|
| C  | 3.841165000  | -2.407786000 | -1.335444000 |
| H  | 3.781000000  | -1.315668000 | -1.393268000 |
| H  | 4.369261000  | -2.756994000 | -2.230059000 |
| H  | 4.461884000  | -2.669760000 | -0.470447000 |
| C  | 1.211938000  | -2.800552000 | -2.867084000 |
| H  | 0.245036000  | -3.313180000 | -2.924613000 |
| H  | 1.801160000  | -3.111148000 | -3.737385000 |
| H  | 1.023011000  | -1.725147000 | -2.949238000 |
| C  | -0.409598000 | -1.536990000 | 3.870700000  |
| H  | -0.409252000 | -0.458508000 | 4.037133000  |
| H  | 0.627768000  | -1.896980000 | 3.856930000  |
| C  | -1.260681000 | -2.339535000 | 4.839619000  |
| H  | -0.737656000 | -2.556244000 | 5.775015000  |
| H  | -2.182478000 | -1.797029000 | 5.076766000  |
| C  | -1.564352000 | -3.591840000 | 4.012905000  |
| H  | -2.456904000 | -4.126197000 | 4.348544000  |
| H  | -0.718203000 | -4.285987000 | 4.056072000  |
| C  | -1.730251000 | -3.033838000 | 2.599074000  |
| H  | -1.306279000 | -3.688155000 | 1.832638000  |
| H  | -2.773098000 | -2.817732000 | 2.351330000  |
| N  | 0.828356000  | 1.514115000  | -2.308844000 |
| N  | -2.282287000 | -0.693286000 | -0.472834000 |
| N  | 3.670520000  | 3.807732000  | -1.449975000 |
| O  | -1.009389000 | -1.774393000 | 2.578126000  |
| Si | 2.112990000  | -3.220214000 | -1.242068000 |
| Y  | -0.038146000 | -0.524537000 | 0.640455000  |
| C  | 1.953042000  | 1.246450000  | 2.739738000  |
| C  | 3.207093000  | -0.416920000 | 1.685948000  |
| C  | 3.131192000  | 1.700367000  | 3.400042000  |
| C  | 4.383088000  | -0.045273000 | 2.310028000  |
| H  | 3.090407000  | 2.553383000  | 4.065047000  |
| H  | 5.304981000  | -0.580946000 | 2.115314000  |
| C  | 4.326526000  | 1.049785000  | 3.183409000  |
| H  | 5.223386000  | 1.396171000  | 3.691138000  |
| N  | 2.021930000  | 0.197967000  | 1.867943000  |
| N  | 0.744880000  | 1.814913000  | 2.949857000  |
| H  | 3.180231000  | -1.250581000 | 0.992687000  |
| C  | 0.647642000  | 2.975023000  | 3.818735000  |
| H  | 1.150358000  | 3.859610000  | 3.398646000  |
| H  | -0.409163000 | 3.212821000  | 3.940146000  |
| H  | 1.069095000  | 2.780828000  | 4.813592000  |
| C  | -0.402424000 | 1.422895000  | 2.130809000  |
| H  | -0.630066000 | 2.259341000  | 1.440161000  |
| H  | -1.275371000 | 1.350809000  | 2.799096000  |

**TS(D-E)**

|   |              |              |              |
|---|--------------|--------------|--------------|
| C | -0.301208000 | 1.696335000  | -1.606233000 |
| C | -1.658565000 | 1.796994000  | -2.197301000 |
| C | -1.670232000 | 2.906406000  | -3.133725000 |
| C | -2.644333000 | 3.503987000  | -3.933963000 |
| H | -3.673762000 | 3.154893000  | -3.904956000 |
| C | -2.283572000 | 4.548160000  | -4.791464000 |
| H | -3.039771000 | 5.013426000  | -5.418211000 |
| C | -0.961709000 | 4.990803000  | -4.858101000 |
| H | -0.695107000 | 5.796387000  | -5.537076000 |
| C | 0.031733000  | 4.411638000  | -4.058246000 |
| H | 1.060495000  | 4.754721000  | -4.122536000 |
| C | -0.339648000 | 3.385046000  | -3.195224000 |
| C | -2.667385000 | 0.932811000  | -1.850919000 |
| H | -3.655106000 | 1.042074000  | -2.306613000 |
| C | -3.612349000 | -0.880671000 | -0.633459000 |
| C | -3.701449000 | -2.199149000 | -1.153694000 |
| C | -4.769029000 | -3.013607000 | -0.764840000 |
| H | -4.841932000 | -4.022583000 | -1.161460000 |
| C | -5.753664000 | -2.552922000 | 0.103315000  |
| H | -6.579035000 | -3.199794000 | 0.389249000  |
| C | -5.683122000 | -1.250538000 | 0.582864000  |
| H | -6.466289000 | -0.882337000 | 1.241834000  |
| C | -4.629150000 | -0.399744000 | 0.231645000  |
| C | -2.704753000 | -2.694486000 | -2.189621000 |
| H | -1.784716000 | -2.114857000 | -2.057681000 |
| C | -3.219735000 | -2.393200000 | -3.606391000 |
| H | -4.164080000 | -2.916574000 | -3.796558000 |
| H | -2.493284000 | -2.716782000 | -4.360389000 |
| H | -3.393545000 | -1.322241000 | -3.743836000 |
| C | -2.347643000 | -4.177898000 | -2.051356000 |
| H | -2.015475000 | -4.424429000 | -1.037269000 |
| H | -1.537603000 | -4.434726000 | -2.741831000 |
| H | -3.193634000 | -4.830822000 | -2.294336000 |
| C | -4.621114000 | 1.024030000  | 0.767973000  |
| H | -3.665184000 | 1.473942000  | 0.484759000  |
| C | -5.734442000 | 1.865525000  | 0.126030000  |
| H | -5.639175000 | 1.886003000  | -0.963491000 |
| H | -5.698940000 | 2.899223000  | 0.488616000  |
| H | -6.724140000 | 1.459610000  | 0.364828000  |
| C | -4.725555000 | 1.078583000  | 2.297894000  |
| H | -5.686368000 | 0.693236000  | 2.656538000  |
| H | -4.636169000 | 2.111956000  | 2.652005000  |

|   |              |              |              |
|---|--------------|--------------|--------------|
| H | -3.935001000 | 0.486695000  | 2.769823000  |
| C | 1.898891000  | 2.644832000  | -2.420126000 |
| H | 2.189277000  | 2.686241000  | -3.479613000 |
| H | 2.261353000  | 1.696577000  | -2.015690000 |
| C | 2.552957000  | 3.843569000  | -1.712337000 |
| H | 1.902221000  | 4.713413000  | -1.855971000 |
| H | 2.594698000  | 3.651037000  | -0.622037000 |
| C | 4.312223000  | 5.481263000  | -1.778313000 |
| H | 4.450526000  | 5.483342000  | -0.674693000 |
| H | 3.529108000  | 6.215787000  | -2.001131000 |
| C | 5.621042000  | 5.894708000  | -2.446373000 |
| H | 5.443086000  | 6.008923000  | -3.523009000 |
| H | 5.935693000  | 6.872279000  | -2.061910000 |
| C | 6.703869000  | 4.841385000  | -2.213119000 |
| H | 6.961719000  | 4.816721000  | -1.144386000 |
| H | 7.622221000  | 5.100711000  | -2.752762000 |
| C | 6.192415000  | 3.466203000  | -2.640623000 |
| H | 6.919299000  | 2.683560000  | -2.393654000 |
| H | 6.050280000  | 3.447388000  | -3.728451000 |
| C | 4.858094000  | 3.147689000  | -1.969464000 |
| H | 4.486349000  | 2.184977000  | -2.333458000 |
| H | 5.013533000  | 3.038342000  | -0.873896000 |
| C | 0.950823000  | -2.115793000 | -0.580397000 |
| H | 1.363862000  | -2.534871000 | 0.356825000  |
| H | 0.188416000  | -2.847034000 | -0.907408000 |
| C | 2.960184000  | -3.945002000 | -2.194169000 |
| H | 3.351590000  | -4.400545000 | -1.277425000 |
| H | 3.762093000  | -3.953149000 | -2.941629000 |
| H | 2.152963000  | -4.587746000 | -2.563274000 |
| C | 3.821029000  | -1.161638000 | -1.263318000 |
| H | 3.547098000  | -0.123799000 | -1.044453000 |
| H | 4.615715000  | -1.148143000 | -2.017588000 |
| H | 4.242773000  | -1.592611000 | -0.347638000 |
| C | 1.719349000  | -1.472885000 | -3.521886000 |
| H | 0.895869000  | -2.075427000 | -3.922140000 |
| H | 2.521099000  | -1.471231000 | -4.268973000 |
| H | 1.351295000  | -0.447267000 | -3.412034000 |
| C | -1.123447000 | -0.474182000 | 3.412605000  |
| H | -1.575402000 | 0.521402000  | 3.425904000  |
| H | -0.063074000 | -0.383485000 | 3.671485000  |
| C | -1.845166000 | -1.482422000 | 4.300383000  |
| H | -1.431441000 | -1.507017000 | 5.311933000  |
| H | -2.910210000 | -1.238563000 | 4.374251000  |
| C | -1.654280000 | -2.793051000 | 3.533129000  |

|    |              |              |              |
|----|--------------|--------------|--------------|
| H  | -2.389858000 | -3.557153000 | 3.796728000  |
| H  | -0.653785000 | -3.203082000 | 3.710391000  |
| C  | -1.797064000 | -2.333771000 | 2.091098000  |
| H  | -1.245190000 | -2.944826000 | 1.372239000  |
| H  | -2.843710000 | -2.259948000 | 1.778141000  |
| N  | 0.456086000  | 2.626569000  | -2.327381000 |
| N  | -2.489369000 | -0.075623000 | -0.951818000 |
| N  | 3.862707000  | 4.177597000  | -2.251834000 |
| O  | -1.214428000 | -1.001295000 | 2.066182000  |
| Si | 2.318663000  | -2.177288000 | -1.859219000 |
| Y  | -0.304131000 | -0.102341000 | -0.078867000 |
| C  | 1.254516000  | 2.437493000  | 1.611611000  |
| C  | 2.143856000  | 0.316450000  | 2.031497000  |
| C  | 2.220548000  | 3.004965000  | 2.490850000  |
| C  | 3.127666000  | 0.801604000  | 2.865674000  |
| H  | 2.224962000  | 4.069819000  | 2.684113000  |
| H  | 3.849967000  | 0.132679000  | 3.318462000  |
| C  | 3.143175000  | 2.188257000  | 3.102665000  |
| H  | 3.881080000  | 2.622135000  | 3.772032000  |
| N  | 1.210943000  | 1.085826000  | 1.428032000  |
| N  | 0.342848000  | 3.185340000  | 0.951436000  |
| H  | 2.077179000  | -0.747451000 | 1.812582000  |
| C  | 0.354711000  | 4.631606000  | 1.101714000  |
| H  | 1.361294000  | 5.037172000  | 0.959632000  |
| H  | -0.287487000 | 5.062798000  | 0.334626000  |
| H  | -0.021088000 | 4.945471000  | 2.085922000  |
| C  | -0.718217000 | 2.568962000  | 0.198708000  |
| H  | -1.296034000 | 3.347488000  | -0.289819000 |
| H  | -1.413894000 | 2.034802000  | 0.875716000  |

**E**

|   |              |              |              |
|---|--------------|--------------|--------------|
| C | -0.003536000 | 1.184439000  | -0.583096000 |
| C | -1.120359000 | 0.653493000  | -1.423127000 |
| C | -0.841484000 | 1.067634000  | -2.800724000 |
| C | -1.492255000 | 0.817536000  | -4.006454000 |
| H | -2.396971000 | 0.215467000  | -4.031996000 |
| C | -0.961284000 | 1.325643000  | -5.194370000 |
| H | -1.464532000 | 1.133419000  | -6.137548000 |
| C | 0.228113000  | 2.057063000  | -5.173617000 |
| H | 0.647090000  | 2.429754000  | -6.104775000 |
| C | 0.895153000  | 2.319967000  | -3.975388000 |
| H | 1.822210000  | 2.884673000  | -3.978142000 |
| C | 0.334146000  | 1.848179000  | -2.783913000 |
| C | -2.178233000 | -0.179358000 | -1.073590000 |

|   |              |              |              |
|---|--------------|--------------|--------------|
| H | -2.871779000 | -0.444666000 | -1.873039000 |
| C | -3.591029000 | -1.393429000 | 0.461905000  |
| C | -4.026210000 | -2.555460000 | -0.232126000 |
| C | -5.233608000 | -3.157264000 | 0.143486000  |
| H | -5.570104000 | -4.041493000 | -0.392771000 |
| C | -6.005693000 | -2.661449000 | 1.184742000  |
| H | -6.936646000 | -3.149635000 | 1.460521000  |
| C | -5.577389000 | -1.525872000 | 1.866076000  |
| H | -6.188878000 | -1.128785000 | 2.671302000  |
| C | -4.391865000 | -0.876059000 | 1.518204000  |
| C | -3.238556000 | -3.181945000 | -1.375681000 |
| H | -2.268242000 | -2.677478000 | -1.434666000 |
| C | -3.952011000 | -2.983111000 | -2.722593000 |
| H | -4.913321000 | -3.509371000 | -2.735064000 |
| H | -3.344372000 | -3.374689000 | -3.545966000 |
| H | -4.157403000 | -1.927187000 | -2.922862000 |
| C | -2.955830000 | -4.675549000 | -1.155604000 |
| H | -2.431682000 | -4.854690000 | -0.212456000 |
| H | -2.329949000 | -5.065598000 | -1.965598000 |
| H | -3.878265000 | -5.266015000 | -1.141496000 |
| C | -3.994047000 | 0.423620000  | 2.200614000  |
| H | -2.898449000 | 0.434888000  | 2.241887000  |
| C | -4.422215000 | 1.625015000  | 1.342005000  |
| H | -3.982500000 | 1.569859000  | 0.342548000  |
| H | -4.107939000 | 2.568919000  | 1.803986000  |
| H | -5.512609000 | 1.649516000  | 1.233706000  |
| C | -4.520915000 | 0.577423000  | 3.630055000  |
| H | -5.609317000 | 0.701952000  | 3.656696000  |
| H | -4.088545000 | 1.470364000  | 4.094838000  |
| H | -4.269931000 | -0.285463000 | 4.256546000  |
| C | 2.220070000  | 2.232003000  | -1.274033000 |
| H | 2.814843000  | 1.754743000  | -2.068631000 |
| H | 2.495736000  | 1.753623000  | -0.331681000 |
| C | 2.563105000  | 3.728187000  | -1.258075000 |
| H | 2.066577000  | 4.196335000  | -2.114732000 |
| H | 2.121815000  | 4.197730000  | -0.356370000 |
| C | 4.250563000  | 5.387041000  | -1.708994000 |
| H | 3.917308000  | 6.067367000  | -0.895364000 |
| H | 3.659519000  | 5.643002000  | -2.596139000 |
| C | 5.733396000  | 5.623250000  | -1.984086000 |
| H | 6.022461000  | 5.040642000  | -2.867795000 |
| H | 5.897325000  | 6.680929000  | -2.222164000 |
| C | 6.581650000  | 5.195651000  | -0.786713000 |
| H | 6.374068000  | 5.863762000  | 0.061790000  |



|    |              |              |              |
|----|--------------|--------------|--------------|
| H  | 7.650241000  | 5.294154000  | -1.010838000 |
| C  | 6.239608000  | 3.758930000  | -0.393857000 |
| H  | 6.768839000  | 3.466436000  | 0.520937000  |
| H  | 6.558682000  | 3.072744000  | -1.188263000 |
| C  | 4.735526000  | 3.593462000  | -0.185675000 |
| H  | 4.512279000  | 2.546800000  | 0.042152000  |
| H  | 4.420763000  | 4.189823000  | 0.699971000  |
| C  | 0.948415000  | -3.027208000 | -0.622059000 |
| H  | 1.372436000  | -3.571019000 | 0.244487000  |
| H  | 0.149448000  | -3.683223000 | -1.012509000 |
| C  | 2.990384000  | -4.690971000 | -2.357842000 |
| H  | 3.413704000  | -5.178937000 | -1.472312000 |
| H  | 3.778866000  | -4.631804000 | -3.117278000 |
| H  | 2.199100000  | -5.341816000 | -2.746865000 |
| C  | 3.765279000  | -1.923096000 | -1.293848000 |
| H  | 3.466087000  | -0.884888000 | -1.110859000 |
| H  | 4.584138000  | -1.909346000 | -2.021813000 |
| H  | 4.161894000  | -2.330325000 | -0.356152000 |
| C  | 1.647889000  | -2.193182000 | -3.534662000 |
| H  | 0.813190000  | -2.778659000 | -3.937035000 |
| H  | 2.429857000  | -2.162296000 | -4.301692000 |
| H  | 1.289453000  | -1.169677000 | -3.381758000 |
| C  | -0.859880000 | -1.760600000 | 3.708550000  |
| H  | -1.313601000 | -0.771886000 | 3.602593000  |
| H  | 0.100832000  | -1.655648000 | 4.224619000  |
| C  | -1.773490000 | -2.772464000 | 4.394400000  |
| H  | -1.615399000 | -2.801763000 | 5.475698000  |
| H  | -2.823335000 | -2.526837000 | 4.205707000  |
| C  | -1.409393000 | -4.079849000 | 3.687142000  |
| H  | -2.188888000 | -4.842054000 | 3.764267000  |
| H  | -0.477948000 | -4.496045000 | 4.087591000  |
| C  | -1.213763000 | -3.601456000 | 2.258546000  |
| H  | -0.543810000 | -4.217447000 | 1.655112000  |
| H  | -2.172356000 | -3.483365000 | 1.740376000  |
| N  | 0.803224000  | 1.999592000  | -1.490094000 |
| N  | -2.371418000 | -0.742957000 | 0.176842000  |
| N  | 3.988900000  | 3.991948000  | -1.372982000 |
| O  | -0.597003000 | -2.294966000 | 2.387206000  |
| Si | 2.294884000  | -2.965281000 | -1.922981000 |
| Y  | -0.128172000 | -1.063492000 | 0.275729000  |
| C  | 1.406418000  | 1.429901000  | 2.222679000  |
| C  | 2.138930000  | -0.763144000 | 2.525093000  |
| C  | 2.403937000  | 1.869212000  | 3.136068000  |
| C  | 3.150980000  | -0.403869000 | 3.394114000  |

|   |              |              |             |
|---|--------------|--------------|-------------|
| H | 2.501323000  | 2.919393000  | 3.374580000 |
| H | 3.813922000  | -1.152183000 | 3.812484000 |
| C | 3.265851000  | 0.955031000  | 3.706756000 |
| H | 4.031674000  | 1.300498000  | 4.395911000 |
| N | 1.278270000  | 0.102376000  | 1.951450000 |
| N | 0.576885000  | 2.317633000  | 1.612929000 |
| H | 1.987876000  | -1.809264000 | 2.264047000 |
| C | 0.591795000  | 3.700679000  | 2.057158000 |
| H | 1.563823000  | 4.176594000  | 1.883121000 |
| H | -0.151534000 | 4.257906000  | 1.488335000 |
| H | 0.346018000  | 3.791444000  | 3.124366000 |
| C | -0.477898000 | 1.903840000  | 0.666847000 |
| H | -1.020016000 | 2.821999000  | 0.404847000 |
| H | -1.212781000 | 1.271901000  | 1.193953000 |

**TS(E-F)**

|   |              |              |              |
|---|--------------|--------------|--------------|
| C | -0.067112000 | 1.086312000  | -1.168264000 |
| C | -1.107012000 | 0.430877000  | -1.981080000 |
| C | -0.659364000 | 0.555317000  | -3.371057000 |
| C | -1.226622000 | 0.159646000  | -4.579868000 |
| H | -2.182949000 | -0.356815000 | -4.596808000 |
| C | -0.558594000 | 0.429487000  | -5.776944000 |
| H | -0.998314000 | 0.124366000  | -6.721745000 |
| C | 0.676566000  | 1.083635000  | -5.760037000 |
| H | 1.190458000  | 1.284309000  | -6.696541000 |
| C | 1.266967000  | 1.490435000  | -4.563424000 |
| H | 2.225393000  | 2.000813000  | -4.566855000 |
| C | 0.587476000  | 1.227435000  | -3.367778000 |
| C | -2.239217000 | -0.269962000 | -1.562114000 |
| H | -2.906882000 | -0.636119000 | -2.346343000 |
| C | -3.820823000 | -1.037151000 | 0.073869000  |
| C | -4.306202000 | -2.301960000 | -0.349701000 |
| C | -5.588626000 | -2.704136000 | 0.043954000  |
| H | -5.962005000 | -3.671922000 | -0.283506000 |
| C | -6.390857000 | -1.906341000 | 0.847681000  |
| H | -7.381138000 | -2.242887000 | 1.142947000  |
| C | -5.912305000 | -0.669723000 | 1.269635000  |
| H | -6.542259000 | -0.042102000 | 1.893918000  |
| C | -4.647107000 | -0.217358000 | 0.891737000  |
| C | -3.488308000 | -3.259552000 | -1.202908000 |
| H | -2.502488000 | -2.812997000 | -1.375706000 |
| C | -4.132541000 | -3.482514000 | -2.579103000 |
| H | -5.112110000 | -3.964715000 | -2.484778000 |
| H | -3.501849000 | -4.124068000 | -3.203302000 |

|   |              |              |              |
|---|--------------|--------------|--------------|
| H | -4.283198000 | -2.536362000 | -3.108217000 |
| C | -3.254838000 | -4.601015000 | -0.493294000 |
| H | -2.765201000 | -4.455186000 | 0.474825000  |
| H | -2.616194000 | -5.251130000 | -1.100952000 |
| H | -4.196636000 | -5.132078000 | -0.316199000 |
| C | -4.166683000 | 1.165200000  | 1.297631000  |
| H | -3.075626000 | 1.093340000  | 1.370095000  |
| C | -4.480891000 | 2.189202000  | 0.195246000  |
| H | -4.030463000 | 1.893837000  | -0.756514000 |
| H | -4.098406000 | 3.182313000  | 0.460856000  |
| H | -5.563333000 | 2.274429000  | 0.045896000  |
| C | -4.703745000 | 1.647125000  | 2.648301000  |
| H | -5.778260000 | 1.858791000  | 2.612744000  |
| H | -4.208401000 | 2.580101000  | 2.939673000  |
| H | -4.535281000 | 0.910096000  | 3.440977000  |
| C | 2.132314000  | 2.275241000  | -1.725667000 |
| H | 2.981907000  | 1.935421000  | -2.330811000 |
| H | 2.387154000  | 2.044206000  | -0.686967000 |
| C | 1.969282000  | 3.790956000  | -1.934358000 |
| H | 1.693424000  | 3.953879000  | -2.981887000 |
| H | 1.117696000  | 4.163663000  | -1.331304000 |
| C | 3.275776000  | 5.783502000  | -2.384890000 |
| H | 2.493613000  | 6.493155000  | -2.041396000 |
| H | 3.083219000  | 5.587326000  | -3.445820000 |
| C | 4.649332000  | 6.428258000  | -2.215249000 |
| H | 5.401689000  | 5.772104000  | -2.670783000 |
| H | 4.675629000  | 7.381078000  | -2.756973000 |
| C | 4.974775000  | 6.634574000  | -0.735862000 |
| H | 4.291523000  | 7.386845000  | -0.316163000 |
| H | 5.990603000  | 7.027589000  | -0.611876000 |
| C | 4.804684000  | 5.320155000  | 0.025864000  |
| H | 4.938359000  | 5.473286000  | 1.103517000  |
| H | 5.568073000  | 4.602347000  | -0.299776000 |
| C | 3.426594000  | 4.716987000  | -0.236331000 |
| H | 3.343603000  | 3.753655000  | 0.277700000  |
| H | 2.647107000  | 5.380797000  | 0.197471000  |
| C | 0.557261000  | -3.327411000 | -0.995423000 |
| H | 1.364095000  | -3.553198000 | -0.270111000 |
| H | -0.222587000 | -4.085608000 | -0.796924000 |
| C | 2.030171000  | -5.472620000 | -2.758398000 |
| H | 2.841611000  | -5.571799000 | -2.027866000 |
| H | 2.443304000  | -5.695945000 | -3.749067000 |
| H | 1.283237000  | -6.240606000 | -2.526709000 |
| C | 2.629654000  | -2.502115000 | -3.185297000 |

|    |              |              |              |
|----|--------------|--------------|--------------|
| H  | 2.251248000  | -1.475406000 | -3.229580000 |
| H  | 3.031107000  | -2.750451000 | -4.174247000 |
| H  | 3.467479000  | -2.529529000 | -2.478330000 |
| C  | -0.102915000 | -3.662912000 | -4.016947000 |
| H  | -0.925667000 | -4.341487000 | -3.765143000 |
| H  | 0.287563000  | -3.962037000 | -4.996004000 |
| H  | -0.510369000 | -2.651552000 | -4.114420000 |
| C  | 0.102440000  | -3.489721000 | 2.480331000  |
| H  | 1.139263000  | -3.148998000 | 2.416768000  |
| H  | -0.016413000 | -4.378536000 | 1.852723000  |
| C  | -0.380731000 | -3.716678000 | 3.908805000  |
| H  | -0.218183000 | -4.746489000 | 4.237222000  |
| H  | 0.144283000  | -3.051731000 | 4.603654000  |
| C  | -1.859731000 | -3.332249000 | 3.819955000  |
| H  | -2.299800000 | -3.077041000 | 4.787511000  |
| H  | -2.445794000 | -4.147503000 | 3.382200000  |
| C  | -1.817108000 | -2.142716000 | 2.874209000  |
| H  | -2.732320000 | -1.986257000 | 2.299828000  |
| H  | -1.560960000 | -1.216412000 | 3.402414000  |
| N  | 0.958384000  | 1.522554000  | -2.080283000 |
| N  | -2.527118000 | -0.564995000 | -0.246604000 |
| N  | 3.200127000  | 4.516408000  | -1.663522000 |
| O  | -0.752425000 | -2.449328000 | 1.941366000  |
| Si | 1.254807000  | -3.725331000 | -2.687204000 |
| Y  | -0.300459000 | -1.237721000 | -0.134291000 |
| C  | 1.578310000  | 0.442513000  | 1.565846000  |
| C  | 3.158479000  | -0.941381000 | 0.540363000  |
| C  | 2.591185000  | 1.079143000  | 2.311310000  |
| C  | 4.200883000  | -0.366754000 | 1.243081000  |
| H  | 2.343242000  | 1.877946000  | 3.001833000  |
| H  | 5.217648000  | -0.713385000 | 1.094363000  |
| C  | 3.902258000  | 0.660820000  | 2.154711000  |
| H  | 4.694836000  | 1.128481000  | 2.732410000  |
| N  | 1.874454000  | -0.567948000 | 0.699396000  |
| N  | 0.238204000  | 0.750480000  | 1.554139000  |
| H  | 3.329493000  | -1.744432000 | -0.171053000 |
| C  | -0.254613000 | 1.514601000  | 2.686116000  |
| H  | 0.141437000  | 2.542895000  | 2.724398000  |
| H  | -1.343396000 | 1.586954000  | 2.623049000  |
| H  | 0.000690000  | 1.017559000  | 3.627960000  |
| C  | -0.253678000 | 1.683212000  | 0.115922000  |
| H  | 0.315403000  | 2.596952000  | 0.297993000  |
| H  | -1.296481000 | 1.785668000  | 0.406047000  |

**F**

|   |              |              |              |
|---|--------------|--------------|--------------|
| C | 0.112764000  | 1.361513000  | -1.361680000 |
| C | -1.150105000 | 0.923788000  | -1.884687000 |
| C | -1.162990000 | 1.252571000  | -3.298491000 |
| C | -2.095014000 | 1.108805000  | -4.328280000 |
| H | -3.076091000 | 0.682012000  | -4.136609000 |
| C | -1.755783000 | 1.525213000  | -5.615476000 |
| H | -2.479840000 | 1.422214000  | -6.418851000 |
| C | -0.496941000 | 2.070462000  | -5.887289000 |
| H | -0.252615000 | 2.387327000  | -6.897050000 |
| C | 0.455110000  | 2.213284000  | -4.875744000 |
| H | 1.432696000  | 2.634291000  | -5.090937000 |
| C | 0.103307000  | 1.801844000  | -3.595361000 |
| C | -2.153050000 | 0.232719000  | -1.198332000 |
| H | -3.099989000 | 0.122883000  | -1.738768000 |
| C | -3.319833000 | -0.867951000 | 0.492705000  |
| C | -3.713942000 | -2.181941000 | 0.148403000  |
| C | -4.910392000 | -2.680457000 | 0.677898000  |
| H | -5.228146000 | -3.685840000 | 0.414052000  |
| C | -5.704982000 | -1.915428000 | 1.521828000  |
| H | -6.631685000 | -2.321467000 | 1.918666000  |
| C | -5.313926000 | -0.619924000 | 1.844563000  |
| H | -5.947592000 | -0.020711000 | 2.491957000  |
| C | -4.129447000 | -0.073031000 | 1.342170000  |
| C | -2.909959000 | -3.049035000 | -0.808390000 |
| H | -1.938058000 | -2.569573000 | -0.962314000 |
| C | -3.600145000 | -3.138668000 | -2.178299000 |
| H | -4.586997000 | -3.607732000 | -2.091047000 |
| H | -3.001583000 | -3.737783000 | -2.872853000 |
| H | -3.741903000 | -2.149410000 | -2.623613000 |
| C | -2.643569000 | -4.452325000 | -0.248873000 |
| H | -2.170792000 | -4.399037000 | 0.735777000  |
| H | -1.976240000 | -5.005579000 | -0.917865000 |
| H | -3.565195000 | -5.036985000 | -0.151242000 |
| C | -3.758572000 | 1.368156000  | 1.658021000  |
| H | -2.670975000 | 1.451698000  | 1.548855000  |
| C | -4.392906000 | 2.329326000  | 0.639302000  |
| H | -4.076644000 | 2.101224000  | -0.382357000 |
| H | -4.108066000 | 3.365068000  | 0.855738000  |
| H | -5.486296000 | 2.263459000  | 0.675022000  |
| C | -4.122324000 | 1.796847000  | 3.083992000  |
| H | -5.205589000 | 1.879717000  | 3.224320000  |
| H | -3.698727000 | 2.783900000  | 3.297677000  |
| H | -3.741028000 | 1.094037000  | 3.831694000  |

|   |              |              |              |
|---|--------------|--------------|--------------|
| C | 2.151628000  | 2.474250000  | -2.305808000 |
| H | 2.713507000  | 2.285852000  | -3.224747000 |
| H | 2.706141000  | 1.988497000  | -1.500129000 |
| C | 2.040880000  | 3.987047000  | -2.073296000 |
| H | 1.529067000  | 4.425467000  | -2.937203000 |
| H | 1.393615000  | 4.174617000  | -1.195837000 |
| C | 3.351594000  | 6.007653000  | -2.349301000 |
| H | 2.712852000  | 6.623345000  | -1.681591000 |
| H | 2.919036000  | 6.074952000  | -3.354323000 |
| C | 4.769000000  | 6.575194000  | -2.351347000 |
| H | 5.359270000  | 6.039148000  | -3.105256000 |
| H | 4.738924000  | 7.629998000  | -2.649015000 |
| C | 5.421390000  | 6.414519000  | -0.978685000 |
| H | 4.894362000  | 7.047286000  | -0.250281000 |
| H | 6.461830000  | 6.758885000  | -1.000609000 |
| C | 5.341874000  | 4.956042000  | -0.529886000 |
| H | 5.719137000  | 4.839233000  | 0.492749000  |
| H | 5.966921000  | 4.332997000  | -1.181790000 |
| C | 3.903887000  | 4.448655000  | -0.600001000 |
| H | 3.873737000  | 3.390082000  | -0.321048000 |
| H | 3.285347000  | 4.992557000  | 0.145241000  |
| C | 1.057309000  | -2.757008000 | -0.062987000 |
| H | 1.726769000  | -3.207905000 | 0.691464000  |
| H | 0.236601000  | -3.487543000 | -0.189651000 |
| C | 2.840703000  | -4.431598000 | -2.047425000 |
| H | 3.538898000  | -4.711396000 | -1.249965000 |
| H | 3.401268000  | -4.408898000 | -2.989405000 |
| H | 2.091341000  | -5.227815000 | -2.123248000 |
| C | 3.407858000  | -1.452812000 | -1.633794000 |
| H | 2.994265000  | -0.452245000 | -1.471034000 |
| H | 3.971817000  | -1.441274000 | -2.573124000 |
| H | 4.115056000  | -1.656950000 | -0.821778000 |
| C | 0.864437000  | -2.361650000 | -3.140720000 |
| H | 0.076683000  | -3.119480000 | -3.223097000 |
| H | 1.415820000  | -2.355177000 | -4.087513000 |
| H | 0.378830000  | -1.386812000 | -3.028827000 |
| C | -0.169956000 | -3.680865000 | 3.062897000  |
| H | 0.886612000  | -3.413285000 | 2.999195000  |
| H | -0.366715000 | -4.520940000 | 2.388505000  |
| C | -0.645241000 | -3.954916000 | 4.484772000  |
| H | -0.546234000 | -5.010087000 | 4.753066000  |
| H | -0.064883000 | -3.364280000 | 5.201725000  |
| C | -2.095515000 | -3.469678000 | 4.446780000  |
| H | -2.501482000 | -3.240391000 | 5.435629000  |

|                 |              |              |              |
|-----------------|--------------|--------------|--------------|
| H               | -2.742279000 | -4.217746000 | 3.975415000  |
| C               | -1.987102000 | -2.232945000 | 3.569314000  |
| H               | -2.900135000 | -1.994869000 | 3.019910000  |
| H               | -1.657116000 | -1.355657000 | 4.137991000  |
| N               | 0.853994000  | 1.837918000  | -2.415104000 |
| N               | -2.086680000 | -0.323901000 | 0.006831000  |
| N               | 3.350984000  | 4.604286000  | -1.943613000 |
| O               | -0.955967000 | -2.548193000 | 2.599540000  |
| Si              | 2.010978000  | -2.749897000 | -1.671837000 |
| Y               | 0.079065000  | -0.872968000 | 1.097171000  |
| C               | 1.607713000  | -0.036177000 | 3.429678000  |
| C               | 3.346416000  | -1.402087000 | 2.631053000  |
| C               | 2.451668000  | 0.419496000  | 4.484970000  |
| C               | 4.214951000  | -1.011373000 | 3.639105000  |
| H               | 2.084222000  | 1.142230000  | 5.204805000  |
| H               | 5.221548000  | -1.410019000 | 3.691502000  |
| C               | 3.737088000  | -0.077901000 | 4.573564000  |
| H               | 4.386238000  | 0.261184000  | 5.378224000  |
| N               | 2.096939000  | -0.943366000 | 2.522097000  |
| N               | 0.340099000  | 0.314543000  | 3.169205000  |
| H               | 3.654156000  | -2.112572000 | 1.866293000  |
| C               | -0.256382000 | 1.331606000  | 3.999604000  |
| H               | 0.308204000  | 2.279278000  | 3.988764000  |
| H               | -1.265585000 | 1.554429000  | 3.643424000  |
| H               | -0.345619000 | 1.027346000  | 5.056998000  |
| C               | 0.538931000  | 1.332291000  | -0.011517000 |
| H               | 1.458478000  | 1.858343000  | 0.235640000  |
| H               | -0.270991000 | 1.607073000  | 0.676660000  |
| <b><u>G</u></b> |              |              |              |
| C               | -0.093123000 | 1.327695000  | -1.342673000 |
| C               | -1.463298000 | 0.953220000  | -1.547397000 |
| C               | -1.776207000 | 1.225052000  | -2.937320000 |
| C               | -2.921936000 | 1.099245000  | -3.726252000 |
| H               | -3.858112000 | 0.751007000  | -3.297536000 |
| C               | -2.857894000 | 1.435450000  | -5.078699000 |
| H               | -3.749305000 | 1.348652000  | -5.693761000 |
| C               | -1.664013000 | 1.882514000  | -5.653493000 |
| H               | -1.635561000 | 2.139895000  | -6.708348000 |
| C               | -0.502658000 | 2.005118000  | -4.887187000 |
| H               | 0.422900000  | 2.352227000  | -5.336832000 |
| C               | -0.579614000 | 1.673891000  | -3.539381000 |
| C               | -2.317440000 | 0.346838000  | -0.618227000 |
| H               | -3.375389000 | 0.308873000  | -0.902097000 |

|   |              |              |              |
|---|--------------|--------------|--------------|
| C | -3.057803000 | -0.706555000 | 1.336846000  |
| C | -3.785481000 | -1.858043000 | 0.948941000  |
| C | -4.798804000 | -2.325366000 | 1.795503000  |
| H | -5.366502000 | -3.205774000 | 1.504418000  |
| C | -5.094064000 | -1.690775000 | 2.994421000  |
| H | -5.884252000 | -2.071198000 | 3.636181000  |
| C | -4.377363000 | -0.556149000 | 3.362872000  |
| H | -4.622643000 | -0.054857000 | 4.294050000  |
| C | -3.361970000 | -0.042587000 | 2.552763000  |
| C | -3.519076000 | -2.607605000 | -0.348950000 |
| H | -2.634204000 | -2.164751000 | -0.814276000 |
| C | -4.690151000 | -2.461030000 | -1.332344000 |
| H | -5.605238000 | -2.906140000 | -0.926040000 |
| H | -4.466010000 | -2.964965000 | -2.279020000 |
| H | -4.907151000 | -1.410849000 | -1.550911000 |
| C | -3.204239000 | -4.089906000 | -0.106769000 |
| H | -2.365129000 | -4.199651000 | 0.584793000  |
| H | -2.936399000 | -4.582030000 | -1.048113000 |
| H | -4.063156000 | -4.626124000 | 0.311530000  |
| C | -2.654654000 | 1.250098000  | 2.931267000  |
| H | -1.628218000 | 1.185936000  | 2.551906000  |
| C | -3.324416000 | 2.448553000  | 2.238603000  |
| H | -3.325614000 | 2.336052000  | 1.150816000  |
| H | -2.797365000 | 3.378023000  | 2.480739000  |
| H | -4.364336000 | 2.551860000  | 2.568871000  |
| C | -2.567443000 | 1.491374000  | 4.440871000  |
| H | -3.547052000 | 1.711813000  | 4.879728000  |
| H | -1.927344000 | 2.355899000  | 4.642174000  |
| H | -2.144813000 | 0.630322000  | 4.968297000  |
| C | 1.751751000  | 2.227512000  | -2.782792000 |
| H | 2.062988000  | 1.968381000  | -3.798802000 |
| H | 2.434991000  | 1.710311000  | -2.105232000 |
| C | 1.818000000  | 3.749918000  | -2.604983000 |
| H | 1.091853000  | 4.196109000  | -3.293853000 |
| H | 1.485245000  | 4.013231000  | -1.582829000 |
| C | 3.084654000  | 5.692184000  | -3.286668000 |
| H | 2.750926000  | 6.319331000  | -2.433465000 |
| H | 2.340117000  | 5.814614000  | -4.081947000 |
| C | 4.447472000  | 6.182604000  | -3.769240000 |
| H | 4.710242000  | 5.638425000  | -4.685217000 |
| H | 4.381873000  | 7.245980000  | -4.028145000 |
| C | 5.519412000  | 5.945529000  | -2.705445000 |
| H | 5.316964000  | 6.587913000  | -1.836508000 |
| H | 6.509590000  | 6.227762000  | -3.081664000 |



|    |              |              |              |
|----|--------------|--------------|--------------|
| C  | 5.503495000  | 4.481935000  | -2.265075000 |
| H  | 6.198060000  | 4.315892000  | -1.433372000 |
| H  | 5.828704000  | 3.842256000  | -3.095264000 |
| C  | 4.098294000  | 4.058480000  | -1.843504000 |
| H  | 4.101078000  | 2.996658000  | -1.576447000 |
| H  | 3.803962000  | 4.617196000  | -0.930089000 |
| C  | 1.087368000  | -0.223971000 | 3.204866000  |
| H  | 1.595610000  | -1.139987000 | 3.564745000  |
| H  | 0.185071000  | -0.126795000 | 3.837263000  |
| C  | 1.373490000  | 2.889944000  | 3.322488000  |
| H  | 1.184406000  | 3.039819000  | 2.254853000  |
| H  | 2.008800000  | 3.712974000  | 3.668798000  |
| H  | 0.415264000  | 2.969723000  | 3.847826000  |
| C  | 3.840640000  | 1.159097000  | 2.690246000  |
| H  | 4.419847000  | 0.262501000  | 2.938046000  |
| H  | 4.464927000  | 2.029024000  | 2.924089000  |
| H  | 3.658891000  | 1.151982000  | 1.610037000  |
| C  | 2.674751000  | 1.208113000  | 5.518357000  |
| H  | 1.780614000  | 1.275754000  | 6.148569000  |
| H  | 3.329264000  | 2.049508000  | 5.774622000  |
| H  | 3.198092000  | 0.283378000  | 5.787518000  |
| C  | 0.351786000  | -4.236369000 | 1.881380000  |
| H  | 1.321745000  | -3.975435000 | 1.453394000  |
| H  | -0.202781000 | -4.858702000 | 1.168172000  |
| C  | 0.410391000  | -4.879255000 | 3.257307000  |
| H  | 0.556369000  | -5.961480000 | 3.203149000  |
| H  | 1.228906000  | -4.449789000 | 3.845332000  |
| C  | -0.943667000 | -4.478658000 | 3.846362000  |
| H  | -0.972016000 | -4.522901000 | 4.938277000  |
| H  | -1.735089000 | -5.130051000 | 3.459551000  |
| C  | -1.119287000 | -3.054818000 | 3.329649000  |
| H  | -2.157572000 | -2.785285000 | 3.123893000  |
| H  | -0.677062000 | -2.315729000 | 4.005403000  |
| N  | 0.417152000  | 1.708889000  | -2.559703000 |
| N  | -1.983454000 | -0.203154000 | 0.541389000  |
| N  | 3.135106000  | 4.279116000  | -2.920070000 |
| O  | -0.379280000 | -2.998415000 | 2.077747000  |
| Si | 2.202788000  | 1.208199000  | 3.665667000  |
| Y  | 0.377185000  | -0.887724000 | 0.983769000  |
| C  | 1.899545000  | -2.439086000 | -0.947757000 |
| C  | 0.025764000  | -2.571888000 | -2.347446000 |
| C  | 2.693811000  | -3.068191000 | -1.945935000 |
| C  | 0.738336000  | -3.190872000 | -3.364595000 |
| H  | 3.748788000  | -3.245471000 | -1.770417000 |

|   |              |              |              |
|---|--------------|--------------|--------------|
| H | 0.254169000  | -3.460135000 | -4.296244000 |
| C | 2.099766000  | -3.438329000 | -3.138020000 |
| H | 2.698884000  | -3.919984000 | -3.907798000 |
| N | 0.564802000  | -2.219291000 | -1.177730000 |
| N | 2.296780000  | -1.998482000 | 0.262311000  |
| H | -1.029332000 | -2.338300000 | -2.472275000 |
| C | 3.683600000  | -2.162997000 | 0.627074000  |
| H | 4.370251000  | -1.629211000 | -0.050032000 |
| H | 3.843767000  | -1.765150000 | 1.631672000  |
| H | 3.997731000  | -3.220591000 | 0.634285000  |
| C | 0.628705000  | 1.332265000  | -0.124679000 |
| H | 0.004665000  | 1.646996000  | 0.721309000  |
| H | 1.595569000  | 1.829277000  | -0.115792000 |

**TS(G-H)**

|   |              |              |              |
|---|--------------|--------------|--------------|
| C | -0.905645000 | 1.095140000  | -2.412065000 |
| C | -2.360830000 | 0.985212000  | -2.392933000 |
| C | -2.878222000 | 1.877125000  | -3.420239000 |
| C | -4.158677000 | 2.211758000  | -3.858707000 |
| H | -5.038377000 | 1.776209000  | -3.390993000 |
| C | -4.308690000 | 3.116166000  | -4.913204000 |
| H | -5.305511000 | 3.381516000  | -5.254450000 |
| C | -3.191538000 | 3.680152000  | -5.532654000 |
| H | -3.324333000 | 4.382173000  | -6.351251000 |
| C | -1.897788000 | 3.355823000  | -5.112743000 |
| H | -1.032771000 | 3.801130000  | -5.595392000 |
| C | -1.761535000 | 2.456052000  | -4.059987000 |
| C | -3.148756000 | 0.165712000  | -1.610773000 |
| H | -4.228680000 | 0.301883000  | -1.724955000 |
| C | -3.812591000 | -1.337270000 | 0.054354000  |
| C | -4.305579000 | -2.639453000 | -0.212820000 |
| C | -5.300362000 | -3.171988000 | 0.613704000  |
| H | -5.690435000 | -4.164824000 | 0.403935000  |
| C | -5.820714000 | -2.446437000 | 1.679470000  |
| H | -6.600235000 | -2.873239000 | 2.305001000  |
| C | -5.347204000 | -1.162814000 | 1.926254000  |
| H | -5.765013000 | -0.590310000 | 2.750521000  |
| C | -4.346044000 | -0.587339000 | 1.135836000  |
| C | -3.840091000 | -3.428715000 | -1.425533000 |
| H | -2.936670000 | -2.936719000 | -1.801824000 |
| C | -4.889431000 | -3.357520000 | -2.545932000 |
| H | -5.833842000 | -3.812779000 | -2.226771000 |
| H | -4.544015000 | -3.891655000 | -3.438618000 |
| H | -5.096685000 | -2.321259000 | -2.829062000 |

|   |              |              |              |
|---|--------------|--------------|--------------|
| C | -3.480716000 | -4.883884000 | -1.104376000 |
| H | -2.739067000 | -4.942796000 | -0.301956000 |
| H | -3.059774000 | -5.374993000 | -1.988068000 |
| H | -4.357715000 | -5.464398000 | -0.797351000 |
| C | -3.872520000 | 0.824098000  | 1.454730000  |
| H | -2.983897000 | 1.020510000  | 0.847617000  |
| C | -4.936172000 | 1.864946000  | 1.072153000  |
| H | -5.191456000 | 1.805941000  | 0.010400000  |
| H | -4.573778000 | 2.878714000  | 1.274480000  |
| H | -5.858186000 | 1.716012000  | 1.646072000  |
| C | -3.471463000 | 0.989833000  | 2.927246000  |
| H | -4.326162000 | 0.871833000  | 3.602358000  |
| H | -3.061081000 | 1.990939000  | 3.096691000  |
| H | -2.710563000 | 0.260592000  | 3.223414000  |
| C | 0.723643000  | 2.323530000  | -3.906033000 |
| H | 0.706772000  | 2.460467000  | -4.992738000 |
| H | 1.385064000  | 1.476381000  | -3.703694000 |
| C | 1.239108000  | 3.613862000  | -3.255506000 |
| H | 0.476761000  | 4.386513000  | -3.407018000 |
| H | 1.324153000  | 3.466231000  | -2.161870000 |
| C | 2.710128000  | 5.498085000  | -3.593047000 |
| H | 2.850922000  | 5.691419000  | -2.508500000 |
| H | 1.816084000  | 6.052860000  | -3.900656000 |
| C | 3.929079000  | 6.009178000  | -4.357005000 |
| H | 3.728162000  | 5.925766000  | -5.432583000 |
| H | 4.080792000  | 7.072043000  | -4.134317000 |
| C | 5.173129000  | 5.194548000  | -4.002850000 |
| H | 5.439828000  | 5.377650000  | -2.952051000 |
| H | 6.031723000  | 5.512591000  | -4.605850000 |
| C | 4.893118000  | 3.704907000  | -4.199671000 |
| H | 5.741526000  | 3.098859000  | -3.860430000 |
| H | 4.746832000  | 3.494571000  | -5.266691000 |
| C | 3.634583000  | 3.285124000  | -3.443069000 |
| H | 3.427683000  | 2.227539000  | -3.636153000 |
| H | 3.813091000  | 3.382479000  | -2.351080000 |
| C | 0.357698000  | 0.103895000  | 1.241926000  |
| H | 1.054708000  | -0.701266000 | 1.536866000  |
| H | -0.556574000 | -0.007292000 | 1.849585000  |
| C | 0.082835000  | 3.190485000  | 1.281626000  |
| H | -0.125961000 | 3.175188000  | 0.207434000  |
| H | 0.560936000  | 4.145008000  | 1.526652000  |
| H | -0.876909000 | 3.153492000  | 1.808089000  |
| C | 2.870902000  | 1.873917000  | 0.914428000  |
| H | 3.522592000  | 1.034848000  | 1.182362000  |

|    |              |              |              |
|----|--------------|--------------|--------------|
| H  | 3.378907000  | 2.798318000  | 1.209670000  |
| H  | 2.762751000  | 1.880576000  | -0.174537000 |
| C  | 1.460883000  | 1.762760000  | 3.648263000  |
| H  | 0.513318000  | 1.665759000  | 4.189509000  |
| H  | 1.928760000  | 2.703221000  | 3.960951000  |
| H  | 2.113786000  | 0.942957000  | 3.968027000  |
| C  | -0.000886000 | -4.086512000 | 1.801487000  |
| H  | 0.773213000  | -3.626568000 | 2.430608000  |
| H  | 0.463148000  | -4.449133000 | 0.884679000  |
| C  | -0.813604000 | -5.126854000 | 2.581246000  |
| H  | -1.082352000 | -5.972511000 | 1.942898000  |
| H  | -0.237261000 | -5.519747000 | 3.423116000  |
| C  | -2.076206000 | -4.357206000 | 3.037073000  |
| H  | -2.232316000 | -4.401596000 | 4.118047000  |
| H  | -2.970337000 | -4.756346000 | 2.552485000  |
| C  | -1.824186000 | -2.925147000 | 2.567102000  |
| H  | -2.719663000 | -2.397480000 | 2.238413000  |
| H  | -1.306215000 | -2.331466000 | 3.333416000  |
| N  | -0.603368000 | 1.969109000  | -3.461914000 |
| N  | -2.763563000 | -0.794986000 | -0.744721000 |
| N  | 2.480794000  | 4.080076000  | -3.854570000 |
| O  | -0.950877000 | -3.065466000 | 1.429002000  |
| Si | 1.179993000  | 1.721161000  | 1.765254000  |
| Y  | -0.516253000 | -1.532462000 | -0.519878000 |
| C  | 1.195104000  | -3.350904000 | -1.938188000 |
| C  | -0.579449000 | -3.710396000 | -3.438751000 |
| C  | 2.055308000  | -4.115363000 | -2.778020000 |
| C  | 0.202829000  | -4.465921000 | -4.296022000 |
| H  | 3.094716000  | -4.255930000 | -2.504350000 |
| H  | -0.213427000 | -4.879058000 | -5.207421000 |
| C  | 1.546546000  | -4.663271000 | -3.938241000 |
| H  | 2.197426000  | -5.249568000 | -4.583159000 |
| N  | -0.123244000 | -3.181680000 | -2.297654000 |
| N  | 1.505717000  | -2.726830000 | -0.790079000 |
| H  | -1.624433000 | -3.511821000 | -3.667560000 |
| C  | 2.872768000  | -2.784614000 | -0.333229000 |
| H  | 3.585451000  | -2.367904000 | -1.063366000 |
| H  | 2.975160000  | -2.200818000 | 0.586167000  |
| H  | 3.206990000  | -3.811889000 | -0.108608000 |
| C  | 0.032145000  | 0.495545000  | -1.583364000 |
| H  | 0.090497000  | 0.459494000  | -0.166896000 |
| H  | 1.067055000  | 0.788574000  | -1.787842000 |

**H**

|   |              |              |              |
|---|--------------|--------------|--------------|
| C | -0.491243000 | 0.978774000  | -2.410427000 |
| C | -1.882820000 | 0.484241000  | -2.557646000 |
| C | -2.409210000 | 1.070150000  | -3.786907000 |
| C | -3.615513000 | 0.930961000  | -4.469850000 |
| H | -4.373742000 | 0.234463000  | -4.119528000 |
| C | -3.844183000 | 1.687603000  | -5.622841000 |
| H | -4.782940000 | 1.581948000  | -6.159133000 |
| C | -2.870660000 | 2.571541000  | -6.092339000 |
| H | -3.058459000 | 3.151983000  | -6.991667000 |
| C | -1.650795000 | 2.722196000  | -5.426943000 |
| H | -0.902587000 | 3.416560000  | -5.797418000 |
| C | -1.430874000 | 1.960760000  | -4.280657000 |
| C | -2.698759000 | -0.192014000 | -1.659131000 |
| H | -3.762519000 | -0.223950000 | -1.918679000 |
| C | -3.326449000 | -1.113686000 | 0.434517000  |
| C | -3.808761000 | -2.433044000 | 0.614450000  |
| C | -4.767486000 | -2.671006000 | 1.604582000  |
| H | -5.153779000 | -3.678370000 | 1.738985000  |
| C | -5.251954000 | -1.644077000 | 2.406115000  |
| H | -6.000766000 | -1.849511000 | 3.166468000  |
| C | -4.778080000 | -0.350247000 | 2.219235000  |
| H | -5.164792000 | 0.453259000  | 2.840840000  |
| C | -3.816903000 | -0.058803000 | 1.246577000  |
| C | -3.378258000 | -3.576792000 | -0.290468000 |
| H | -2.500286000 | -3.241326000 | -0.855585000 |
| C | -4.470902000 | -3.894049000 | -1.322864000 |
| H | -5.389581000 | -4.228012000 | -0.827323000 |
| H | -4.144971000 | -4.687101000 | -2.005105000 |
| H | -4.717804000 | -3.010988000 | -1.919749000 |
| C | -2.973283000 | -4.841053000 | 0.476752000  |
| H | -2.205198000 | -4.626992000 | 1.227044000  |
| H | -2.575147000 | -5.593240000 | -0.212678000 |
| H | -3.824848000 | -5.293524000 | 0.996266000  |
| C | -3.334297000 | 1.374014000  | 1.066012000  |
| H | -2.432526000 | 1.339036000  | 0.445610000  |
| C | -4.380495000 | 2.219951000  | 0.323235000  |
| H | -4.611744000 | 1.799641000  | -0.659495000 |
| H | -4.014715000 | 3.241775000  | 0.173134000  |
| H | -5.315871000 | 2.276204000  | 0.892508000  |
| C | -2.955222000 | 2.048121000  | 2.391565000  |
| H | -3.823831000 | 2.196744000  | 3.042362000  |
| H | -2.522244000 | 3.035833000  | 2.199633000  |
| H | -2.219410000 | 1.460510000  | 2.949733000  |
| C | 0.922675000  | 2.591816000  | -3.726905000 |

|   |              |              |              |
|---|--------------|--------------|--------------|
| H | 1.018973000  | 2.753663000  | -4.805468000 |
| H | 1.740864000  | 1.927431000  | -3.428310000 |
| C | 1.014800000  | 3.943844000  | -3.007466000 |
| H | 0.157875000  | 4.548358000  | -3.326076000 |
| H | 0.899629000  | 3.785232000  | -1.918019000 |
| C | 2.095729000  | 6.104074000  | -3.123708000 |
| H | 1.942078000  | 6.339236000  | -2.048925000 |
| H | 1.200242000  | 6.447491000  | -3.654655000 |
| C | 3.323018000  | 6.857137000  | -3.631302000 |
| H | 3.393904000  | 6.718119000  | -4.717489000 |
| H | 3.195749000  | 7.930539000  | -3.446928000 |
| C | 4.595290000  | 6.336720000  | -2.962383000 |
| H | 4.572126000  | 6.590766000  | -1.892817000 |
| H | 5.483220000  | 6.823659000  | -3.382406000 |
| C | 4.683646000  | 4.818738000  | -3.117690000 |
| H | 5.538517000  | 4.417778000  | -2.560259000 |
| H | 4.833874000  | 4.563461000  | -4.174246000 |
| C | 3.400326000  | 4.148207000  | -2.632285000 |
| H | 3.465948000  | 3.067666000  | -2.795393000 |
| H | 3.297504000  | 4.299980000  | -1.536111000 |
| C | 0.598974000  | -2.912193000 | 2.009541000  |
| H | 1.672122000  | -2.988155000 | 2.229830000  |
| H | 0.294062000  | -3.786695000 | 1.432579000  |
| C | -0.220826000 | -2.660624000 | 3.280855000  |
| H | -1.180642000 | -3.180667000 | 3.236968000  |
| H | 0.312123000  | -3.018863000 | 4.165624000  |
| C | -0.436910000 | -1.127366000 | 3.297363000  |
| H | -0.084092000 | -0.663240000 | 4.222062000  |
| H | -1.497679000 | -0.893330000 | 3.183731000  |
| C | 0.349894000  | -0.625390000 | 2.086710000  |
| H | -0.104224000 | 0.204404000  | 1.543023000  |
| H | 1.384377000  | -0.362752000 | 2.346308000  |
| N | -0.318169000 | 1.909290000  | -3.458640000 |
| N | -2.323698000 | -0.836318000 | -0.527653000 |
| N | 2.233405000  | 4.667136000  | -3.339888000 |
| O | 0.385999000  | -1.753096000 | 1.186135000  |
| Y | -0.239344000 | -1.516129000 | -1.126523000 |
| C | 0.574799000  | -3.737894000 | -2.722233000 |
| C | -0.972718000 | -2.968020000 | -4.326647000 |
| C | 0.950263000  | -4.795881000 | -3.598813000 |
| C | -0.650340000 | -3.974224000 | -5.222075000 |
| H | 1.709806000  | -5.507970000 | -3.297262000 |
| H | -1.138954000 | -4.034192000 | -6.187544000 |
| C | 0.332953000  | -4.897292000 | -4.829859000 |

|   |              |              |              |
|---|--------------|--------------|--------------|
| H | 0.615812000  | -5.703407000 | -5.503359000 |
| N | -0.396013000 | -2.849515000 | -3.125551000 |
| N | 1.063886000  | -3.464803000 | -1.498500000 |
| H | -1.715951000 | -2.211067000 | -4.567657000 |
| C | 2.139565000  | -4.293230000 | -1.011154000 |
| H | 3.010416000  | -4.299219000 | -1.686910000 |
| H | 2.487878000  | -3.912999000 | -0.046579000 |
| H | 1.841532000  | -5.345027000 | -0.861683000 |
| C | 0.453463000  | 0.604852000  | -1.477767000 |
| H | 1.375419000  | 1.191269000  | -1.478270000 |

## **I**

|   |              |             |              |
|---|--------------|-------------|--------------|
| Y | 9.590889000  | 6.123440000 | 12.039059000 |
| O | 9.084487000  | 8.579723000 | 12.086067000 |
| N | 7.260374000  | 5.483965000 | 11.919244000 |
| N | 9.785494000  | 6.062031000 | 9.522981000  |
| N | 7.510237000  | 6.769837000 | 16.213646000 |
| N | 11.414004000 | 6.964891000 | 10.822455000 |
| C | 6.415993000  | 5.594577000 | 12.954029000 |
| H | 5.365131000  | 5.389393000 | 12.723563000 |
| C | 5.557716000  | 6.134704000 | 15.229705000 |
| C | 6.640189000  | 5.953867000 | 14.275646000 |
| C | 6.136274000  | 6.646798000 | 16.409714000 |
| C | 11.050301000 | 6.602931000 | 9.583134000  |
| C | 9.188436000  | 6.209340000 | 14.445229000 |
| H | 9.922590000  | 6.690489000 | 15.119668000 |
| C | 7.885343000  | 6.310804000 | 14.943290000 |
| C | 8.400929000  | 7.207223000 | 17.263618000 |
| H | 9.409262000  | 6.848460000 | 17.049498000 |
| H | 8.089026000  | 6.721475000 | 18.194055000 |
| C | 4.179005000  | 5.920858000 | 15.191444000 |
| H | 3.700899000  | 5.524907000 | 14.298681000 |
| C | 6.620398000  | 5.091926000 | 10.697048000 |
| C | 5.377795000  | 6.942056000 | 17.538230000 |
| H | 5.833412000  | 7.337712000 | 18.441013000 |
| C | 3.998859000  | 6.715753000 | 17.479306000 |
| H | 3.385300000  | 6.936523000 | 18.348368000 |
| C | 6.473930000  | 3.718206000 | 10.384334000 |
| C | 9.295236000  | 5.640937000 | 8.351148000  |
| H | 8.294635000  | 5.217281000 | 8.384532000  |
| N | 9.330752000  | 9.207380000 | 18.433456000 |
| C | 3.406682000  | 6.213132000 | 16.318736000 |
| H | 2.333448000  | 6.045553000 | 16.290555000 |
| C | 6.122612000  | 6.075134000 | 9.807433000  |

|   |              |              |              |
|---|--------------|--------------|--------------|
| C | 6.867209000  | 2.627423000  | 11.368738000 |
| H | 7.572343000  | 3.069035000  | 12.081574000 |
| C | 8.415678000  | 8.734019000  | 17.403813000 |
| H | 8.746787000  | 9.150100000  | 16.445090000 |
| H | 7.382981000  | 9.100220000  | 17.566181000 |
| C | 11.821425000 | 6.719306000  | 8.388336000  |
| H | 12.822668000 | 7.132246000  | 8.427974000  |
| C | 5.516240000  | 5.665784000  | 8.615112000  |
| H | 5.124736000  | 6.416093000  | 7.933658000  |
| C | 5.872962000  | 3.360341000  | 9.172656000  |
| H | 5.760127000  | 2.308081000  | 8.927154000  |
| C | 6.177035000  | 7.557529000  | 10.140425000 |
| H | 6.902934000  | 7.678941000  | 10.949931000 |
| C | 5.399550000  | 4.320626000  | 8.286789000  |
| H | 4.929517000  | 4.022115000  | 7.353444000  |
| C | 12.740415000 | 7.500841000  | 11.011708000 |
| H | 12.905410000 | 8.437183000  | 10.449883000 |
| H | 13.530755000 | 6.796317000  | 10.712845000 |
| H | 12.896464000 | 7.723897000  | 12.070348000 |
| C | 9.991083000  | 5.729980000  | 7.153988000  |
| H | 9.545745000  | 5.381382000  | 6.229085000  |
| C | 5.633083000  | 2.159042000  | 12.158113000 |
| H | 5.183158000  | 2.974603000  | 12.730990000 |
| H | 5.899879000  | 1.359616000  | 12.859175000 |
| H | 4.868385000  | 1.765740000  | 11.478456000 |
| C | 8.197302000  | 9.247087000  | 13.016396000 |
| H | 8.304982000  | 8.748204000  | 13.979661000 |
| H | 7.164179000  | 9.124756000  | 12.668771000 |
| C | 9.708970000  | 9.556845000  | 11.212294000 |
| H | 9.583476000  | 9.225050000  | 10.179646000 |
| H | 10.777613000 | 9.578624000  | 11.443737000 |
| C | 6.647531000  | 8.422879000  | 8.964687000  |
| H | 7.609531000  | 8.078158000  | 8.575055000  |
| H | 6.758023000  | 9.465539000  | 9.284201000  |
| H | 5.928760000  | 8.420703000  | 8.137863000  |
| C | 9.026334000  | 10.883735000 | 11.525416000 |
| H | 9.689965000  | 11.735992000 | 11.355280000 |
| H | 8.135715000  | 11.018117000 | 10.901728000 |
| C | 7.549405000  | 1.422786000  | 10.709778000 |
| H | 6.843221000  | 0.836287000  | 10.110730000 |
| H | 7.940519000  | 0.750833000  | 11.482231000 |
| H | 8.375556000  | 1.711390000  | 10.053257000 |
| C | 11.280083000 | 6.286478000  | 7.194599000  |
| H | 11.863435000 | 6.373859000  | 6.280205000  |



|   |              |              |              |
|---|--------------|--------------|--------------|
| C | 4.815120000  | 8.047221000  | 10.658309000 |
| H | 4.039287000  | 7.919973000  | 9.894523000  |
| H | 4.856020000  | 9.111660000  | 10.918665000 |
| H | 4.500420000  | 7.494222000  | 11.548168000 |
| C | 10.621113000 | 11.135316000 | 19.285371000 |
| H | 11.577682000 | 10.650055000 | 19.054954000 |
| H | 10.763667000 | 12.214863000 | 19.156475000 |
| C | 8.867602000  | 8.892426000  | 19.784079000 |
| H | 8.699118000  | 7.814522000  | 19.861333000 |
| H | 7.896528000  | 9.390486000  | 19.992999000 |
| C | 10.210880000 | 10.805748000 | 20.719903000 |
| H | 9.319804000  | 11.391715000 | 20.987155000 |
| H | 10.999246000 | 11.091198000 | 21.426155000 |
| C | 8.623798000  | 10.705833000 | 12.990696000 |
| H | 7.821918000  | 11.378535000 | 13.306564000 |
| H | 9.485341000  | 10.866252000 | 13.648806000 |
| C | 9.571248000  | 10.641779000 | 18.293724000 |
| H | 8.633531000  | 11.219753000 | 18.437593000 |
| H | 9.907801000  | 10.832904000 | 17.268034000 |
| C | 9.890191000  | 9.316569000  | 20.835925000 |
| H | 9.503798000  | 9.075734000  | 21.833320000 |
| H | 10.805516000 | 8.729164000  | 20.690346000 |
| Y | 10.248671000 | 4.001035000  | 14.864964000 |
| O | 10.755105000 | 1.544757000  | 14.817952000 |
| N | 12.579193000 | 4.640492000  | 14.984783000 |
| N | 10.054069000 | 4.062435000  | 17.381047000 |
| N | 12.329306000 | 3.354651000  | 10.690366000 |
| N | 8.425567000  | 3.159566000  | 16.081574000 |
| C | 13.423568000 | 4.529865000  | 13.949996000 |
| H | 14.474433000 | 4.735038000  | 14.180459000 |
| C | 14.281842000 | 3.989697000  | 11.674330000 |
| C | 13.199368000 | 4.170569000  | 12.628381000 |
| C | 13.703275000 | 3.477637000  | 10.494311000 |
| C | 8.789266000  | 3.521527000  | 17.320896000 |
| C | 10.651119000 | 3.915138000  | 12.458793000 |
| H | 9.916965000  | 3.433988000  | 11.784352000 |
| C | 11.954209000 | 3.813663000  | 11.960732000 |
| C | 11.438599000 | 2.917348000  | 9.640370000  |
| H | 10.430285000 | 3.276163000  | 9.854496000  |
| H | 11.750535000 | 3.403106000  | 8.709949000  |
| C | 15.660561000 | 4.203494000  | 11.712604000 |
| H | 16.138675000 | 4.599415000  | 12.605376000 |
| C | 13.219172000 | 5.032531000  | 16.206975000 |
| C | 14.461750000 | 3.182383000  | 9.365791000  |

|   |              |             |              |
|---|--------------|-------------|--------------|
| H | 14.006126000 | 2.786769000 | 8.462993000  |
| C | 15.840693000 | 3.408636000 | 9.424729000  |
| H | 16.454250000 | 3.187866000 | 8.555664000  |
| C | 13.365656000 | 6.406251000 | 16.519677000 |
| C | 10.544331000 | 4.483527000 | 18.552879000 |
| H | 11.544932000 | 4.907185000 | 18.519492000 |
| N | 10.508680000 | 0.917288000 | 8.470445000  |
| C | 16.432881000 | 3.911212000 | 10.585313000 |
| H | 17.506121000 | 4.078752000 | 10.613504000 |
| C | 13.716937000 | 4.049321000 | 17.096600000 |
| C | 12.972371000 | 7.497026000 | 15.535265000 |
| H | 12.267211000 | 7.055413000 | 14.822455000 |
| C | 11.423744000 | 1.390558000 | 9.500138000  |
| H | 11.092557000 | 0.974484000 | 10.458837000 |
| H | 12.456419000 | 1.024275000 | 9.337815000  |
| C | 8.018146000  | 3.405148000 | 18.515695000 |
| H | 7.016903000  | 2.992206000 | 18.476058000 |
| C | 14.323309000 | 4.458674000 | 18.288920000 |
| H | 14.714798000 | 3.708368000 | 18.970386000 |
| C | 13.966622000 | 6.764119000 | 17.731355000 |
| H | 14.079464000 | 7.816379000 | 17.976851000 |
| C | 13.662490000 | 2.566925000 | 16.763615000 |
| H | 12.936605000 | 2.445523000 | 15.954095000 |
| C | 14.440016000 | 5.803835000 | 18.617231000 |
| H | 14.910045000 | 6.102346000 | 19.550579000 |
| C | 7.099166000  | 2.623591000 | 15.892323000 |
| H | 6.934182000  | 1.687257000 | 16.454165000 |
| H | 6.308811000  | 3.328105000 | 16.191169000 |
| H | 6.943128000  | 2.400512000 | 14.833687000 |
| C | 9.848489000  | 4.394477000 | 19.750041000 |
| H | 10.293828000 | 4.743072000 | 20.674944000 |
| C | 14.206479000 | 7.965382000 | 14.745847000 |
| H | 14.656386000 | 7.149807000 | 14.172974000 |
| H | 13.939666000 | 8.764793000 | 14.044775000 |
| H | 14.971198000 | 8.358695000 | 15.425475000 |
| C | 11.642294000 | 0.877397000 | 13.887623000 |
| H | 11.534619000 | 1.376285000 | 12.924359000 |
| H | 12.675414000 | 0.999727000 | 14.235256000 |
| C | 10.130602000 | 0.567626000 | 15.691704000 |
| H | 10.256072000 | 0.899417000 | 16.724357000 |
| H | 9.061965000  | 0.545845000 | 15.460236000 |
| C | 13.191956000 | 1.701584000 | 17.939344000 |
| H | 12.229968000 | 2.046338000 | 18.328979000 |
| H | 13.081423000 | 0.658930000 | 17.619822000 |

|   |              |              |              |
|---|--------------|--------------|--------------|
| H | 13.910727000 | 1.703723000  | 18.766168000 |
| C | 10.813248000 | -0.759259000 | 15.378587000 |
| H | 10.149619000 | -1.611520000 | 15.548715000 |
| H | 11.703861000 | -0.893637000 | 16.002284000 |
| C | 12.290210000 | 8.701683000  | 16.194221000 |
| H | 12.996424000 | 9.288196000  | 16.793219000 |
| H | 11.899065000 | 9.373615000  | 15.421765000 |
| H | 11.464088000 | 8.413098000  | 16.850788000 |
| C | 8.559490000  | 3.837975000  | 19.709431000 |
| H | 7.976140000  | 3.750592000  | 20.623826000 |
| C | 15.024403000 | 2.077197000  | 16.245756000 |
| H | 15.800228000 | 2.204443000  | 17.009551000 |
| H | 14.983485000 | 1.012754000  | 15.985418000 |
| H | 15.339128000 | 2.630174000  | 15.355893000 |
| C | 9.218200000  | -1.010532000 | 7.618449000  |
| H | 8.261662000  | -0.525195000 | 7.848834000  |
| H | 9.075552000  | -2.090070000 | 7.747324000  |
| C | 10.971910000 | 1.232228000  | 7.119848000  |
| H | 11.140478000 | 2.310121000  | 7.042616000  |
| H | 11.942955000 | 0.734097000  | 6.910960000  |
| C | 9.628518000  | -0.680976000 | 6.183939000  |
| H | 10.519557000 | -1.267011000 | 5.916714000  |
| H | 8.840158000  | -0.966350000 | 5.477649000  |
| C | 11.215796000 | -0.581350000 | 13.913312000 |
| H | 12.017678000 | -1.254051000 | 13.597446000 |
| H | 10.354258000 | -0.741765000 | 13.255195000 |
| C | 10.268067000 | -0.517094000 | 8.610142000  |
| H | 11.205745000 | -1.095138000 | 8.466298000  |
| H | 9.931466000  | -0.708213000 | 9.635818000  |
| C | 9.949333000  | 0.808179000  | 6.067953000  |
| H | 10.335788000 | 1.048997000  | 5.070577000  |
| H | 9.034049000  | 1.395657000  | 6.213500000  |

**TS(D-E)'**

|   |              |             |              |
|---|--------------|-------------|--------------|
| C | 0.098825000  | 0.592345000 | -1.458984000 |
| C | -1.179105000 | 0.467183000 | -2.191726000 |
| C | -0.991620000 | 1.005165000 | -3.529299000 |
| C | -1.795862000 | 1.118960000 | -4.662790000 |
| H | -2.814181000 | 0.737852000 | -4.657827000 |
| C | -1.286775000 | 1.740229000 | -5.809136000 |
| H | -1.914551000 | 1.836379000 | -6.690936000 |
| C | 0.015533000  | 2.239719000 | -5.828941000 |
| H | 0.396580000  | 2.720837000 | -6.725791000 |
| C | 0.845328000  | 2.129962000 | -4.705038000 |

|   |              |              |              |
|---|--------------|--------------|--------------|
| H | 1.857380000  | 2.524790000  | -4.726107000 |
| C | 0.331849000  | 1.509035000  | -3.570616000 |
| C | -2.322246000 | -0.006001000 | -1.593957000 |
| H | -3.249452000 | -0.045080000 | -2.170335000 |
| C | -3.545195000 | -1.031889000 | 0.172657000  |
| C | -4.099959000 | -2.186668000 | -0.449660000 |
| C | -5.247273000 | -2.770212000 | 0.102609000  |
| H | -5.674157000 | -3.647210000 | -0.378675000 |
| C | -5.847950000 | -2.268828000 | 1.248768000  |
| H | -6.734863000 | -2.743407000 | 1.659940000  |
| C | -5.306074000 | -1.139412000 | 1.855995000  |
| H | -5.789568000 | -0.731769000 | 2.739075000  |
| C | -4.176766000 | -0.505824000 | 1.336759000  |
| C | -3.500291000 | -2.832162000 | -1.694646000 |
| H | -2.554420000 | -2.329507000 | -1.916509000 |
| C | -4.417112000 | -2.655049000 | -2.915294000 |
| H | -5.376628000 | -3.162971000 | -2.764332000 |
| H | -3.952450000 | -3.075805000 | -3.813853000 |
| H | -4.633290000 | -1.600153000 | -3.108912000 |
| C | -3.184999000 | -4.322187000 | -1.494306000 |
| H | -2.511976000 | -4.483401000 | -0.646952000 |
| H | -2.700893000 | -4.730805000 | -2.388250000 |
| H | -4.090129000 | -4.912815000 | -1.315162000 |
| C | -3.691984000 | 0.800116000  | 1.946960000  |
| H | -2.598521000 | 0.831315000  | 1.860292000  |
| C | -4.223931000 | 1.994587000  | 1.139193000  |
| H | -3.917821000 | 1.925145000  | 0.092198000  |
| H | -3.846258000 | 2.940517000  | 1.544439000  |
| H | -5.318917000 | 2.020751000  | 1.174667000  |
| C | -4.019055000 | 0.968557000  | 3.433059000  |
| H | -5.091692000 | 1.112541000  | 3.603675000  |
| H | -3.512294000 | 1.855271000  | 3.828629000  |
| H | -3.700537000 | 0.102463000  | 4.023700000  |
| C | 2.176142000  | 1.910345000  | -1.933555000 |
| H | 2.912080000  | 1.830650000  | -2.742346000 |
| H | 2.572477000  | 1.342639000  | -1.086901000 |
| C | 1.998581000  | 3.393465000  | -1.578376000 |
| H | 1.498050000  | 3.876316000  | -2.424855000 |
| H | 1.312438000  | 3.480667000  | -0.713585000 |
| C | 3.158001000  | 5.516487000  | -1.539213000 |
| H | 2.485660000  | 5.972831000  | -0.780991000 |
| H | 2.704064000  | 5.704042000  | -2.518909000 |
| C | 4.528164000  | 6.186258000  | -1.461916000 |
| H | 5.143747000  | 5.819905000  | -2.293149000 |

|    |              |              |              |
|----|--------------|--------------|--------------|
| H  | 4.414314000  | 7.269038000  | -1.592229000 |
| C  | 5.215596000  | 5.867087000  | -0.134632000 |
| H  | 4.656995000  | 6.341507000  | 0.685277000  |
| H  | 6.228352000  | 6.286292000  | -0.109612000 |
| C  | 5.246535000  | 4.355188000  | 0.086942000  |
| H  | 5.649172000  | 4.112749000  | 1.077865000  |
| H  | 5.903458000  | 3.885730000  | -0.656024000 |
| C  | 3.847566000  | 3.759544000  | -0.053597000 |
| H  | 3.896019000  | 2.672551000  | 0.064380000  |
| H  | 3.202615000  | 4.140629000  | 0.768355000  |
| C  | 0.783357000  | -1.381438000 | -1.216245000 |
| H  | 1.575501000  | -1.464913000 | -0.442423000 |
| H  | -0.039168000 | -2.067100000 | -0.938388000 |
| C  | 2.239112000  | -3.871321000 | -2.296143000 |
| H  | 3.035646000  | -3.776132000 | -1.549015000 |
| H  | 2.665424000  | -4.374611000 | -3.172195000 |
| H  | 1.465745000  | -4.527093000 | -1.880577000 |
| C  | 2.957800000  | -1.164003000 | -3.507108000 |
| H  | 2.597513000  | -0.255165000 | -3.995942000 |
| H  | 3.480204000  | -1.766830000 | -4.258417000 |
| H  | 3.689245000  | -0.879146000 | -2.742923000 |
| C  | 0.197186000  | -2.448633000 | -4.091574000 |
| H  | -0.600712000 | -3.097530000 | -3.714760000 |
| H  | 0.636476000  | -2.935958000 | -4.969256000 |
| H  | -0.253395000 | -1.505666000 | -4.411879000 |
| C  | -0.556493000 | -1.987624000 | 3.589053000  |
| H  | -0.915253000 | -1.000946000 | 3.895162000  |
| H  | 0.495343000  | -2.088388000 | 3.880201000  |
| C  | -1.406216000 | -3.139279000 | 4.105396000  |
| H  | -1.094669000 | -3.467540000 | 5.100448000  |
| H  | -2.460285000 | -2.846396000 | 4.151130000  |
| C  | -1.195284000 | -4.199165000 | 3.021430000  |
| H  | -1.979025000 | -4.960492000 | 3.005827000  |
| H  | -0.231305000 | -4.702003000 | 3.157751000  |
| C  | -1.193710000 | -3.358743000 | 1.752169000  |
| H  | -0.564563000 | -3.761858000 | 0.953902000  |
| H  | -2.204192000 | -3.187251000 | 1.369389000  |
| N  | 0.933275000  | 1.290169000  | -2.328293000 |
| N  | -2.365844000 | -0.414773000 | -0.292258000 |
| N  | 3.266370000  | 4.073299000  | -1.353622000 |
| O  | -0.640802000 | -2.072131000 | 2.143693000  |
| Si | 1.521960000  | -2.162420000 | -2.768421000 |
| Y  | -0.234709000 | -0.086757000 | 0.734697000  |
| C  | 2.090866000  | 1.134220000  | 2.825181000  |

|   |              |              |             |
|---|--------------|--------------|-------------|
| C | 2.779710000  | -0.981959000 | 2.109924000 |
| C | 3.298693000  | 1.251047000  | 3.577492000 |
| C | 3.963377000  | -0.938354000 | 2.817464000 |
| H | 3.491424000  | 2.140961000  | 4.162218000 |
| H | 4.662004000  | -1.766210000 | 2.785309000 |
| C | 4.214213000  | 0.223644000  | 3.565053000 |
| H | 5.130802000  | 0.317763000  | 4.141731000 |
| N | 1.860929000  | 0.003923000  | 2.092655000 |
| N | 1.156652000  | 2.106495000  | 2.816689000 |
| H | 2.533703000  | -1.856107000 | 1.509455000 |
| C | 1.386044000  | 3.313189000  | 3.595320000 |
| H | 2.315614000  | 3.819932000  | 3.305452000 |
| H | 0.557644000  | 3.994442000  | 3.404395000 |
| H | 1.423273000  | 3.111942000  | 4.676013000 |
| C | -0.122265000 | 1.938634000  | 2.118237000 |
| H | -0.250924000 | 2.802387000  | 1.444322000 |
| H | -0.921541000 | 2.039717000  | 2.873348000 |

### E'

|   |              |              |              |
|---|--------------|--------------|--------------|
| C | 0.438894000  | -0.068229000 | -1.427023000 |
| C | -0.996028000 | 0.238392000  | -1.709545000 |
| C | -1.007485000 | 1.323021000  | -2.699580000 |
| C | -2.040794000 | 2.034303000  | -3.305087000 |
| H | -3.077386000 | 1.820088000  | -3.056543000 |
| C | -1.740718000 | 3.039470000  | -4.228514000 |
| H | -2.544048000 | 3.597360000  | -4.701102000 |
| C | -0.409833000 | 3.337629000  | -4.532992000 |
| H | -0.184949000 | 4.127513000  | -5.245323000 |
| C | 0.642471000  | 2.640208000  | -3.937805000 |
| H | 1.672363000  | 2.881018000  | -4.185048000 |
| C | 0.334830000  | 1.615504000  | -3.034822000 |
| C | -2.142407000 | -0.194416000 | -1.044597000 |
| H | -3.093547000 | 0.220237000  | -1.389284000 |
| C | -3.367500000 | -1.657566000 | 0.426471000  |
| C | -3.799284000 | -2.768946000 | -0.348763000 |
| C | -4.962857000 | -3.454067000 | 0.011238000  |
| H | -5.284247000 | -4.302027000 | -0.589516000 |
| C | -5.714601000 | -3.083347000 | 1.118388000  |
| H | -6.614434000 | -3.631030000 | 1.385514000  |
| C | -5.303285000 | -1.990808000 | 1.871119000  |
| H | -5.904794000 | -1.678351000 | 2.721603000  |
| C | -4.152268000 | -1.265117000 | 1.548644000  |
| C | -3.031555000 | -3.250477000 | -1.570264000 |
| H | -2.117079000 | -2.655308000 | -1.640886000 |

|   |              |              |              |
|---|--------------|--------------|--------------|
| C | -3.837431000 | -3.018481000 | -2.856752000 |
| H | -4.782724000 | -3.572967000 | -2.838839000 |
| H | -3.275156000 | -3.350472000 | -3.736812000 |
| H | -4.075053000 | -1.958525000 | -2.986368000 |
| C | -2.622246000 | -4.725025000 | -1.446686000 |
| H | -2.013902000 | -4.897829000 | -0.552337000 |
| H | -2.039358000 | -5.037366000 | -2.320210000 |
| H | -3.493239000 | -5.386451000 | -1.383827000 |
| C | -3.848601000 | -0.013146000 | 2.355496000  |
| H | -2.828217000 | 0.300339000  | 2.106772000  |
| C | -4.780648000 | 1.134572000  | 1.937360000  |
| H | -4.687542000 | 1.346226000  | 0.868141000  |
| H | -4.545500000 | 2.052576000  | 2.488938000  |
| H | -5.827586000 | 0.878606000  | 2.137637000  |
| C | -3.907698000 | -0.224708000 | 3.872766000  |
| H | -4.926346000 | -0.429223000 | 4.219998000  |
| H | -3.564572000 | 0.674998000  | 4.396596000  |
| H | -3.281237000 | -1.065112000 | 4.189197000  |
| C | 2.569068000  | 1.127718000  | -2.112096000 |
| H | 3.062875000  | 1.364296000  | -3.062366000 |
| H | 3.070759000  | 0.239712000  | -1.716968000 |
| C | 2.744379000  | 2.330136000  | -1.172558000 |
| H | 2.127618000  | 3.146844000  | -1.564306000 |
| H | 2.342860000  | 2.081628000  | -0.170742000 |
| C | 4.205036000  | 4.163013000  | -0.597177000 |
| H | 3.865913000  | 4.216402000  | 0.460026000  |
| H | 3.523942000  | 4.792686000  | -1.181220000 |
| C | 5.629031000  | 4.705408000  | -0.694767000 |
| H | 5.909440000  | 4.762740000  | -1.754100000 |
| H | 5.661421000  | 5.725010000  | -0.292495000 |
| C | 6.607793000  | 3.795127000  | 0.046947000  |
| H | 6.396639000  | 3.838446000  | 1.125293000  |
| H | 7.639706000  | 4.140751000  | -0.086342000 |
| C | 6.450529000  | 2.354800000  | -0.439090000 |
| H | 7.076755000  | 1.673073000  | 0.149030000  |
| H | 6.778404000  | 2.279853000  | -1.483600000 |
| C | 4.992006000  | 1.907838000  | -0.354267000 |
| H | 4.898659000  | 0.893521000  | -0.755534000 |
| H | 4.681684000  | 1.862098000  | 0.712077000  |
| C | 0.871790000  | -1.542932000 | -1.432274000 |
| H | 1.775046000  | -1.708111000 | -0.818805000 |
| H | 0.078460000  | -2.148768000 | -0.970855000 |
| C | 1.296454000  | -4.250703000 | -2.810408000 |
| H | 2.099271000  | -4.496272000 | -2.105365000 |

|    |              |              |              |
|----|--------------|--------------|--------------|
| H  | 1.493925000  | -4.802370000 | -3.736206000 |
| H  | 0.357318000  | -4.626466000 | -2.392156000 |
| C  | 2.913809000  | -1.889065000 | -3.856336000 |
| H  | 2.927140000  | -0.847383000 | -4.186816000 |
| H  | 3.137130000  | -2.519832000 | -4.724427000 |
| H  | 3.723469000  | -2.030447000 | -3.131979000 |
| C  | -0.130134000 | -1.978651000 | -4.391955000 |
| H  | -1.118211000 | -2.254972000 | -4.014110000 |
| H  | 0.042216000  | -2.520112000 | -5.328790000 |
| H  | -0.147262000 | -0.907541000 | -4.612781000 |
| C  | -0.089601000 | -1.580698000 | 3.786207000  |
| H  | -0.738649000 | -0.734087000 | 4.024988000  |
| H  | 0.897705000  | -1.400019000 | 4.226626000  |
| C  | -0.661020000 | -2.928744000 | 4.202114000  |
| H  | -0.397015000 | -3.187473000 | 5.230852000  |
| H  | -1.752511000 | -2.926010000 | 4.116578000  |
| C  | -0.052917000 | -3.869960000 | 3.160852000  |
| H  | -0.603717000 | -4.807788000 | 3.054447000  |
| H  | 0.985537000  | -4.109161000 | 3.416508000  |
| C  | -0.117663000 | -3.025268000 | 1.897395000  |
| H  | 0.674293000  | -3.245167000 | 1.177636000  |
| H  | -1.089000000 | -3.090008000 | 1.397796000  |
| N  | 1.190187000  | 0.770206000  | -2.361662000 |
| N  | -2.171996000 | -0.981898000 | 0.105182000  |
| N  | 4.121977000  | 2.800543000  | -1.112169000 |
| O  | 0.061850000  | -1.651368000 | 2.345473000  |
| Si | 1.223901000  | -2.374194000 | -3.134130000 |
| Y  | -0.398202000 | 0.226563000  | 0.808766000  |
| C  | 0.908454000  | 2.538355000  | 2.847179000  |
| C  | 2.298371000  | 0.658540000  | 2.855557000  |
| C  | 1.831345000  | 3.200761000  | 3.711688000  |
| C  | 3.226584000  | 1.232929000  | 3.700227000  |
| H  | 1.646845000  | 4.219403000  | 4.027036000  |
| H  | 4.116646000  | 0.693080000  | 4.001743000  |
| C  | 2.967538000  | 2.545596000  | 4.128503000  |
| H  | 3.668295000  | 3.056518000  | 4.783848000  |
| N  | 1.173385000  | 1.264171000  | 2.432158000  |
| N  | -0.227136000 | 3.123545000  | 2.415707000  |
| H  | 2.445412000  | -0.353315000 | 2.481163000  |
| C  | -0.519153000 | 4.489714000  | 2.817449000  |
| H  | 0.164844000  | 5.217381000  | 2.355724000  |
| H  | -1.532222000 | 4.723874000  | 2.490744000  |
| H  | -0.476055000 | 4.614260000  | 3.906504000  |
| C  | -1.046367000 | 2.499600000  | 1.370327000  |



|   |              |             |             |
|---|--------------|-------------|-------------|
| H | -0.906439000 | 3.080050000 | 0.438098000 |
| H | -2.100604000 | 2.639684000 | 1.647727000 |

### Computational details

The optimization of yttrium complexes was carried out by employing DFT hybrid functional (B3PW91)<sup>5</sup> along with small core pseudopotential Stuttgart basis set for yttrium, and silicon atoms with additional polarization functions for silicon atoms.<sup>6</sup> Pople basis sets (6-31G\*\*) were employed for the rest of the atoms.<sup>7</sup> Frequency calculations were performed to locate minima for the optimized structures (maxima for TS structures). All the calculations were performed using Gaussian 09 suite of programs.<sup>8</sup>

**Table S16.** Computed natural charges for **2d**

| Atom Label | Natural Charges |
|------------|-----------------|
| Y1         | 2.06384         |
| O2         | -0.66034        |
| N16        | -0.62955        |
| N34        | -0.67278        |
| C35        | -0.25802        |
| C84        | -0.23958        |
| C133       | -1.69700        |

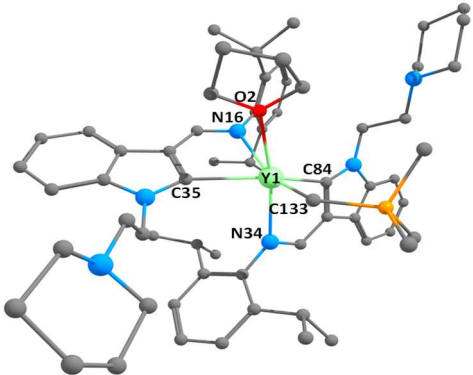

**Table S17.** Computed Wiberg bond index between selected atoms in **2d**

| Atom Label | Wiberg bond index | Atom Label | Wiberg bond index | Atom Label | Wiberg bond index |
|------------|-------------------|------------|-------------------|------------|-------------------|
| Y1         | 0.0000            | Y1         | 0.0000            | Y1         | 0.0000            |
| O2         | 0.0967            | N16        | 0.1307            | N34        | 0.1527            |
| Atom Label | Wiberg bond index | Atom Label | Wiberg bond index | Atom Label | Wiberg bond index |
| Y1         | 0.0000            | Y1         | 0.0000            | Y1         | 0.0000            |
| C35        | 0.2640            | C84        | 0.2748            | C133       | 0.3361            |

### SD1. Bonding analysis from NBO computation for **2d**

(1.92570) BD(1) Y1-C35

(6.20%) 0.2489\* Y1 s (17.47%) p 0.15 (2.63%) d 4.57 (79.89%)

(93.80%) 0.9685\* C35 s (35.47%) p 1.82 (64.51%) d 0.00 (0.02%)

(1.92706) BD(1)Y1-C84

(6.61%) 0.2571\* Y1 s (26.81%) p 0.09 (2.43%) d 2.64 (70.76%)

(93.39%) 0.9664\* C84 s (35.60%) p 1.81 (64.38%) d 0.00 (0.02%)

(1.93417) BD(1) Y1-C133

(7.43%) 0.2726\* Y1 s (28.55%) p 0.02 (0.68%) d 2.48 (70.77%)

(92.57%) 0.9621\* C133 s (23.09%) p 3.33 (76.91%) d 0.00 (0.01%)

**Table S18.** DFT computed NBO second order perturbation analysis for **2d**

| Donor NBO                                                                                                                                                  | Acceptor NBO                                                   | E(2) kcal/mol |
|------------------------------------------------------------------------------------------------------------------------------------------------------------|----------------------------------------------------------------|---------------|
| (1.97498) BD(1) N16-C55<br>(60.16%) 0.7756* N16 s(37.57%)p<br>1.66(62.32%)d 0.00(0.12%)<br>(39.84%) 0.6312* C 55 s(26.58%)p<br>2.76(73.30%)d 0.00(0.12%)   | (0.08910) LV (2) Y1<br>s(1.72%)p<br>0.26(0.45%)d56.80(97.83%)  | 6.01          |
| (1.90075) BD (2) N16-C55<br>(93.69%) 0.9679* N16 s(19.93%)p<br>4.01(80.02%)d 0.00(0.05%)<br>(6.31%) 0.2513* C55<br>s(1.77%)p55.43(97.92%)d 0.18(0.32%)     | (0.08910) LV (2) Y1<br>s(1.72%)p<br>0.26(0.45%)d56.80(97.83%)  | 11.00         |
| (1.97950) BD (1) N34-C102<br>(60.35%) 0.7768* N34 s(41.47%)p<br>1.41(58.40%)d 0.00(0.12%)<br>(39.65%) 0.6297* C102 s(32.39%)p<br>2.08(67.48%)d 0.00(0.13%) | (0.13861) LV (1) Y1<br>s(23.65%)p 0.01(0.15%)d<br>3.22(76.19%) | 8.43          |
| (1.97647) BD (1) N34-C104<br>(60.29%) 0.7765* N34 s(36.67%)p<br>1.72(63.22%)d 0.00(0.11%)<br>(39.71%) 0.6301* C104 s(26.87%)p<br>2.72(73.02%)d 0.00(0.12%) | (0.13861) LV (1) Y1<br>s(23.65%)p 0.01(0.15%)d<br>3.22(76.19%) | 7.60          |
| (1.96148) BD (1) C35-C36<br>(46.92%) 0.6850* C35 s(35.46%)p<br>1.82(64.43%)d 0.00(0.12%)<br>(53.08%) 0.7286* C36 s(32.66%)p<br>2.06(67.28%)d 0.00(0.06%)   | (0.13861) LV (1) Y1<br>s(23.65%)p 0.01(0.15%)d<br>3.22(76.19%) | 25.30         |
| (1.93816) LP (1) O2<br>s(36.19%)p 1.76(63.79%)d 0.00(0.02%)                                                                                                | (0.13861) LV (1) Y1<br>s(23.65%)p 0.01(0.15%)d<br>3.22(76.19%) | 20.82         |
| (1.93585) LP(2) O2<br>s(4.44%)p21.49(95.50%)d 0.01(0.05%)                                                                                                  | (0.13861) LV (1) Y1<br>s(23.65%)p 0.01(0.15%)d<br>3.22(76.19%) | 4.54          |

**Fig. S52.** Computed MOs for **2d**. Left-HOMO, Right-LUMO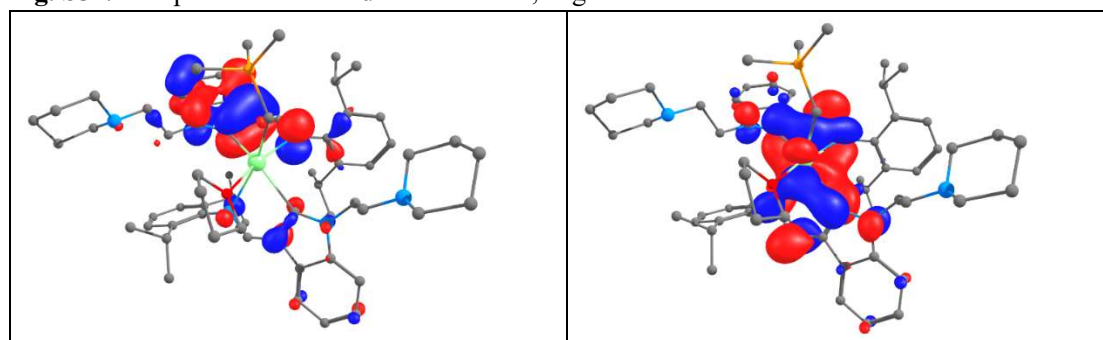

**Table S19.** Computed natural charges for **A3**

| Atom Label | Natural Charges |
|------------|-----------------|
| Y1         | 2.05247         |
| N3         | -0.66626        |
| N21        | -0.67304        |
| C22        | -0.21544        |
| C71        | -0.20662        |
| N139       | -0.65335        |
| C151       | -0.90134        |

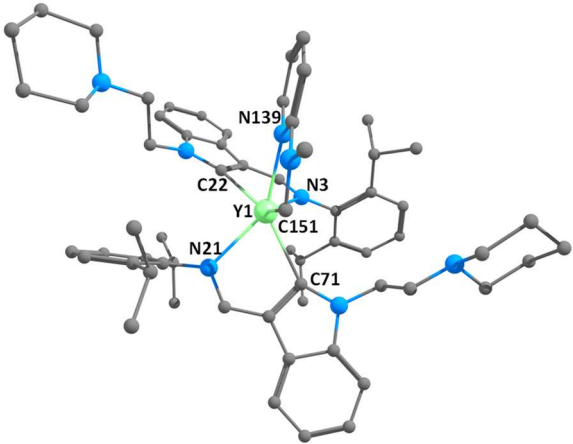
**Table S20.** Computed Wiberg bond index between selected atoms in **A3**

| Atom Label | Wiberg bond index | Atom Label | Wiberg bond index | Atom Label | Wiberg bond index |
|------------|-------------------|------------|-------------------|------------|-------------------|
| Y1         | 0.0000            | Y1         | 0.0000            | Y1         | 0.0000            |
| N3         | 0.1645            | N21        | 0.1702            | C22        | 0.2730            |
| Atom Label | Wiberg bond index | Atom Label | Wiberg bond index | Atom Label | Wiberg bond index |
| Y1         | 0.0000            | Y1         | 0.0000            | Y1         | 0.0000            |
| C71        | 0.2830            | N139       | 0.1475            | C151       | 0.3151            |

**SD2.** Bonding analysis from NBO computation for **A3**

(1.92335) BD (1) Y1-C22

(6.52%) 0.2553\* Y1 s(15.05%)p 0.18(2.75%)d 5.46(82.20%)

(93.48%) 0.9669\* C22 s(36.43%)p 1.74(63.55%)d 0.00(0.02%)

(1.92694) BD (1) Y1-C71

(7.08%) 0.2661\* Y1 s(28.76%)p 0.08(2.42%)d 2.39(68.82%)

(92.92%) 0.9639\* C71 s(36.47%)p 1.74(63.51%)d 0.00(0.02%)

(1.94910) BD (1) Y1-C151

(7.92%) 0.2814\* Y1 s(26.29%)p 0.03(0.70%)d 2.78(73.01%)

(92.08%) 0.9596\* C151 s(26.65%)p 2.75(73.35%)d 0.00(0.00%)

**Table S21.** DFT computed NBO second order perturbation analysis for **A3**

| Donor NBO                                                    | Acceptor NBO                                                                                                              | E(2) kcal/mol |
|--------------------------------------------------------------|---------------------------------------------------------------------------------------------------------------------------|---------------|
| (1.87237) LP(1) N139<br>s(26.18%)p 2.82(73.78%)d 0.00(0.04%) | (0.15254) LV(1) Y1<br>s(28.05%)p 0.01(0.23%)d 2.56(71.73%)                                                                | 12.85         |
| (1.87237) LP(1) N139<br>s(26.18%)p 2.82(73.78%)d 0.00(0.04%) | (0.09759) LV(2) Y1<br>s(0.68%)p 0.25(0.17%)d99.99(99.15%)                                                                 | 7.98          |
| (1.87237) LP(1) N139<br>s(26.18%)p 2.82(73.78%)d 0.00(0.04%) | (0.06919) BD*(1) Y1-C71<br>(92.92%) 0.9639* Y1 s(28.76%)p<br>0.08(2.42%)d 2.39(68.82%)<br>(7.08%)-0.2661* C71 s( 36.47%)p | 11.74         |

|                                                                                                                                                            |                                                             |       |
|------------------------------------------------------------------------------------------------------------------------------------------------------------|-------------------------------------------------------------|-------|
|                                                                                                                                                            | 1.74(63.51%)d 0.00(0.02%)                                   |       |
| (1.97866) BD(1) N3-C40<br>(60.30%) 0.7765* N3 s(40.59%)p<br>1.46(59.29%)d 0.00(0.13%)<br>(39.70%) 0.6301* C40 s(32.31%)p<br>2.09(67.56%)d 0.00(0.13%)      | (0.09759) LV(2) Y1<br>s(0.68%)p 0.25(0.17%)d99.99(99.15%)   | 6.85  |
| (1.97652) BD(1) N3-C42<br>(60.27%) 0.7764* N3 s(35.61%)p<br>1.80(64.28%)d 0.00(0.11%)<br>(39.73%) 0.6303* C42 s(27.08%)p<br>2.69( 72.81%)d 0.00(0.11%)     | (0.09759) LV (2) Y1<br>s(0.68%)p 0.25(0.17%)d99.99(99.15%)  | 6.04  |
| (1.89204) BD(2) N3-C42<br>(94.21%) 0.9706* N3 s(22.73%)p<br>3.40(77.24%)d 0.00(0.03%)<br>(5.79%) 0.2407* C42<br>s(1.10%)p89.26(98.59%)d 0.28(0.31%)        | (0.15254) LV (1) Y1<br>s(28.05%)p 0.01(0.23%)d 2.56(71.73%) | 6.74  |
| (1.89204) BD(2) N3-C42<br>(94.21%) 0.9706* N3 s( 22.73%)p<br>3.40(77.24%)d 0.00(0.03%)<br>(5.79%) 0.2407*C42<br>s(1.10%)p89.26(98.59%)d 0.28(0.31%)        | (0.09759) LV (2) Y1<br>s(0.68%)p 0.25(0.17%)d99.99( 99.15%) | 13.17 |
| (1.97818) BD(1) N21-C89<br>( 60.34%) 0.7768* N21 s(41.37%)p<br>1.41(58.50%)d 0.00(0.13%)<br>(39.66%) 0.6297* C89 s(32.44%)p<br>2.08(67.43%)d 0.00(0.13%)   | (0.15254) LV (1) Y1<br>s(28.05%)p 0.01(0.23%)d 2.56(71.73%) | 8.94  |
| (1.97681) BD(1) N21-C91<br>(60.13%) 0.7754* N 21 s(35.46%)p<br>1.82( 64.43%)d 0.00(0.11%)<br>(39.87%) 0.6314* C 91 s(27.15%)p<br>2.68(72.74%)d 0.00(0.11%) | (0.15254) LV (1) Y1<br>s(28.05%)p 0.01(0.23%)d 2.56(71.73%) | 8.04  |
| (1.89161) BD(2) N21-C91<br>(94.23%) 0.9707* N 21 s(23.13%)p<br>3.32( 76.84%)d 0.00(0.03%)<br>(5.77%) 0.2401* C91<br>s(1.01%)p97.69(98.70%)d 0.28(0.29%)    | (0.15254) LV (1) Y1<br>s(28.05%)p 0.01(0.23%)d 2.56(71.73%) | 31.12 |

**Fig. S53.** Computed MOs for A3. Left-HOMO, Right-LUMO

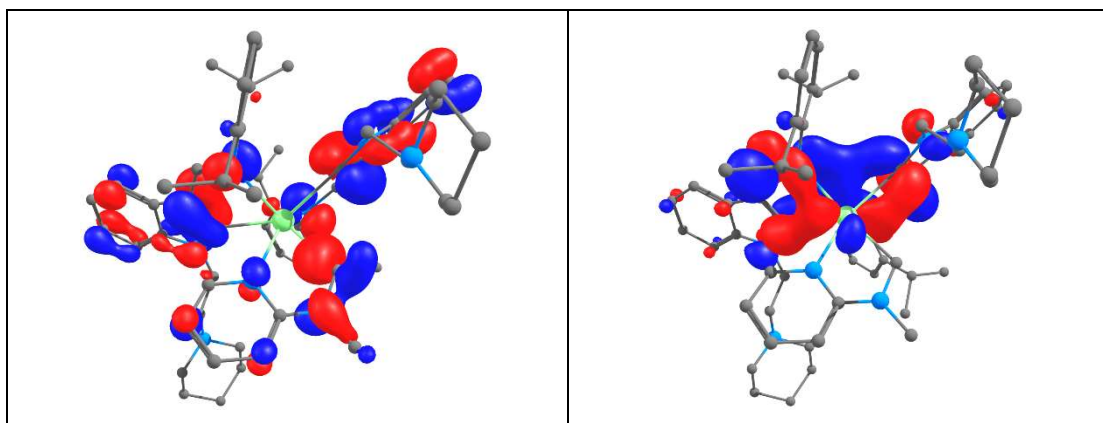

### Optimized geometries

#### 2d

|   |              |              |              |
|---|--------------|--------------|--------------|
| Y | 11.199573000 | 8.364359000  | 13.878395000 |
| O | 9.531988000  | 10.238444000 | 14.045355000 |
| C | 8.948907000  | 10.961106000 | 12.928841000 |
| H | 8.633642000  | 10.226280000 | 12.181534000 |
| H | 9.721490000  | 11.594424000 | 12.489408000 |
| C | 7.768710000  | 11.730707000 | 13.507925000 |
| H | 6.979395000  | 11.885114000 | 12.767284000 |
| H | 8.088777000  | 12.713484000 | 13.871177000 |
| C | 7.340412000  | 10.843095000 | 14.678307000 |
| H | 6.757463000  | 11.373280000 | 15.436029000 |
| H | 6.749171000  | 9.992953000  | 14.321039000 |
| C | 8.682661000  | 10.367097000 | 15.210663000 |
| H | 9.130934000  | 11.102476000 | 15.888379000 |
| H | 8.646956000  | 9.393164000  | 15.698191000 |
| N | 10.727899000 | 8.814425000  | 10.263808000 |
| N | 12.698207000 | 10.537692000 | 13.626560000 |
| N | 13.196310000 | 8.174943000  | 16.986839000 |
| N | 11.332982000 | 10.371557000 | 19.419294000 |
| C | 10.137069000 | 10.117979000 | 20.222237000 |
| H | 10.363784000 | 9.436309000  | 21.068979000 |
| H | 9.401454000  | 9.605672000  | 19.592448000 |
| C | 9.545596000  | 11.414032000 | 20.767993000 |
| H | 9.217256000  | 12.034502000 | 19.924253000 |
| H | 8.657131000  | 11.183424000 | 21.367534000 |
| C | 10.579886000 | 12.176616000 | 21.595387000 |
| H | 10.810540000 | 11.603356000 | 22.504688000 |
| H | 10.180875000 | 13.142960000 | 21.924989000 |
| C | 11.858202000 | 12.366476000 | 20.780204000 |
| H | 11.663522000 | 13.045252000 | 19.940332000 |
| H | 12.647200000 | 12.822514000 | 21.389766000 |
| C | 12.358072000 | 11.034648000 | 20.224978000 |

|   |              |              |              |
|---|--------------|--------------|--------------|
| H | 13.240605000 | 11.212472000 | 19.603442000 |
| H | 12.678332000 | 10.382477000 | 21.065529000 |
| N | 12.483764000 | 6.304290000  | 13.247572000 |
| C | 11.247472000 | 9.103688000  | 11.495591000 |
| C | 11.960720000 | 10.316496000 | 11.336866000 |
| C | 11.852746000 | 10.761034000 | 9.965976000  |
| C | 12.328960000 | 11.850457000 | 9.223620000  |
| H | 12.940320000 | 12.619210000 | 9.689783000  |
| C | 12.010996000 | 11.937618000 | 7.872828000  |
| H | 12.375880000 | 12.778765000 | 7.289682000  |
| C | 11.226136000 | 10.955143000 | 7.246723000  |
| H | 10.994041000 | 11.048172000 | 6.189542000  |
| C | 10.739987000 | 9.863779000  | 7.960019000  |
| H | 10.133017000 | 9.105736000  | 7.473369000  |
| C | 11.061464000 | 9.784039000  | 9.316482000  |
| C | 9.914499000  | 7.654557000  | 9.941165000  |
| H | 10.128347000 | 6.892354000  | 10.692432000 |
| H | 10.228704000 | 7.257207000  | 8.969821000  |
| C | 8.420428000  | 8.001540000  | 9.875090000  |
| H | 8.032740000  | 8.133924000  | 10.906299000 |
| H | 8.321223000  | 8.970261000  | 9.371803000  |
| C | 12.680180000 | 10.952352000 | 12.388097000 |
| H | 13.261836000 | 11.844687000 | 12.124894000 |
| C | 13.520998000 | 11.266330000 | 14.543729000 |
| C | 12.993564000 | 12.371843000 | 15.251078000 |
| C | 13.817343000 | 13.043098000 | 16.161212000 |
| H | 13.423870000 | 13.899394000 | 16.701398000 |
| C | 15.127474000 | 12.640813000 | 16.385347000 |
| H | 15.751757000 | 13.175121000 | 17.096662000 |
| C | 15.637173000 | 11.556482000 | 15.681083000 |
| H | 16.666177000 | 11.250833000 | 15.845804000 |
| C | 14.858821000 | 10.856790000 | 14.754244000 |
| C | 11.578999000 | 12.874914000 | 15.011600000 |
| H | 11.017418000 | 12.049396000 | 14.563033000 |
| C | 11.575604000 | 14.044815000 | 14.014064000 |
| H | 12.157236000 | 14.887906000 | 14.403744000 |
| H | 10.554562000 | 14.399644000 | 13.829761000 |
| H | 12.012684000 | 13.759767000 | 13.052462000 |
| C | 10.860227000 | 13.283438000 | 16.304863000 |
| H | 10.897236000 | 12.492770000 | 17.061587000 |
| H | 9.809134000  | 13.514500000 | 16.096592000 |
| H | 11.294785000 | 14.187029000 | 16.746805000 |
| C | 15.485241000 | 9.737151000  | 13.939742000 |
| H | 14.671096000 | 9.096182000  | 13.584099000 |

|   |              |              |              |
|---|--------------|--------------|--------------|
| C | 16.445227000 | 8.856038000  | 14.745707000 |
| H | 17.358633000 | 9.392853000  | 15.025659000 |
| H | 16.753503000 | 7.995053000  | 14.144528000 |
| H | 15.977437000 | 8.477973000  | 15.658068000 |
| C | 16.202867000 | 10.321963000 | 12.711867000 |
| H | 15.514981000 | 10.870742000 | 12.061654000 |
| H | 16.669433000 | 9.529427000  | 12.117070000 |
| H | 16.991481000 | 11.016903000 | 13.022449000 |
| C | 12.745516000 | 7.800995000  | 15.754402000 |
| C | 13.392120000 | 6.572790000  | 15.465247000 |
| C | 14.249321000 | 6.209167000  | 16.570518000 |
| C | 15.120779000 | 5.150234000  | 16.856582000 |
| H | 15.253080000 | 4.330897000  | 16.154443000 |
| C | 15.822010000 | 5.158568000  | 18.057085000 |
| H | 16.498536000 | 4.340414000  | 18.288497000 |
| C | 15.672215000 | 6.209021000  | 18.976931000 |
| H | 16.235104000 | 6.192663000  | 19.905906000 |
| C | 14.811059000 | 7.270894000  | 18.717798000 |
| H | 14.697999000 | 8.080625000  | 19.432472000 |
| C | 14.104717000 | 7.252947000  | 17.514136000 |
| C | 12.813145000 | 9.395294000  | 17.674932000 |
| H | 12.362941000 | 10.063333000 | 16.939265000 |
| H | 13.723977000 | 9.884726000  | 18.035006000 |
| C | 11.819131000 | 9.138517000  | 18.812279000 |
| H | 10.962335000 | 8.605747000  | 18.385883000 |
| H | 12.267136000 | 8.458350000  | 19.562210000 |
| C | 13.239363000 | 5.885837000  | 14.233745000 |
| H | 13.804009000 | 4.956469000  | 14.098970000 |
| C | 12.431388000 | 5.514054000  | 12.054650000 |
| C | 13.188822000 | 5.920434000  | 10.929299000 |
| C | 13.065152000 | 5.198374000  | 9.739766000  |
| H | 13.639325000 | 5.504827000  | 8.870786000  |
| C | 12.236275000 | 4.085521000  | 9.651414000  |
| H | 12.154379000 | 3.536019000  | 8.717376000  |
| C | 11.536061000 | 3.666653000  | 10.774251000 |
| H | 10.918026000 | 2.774987000  | 10.714077000 |
| C | 11.616630000 | 4.359075000  | 11.989073000 |
| C | 14.209423000 | 7.041140000  | 11.032544000 |
| H | 13.861732000 | 7.733733000  | 11.807084000 |
| C | 15.559101000 | 6.458437000  | 11.485102000 |
| H | 15.481705000 | 5.959496000  | 12.455649000 |
| H | 16.315878000 | 7.245630000  | 11.568400000 |
| H | 15.919879000 | 5.720305000  | 10.759608000 |
| C | 14.388287000 | 7.846292000  | 9.742737000  |

|    |              |             |              |
|----|--------------|-------------|--------------|
| H  | 14.869181000 | 7.256604000 | 8.953945000  |
| H  | 15.032369000 | 8.710792000 | 9.931158000  |
| H  | 13.434310000 | 8.217657000 | 9.360306000  |
| C  | 10.887254000 | 3.803270000 | 13.202146000 |
| H  | 10.863939000 | 4.585891000 | 13.965699000 |
| C  | 9.435857000  | 3.407367000 | 12.904671000 |
| H  | 8.868877000  | 4.241211000 | 12.480759000 |
| H  | 8.936095000  | 3.095424000 | 13.827397000 |
| H  | 9.374708000  | 2.565972000 | 12.205991000 |
| C  | 11.648367000 | 2.601564000 | 13.787215000 |
| H  | 11.704272000 | 1.783595000 | 13.059918000 |
| H  | 11.143655000 | 2.222436000 | 14.682757000 |
| H  | 12.673506000 | 2.864701000 | 14.064754000 |
| C  | 9.186335000  | 7.121699000 | 14.418371000 |
| H  | 8.360202000  | 7.716994000 | 13.986036000 |
| H  | 9.330966000  | 6.292719000 | 13.697607000 |
| Si | 8.510627000  | 6.288791000 | 15.958698000 |
| C  | 7.971006000  | 7.527686000 | 17.313469000 |
| H  | 8.792308000  | 8.172607000 | 17.643920000 |
| H  | 7.617519000  | 6.972942000 | 18.190226000 |
| H  | 7.145043000  | 8.166917000 | 16.980887000 |
| C  | 6.940038000  | 5.255734000 | 15.610891000 |
| H  | 6.132808000  | 5.894439000 | 15.233728000 |
| H  | 6.575004000  | 4.755884000 | 16.515874000 |
| H  | 7.129750000  | 4.486759000 | 14.855012000 |
| C  | 9.787303000  | 5.133939000 | 16.768777000 |
| H  | 10.019004000 | 4.276695000 | 16.128448000 |
| H  | 9.405575000  | 4.740988000 | 17.718028000 |
| H  | 10.725445000 | 5.661504000 | 16.967830000 |
| N  | 7.647883000  | 7.031602000 | 9.118256000  |
| C  | 6.312635000  | 7.540324000 | 8.819517000  |
| H  | 6.418411000  | 8.519941000 | 8.338212000  |
| H  | 5.726785000  | 7.700679000 | 9.750204000  |
| C  | 5.547739000  | 6.588106000 | 7.904156000  |
| H  | 6.070698000  | 6.532233000 | 6.941034000  |
| H  | 4.548052000  | 6.994127000 | 7.709475000  |
| C  | 5.460112000  | 5.194033000 | 8.524565000  |
| H  | 4.832329000  | 5.236811000 | 9.426109000  |
| H  | 4.975870000  | 4.491522000 | 7.836368000  |
| C  | 6.857139000  | 4.705657000 | 8.905257000  |
| H  | 7.451195000  | 4.542125000 | 7.997146000  |
| H  | 6.805759000  | 3.748744000 | 9.437446000  |
| C  | 7.575823000  | 5.730879000 | 9.779792000  |
| H  | 7.052969000  | 5.813624000 | 10.756668000 |



|   |             |             |             |
|---|-------------|-------------|-------------|
| H | 8.591327000 | 5.381170000 | 9.989934000 |
|---|-------------|-------------|-------------|

**A1**

|   |              |              |              |
|---|--------------|--------------|--------------|
| Y | -0.165542000 | -0.124800000 | 0.077244000  |
| N | -0.810952000 | 0.146105000  | -3.541015000 |
| N | 1.358086000  | 1.999073000  | -0.367138000 |
| N | 2.199947000  | -0.665680000 | 2.971038000  |
| N | 0.821250000  | 1.572293000  | 5.665833000  |
| C | -0.075821000 | 1.276818000  | 6.784947000  |
| H | 0.439445000  | 0.658383000  | 7.548924000  |
| H | -0.909227000 | 0.674470000  | 6.404141000  |
| C | -0.599791000 | 2.548602000  | 7.446087000  |
| H | -1.214855000 | 3.102141000  | 6.724801000  |
| H | -1.251865000 | 2.277248000  | 8.284338000  |
| C | 0.555098000  | 3.433589000  | 7.912180000  |
| H | 1.094654000  | 2.928131000  | 8.725575000  |
| H | 0.180805000  | 4.378770000  | 8.321889000  |
| C | 1.512160000  | 3.685573000  | 6.749548000  |
| H | 1.013888000  | 4.293842000  | 5.984019000  |
| H | 2.394316000  | 4.244858000  | 7.081965000  |
| C | 1.963246000  | 2.373504000  | 6.113343000  |
| H | 2.600891000  | 2.595061000  | 5.252824000  |
| H | 2.579141000  | 1.804487000  | 6.841133000  |
| N | 0.911297000  | -2.277982000 | -0.754105000 |
| C | -0.220609000 | 0.477097000  | -2.350927000 |
| C | 0.530941000  | 1.648795000  | -2.611691000 |
| C | 0.381289000  | 2.020417000  | -4.000213000 |
| C | 0.870405000  | 3.042249000  | -4.825333000 |
| H | 1.533397000  | 3.809097000  | -4.432459000 |
| C | 0.497797000  | 3.064044000  | -6.164728000 |
| H | 0.872275000  | 3.852550000  | -6.811886000 |
| C | -0.354437000 | 2.083023000  | -6.698156000 |
| H | -0.627966000 | 2.124572000  | -7.748702000 |
| C | -0.855575000 | 1.058446000  | -5.900987000 |
| H | -1.516414000 | 0.301015000  | -6.312666000 |
| C | -0.477902000 | 1.045017000  | -4.556618000 |
| C | -1.705741000 | -0.975930000 | -3.772926000 |
| H | -1.549881000 | -1.687517000 | -2.961109000 |
| H | -1.414259000 | -1.472016000 | -4.705405000 |
| C | -3.172842000 | -0.530078000 | -3.885141000 |
| H | -3.594730000 | -0.388890000 | -2.870046000 |
| H | -3.193056000 | 0.450259000  | -4.375121000 |
| C | 1.303029000  | 2.327145000  | -1.631212000 |
| H | 1.898195000  | 3.181780000  | -1.974230000 |

|   |              |              |              |
|---|--------------|--------------|--------------|
| C | 2.221733000  | 2.777758000  | 0.465862000  |
| C | 1.760698000  | 3.987451000  | 1.039298000  |
| C | 2.614401000  | 4.685404000  | 1.901710000  |
| H | 2.273971000  | 5.616760000  | 2.345276000  |
| C | 3.890503000  | 4.220536000  | 2.192546000  |
| H | 4.536920000  | 4.778795000  | 2.864760000  |
| C | 4.344636000  | 3.049899000  | 1.594857000  |
| H | 5.354644000  | 2.705629000  | 1.797185000  |
| C | 3.535549000  | 2.316642000  | 0.722440000  |
| C | 0.403152000  | 4.580231000  | 0.688722000  |
| H | -0.227810000 | 3.767329000  | 0.314250000  |
| C | 0.534270000  | 5.621056000  | -0.436392000 |
| H | 1.176791000  | 6.451350000  | -0.121625000 |
| H | -0.447184000 | 6.032019000  | -0.698086000 |
| H | 0.969578000  | 5.191331000  | -1.342541000 |
| C | -0.311212000 | 5.214377000  | 1.889587000  |
| H | -0.342963000 | 4.537034000  | 2.747524000  |
| H | -1.340705000 | 5.471114000  | 1.618275000  |
| H | 0.176552000  | 6.141226000  | 2.211184000  |
| C | 4.106061000  | 1.116534000  | -0.015598000 |
| H | 3.264824000  | 0.471711000  | -0.292804000 |
| C | 5.076627000  | 0.273016000  | 0.816052000  |
| H | 6.011085000  | 0.806249000  | 1.024691000  |
| H | 5.343463000  | -0.634602000 | 0.265888000  |
| H | 4.636638000  | -0.033951000 | 1.767965000  |
| C | 4.793334000  | 1.585179000  | -1.309496000 |
| H | 4.100039000  | 2.109612000  | -1.973651000 |
| H | 5.208707000  | 0.733722000  | -1.859205000 |
| H | 5.616606000  | 2.271345000  | -1.079769000 |
| C | 1.566491000  | -0.917083000 | 1.779674000  |
| C | 2.028981000  | -2.195792000 | 1.382220000  |
| C | 2.950458000  | -2.715663000 | 2.364516000  |
| C | 3.710835000  | -3.884081000 | 2.504593000  |
| H | 3.658516000  | -4.677096000 | 1.763061000  |
| C | 4.541385000  | -4.019245000 | 3.610950000  |
| H | 5.133491000  | -4.922437000 | 3.730302000  |
| C | 4.630672000  | -3.004688000 | 4.577848000  |
| H | 5.292005000  | -3.132691000 | 5.430131000  |
| C | 3.882473000  | -1.837298000 | 4.462553000  |
| H | 3.957854000  | -1.056159000 | 5.212981000  |
| C | 3.041763000  | -1.713268000 | 3.354437000  |
| C | 2.081216000  | 0.544743000  | 3.762170000  |
| H | 1.643018000  | 1.317427000  | 3.130215000  |
| H | 3.091723000  | 0.881225000  | 4.017966000  |

|    |              |              |              |
|----|--------------|--------------|--------------|
| C  | 1.232492000  | 0.328312000  | 5.022301000  |
| H  | 0.326956000  | -0.214638000 | 4.727048000  |
| H  | 1.774642000  | -0.331440000 | 5.726135000  |
| C  | 1.697292000  | -2.806061000 | 0.147601000  |
| H  | 2.158713000  | -3.776081000 | -0.069734000 |
| C  | 0.741937000  | -3.023965000 | -1.965314000 |
| C  | 1.491503000  | -2.649406000 | -3.106944000 |
| C  | 1.276266000  | -3.335761000 | -4.304487000 |
| H  | 1.840486000  | -3.052976000 | -5.187903000 |
| C  | 0.367389000  | -4.385873000 | -4.383860000 |
| H  | 0.214658000  | -4.907823000 | -5.324790000 |
| C  | -0.318066000 | -4.781989000 | -3.243877000 |
| H  | -0.994323000 | -5.630893000 | -3.296461000 |
| C  | -0.146055000 | -4.123401000 | -2.019292000 |
| C  | 2.594564000  | -1.607829000 | -3.013200000 |
| H  | 2.306318000  | -0.894016000 | -2.233413000 |
| C  | 3.907555000  | -2.283006000 | -2.580629000 |
| H  | 3.814868000  | -2.776561000 | -1.609067000 |
| H  | 4.716289000  | -1.547667000 | -2.508371000 |
| H  | 4.207337000  | -3.041265000 | -3.313103000 |
| C  | 2.817820000  | -0.816409000 | -4.304661000 |
| H  | 3.263156000  | -1.435578000 | -5.091912000 |
| H  | 3.512187000  | 0.008868000  | -4.118560000 |
| H  | 1.887587000  | -0.390316000 | -4.687971000 |
| C  | -0.853096000 | -4.669512000 | -0.787796000 |
| H  | -0.764542000 | -3.925701000 | 0.009219000  |
| C  | -2.347881000 | -4.925141000 | -1.014850000 |
| H  | -2.866607000 | -4.019243000 | -1.340908000 |
| H  | -2.815588000 | -5.262953000 | -0.084570000 |
| H  | -2.522266000 | -5.704476000 | -1.764728000 |
| C  | -0.168949000 | -5.958639000 | -0.302180000 |
| H  | -0.230853000 | -6.744258000 | -1.063846000 |
| H  | -0.650890000 | -6.332824000 | 0.607852000  |
| H  | 0.890717000  | -5.798787000 | -0.080924000 |
| C  | -2.162234000 | -1.305222000 | 0.726947000  |
| H  | -2.972951000 | -0.650878000 | 0.359724000  |
| H  | -2.087567000 | -2.115170000 | -0.025605000 |
| Si | -2.831437000 | -2.134369000 | 2.268076000  |
| C  | -3.295462000 | -0.879353000 | 3.631899000  |
| H  | -2.421375000 | -0.370167000 | 4.050378000  |
| H  | -3.802244000 | -1.394663000 | 4.455817000  |
| H  | -3.980726000 | -0.117467000 | 3.244435000  |
| C  | -4.449922000 | -3.097239000 | 1.939452000  |
| H  | -5.236524000 | -2.416744000 | 1.593161000  |

|   |              |              |              |
|---|--------------|--------------|--------------|
| H | -4.814533000 | -3.598057000 | 2.844164000  |
| H | -4.311843000 | -3.859041000 | 1.165719000  |
| C | -1.582253000 | -3.351187000 | 3.030840000  |
| H | -1.370237000 | -4.186596000 | 2.355099000  |
| H | -1.964892000 | -3.773224000 | 3.967192000  |
| H | -0.630984000 | -2.851966000 | 3.241543000  |
| N | -3.973103000 | -1.436600000 | -4.693002000 |
| C | -5.277409000 | -0.854798000 | -4.996021000 |
| H | -5.115970000 | 0.133962000  | -5.442164000 |
| H | -5.871178000 | -0.697219000 | -4.070310000 |
| C | -6.069814000 | -1.738659000 | -5.955356000 |
| H | -5.533446000 | -1.788400000 | -6.911463000 |
| H | -7.045704000 | -1.279310000 | -6.152469000 |
| C | -6.234464000 | -3.146085000 | -5.382648000 |
| H | -6.874150000 | -3.101418000 | -4.489649000 |
| H | -6.740391000 | -3.802081000 | -6.100615000 |
| C | -4.869035000 | -3.713451000 | -4.997054000 |
| H | -4.268202000 | -3.874443000 | -5.901169000 |
| H | -4.975037000 | -4.684235000 | -4.499012000 |
| C | -4.117827000 | -2.753320000 | -4.077157000 |
| H | -4.652515000 | -2.679009000 | -3.105948000 |
| H | -3.122986000 | -3.156828000 | -3.863947000 |
| C | -4.501933000 | 3.343916000  | -0.172930000 |
| C | -3.968950000 | 3.164167000  | 1.087349000  |
| C | -2.748943000 | 2.456117000  | 1.232902000  |
| N | -2.110256000 | 1.917903000  | 0.163145000  |
| C | -2.656926000 | 2.126966000  | -1.049956000 |
| C | -3.829996000 | 2.824948000  | -1.281326000 |
| H | -5.434332000 | 3.889563000  | -0.291329000 |
| H | -4.475375000 | 3.566586000  | 1.954807000  |
| H | -2.108084000 | 1.697434000  | -1.879504000 |
| H | -4.202773000 | 2.947369000  | -2.291688000 |
| N | -2.174978000 | 2.316497000  | 2.460710000  |
| C | -2.835702000 | 2.832650000  | 3.641468000  |
| H | -3.816918000 | 2.367450000  | 3.798478000  |
| H | -2.218529000 | 2.610535000  | 4.511177000  |
| H | -2.968754000 | 3.921523000  | 3.589572000  |
| C | -0.907560000 | 1.637931000  | 2.596035000  |
| H | -0.505567000 | 1.819017000  | 3.595717000  |
| H | -0.177128000 | 2.035126000  | 1.879315000  |
| H | -1.020072000 | 0.547942000  | 2.473695000  |

**TS(A1-A2)**

|   |              |             |              |
|---|--------------|-------------|--------------|
| Y | 11.127770000 | 9.471322000 | 14.417697000 |
|---|--------------|-------------|--------------|

|   |              |              |              |
|---|--------------|--------------|--------------|
| N | 10.481428000 | 9.641693000  | 10.755824000 |
| N | 12.684758000 | 11.429263000 | 13.915647000 |
| N | 13.486478000 | 8.880246000  | 17.279384000 |
| N | 12.190359000 | 11.112050000 | 20.019160000 |
| C | 11.297099000 | 10.824941000 | 21.140730000 |
| H | 11.814869000 | 10.225018000 | 21.919004000 |
| H | 10.468855000 | 10.209008000 | 20.769950000 |
| C | 10.759237000 | 12.105064000 | 21.774273000 |
| H | 10.147166000 | 12.637965000 | 21.035330000 |
| H | 10.103509000 | 11.846753000 | 22.614058000 |
| C | 11.906422000 | 13.004943000 | 22.231770000 |
| H | 12.441788000 | 12.517203000 | 23.058761000 |
| H | 11.524466000 | 13.955882000 | 22.620915000 |
| C | 12.872776000 | 13.240318000 | 21.072877000 |
| H | 12.379722000 | 13.835592000 | 20.294125000 |
| H | 13.751447000 | 13.805656000 | 21.404922000 |
| C | 13.328971000 | 11.918512000 | 20.460262000 |
| H | 13.972526000 | 12.125647000 | 19.600445000 |
| H | 13.941465000 | 11.361765000 | 21.201617000 |
| N | 12.138998000 | 7.209794000  | 13.603053000 |
| C | 11.072442000 | 9.972377000  | 11.944410000 |
| C | 11.837245000 | 11.135253000 | 11.676288000 |
| C | 11.689638000 | 11.504690000 | 10.286541000 |
| C | 12.187344000 | 12.518182000 | 9.456963000  |
| H | 12.856410000 | 13.281375000 | 9.846619000  |
| C | 11.815232000 | 12.536668000 | 8.116993000  |
| H | 12.195709000 | 13.319613000 | 7.466592000  |
| C | 10.956906000 | 11.559436000 | 7.587540000  |
| H | 10.684645000 | 11.597569000 | 6.536549000  |
| C | 10.447739000 | 10.542170000 | 8.389712000  |
| H | 9.782917000  | 9.786731000  | 7.980715000  |
| C | 10.822886000 | 10.533787000 | 9.734332000  |
| C | 9.593086000  | 8.514542000  | 10.523184000 |
| H | 9.749166000  | 7.807481000  | 11.338968000 |
| H | 9.894674000  | 8.015142000  | 9.595664000  |
| C | 8.123114000  | 8.946127000  | 10.395771000 |
| H | 7.689677000  | 9.091659000  | 11.405688000 |
| H | 8.096150000  | 9.922713000  | 9.898906000  |
| C | 12.618828000 | 11.793761000 | 12.659546000 |
| H | 13.209907000 | 12.658851000 | 12.337148000 |
| C | 13.547283000 | 12.184240000 | 14.772053000 |
| C | 13.062239000 | 13.344140000 | 15.419852000 |
| C | 13.919789000 | 14.034432000 | 16.284119000 |
| H | 13.561680000 | 14.930738000 | 16.782469000 |

|   |              |              |              |
|---|--------------|--------------|--------------|
| C | 15.221139000 | 13.604033000 | 16.509289000 |
| H | 15.871894000 | 14.156321000 | 17.182263000 |
| C | 15.691564000 | 12.472962000 | 15.851494000 |
| H | 16.716582000 | 12.151429000 | 16.011450000 |
| C | 14.878012000 | 11.748605000 | 14.975415000 |
| C | 11.668573000 | 13.890133000 | 15.150060000 |
| H | 11.063271000 | 13.069896000 | 14.750695000 |
| C | 11.709933000 | 14.996875000 | 14.083404000 |
| H | 12.320799000 | 15.840702000 | 14.424324000 |
| H | 10.701172000 | 15.370575000 | 13.875084000 |
| H | 12.135943000 | 14.639224000 | 13.141667000 |
| C | 10.970267000 | 14.408797000 | 16.412699000 |
| H | 10.995172000 | 13.668780000 | 17.217810000 |
| H | 9.923824000  | 14.643257000 | 16.189439000 |
| H | 11.431062000 | 15.329397000 | 16.788011000 |
| C | 15.458245000 | 10.580266000 | 14.195016000 |
| H | 14.622151000 | 9.942404000  | 13.888444000 |
| C | 16.422371000 | 9.711809000  | 15.009070000 |
| H | 17.351234000 | 10.241424000 | 15.249183000 |
| H | 16.701147000 | 8.824509000  | 14.432196000 |
| H | 15.969770000 | 9.372632000  | 15.944053000 |
| C | 16.152317000 | 11.096013000 | 12.923284000 |
| H | 15.459835000 | 11.640284000 | 12.274054000 |
| H | 16.575241000 | 10.266579000 | 12.346059000 |
| H | 16.970659000 | 11.778037000 | 13.181144000 |
| C | 12.838145000 | 8.609267000  | 16.099787000 |
| C | 13.289367000 | 7.320932000  | 15.720464000 |
| C | 14.226736000 | 6.817654000  | 16.696128000 |
| C | 14.990265000 | 5.652060000  | 16.842433000 |
| H | 14.921587000 | 4.844784000  | 16.117699000 |
| C | 15.847661000 | 5.539745000  | 17.930707000 |
| H | 16.443873000 | 4.639728000  | 18.053956000 |
| C | 15.960443000 | 6.575118000  | 18.872650000 |
| H | 16.644591000 | 6.466764000  | 19.709556000 |
| C | 15.208077000 | 7.739286000  | 18.751749000 |
| H | 15.305065000 | 8.537360000  | 19.481245000 |
| C | 14.337828000 | 7.839977000  | 17.663889000 |
| C | 13.370366000 | 10.097456000 | 18.064804000 |
| H | 12.852391000 | 10.842948000 | 17.462259000 |
| H | 14.380353000 | 10.478369000 | 18.251665000 |
| C | 12.606837000 | 9.871517000  | 19.377557000 |
| H | 11.706933000 | 9.291078000  | 19.144057000 |
| H | 13.208378000 | 9.242829000  | 20.061887000 |
| C | 12.939090000 | 6.694150000  | 14.500568000 |

|    |              |             |              |
|----|--------------|-------------|--------------|
| H  | 13.399735000 | 5.721758000 | 14.289258000 |
| C  | 11.977073000 | 6.453270000 | 12.397681000 |
| C  | 12.731439000 | 6.818389000 | 11.254856000 |
| C  | 12.519947000 | 6.125317000 | 10.060738000 |
| H  | 13.087579000 | 6.402983000 | 9.177902000  |
| C  | 11.611029000 | 5.074975000 | 9.983262000  |
| H  | 11.460772000 | 4.548265000 | 9.044643000  |
| C  | 10.925268000 | 4.683801000 | 11.124299000 |
| H  | 10.252424000 | 3.831637000 | 11.075657000 |
| C  | 11.095280000 | 5.348885000 | 12.346033000 |
| C  | 13.835750000 | 7.858800000 | 11.343961000 |
| H  | 13.542733000 | 8.581363000 | 12.113582000 |
| C  | 15.145794000 | 7.187923000 | 11.791804000 |
| H  | 15.047983000 | 6.704693000 | 12.767874000 |
| H  | 15.953409000 | 7.924719000 | 11.861243000 |
| H  | 15.450373000 | 6.422439000 | 11.068814000 |
| C  | 14.069121000 | 8.635476000 | 10.045391000 |
| H  | 14.523193000 | 8.008031000 | 9.269732000  |
| H  | 14.759886000 | 9.464361000 | 10.228394000 |
| H  | 13.141847000 | 9.055206000 | 9.648257000  |
| C  | 10.388011000 | 4.797057000 | 13.574811000 |
| H  | 10.533925000 | 5.503677000 | 14.396998000 |
| C  | 8.877923000  | 4.632418000 | 13.369330000 |
| H  | 8.401613000  | 5.584960000 | 13.119693000 |
| H  | 8.411825000  | 4.250382000 | 14.283326000 |
| H  | 8.650366000  | 3.920395000 | 12.568779000 |
| C  | 11.016856000 | 3.461257000 | 14.004744000 |
| H  | 10.893979000 | 2.699372000 | 13.226872000 |
| H  | 10.543225000 | 3.087131000 | 14.919187000 |
| H  | 12.089271000 | 3.564099000 | 14.196683000 |
| C  | 9.147476000  | 8.134072000 | 15.388111000 |
| H  | 8.369066000  | 8.540485000 | 14.722657000 |
| H  | 9.641054000  | 7.314381000 | 14.838387000 |
| Si | 8.294612000  | 7.265100000 | 16.832083000 |
| C  | 7.698576000  | 8.473351000 | 18.176462000 |
| H  | 8.526061000  | 9.002441000 | 18.658275000 |
| H  | 7.156137000  | 7.924113000 | 18.954365000 |
| H  | 7.015098000  | 9.218847000 | 17.757111000 |
| C  | 6.729398000  | 6.338602000 | 16.267290000 |
| H  | 6.003575000  | 7.041157000 | 15.841910000 |
| H  | 6.246509000  | 5.831859000 | 17.110702000 |
| H  | 6.948739000  | 5.586985000 | 15.503753000 |
| C  | 9.505118000  | 6.039789000 | 17.631295000 |
| H  | 9.778439000  | 5.240513000 | 16.934459000 |

|   |              |              |              |
|---|--------------|--------------|--------------|
| H | 9.070462000  | 5.572410000  | 18.521576000 |
| H | 10.429541000 | 6.545836000  | 17.928404000 |
| N | 7.338913000  | 8.024995000  | 9.589091000  |
| C | 6.030737000  | 8.590103000  | 9.271164000  |
| H | 6.184738000  | 9.577454000  | 8.819556000  |
| H | 5.427956000  | 8.747629000  | 10.191020000 |
| C | 5.256057000  | 7.690561000  | 8.311956000  |
| H | 5.800674000  | 7.639963000  | 7.360606000  |
| H | 4.276828000  | 8.137604000  | 8.103684000  |
| C | 5.102217000  | 6.285494000  | 8.893450000  |
| H | 4.454266000  | 6.329224000  | 9.780538000  |
| H | 4.609959000  | 5.618714000  | 8.175952000  |
| C | 6.470493000  | 5.736229000  | 9.294683000  |
| H | 7.080733000  | 5.574988000  | 8.396994000  |
| H | 6.371063000  | 4.768016000  | 9.799127000  |
| C | 7.203803000  | 6.711476000  | 10.213209000 |
| H | 6.659533000  | 6.787266000  | 11.179408000 |
| H | 8.200842000  | 6.319944000  | 10.438153000 |
| C | 6.883762000  | 12.894018000 | 14.075215000 |
| C | 7.365372000  | 12.529618000 | 15.314083000 |
| C | 8.505810000  | 11.686288000 | 15.400202000 |
| N | 9.130688000  | 11.228964000 | 14.278220000 |
| C | 8.626316000  | 11.609577000 | 13.087632000 |
| C | 7.525363000  | 12.430490000 | 12.921648000 |
| H | 6.011146000  | 13.538268000 | 14.004434000 |
| H | 6.876671000  | 12.876305000 | 16.215445000 |
| H | 9.158248000  | 11.232112000 | 12.223644000 |
| H | 7.187618000  | 12.697149000 | 11.926909000 |
| N | 9.024982000  | 11.325114000 | 16.596922000 |
| C | 8.532199000  | 11.938483000 | 17.815786000 |
| H | 7.500490000  | 11.638455000 | 18.036921000 |
| H | 9.165139000  | 11.616395000 | 18.641698000 |
| H | 8.574424000  | 13.034782000 | 17.767775000 |
| C | 10.225816000 | 10.510442000 | 16.615140000 |
| H | 10.385579000 | 10.151839000 | 17.631388000 |
| H | 11.106012000 | 11.143379000 | 16.383824000 |
| H | 9.796126000  | 9.291150000  | 16.042532000 |

**A2**

|   |              |             |              |
|---|--------------|-------------|--------------|
| Y | 0.578554000  | 0.621374000 | -0.182284000 |
| N | -0.191958000 | 0.384346000 | -3.830025000 |
| N | 2.035872000  | 2.534818000 | -0.910135000 |
| N | 2.947067000  | 0.531732000 | 2.692582000  |
| N | 1.560655000  | 3.174265000 | 4.988779000  |



|   |              |              |              |
|---|--------------|--------------|--------------|
| C | 0.389461000  | 3.146514000  | 5.863559000  |
| H | 0.573462000  | 2.509725000  | 6.754597000  |
| H | -0.438799000 | 2.688404000  | 5.311048000  |
| C | -0.001343000 | 4.548846000  | 6.321330000  |
| H | -0.302405000 | 5.134879000  | 5.443922000  |
| H | -0.872209000 | 4.484381000  | 6.984439000  |
| C | 1.168513000  | 5.237512000  | 7.023397000  |
| H | 1.383646000  | 4.716209000  | 7.967102000  |
| H | 0.912344000  | 6.270746000  | 7.285110000  |
| C | 2.407133000  | 5.194722000  | 6.129756000  |
| H | 2.243523000  | 5.816380000  | 5.240709000  |
| H | 3.281661000  | 5.598927000  | 6.653133000  |
| C | 2.705460000  | 3.766949000  | 5.678435000  |
| H | 3.564051000  | 3.773926000  | 5.000191000  |
| H | 2.992704000  | 3.155286000  | 6.560376000  |
| N | 1.322833000  | -1.740331000 | -0.483342000 |
| C | 0.413897000  | 0.832633000  | -2.693390000 |
| C | 1.264585000  | 1.892435000  | -3.109666000 |
| C | 1.157982000  | 2.063845000  | -4.542596000 |
| C | 1.736408000  | 2.908462000  | -5.498310000 |
| H | 2.459688000  | 3.666970000  | -5.209243000 |
| C | 1.374328000  | 2.764288000  | -6.833799000 |
| H | 1.818900000  | 3.414317000  | -7.582523000 |
| C | 0.443312000  | 1.792112000  | -7.231887000 |
| H | 0.178852000  | 1.700802000  | -8.281593000 |
| C | -0.148291000 | 0.942427000  | -6.300951000 |
| H | -0.870527000 | 0.192777000  | -6.611042000 |
| C | 0.220738000  | 1.093430000  | -4.963665000 |
| C | -1.212134000 | -0.648357000 | -3.894526000 |
| H | -1.101288000 | -1.268768000 | -3.003915000 |
| H | -1.024542000 | -1.285896000 | -4.765355000 |
| C | -2.618940000 | -0.043380000 | -4.014287000 |
| H | -2.920393000 | 0.377266000  | -3.034751000 |
| H | -2.562922000 | 0.799553000  | -4.712040000 |
| C | 2.057035000  | 2.656740000  | -2.217191000 |
| H | 2.727082000  | 3.406124000  | -2.654427000 |
| C | 2.969573000  | 3.329152000  | -0.175157000 |
| C | 2.497122000  | 4.450683000  | 0.546417000  |
| C | 3.415082000  | 5.220765000  | 1.265035000  |
| H | 3.065300000  | 6.090705000  | 1.812941000  |
| C | 4.767760000  | 4.898453000  | 1.285280000  |
| H | 5.468352000  | 5.512190000  | 1.845439000  |
| C | 5.217490000  | 3.788977000  | 0.581230000  |
| H | 6.275069000  | 3.539025000  | 0.598520000  |

|   |              |              |              |
|---|--------------|--------------|--------------|
| C | 4.340933000  | 2.983558000  | -0.155053000 |
| C | 1.033372000  | 4.855560000  | 0.492698000  |
| H | 0.455264000  | 3.954390000  | 0.261912000  |
| C | 0.792253000  | 5.853437000  | -0.651166000 |
| H | 1.357819000  | 6.777041000  | -0.482857000 |
| H | -0.269978000 | 6.111811000  | -0.721617000 |
| H | 1.105947000  | 5.443437000  | -1.616394000 |
| C | 0.501534000  | 5.415081000  | 1.817104000  |
| H | 0.732480000  | 4.756299000  | 2.660843000  |
| H | -0.585814000 | 5.533776000  | 1.759043000  |
| H | 0.918020000  | 6.404735000  | 2.037930000  |
| C | 4.899821000  | 1.786248000  | -0.911075000 |
| H | 4.054125000  | 1.190475000  | -1.267899000 |
| C | 5.749154000  | 0.873635000  | -0.016375000 |
| H | 6.660458000  | 1.374287000  | 0.328645000  |
| H | 6.059593000  | -0.016361000 | -0.574111000 |
| H | 5.189363000  | 0.543098000  | 0.861875000  |
| C | 5.706688000  | 2.234606000  | -2.139894000 |
| H | 5.102367000  | 2.833200000  | -2.828634000 |
| H | 6.086557000  | 1.366653000  | -2.690156000 |
| H | 6.567145000  | 2.844422000  | -1.841951000 |
| C | 2.286957000  | 0.070620000  | 1.590843000  |
| C | 2.673028000  | -1.287999000 | 1.459242000  |
| C | 3.599288000  | -1.634408000 | 2.513814000  |
| C | 4.313650000  | -2.780104000 | 2.886233000  |
| H | 4.219819000  | -3.704386000 | 2.321481000  |
| C | 5.153863000  | -2.721929000 | 3.993049000  |
| H | 5.712198000  | -3.605736000 | 4.289565000  |
| C | 5.295273000  | -1.537819000 | 4.733873000  |
| H | 5.960661000  | -1.518524000 | 5.592434000  |
| C | 4.594194000  | -0.386884000 | 4.385605000  |
| H | 4.706086000  | 0.526395000  | 4.962573000  |
| C | 3.750616000  | -0.453355000 | 3.276368000  |
| C | 2.789401000  | 1.858970000  | 3.261253000  |
| H | 2.380253000  | 2.509998000  | 2.488014000  |
| H | 3.780793000  | 2.245950000  | 3.518471000  |
| C | 1.851531000  | 1.842676000  | 4.474314000  |
| H | 0.908098000  | 1.391636000  | 4.147393000  |
| H | 2.262574000  | 1.177682000  | 5.258729000  |
| C | 2.172879000  | -2.129309000 | 0.438147000  |
| H | 2.512509000  | -3.171491000 | 0.422987000  |
| C | 0.906513000  | -2.711876000 | -1.444343000 |
| C | 1.595586000  | -2.810811000 | -2.676711000 |
| C | 1.141975000  | -3.737687000 | -3.619083000 |

|    |              |              |              |
|----|--------------|--------------|--------------|
| H  | 1.661194000  | -3.827170000 | -4.568642000 |
| C  | 0.044256000  | -4.553755000 | -3.363661000 |
| H  | -0.289700000 | -5.269133000 | -4.110494000 |
| C  | -0.611810000 | -4.458479000 | -2.143110000 |
| H  | -1.455361000 | -5.112393000 | -1.935826000 |
| C  | -0.199250000 | -3.545655000 | -1.164825000 |
| C  | 2.842258000  | -1.983206000 | -2.948881000 |
| H  | 2.766424000  | -1.074824000 | -2.340239000 |
| C  | 4.101646000  | -2.744319000 | -2.502231000 |
| H  | 4.073185000  | -2.994090000 | -1.437810000 |
| H  | 4.999916000  | -2.143307000 | -2.682432000 |
| H  | 4.204634000  | -3.681059000 | -3.061868000 |
| C  | 2.985487000  | -1.544284000 | -4.409601000 |
| H  | 3.192890000  | -2.390575000 | -5.074407000 |
| H  | 3.824937000  | -0.848533000 | -4.507984000 |
| H  | 2.087490000  | -1.036861000 | -4.770568000 |
| C  | -0.915326000 | -3.515395000 | 0.177009000  |
| H  | -0.511700000 | -2.674653000 | 0.747918000  |
| C  | -2.424970000 | -3.286115000 | 0.033723000  |
| H  | -2.638459000 | -2.353163000 | -0.496534000 |
| H  | -2.895888000 | -3.226693000 | 1.021216000  |
| H  | -2.911771000 | -4.102068000 | -0.511886000 |
| C  | -0.632118000 | -4.795149000 | 0.978332000  |
| H  | -1.015083000 | -5.681203000 | 0.459411000  |
| H  | -1.111195000 | -4.749048000 | 1.962670000  |
| H  | 0.441731000  | -4.941218000 | 1.131465000  |
| C  | -6.318215000 | -4.961884000 | 3.221556000  |
| H  | -6.058191000 | -4.250910000 | 4.013090000  |
| H  | -7.141618000 | -4.530195000 | 2.642620000  |
| Si | -6.801962000 | -6.646595000 | 3.950359000  |
| C  | -5.340655000 | -7.351476000 | 4.934381000  |
| H  | -4.462205000 | -7.490354000 | 4.295288000  |
| H  | -5.590924000 | -8.323225000 | 5.373093000  |
| H  | -5.055606000 | -6.680377000 | 5.751543000  |
| C  | -8.292959000 | -6.426389000 | 5.103616000  |
| H  | -8.056025000 | -5.744521000 | 5.927246000  |
| H  | -8.601141000 | -7.382321000 | 5.540208000  |
| H  | -9.152521000 | -6.013162000 | 4.565168000  |
| C  | -7.256644000 | -7.838022000 | 2.545591000  |
| H  | -8.102287000 | -7.457613000 | 1.962915000  |
| H  | -7.537007000 | -8.821498000 | 2.937390000  |
| H  | -6.414922000 | -7.979634000 | 1.859474000  |
| N  | -3.594266000 | -0.985748000 | -4.538633000 |
| C  | -4.812233000 | -0.302890000 | -4.964963000 |

|   |              |              |              |
|---|--------------|--------------|--------------|
| H | -4.531653000 | 0.497411000  | -5.659736000 |
| H | -5.323121000 | 0.182436000  | -4.105969000 |
| C | -5.780340000 | -1.267999000 | -5.643621000 |
| H | -5.311013000 | -1.650404000 | -6.558911000 |
| H | -6.685652000 | -0.726544000 | -5.942675000 |
| C | -6.122263000 | -2.433309000 | -4.715733000 |
| H | -6.695981000 | -2.056413000 | -3.856850000 |
| H | -6.761289000 | -3.163459000 | -5.225987000 |
| C | -4.837507000 | -3.091626000 | -4.215011000 |
| H | -4.320847000 | -3.576256000 | -5.053185000 |
| H | -5.058834000 | -3.869847000 | -3.475171000 |
| C | -3.898797000 | -2.058172000 | -3.595710000 |
| H | -4.360355000 | -1.650367000 | -2.670293000 |
| H | -2.965552000 | -2.546062000 | -3.297516000 |
| C | -3.769801000 | 3.641021000  | -0.533196000 |
| C | -3.664412000 | 2.680914000  | 0.448291000  |
| C | -2.493278000 | 1.872034000  | 0.518534000  |
| N | -1.466345000 | 2.077973000  | -0.356349000 |
| C | -1.610520000 | 3.021051000  | -1.309065000 |
| C | -2.725375000 | 3.823881000  | -1.451181000 |
| H | -4.664802000 | 4.255828000  | -0.587334000 |
| H | -4.464193000 | 2.545661000  | 1.164977000  |
| H | -0.769119000 | 3.118820000  | -1.988548000 |
| H | -2.774273000 | 4.565056000  | -2.240421000 |
| N | -2.352374000 | 0.886871000  | 1.430412000  |
| C | -3.393121000 | 0.671840000  | 2.419008000  |
| H | -4.375093000 | 0.522990000  | 1.953087000  |
| H | -3.144524000 | -0.231816000 | 2.975796000  |
| H | -3.472952000 | 1.503748000  | 3.135864000  |
| C | -1.062980000 | 0.218518000  | 1.582580000  |
| H | -1.258366000 | -0.847991000 | 1.768252000  |
| H | -0.589151000 | 0.590128000  | 2.511229000  |
| H | -5.453233000 | -5.052182000 | 2.555901000  |

### A3

|   |              |              |              |
|---|--------------|--------------|--------------|
| Y | -0.033502000 | -0.072994000 | 0.129472000  |
| N | -1.114015000 | 0.229988000  | -3.434808000 |
| N | 0.951112000  | 2.200230000  | -0.283234000 |
| N | 2.596931000  | -0.210669000 | 2.763951000  |
| N | 0.993008000  | 1.618583000  | 5.638644000  |
| C | -0.080014000 | 1.205355000  | 6.541569000  |
| H | 0.277456000  | 0.437002000  | 7.259456000  |
| H | -0.869132000 | 0.737340000  | 5.942075000  |
| C | -0.647751000 | 2.390219000  | 7.317346000  |

|   |              |              |              |
|---|--------------|--------------|--------------|
| H | -1.111003000 | 3.086905000  | 6.607455000  |
| H | -1.438180000 | 2.037799000  | 7.990661000  |
| C | 0.453378000  | 3.107613000  | 8.097622000  |
| H | 0.827566000  | 2.444705000  | 8.890860000  |
| H | 0.059722000  | 4.002218000  | 8.593972000  |
| C | 1.602910000  | 3.469201000  | 7.158066000  |
| H | 1.268757000  | 4.228036000  | 6.439584000  |
| H | 2.444101000  | 3.897597000  | 7.715726000  |
| C | 2.083593000  | 2.243016000  | 6.385489000  |
| H | 2.868282000  | 2.542320000  | 5.684009000  |
| H | 2.539770000  | 1.518024000  | 7.093151000  |
| N | 1.093110000  | -2.142117000 | -0.686141000 |
| C | -0.487236000 | 0.570693000  | -2.272264000 |
| C | 0.093078000  | 1.845155000  | -2.514091000 |
| C | -0.197816000 | 2.260503000  | -3.869290000 |
| C | 0.099161000  | 3.375248000  | -4.663332000 |
| H | 0.690219000  | 4.199200000  | -4.271201000 |
| C | -0.372647000 | 3.416857000  | -5.971425000 |
| H | -0.146643000 | 4.277351000  | -6.595328000 |
| C | -1.136250000 | 2.364624000  | -6.500857000 |
| H | -1.491283000 | 2.422594000  | -7.525922000 |
| C | -1.446735000 | 1.246497000  | -5.731501000 |
| H | -2.039409000 | 0.434503000  | -6.142715000 |
| C | -0.970139000 | 1.212938000  | -4.420426000 |
| C | -1.917100000 | -0.962631000 | -3.644729000 |
| H | -1.588279000 | -1.706102000 | -2.917098000 |
| H | -1.711046000 | -1.365201000 | -4.642446000 |
| C | -3.418633000 | -0.659051000 | -3.532766000 |
| H | -3.681123000 | -0.499915000 | -2.468353000 |
| H | -3.608504000 | 0.290398000  | -4.045872000 |
| C | 0.810995000  | 2.574369000  | -1.533677000 |
| H | 1.272212000  | 3.519172000  | -1.844155000 |
| C | 1.778970000  | 3.018607000  | 0.546059000  |
| C | 1.168790000  | 3.858637000  | 1.507023000  |
| C | 1.984071000  | 4.651160000  | 2.319059000  |
| H | 1.525941000  | 5.307631000  | 3.052733000  |
| C | 3.369307000  | 4.618117000  | 2.200985000  |
| H | 3.987984000  | 5.245037000  | 2.837775000  |
| C | 3.956692000  | 3.781210000  | 1.260944000  |
| H | 5.039501000  | 3.757420000  | 1.170939000  |
| C | 3.186916000  | 2.967078000  | 0.422029000  |
| C | -0.344024000 | 3.949234000  | 1.616871000  |
| H | -0.753436000 | 3.003227000  | 1.246206000  |
| C | -0.884985000 | 5.063241000  | 0.706911000  |

|   |              |              |              |
|---|--------------|--------------|--------------|
| H | -0.498240000 | 6.039597000  | 1.020655000  |
| H | -1.979009000 | 5.100051000  | 0.748574000  |
| H | -0.590723000 | 4.908640000  | -0.335886000 |
| C | -0.845987000 | 4.134339000  | 3.053332000  |
| H | -0.404962000 | 3.400928000  | 3.736386000  |
| H | -1.935328000 | 4.023650000  | 3.082505000  |
| H | -0.617124000 | 5.134398000  | 3.439591000  |
| C | 3.889998000  | 2.081424000  | -0.597166000 |
| H | 3.146656000  | 1.393150000  | -1.011493000 |
| C | 4.996294000  | 1.223336000  | 0.030731000  |
| H | 5.821853000  | 1.834505000  | 0.411826000  |
| H | 5.416334000  | 0.545036000  | -0.719663000 |
| H | 4.612555000  | 0.617974000  | 0.855437000  |
| C | 4.453233000  | 2.915547000  | -1.758526000 |
| H | 3.671309000  | 3.489406000  | -2.265578000 |
| H | 4.933391000  | 2.269320000  | -2.501676000 |
| H | 5.204407000  | 3.628593000  | -1.399950000 |
| C | 1.923567000  | -0.582557000 | 1.636483000  |
| C | 2.538201000  | -1.787342000 | 1.208670000  |
| C | 3.616016000  | -2.129972000 | 2.109362000  |
| C | 4.563676000  | -3.157590000 | 2.196763000  |
| H | 4.585715000  | -3.959881000 | 1.463396000  |
| C | 5.485544000  | -3.139082000 | 3.238123000  |
| H | 6.224670000  | -3.932004000 | 3.313919000  |
| C | 5.478663000  | -2.110828000 | 4.193984000  |
| H | 6.211283000  | -2.119358000 | 4.996106000  |
| C | 4.545701000  | -1.079899000 | 4.130181000  |
| H | 4.542953000  | -0.287870000 | 4.873242000  |
| C | 3.622983000  | -1.105827000 | 3.084117000  |
| C | 2.257734000  | 0.926745000  | 3.601562000  |
| H | 1.675959000  | 1.628132000  | 3.002583000  |
| H | 3.184862000  | 1.436174000  | 3.883966000  |
| C | 1.448693000  | 0.495217000  | 4.830694000  |
| H | 0.566134000  | -0.040531000 | 4.464453000  |
| H | 2.032379000  | -0.232667000 | 5.427436000  |
| C | 2.095302000  | -2.511309000 | 0.077427000  |
| H | 2.617448000  | -3.443282000 | -0.168802000 |
| C | 0.765727000  | -2.987894000 | -1.790065000 |
| C | 1.329496000  | -2.722077000 | -3.060745000 |
| C | 0.958327000  | -3.534129000 | -4.135770000 |
| H | 1.383452000  | -3.344527000 | -5.116945000 |
| C | 0.061527000  | -4.585661000 | -3.974127000 |
| H | -0.212096000 | -5.205446000 | -4.823866000 |
| C | -0.468172000 | -4.848306000 | -2.717068000 |

|   |              |              |              |
|---|--------------|--------------|--------------|
| H | -1.148437000 | -5.686593000 | -2.587414000 |
| C | -0.130221000 | -4.064925000 | -1.606879000 |
| C | 2.369963000  | -1.628625000 | -3.244770000 |
| H | 2.196377000  | -0.883572000 | -2.459905000 |
| C | 3.785968000  | -2.196155000 | -3.050129000 |
| H | 3.915027000  | -2.646311000 | -2.061673000 |
| H | 4.537228000  | -1.406247000 | -3.160622000 |
| H | 3.996897000  | -2.969393000 | -3.797802000 |
| C | 2.275409000  | -0.906561000 | -4.592510000 |
| H | 2.561136000  | -1.556788000 | -5.427218000 |
| H | 2.959413000  | -0.051880000 | -4.605892000 |
| H | 1.267036000  | -0.530085000 | -4.781277000 |
| C | -0.685490000 | -4.429539000 | -0.238410000 |
| H | -0.388022000 | -3.641697000 | 0.458981000  |
| C | -2.217432000 | -4.499208000 | -0.220851000 |
| H | -2.663866000 | -3.551282000 | -0.535865000 |
| H | -2.575969000 | -4.719611000 | 0.790716000  |
| H | -2.598131000 | -5.286616000 | -0.880752000 |
| C | -0.074401000 | -5.745846000 | 0.266397000  |
| H | -0.339625000 | -6.583741000 | -0.388306000 |
| H | -0.437118000 | -5.978924000 | 1.273693000  |
| H | 1.018090000  | -5.690467000 | 0.305029000  |
| N | -4.245348000 | -1.674867000 | -4.164598000 |
| C | -5.612847000 | -1.202010000 | -4.356857000 |
| H | -5.573799000 | -0.244541000 | -4.889578000 |
| H | -6.112264000 | -1.007406000 | -3.383773000 |
| C | -6.438916000 | -2.208884000 | -5.153105000 |
| H | -6.005956000 | -2.300951000 | -6.157282000 |
| H | -7.461017000 | -1.830168000 | -5.271912000 |
| C | -6.439133000 | -3.574377000 | -4.466158000 |
| H | -6.983603000 | -3.501071000 | -3.513692000 |
| H | -6.968502000 | -4.316551000 | -5.075106000 |
| C | -5.003146000 | -4.020462000 | -4.192779000 |
| H | -4.490781000 | -4.219469000 | -5.142626000 |
| H | -4.986749000 | -4.951072000 | -3.613257000 |
| C | -4.228990000 | -2.941322000 | -3.438987000 |
| H | -4.662917000 | -2.819182000 | -2.422759000 |
| H | -3.191627000 | -3.263516000 | -3.305845000 |
| C | -4.910570000 | 1.950975000  | 0.652723000  |
| C | -4.514401000 | 0.878417000  | 1.420348000  |
| C | -3.204532000 | 0.341184000  | 1.256865000  |
| N | -2.336752000 | 0.913337000  | 0.372704000  |
| C | -2.764453000 | 1.955776000  | -0.368026000 |
| C | -4.024991000 | 2.512913000  | -0.278114000 |

|   |              |              |              |
|---|--------------|--------------|--------------|
| H | -5.910733000 | 2.358491000  | 0.777434000  |
| H | -5.191931000 | 0.450389000  | 2.147807000  |
| H | -2.036398000 | 2.349210000  | -1.071249000 |
| H | -4.302330000 | 3.353267000  | -0.903844000 |
| N | -2.774360000 | -0.733119000 | 1.952122000  |
| C | -3.638902000 | -1.331278000 | 2.952877000  |
| H | -4.618617000 | -1.600370000 | 2.539295000  |
| H | -3.160413000 | -2.245084000 | 3.305522000  |
| H | -3.798871000 | -0.672235000 | 3.820399000  |
| C | -1.366567000 | -1.117390000 | 1.892013000  |
| H | -1.317889000 | -2.216277000 | 1.886788000  |
| H | -0.885057000 | -0.813195000 | 2.841112000  |

**TS(A3-A4)**

|   |              |              |              |
|---|--------------|--------------|--------------|
| Y | 0.139917000  | -0.133049000 | -0.028546000 |
| N | -1.059245000 | 0.169107000  | -3.586814000 |
| N | 0.857619000  | 2.203586000  | -0.422479000 |
| N | 2.400072000  | -0.577638000 | 2.859894000  |
| N | 2.732188000  | 2.337476000  | 5.232150000  |
| C | 1.811515000  | 3.092143000  | 6.076278000  |
| H | 1.460684000  | 2.483457000  | 6.937501000  |
| H | 0.926555000  | 3.341354000  | 5.480114000  |
| C | 2.459422000  | 4.371522000  | 6.599388000  |
| H | 2.685660000  | 5.021212000  | 5.744587000  |
| H | 1.746424000  | 4.906973000  | 7.237783000  |
| C | 3.746562000  | 4.060108000  | 7.362047000  |
| H | 3.498914000  | 3.511513000  | 8.282135000  |
| H | 4.249598000  | 4.983755000  | 7.671456000  |
| C | 4.668020000  | 3.201760000  | 6.496671000  |
| H | 5.019503000  | 3.786093000  | 5.637072000  |
| H | 5.553504000  | 2.886600000  | 7.061174000  |
| C | 3.930323000  | 1.968507000  | 5.980331000  |
| H | 4.594705000  | 1.392319000  | 5.328274000  |
| H | 3.673531000  | 1.309931000  | 6.838079000  |
| N | 0.648496000  | -2.340144000 | -0.552852000 |
| C | -0.484006000 | 0.554739000  | -2.410937000 |
| C | -0.012037000 | 1.875570000  | -2.643525000 |
| C | -0.305643000 | 2.269179000  | -4.003653000 |
| C | -0.083323000 | 3.402555000  | -4.795508000 |
| H | 0.426467000  | 4.275009000  | -4.394392000 |
| C | -0.523005000 | 3.396971000  | -6.115436000 |
| H | -0.354124000 | 4.270762000  | -6.739044000 |
| C | -1.181266000 | 2.281499000  | -6.658227000 |
| H | -1.512531000 | 2.307076000  | -7.692649000 |



|   |              |              |              |
|---|--------------|--------------|--------------|
| C | -1.417354000 | 1.143061000  | -5.892324000 |
| H | -1.936556000 | 0.279630000  | -6.300548000 |
| C | -0.969665000 | 1.159529000  | -4.570530000 |
| C | -1.711572000 | -1.103206000 | -3.851297000 |
| H | -1.476270000 | -1.764837000 | -3.017735000 |
| H | -1.265465000 | -1.538400000 | -4.752345000 |
| C | -3.233109000 | -0.954010000 | -4.072942000 |
| H | -3.781505000 | -1.349975000 | -3.195695000 |
| H | -3.470370000 | 0.113521000  | -4.135150000 |
| C | 0.633170000  | 2.635030000  | -1.645457000 |
| H | 0.965175000  | 3.647315000  | -1.902833000 |
| C | 1.533465000  | 3.102184000  | 0.457428000  |
| C | 0.772613000  | 3.837827000  | 1.395684000  |
| C | 1.439435000  | 4.719151000  | 2.249767000  |
| H | 0.869649000  | 5.302214000  | 2.967875000  |
| C | 2.820316000  | 4.874200000  | 2.188213000  |
| H | 3.321684000  | 5.564774000  | 2.860085000  |
| C | 3.554760000  | 4.143152000  | 1.263685000  |
| H | 4.633345000  | 4.270125000  | 1.218831000  |
| C | 2.937080000  | 3.245441000  | 0.386222000  |
| C | -0.745684000 | 3.741219000  | 1.418291000  |
| H | -1.020285000 | 2.794243000  | 0.936398000  |
| C | -1.371300000 | 4.866396000  | 0.578862000  |
| H | -1.117694000 | 5.847065000  | 0.996914000  |
| H | -2.463453000 | 4.777780000  | 0.558996000  |
| H | -1.010898000 | 4.841967000  | -0.453895000 |
| C | -1.342343000 | 3.725917000  | 2.829407000  |
| H | -0.898096000 | 2.938337000  | 3.446440000  |
| H | -2.422136000 | 3.548535000  | 2.779680000  |
| H | -1.197544000 | 4.679636000  | 3.348145000  |
| C | 3.786213000  | 2.474873000  | -0.615279000 |
| H | 3.129395000  | 1.777016000  | -1.143353000 |
| C | 4.876873000  | 1.639380000  | 0.068655000  |
| H | 5.584501000  | 2.268267000  | 0.619816000  |
| H | 5.449323000  | 1.079845000  | -0.679190000 |
| H | 4.444872000  | 0.919747000  | 0.769395000  |
| C | 4.395679000  | 3.415879000  | -1.665714000 |
| H | 3.622762000  | 3.976969000  | -2.200828000 |
| H | 4.973390000  | 2.848146000  | -2.403241000 |
| H | 5.070512000  | 4.144160000  | -1.202208000 |
| C | 1.512679000  | -0.867427000 | 1.793440000  |
| C | 1.653149000  | -2.336776000 | 1.627941000  |
| C | 2.410184000  | -2.864097000 | 2.749283000  |
| C | 2.777473000  | -4.144316000 | 3.163324000  |

|   |              |              |              |
|---|--------------|--------------|--------------|
| H | 2.431526000  | -5.020175000 | 2.619347000  |
| C | 3.605079000  | -4.294941000 | 4.280845000  |
| H | 3.893219000  | -5.290611000 | 4.607129000  |
| C | 4.065449000  | -3.176361000 | 4.976639000  |
| H | 4.708629000  | -3.306210000 | 5.843050000  |
| C | 3.704176000  | -1.882286000 | 4.581826000  |
| H | 4.066831000  | -1.020738000 | 5.133787000  |
| C | 2.870651000  | -1.738916000 | 3.474728000  |
| C | 2.787516000  | 0.737493000  | 3.320410000  |
| H | 2.576359000  | 1.459626000  | 2.529430000  |
| H | 3.875140000  | 0.743763000  | 3.471939000  |
| C | 2.088233000  | 1.182539000  | 4.619596000  |
| H | 1.056354000  | 1.460890000  | 4.378363000  |
| H | 2.026620000  | 0.326760000  | 5.319840000  |
| C | 1.256091000  | -2.982727000 | 0.487758000  |
| H | 1.461689000  | -4.050209000 | 0.375021000  |
| C | 0.507179000  | -3.092841000 | -1.747551000 |
| C | 1.346183000  | -2.795923000 | -2.854227000 |
| C | 1.199757000  | -3.529716000 | -4.033275000 |
| H | 1.841291000  | -3.311072000 | -4.882005000 |
| C | 0.259999000  | -4.551778000 | -4.138949000 |
| H | 0.170017000  | -5.119702000 | -5.061287000 |
| C | -0.551217000 | -4.845949000 | -3.050574000 |
| H | -1.278031000 | -5.651406000 | -3.129441000 |
| C | -0.450924000 | -4.131638000 | -1.850214000 |
| C | 2.445239000  | -1.751265000 | -2.736273000 |
| H | 2.099048000  | -0.999283000 | -2.014918000 |
| C | 3.721056000  | -2.379936000 | -2.153985000 |
| H | 3.534510000  | -2.818940000 | -1.170136000 |
| H | 4.510371000  | -1.627391000 | -2.044961000 |
| H | 4.095354000  | -3.169704000 | -2.815573000 |
| C | 2.749330000  | -1.013592000 | -4.042684000 |
| H | 3.225976000  | -1.667053000 | -4.781951000 |
| H | 3.445434000  | -0.189855000 | -3.852754000 |
| H | 1.843952000  | -0.593283000 | -4.490020000 |
| C | -1.370819000 | -4.500997000 | -0.695670000 |
| H | -1.192367000 | -3.779856000 | 0.107707000  |
| C | -2.852231000 | -4.402765000 | -1.084999000 |
| H | -3.104630000 | -3.400903000 | -1.445378000 |
| H | -3.490908000 | -4.619732000 | -0.221472000 |
| H | -3.112489000 | -5.117238000 | -1.873784000 |
| C | -1.053021000 | -5.900528000 | -0.147720000 |
| H | -1.217048000 | -6.671596000 | -0.909062000 |
| H | -1.695121000 | -6.138026000 | 0.708469000  |

|   |              |              |              |
|---|--------------|--------------|--------------|
| H | -0.011455000 | -5.977156000 | 0.178850000  |
| N | -3.683151000 | -1.576148000 | -5.310084000 |
| C | -5.016866000 | -1.116912000 | -5.686493000 |
| H | -5.006462000 | -0.020904000 | -5.713119000 |
| H | -5.773861000 | -1.415666000 | -4.930261000 |
| C | -5.425138000 | -1.669461000 | -7.049622000 |
| H | -4.743711000 | -1.266031000 | -7.809233000 |
| H | -6.433823000 | -1.318821000 | -7.297899000 |
| C | -5.359864000 | -3.196660000 | -7.060325000 |
| H | -6.132121000 | -3.598043000 | -6.388520000 |
| H | -5.579181000 | -3.587395000 | -8.060727000 |
| C | -3.985202000 | -3.664525000 | -6.583828000 |
| H | -3.220977000 | -3.374282000 | -7.315847000 |
| H | -3.952679000 | -4.756729000 | -6.495080000 |
| C | -3.635079000 | -3.035251000 | -5.237437000 |
| H | -4.336429000 | -3.410052000 | -4.461530000 |
| H | -2.631033000 | -3.344502000 | -4.928207000 |
| C | -4.705681000 | -1.578852000 | 1.046620000  |
| C | -3.686930000 | -1.879768000 | 1.924025000  |
| C | -2.402572000 | -1.318574000 | 1.711392000  |
| N | -2.166325000 | -0.519871000 | 0.631372000  |
| C | -3.187326000 | -0.241109000 | -0.209579000 |
| C | -4.465186000 | -0.734070000 | -0.050981000 |
| H | -5.698803000 | -1.984532000 | 1.218964000  |
| H | -3.873471000 | -2.498396000 | 2.793133000  |
| H | -2.929877000 | 0.399087000  | -1.049342000 |
| H | -5.246678000 | -0.474942000 | -0.755469000 |
| N | -1.366684000 | -1.506747000 | 2.561936000  |
| C | -1.415957000 | -2.519172000 | 3.600569000  |
| H | -1.921975000 | -3.417918000 | 3.240010000  |
| H | -0.391313000 | -2.798110000 | 3.853217000  |
| H | -1.922166000 | -2.157914000 | 4.507566000  |
| C | -0.240798000 | -0.595943000 | 2.566699000  |
| H | 0.176283000  | -0.610754000 | 3.569708000  |
| H | -0.619046000 | 0.432636000  | 2.398348000  |

#### A4

|   |              |              |              |
|---|--------------|--------------|--------------|
| Y | 0.353613000  | -0.180059000 | -0.192530000 |
| N | -1.041660000 | 0.401819000  | -3.616514000 |
| N | 1.441025000  | 2.015548000  | -0.599454000 |
| N | 1.403960000  | -0.571403000 | 3.329107000  |
| N | 0.298936000  | 1.588081000  | 6.224017000  |
| C | -0.423808000 | 1.269751000  | 7.452151000  |
| H | 0.236868000  | 0.772355000  | 8.193589000  |

|   |              |              |              |
|---|--------------|--------------|--------------|
| H | -1.219133000 | 0.554946000  | 7.208889000  |
| C | -1.025728000 | 2.524425000  | 8.079707000  |
| H | -1.766589000 | 2.942063000  | 7.385937000  |
| H | -1.555979000 | 2.254665000  | 9.000870000  |
| C | 0.058414000  | 3.564566000  | 8.360156000  |
| H | 0.727839000  | 3.186979000  | 9.146351000  |
| H | -0.382463000 | 4.493145000  | 8.741179000  |
| C | 0.869543000  | 3.827670000  | 7.091851000  |
| H | 0.237411000  | 4.324519000  | 6.345177000  |
| H | 1.714237000  | 4.495055000  | 7.299750000  |
| C | 1.390719000  | 2.520175000  | 6.499752000  |
| H | 1.926688000  | 2.725292000  | 5.568181000  |
| H | 2.125135000  | 2.068657000  | 7.200829000  |
| N | 0.524691000  | -2.350617000 | -0.717672000 |
| C | -0.376697000 | 0.702693000  | -2.462484000 |
| C | 0.380827000  | 1.867923000  | -2.757842000 |
| C | 0.147446000  | 2.266157000  | -4.128481000 |
| C | 0.600467000  | 3.291189000  | -4.968231000 |
| H | 1.301437000  | 4.040176000  | -4.608274000 |
| C | 0.141671000  | 3.339854000  | -6.280593000 |
| H | 0.486281000  | 4.132422000  | -6.939215000 |
| C | -0.757012000 | 2.379686000  | -6.771609000 |
| H | -1.095210000 | 2.439421000  | -7.802214000 |
| C | -1.221149000 | 1.349707000  | -5.957899000 |
| H | -1.915347000 | 0.606391000  | -6.339241000 |
| C | -0.759442000 | 1.311420000  | -4.641769000 |
| C | -1.953924000 | -0.714246000 | -3.801620000 |
| H | -1.735327000 | -1.440877000 | -3.017439000 |
| H | -1.740697000 | -1.191152000 | -4.765268000 |
| C | -3.423107000 | -0.263880000 | -3.792353000 |
| H | -3.749774000 | -0.093823000 | -2.746340000 |
| H | -3.482902000 | 0.704654000  | -4.301706000 |
| C | 1.220238000  | 2.490643000  | -1.805133000 |
| H | 1.709347000  | 3.429741000  | -2.087631000 |
| C | 2.246989000  | 2.804623000  | 0.281346000  |
| C | 1.605761000  | 3.663747000  | 1.204820000  |
| C | 2.399127000  | 4.412693000  | 2.077373000  |
| H | 1.924564000  | 5.081263000  | 2.789481000  |
| C | 3.787339000  | 4.324647000  | 2.045026000  |
| H | 4.387703000  | 4.916887000  | 2.730469000  |
| C | 4.402339000  | 3.481641000  | 1.128980000  |
| H | 5.486795000  | 3.422064000  | 1.103062000  |
| C | 3.654463000  | 2.706302000  | 0.235805000  |
| C | 0.092607000  | 3.824048000  | 1.203962000  |

|   |              |              |              |
|---|--------------|--------------|--------------|
| H | -0.334748000 | 2.876124000  | 0.853551000  |
| C | -0.339403000 | 4.916944000  | 0.212135000  |
| H | 0.087098000  | 5.884595000  | 0.499689000  |
| H | -1.430570000 | 5.017671000  | 0.199234000  |
| H | -0.010810000 | 4.697903000  | -0.807559000 |
| C | -0.505620000 | 4.112138000  | 2.584905000  |
| H | -0.175817000 | 3.390015000  | 3.336720000  |
| H | -1.598379000 | 4.068375000  | 2.530351000  |
| H | -0.244842000 | 5.115351000  | 2.940556000  |
| C | 4.369912000  | 1.829039000  | -0.780523000 |
| H | 3.628039000  | 1.146056000  | -1.209187000 |
| C | 5.475709000  | 0.970407000  | -0.155309000 |
| H | 6.304589000  | 1.581570000  | 0.218377000  |
| H | 5.892295000  | 0.291405000  | -0.907543000 |
| H | 5.099201000  | 0.368230000  | 0.675491000  |
| C | 4.932021000  | 2.676737000  | -1.932907000 |
| H | 4.147401000  | 3.248684000  | -2.438175000 |
| H | 5.420672000  | 2.040719000  | -2.679390000 |
| H | 5.674911000  | 3.392385000  | -1.562697000 |
| C | 0.729487000  | -0.991084000 | 2.099438000  |
| C | 1.753105000  | -1.759789000 | 1.337018000  |
| C | 3.009355000  | -1.644620000 | 2.081495000  |
| C | 4.293852000  | -2.124671000 | 1.835012000  |
| H | 4.502898000  | -2.713129000 | 0.945247000  |
| C | 5.323992000  | -1.826340000 | 2.730184000  |
| H | 6.327401000  | -2.198658000 | 2.545341000  |
| C | 5.068255000  | -1.028825000 | 3.848577000  |
| H | 5.879264000  | -0.780530000 | 4.528450000  |
| C | 3.786782000  | -0.546183000 | 4.117026000  |
| H | 3.608587000  | 0.067632000  | 4.993913000  |
| C | 2.746229000  | -0.892204000 | 3.247284000  |
| C | 0.984152000  | 0.625192000  | 4.039035000  |
| H | 0.042137000  | 0.961800000  | 3.601440000  |
| H | 1.718489000  | 1.429795000  | 3.879709000  |
| C | 0.760057000  | 0.386876000  | 5.537402000  |
| H | -0.008406000 | -0.385561000 | 5.641340000  |
| H | 1.671217000  | -0.031042000 | 6.004455000  |
| C | 1.645054000  | -2.390987000 | 0.098938000  |
| H | 2.534950000  | -2.903009000 | -0.272924000 |
| C | 0.432039000  | -3.246543000 | -1.809552000 |
| C | 1.297049000  | -3.168557000 | -2.930584000 |
| C | 1.115306000  | -4.067075000 | -3.988991000 |
| H | 1.778639000  | -4.010811000 | -4.848837000 |
| C | 0.104908000  | -5.018191000 | -3.972882000 |

|   |              |              |              |
|---|--------------|--------------|--------------|
| H | -0.020428000 | -5.700664000 | -4.809310000 |
| C | -0.743497000 | -5.091511000 | -2.872249000 |
| H | -1.527413000 | -5.843045000 | -2.855799000 |
| C | -0.593950000 | -4.229873000 | -1.783825000 |
| C | 2.420874000  | -2.148489000 | -3.039524000 |
| H | 2.338755000  | -1.467203000 | -2.183707000 |
| C | 3.799871000  | -2.821937000 | -2.962611000 |
| H | 3.912158000  | -3.417240000 | -2.051020000 |
| H | 4.599859000  | -2.073322000 | -2.983112000 |
| H | 3.953018000  | -3.496002000 | -3.812932000 |
| C | 2.316667000  | -1.292369000 | -4.309174000 |
| H | 2.446652000  | -1.896241000 | -5.213777000 |
| H | 3.097117000  | -0.523625000 | -4.315276000 |
| H | 1.348255000  | -0.790639000 | -4.373753000 |
| C | -1.470680000 | -4.380983000 | -0.550800000 |
| H | -1.634654000 | -3.370776000 | -0.158204000 |
| C | -2.844889000 | -5.000000000 | -0.819633000 |
| H | -3.380897000 | -4.473942000 | -1.615730000 |
| H | -3.458119000 | -4.953358000 | 0.086933000  |
| H | -2.774284000 | -6.056892000 | -1.101181000 |
| C | -0.729725000 | -5.183513000 | 0.531153000  |
| H | -0.521816000 | -6.199790000 | 0.177079000  |
| H | -1.333032000 | -5.261162000 | 1.443765000  |
| H | 0.223080000  | -4.714195000 | 0.790439000  |
| N | -4.295507000 | -1.186522000 | -4.498967000 |
| C | -5.613749000 | -0.600603000 | -4.721582000 |
| H | -5.478702000 | 0.371487000  | -5.210616000 |
| H | -6.135070000 | -0.406615000 | -3.759663000 |
| C | -6.482867000 | -1.506733000 | -5.589357000 |
| H | -6.019146000 | -1.593319000 | -6.580129000 |
| H | -7.466850000 | -1.043690000 | -5.729001000 |
| C | -6.615763000 | -2.893193000 | -4.960119000 |
| H | -7.187734000 | -2.813562000 | -4.024415000 |
| H | -7.178663000 | -3.566543000 | -5.616938000 |
| C | -5.230206000 | -3.462412000 | -4.658422000 |
| H | -4.699583000 | -3.660650000 | -5.598217000 |
| H | -5.306261000 | -4.415090000 | -4.121455000 |
| C | -4.402993000 | -2.480738000 | -3.831017000 |
| H | -4.861271000 | -2.368723000 | -2.824392000 |
| H | -3.398515000 | -2.888938000 | -3.680632000 |
| C | -4.279115000 | 1.354622000  | 1.672577000  |
| C | -3.580752000 | 0.497251000  | 2.495309000  |
| C | -2.379694000 | -0.110602000 | 2.035615000  |
| N | -1.909265000 | 0.169425000  | 0.786170000  |

|   |              |              |              |
|---|--------------|--------------|--------------|
| C | -2.631095000 | 1.003068000  | 0.002404000  |
| C | -3.804966000 | 1.621885000  | 0.383957000  |
| H | -5.198174000 | 1.810745000  | 2.030931000  |
| H | -3.951923000 | 0.285208000  | 3.488432000  |
| H | -2.207904000 | 1.172168000  | -0.985662000 |
| H | -4.325042000 | 2.282591000  | -0.299648000 |
| N | -1.697818000 | -0.979047000 | 2.825536000  |
| C | -2.240126000 | -1.322697000 | 4.126599000  |
| H | -3.219286000 | -1.816809000 | 4.051509000  |
| H | -1.551509000 | -2.009139000 | 4.618125000  |
| H | -2.345799000 | -0.438825000 | 4.766051000  |
| C | -0.560706000 | -1.761094000 | 2.313417000  |
| H | -0.855869000 | -2.231960000 | 1.365870000  |
| H | -0.414590000 | -2.584304000 | 3.026476000  |

**TS(A4-A5)**

|   |              |              |              |
|---|--------------|--------------|--------------|
| Y | 0.569125000  | 0.123731000  | -0.663282000 |
| N | -1.191052000 | 1.013101000  | -3.820523000 |
| N | 2.420680000  | 1.427393000  | -1.660749000 |
| N | 0.383959000  | 0.681211000  | 3.003304000  |
| N | -2.062837000 | 0.189591000  | 5.829663000  |
| C | -2.400227000 | -0.993982000 | 6.617605000  |
| H | -1.616699000 | -1.211550000 | 7.373469000  |
| H | -2.437040000 | -1.856609000 | 5.941930000  |
| C | -3.744117000 | -0.825224000 | 7.321550000  |
| H | -4.529850000 | -0.733112000 | 6.560880000  |
| H | -3.963211000 | -1.723985000 | 7.909944000  |
| C | -3.739471000 | 0.419610000  | 8.208564000  |
| H | -3.035108000 | 0.270169000  | 9.039201000  |
| H | -4.726269000 | 0.582207000  | 8.657352000  |
| C | -3.305667000 | 1.637584000  | 7.393692000  |
| H | -4.067652000 | 1.867091000  | 6.637992000  |
| H | -3.205172000 | 2.521558000  | 8.034411000  |
| C | -1.979341000 | 1.371119000  | 6.685498000  |
| H | -1.712888000 | 2.238060000  | 6.072188000  |
| H | -1.175146000 | 1.254658000  | 7.442880000  |
| N | 1.399135000  | -1.987456000 | -0.384082000 |
| C | -0.165248000 | 0.950343000  | -2.920431000 |
| C | 0.883039000  | 1.718140000  | -3.491782000 |
| C | 0.464788000  | 2.234609000  | -4.776196000 |
| C | 1.046427000  | 3.014924000  | -5.782952000 |
| H | 2.061115000  | 3.391730000  | -5.681745000 |
| C | 0.307521000  | 3.300642000  | -6.926672000 |
| H | 0.751127000  | 3.903869000  | -7.714080000 |

|   |              |              |              |
|---|--------------|--------------|--------------|
| C | -1.001690000 | 2.819487000  | -7.083458000 |
| H | -1.554776000 | 3.055095000  | -7.988321000 |
| C | -1.603708000 | 2.043686000  | -6.096094000 |
| H | -2.617908000 | 1.673942000  | -6.218810000 |
| C | -0.855830000 | 1.764071000  | -4.951869000 |
| C | -2.511481000 | 0.438818000  | -3.646139000 |
| H | -2.429554000 | -0.305882000 | -2.852849000 |
| H | -2.806363000 | -0.075208000 | -4.569623000 |
| C | -3.570446000 | 1.506647000  | -3.325357000 |
| H | -3.516452000 | 1.766932000  | -2.250898000 |
| H | -3.314297000 | 2.414362000  | -3.881815000 |
| C | 2.123634000  | 1.916853000  | -2.843410000 |
| H | 2.880681000  | 2.518089000  | -3.359114000 |
| C | 3.727451000  | 1.720030000  | -1.152921000 |
| C | 3.928210000  | 2.890732000  | -0.389936000 |
| C | 5.212994000  | 3.161516000  | 0.090671000  |
| H | 5.384691000  | 4.062104000  | 0.673318000  |
| C | 6.272947000  | 2.300379000  | -0.163431000 |
| H | 7.264940000  | 2.527665000  | 0.217909000  |
| C | 6.058988000  | 1.146215000  | -0.909004000 |
| H | 6.892207000  | 0.478353000  | -1.107612000 |
| C | 4.794736000  | 0.831311000  | -1.416415000 |
| C | 2.797877000  | 3.874917000  | -0.130009000 |
| H | 1.857292000  | 3.344739000  | -0.322269000 |
| C | 2.865258000  | 5.057446000  | -1.109526000 |
| H | 3.804250000  | 5.608098000  | -0.983430000 |
| H | 2.039197000  | 5.756602000  | -0.935310000 |
| H | 2.813110000  | 4.726008000  | -2.151026000 |
| C | 2.756948000  | 4.377466000  | 1.317632000  |
| H | 2.746961000  | 3.550566000  | 2.032344000  |
| H | 1.859330000  | 4.985623000  | 1.479134000  |
| H | 3.617228000  | 5.014127000  | 1.551129000  |
| C | 4.603158000  | -0.406466000 | -2.279482000 |
| H | 3.544978000  | -0.686299000 | -2.220819000 |
| C | 5.424219000  | -1.614310000 | -1.812102000 |
| H | 6.495604000  | -1.477303000 | -1.997800000 |
| H | 5.110559000  | -2.510782000 | -2.355165000 |
| H | 5.291226000  | -1.810122000 | -0.744141000 |
| C | 4.926060000  | -0.097248000 | -3.750751000 |
| H | 4.289476000  | 0.696619000  | -4.151864000 |
| H | 4.784262000  | -0.987280000 | -4.373354000 |
| H | 5.968033000  | 0.226347000  | -3.855677000 |
| C | 0.379851000  | -0.294731000 | 1.951869000  |
| C | 1.766258000  | -0.563549000 | 1.587691000  |



|   |              |              |              |
|---|--------------|--------------|--------------|
| C | 2.572137000  | 0.280073000  | 2.471020000  |
| C | 3.948726000  | 0.459339000  | 2.599838000  |
| H | 4.634750000  | -0.044411000 | 1.925445000  |
| C | 4.439244000  | 1.299692000  | 3.598766000  |
| H | 5.510125000  | 1.441717000  | 3.706688000  |
| C | 3.556614000  | 1.963972000  | 4.458611000  |
| H | 3.951874000  | 2.611015000  | 5.237466000  |
| C | 2.175972000  | 1.818270000  | 4.337183000  |
| H | 1.505611000  | 2.340025000  | 5.013478000  |
| C | 1.687208000  | 0.975564000  | 3.330825000  |
| C | -0.739074000 | 0.961865000  | 3.864698000  |
| H | -1.663655000 | 0.925470000  | 3.280575000  |
| H | -0.645535000 | 1.995087000  | 4.215600000  |
| C | -0.850906000 | -0.013495000 | 5.047901000  |
| H | -0.873441000 | -1.031527000 | 4.642008000  |
| H | 0.066009000  | 0.051485000  | 5.664252000  |
| C | 2.232536000  | -1.367087000 | 0.550697000  |
| H | 3.311321000  | -1.504901000 | 0.457126000  |
| C | 1.783422000  | -3.244650000 | -0.863606000 |
| C | 1.677399000  | -3.535462000 | -2.258369000 |
| C | 2.149518000  | -4.753982000 | -2.746017000 |
| H | 2.083473000  | -4.958148000 | -3.810851000 |
| C | 2.712779000  | -5.710754000 | -1.907478000 |
| H | 3.087729000  | -6.647476000 | -2.310600000 |
| C | 2.756068000  | -5.457426000 | -0.543500000 |
| H | 3.147941000  | -6.220603000 | 0.125534000  |
| C | 2.280632000  | -4.262720000 | 0.004864000  |
| C | 1.020959000  | -2.555695000 | -3.207934000 |
| H | 1.223499000  | -1.542383000 | -2.827206000 |
| C | 1.551440000  | -2.595497000 | -4.644136000 |
| H | 2.643577000  | -2.535293000 | -4.671315000 |
| H | 1.150229000  | -1.750172000 | -5.212656000 |
| H | 1.251325000  | -3.509454000 | -5.169261000 |
| C | -0.502058000 | -2.754598000 | -3.204315000 |
| H | -0.751547000 | -3.761523000 | -3.558544000 |
| H | -0.993233000 | -2.028378000 | -3.860094000 |
| H | -0.913858000 | -2.648660000 | -2.195180000 |
| C | 2.216333000  | -4.167869000 | 1.526074000  |
| H | 1.779428000  | -3.203565000 | 1.794038000  |
| C | 1.290034000  | -5.251120000 | 2.102809000  |
| H | 0.294643000  | -5.202800000 | 1.648744000  |
| H | 1.178801000  | -5.124751000 | 3.186347000  |
| H | 1.682361000  | -6.258674000 | 1.926260000  |
| C | 3.600793000  | -4.234376000 | 2.184179000  |

|   |              |              |              |
|---|--------------|--------------|--------------|
| H | 4.104732000  | -5.182982000 | 1.966478000  |
| H | 3.518081000  | -4.145345000 | 3.273395000  |
| H | 4.247894000  | -3.427075000 | 1.828092000  |
| N | -4.907452000 | 1.103816000  | -3.734458000 |
| C | -5.834464000 | 2.231473000  | -3.705736000 |
| H | -5.398668000 | 3.047298000  | -4.294148000 |
| H | -5.967750000 | 2.616775000  | -2.672432000 |
| C | -7.195935000 | 1.843246000  | -4.276691000 |
| H | -7.070987000 | 1.581633000  | -5.334939000 |
| H | -7.870293000 | 2.706454000  | -4.231530000 |
| C | -7.782126000 | 0.652462000  | -3.518783000 |
| H | -8.018307000 | 0.957449000  | -2.489081000 |
| H | -8.724268000 | 0.326289000  | -3.974141000 |
| C | -6.770890000 | -0.492699000 | -3.487543000 |
| H | -6.625405000 | -0.883991000 | -4.502183000 |
| H | -7.135660000 | -1.321021000 | -2.868742000 |
| C | -5.422244000 | -0.015774000 | -2.952997000 |
| H | -5.526572000 | 0.262947000  | -1.881660000 |
| H | -4.702627000 | -0.840645000 | -2.999928000 |
| C | -3.668780000 | 2.509730000  | 1.042301000  |
| C | -3.440540000 | 1.155183000  | 0.859456000  |
| C | -2.174169000 | 0.735078000  | 0.413683000  |
| N | -1.178372000 | 1.629396000  | 0.160479000  |
| C | -1.412031000 | 2.936490000  | 0.369820000  |
| C | -2.632159000 | 3.425061000  | 0.802582000  |
| H | -4.643611000 | 2.857713000  | 1.372105000  |
| H | -4.222480000 | 0.429006000  | 1.051958000  |
| H | -0.585158000 | 3.608837000  | 0.156171000  |
| H | -2.777499000 | 4.491614000  | 0.935157000  |
| N | -1.744928000 | -0.566388000 | 0.243793000  |
| C | -2.769110000 | -1.587226000 | 0.100962000  |
| H | -3.443444000 | -1.345689000 | -0.725816000 |
| H | -2.288161000 | -2.544169000 | -0.116975000 |
| H | -3.374987000 | -1.719526000 | 1.011665000  |
| C | -0.765543000 | -1.087152000 | 1.628385000  |
| H | -0.511946000 | -2.074736000 | 1.249651000  |
| H | -1.553256000 | -1.119157000 | 2.383890000  |

**A5**

|   |              |              |              |
|---|--------------|--------------|--------------|
| Y | -0.136026000 | -0.244511000 | -0.262441000 |
| N | -1.632615000 | 0.609647000  | -3.506984000 |
| N | 1.938824000  | 0.965382000  | -1.264678000 |
| N | 0.283462000  | 0.301853000  | 3.600105000  |
| N | -2.111414000 | -0.240071000 | 6.448202000  |

|   |              |              |              |
|---|--------------|--------------|--------------|
| C | -2.445902000 | -1.444978000 | 7.203442000  |
| H | -1.654103000 | -1.689844000 | 7.942499000  |
| H | -2.497322000 | -2.285732000 | 6.501982000  |
| C | -3.779638000 | -1.288749000 | 7.929187000  |
| H | -4.573648000 | -1.170702000 | 7.180971000  |
| H | -3.996709000 | -2.202795000 | 8.494378000  |
| C | -3.756834000 | -0.069933000 | 8.851321000  |
| H | -3.044505000 | -0.247114000 | 9.669801000  |
| H | -4.737627000 | 0.085675000  | 9.315504000  |
| C | -3.324937000 | 1.168857000  | 8.067257000  |
| H | -4.093689000 | 1.424344000  | 7.327108000  |
| H | -3.211824000 | 2.033182000  | 8.732253000  |
| C | -2.008789000 | 0.915431000  | 7.335513000  |
| H | -1.745473000 | 1.798277000  | 6.743676000  |
| H | -1.195651000 | 0.773278000  | 8.079200000  |
| N | 1.207878000  | -2.242639000 | 0.177159000  |
| C | -0.632195000 | 0.544462000  | -2.576056000 |
| C | 0.468486000  | 1.212200000  | -3.161607000 |
| C | 0.116585000  | 1.675164000  | -4.483680000 |
| C | 0.767036000  | 2.360863000  | -5.517588000 |
| H | 1.799393000  | 2.684723000  | -5.411404000 |
| C | 0.071518000  | 2.621928000  | -6.693348000 |
| H | 0.567094000  | 3.152094000  | -7.502152000 |
| C | -1.262087000 | 2.211963000  | -6.855050000 |
| H | -1.780265000 | 2.430790000  | -7.784538000 |
| C | -1.932497000 | 1.532097000  | -5.842257000 |
| H | -2.967744000 | 1.224212000  | -5.961554000 |
| C | -1.225021000 | 1.272959000  | -4.666877000 |
| C | -2.990642000 | 0.118530000  | -3.359746000 |
| H | -2.993964000 | -0.541953000 | -2.494014000 |
| H | -3.252598000 | -0.458797000 | -4.255453000 |
| C | -4.014065000 | 1.260476000  | -3.201251000 |
| H | -4.189451000 | 1.453519000  | -2.125879000 |
| H | -3.575984000 | 2.174202000  | -3.615561000 |
| C | 1.692388000  | 1.394243000  | -2.480314000 |
| H | 2.484007000  | 1.940833000  | -3.004919000 |
| C | 3.257639000  | 1.285100000  | -0.793625000 |
| C | 3.457107000  | 2.481732000  | -0.069760000 |
| C | 4.754832000  | 2.819752000  | 0.323768000  |
| H | 4.921525000  | 3.742101000  | 0.872151000  |
| C | 5.835252000  | 1.998844000  | 0.025381000  |
| H | 6.838053000  | 2.278730000  | 0.337189000  |
| C | 5.625748000  | 0.818718000  | -0.678133000 |
| H | 6.474264000  | 0.183699000  | -0.916635000 |

|   |              |              |              |
|---|--------------|--------------|--------------|
| C | 4.347717000  | 0.438998000  | -1.104411000 |
| C | 2.301141000  | 3.424395000  | 0.223087000  |
| H | 1.384048000  | 2.826796000  | 0.159720000  |
| C | 2.203803000  | 4.526334000  | -0.843889000 |
| H | 3.113615000  | 5.137325000  | -0.852052000 |
| H | 1.354530000  | 5.188475000  | -0.640483000 |
| H | 2.071930000  | 4.111745000  | -1.847371000 |
| C | 2.362551000  | 4.041834000  | 1.624386000  |
| H | 2.463351000  | 3.278061000  | 2.399646000  |
| H | 1.451448000  | 4.618608000  | 1.821785000  |
| H | 3.201040000  | 4.739590000  | 1.725389000  |
| C | 4.179743000  | -0.823046000 | -1.938165000 |
| H | 3.132252000  | -1.133379000 | -1.858846000 |
| C | 5.047549000  | -1.992338000 | -1.455354000 |
| H | 6.110201000  | -1.824049000 | -1.663361000 |
| H | 4.755042000  | -2.912367000 | -1.969967000 |
| H | 4.942426000  | -2.166719000 | -0.380711000 |
| C | 4.476376000  | -0.547831000 | -3.421986000 |
| H | 3.808004000  | 0.207841000  | -3.843653000 |
| H | 4.363261000  | -1.463659000 | -4.012732000 |
| H | 5.504775000  | -0.190631000 | -3.548633000 |
| C | 0.251074000  | -0.646131000 | 2.582155000  |
| C | 1.593435000  | -0.684284000 | 1.992762000  |
| C | 2.430168000  | 0.175455000  | 2.823687000  |
| C | 3.789448000  | 0.475648000  | 2.828541000  |
| H | 4.449430000  | 0.075566000  | 2.064596000  |
| C | 4.296944000  | 1.318900000  | 3.821749000  |
| H | 5.357228000  | 1.552925000  | 3.832941000  |
| C | 3.454212000  | 1.869939000  | 4.787809000  |
| H | 3.863932000  | 2.523568000  | 5.552870000  |
| C | 2.081752000  | 1.596332000  | 4.788520000  |
| H | 1.434257000  | 2.022329000  | 5.548858000  |
| C | 1.588954000  | 0.747707000  | 3.803241000  |
| C | -0.827619000 | 0.579672000  | 4.482730000  |
| H | -1.755693000 | 0.559527000  | 3.904403000  |
| H | -0.713202000 | 1.604239000  | 4.848678000  |
| C | -0.918737000 | -0.427838000 | 5.636746000  |
| H | -0.960172000 | -1.429230000 | 5.194348000  |
| H | 0.012723000  | -0.385203000 | 6.234414000  |
| C | 2.023741000  | -1.583832000 | 1.017442000  |
| H | 3.104310000  | -1.727033000 | 0.913659000  |
| C | 1.719146000  | -3.413223000 | -0.419110000 |
| C | 1.489730000  | -3.656098000 | -1.800872000 |
| C | 2.060879000  | -4.776255000 | -2.402078000 |

|   |              |              |              |
|---|--------------|--------------|--------------|
| H | 1.907560000  | -4.947024000 | -3.463048000 |
| C | 2.828600000  | -5.679008000 | -1.670580000 |
| H | 3.277901000  | -6.539615000 | -2.158230000 |
| C | 2.978229000  | -5.484437000 | -0.305789000 |
| H | 3.528422000  | -6.218215000 | 0.278171000  |
| C | 2.418754000  | -4.382184000 | 0.351916000  |
| C | 0.578150000  | -2.742020000 | -2.592781000 |
| H | 0.781516000  | -1.705476000 | -2.276712000 |
| C | 0.800876000  | -2.749197000 | -4.106165000 |
| H | 1.850915000  | -2.576406000 | -4.359494000 |
| H | 0.207148000  | -1.955984000 | -4.569846000 |
| H | 0.491480000  | -3.698505000 | -4.557716000 |
| C | -0.888573000 | -3.074530000 | -2.272987000 |
| H | -1.123639000 | -4.086631000 | -2.620366000 |
| H | -1.568210000 | -2.374744000 | -2.768138000 |
| H | -1.085691000 | -3.058287000 | -1.194313000 |
| C | 2.487283000  | -4.364606000 | 1.876820000  |
| H | 1.965273000  | -3.476481000 | 2.243201000  |
| C | 1.743066000  | -5.575880000 | 2.462584000  |
| H | 0.709755000  | -5.614718000 | 2.104049000  |
| H | 1.722426000  | -5.518469000 | 3.556725000  |
| H | 2.226649000  | -6.519708000 | 2.188219000  |
| C | 3.924986000  | -4.303419000 | 2.409768000  |
| H | 4.506401000  | -5.178341000 | 2.098152000  |
| H | 3.928500000  | -4.276556000 | 3.504853000  |
| H | 4.451440000  | -3.413924000 | 2.050063000  |
| N | -5.249638000 | 0.999507000  | -3.926719000 |
| C | -6.068316000 | 2.203164000  | -4.039846000 |
| H | -5.447833000 | 3.000479000  | -4.465079000 |
| H | -6.405810000 | 2.555413000  | -3.042219000 |
| C | -7.286892000 | 1.957832000  | -4.926764000 |
| H | -6.940112000 | 1.732670000  | -5.943237000 |
| H | -7.888275000 | 2.872823000  | -4.982658000 |
| C | -8.119309000 | 0.790005000  | -4.397398000 |
| H | -8.566476000 | 1.070873000  | -3.433021000 |
| H | -8.950356000 | 0.565627000  | -5.076105000 |
| C | -7.231535000 | -0.438814000 | -4.202063000 |
| H | -6.881063000 | -0.800337000 | -5.177033000 |
| H | -7.791991000 | -1.256219000 | -3.733268000 |
| C | -6.016324000 | -0.097504000 | -3.343825000 |
| H | -6.351930000 | 0.157207000  | -2.315154000 |
| H | -5.367967000 | -0.976388000 | -3.256327000 |
| C | -3.821291000 | 2.667086000  | 1.585392000  |
| C | -3.847447000 | 1.397560000  | 1.048555000  |

|   |              |              |              |
|---|--------------|--------------|--------------|
| C | -2.645787000 | 0.838953000  | 0.518678000  |
| N | -1.473789000 | 1.563679000  | 0.603838000  |
| C | -1.483670000 | 2.793516000  | 1.134372000  |
| C | -2.622957000 | 3.401507000  | 1.630589000  |
| H | -4.737853000 | 3.101224000  | 1.978648000  |
| H | -4.767989000 | 0.826222000  | 1.016348000  |
| H | -0.523988000 | 3.302390000  | 1.164347000  |
| H | -2.580367000 | 4.402426000  | 2.044115000  |
| N | -2.486344000 | -0.361760000 | -0.046875000 |
| C | -3.595842000 | -1.281022000 | -0.018393000 |
| H | -4.480859000 | -0.905239000 | -0.557300000 |
| H | -3.306231000 | -2.223306000 | -0.492764000 |
| H | -3.922958000 | -1.519530000 | 1.007553000  |
| C | -0.844847000 | -1.377856000 | 2.209297000  |
| H | -0.709642000 | -2.235965000 | 1.560408000  |
| H | -1.796489000 | -1.274367000 | 2.714633000  |

**5d**

|   |              |              |              |
|---|--------------|--------------|--------------|
| Y | 8.218913000  | 22.780973000 | 18.132381000 |
| N | 10.883221000 | 19.428045000 | 17.886552000 |
| N | 10.502490000 | 17.076647000 | 14.972684000 |
| N | 8.422584000  | 21.920727000 | 20.477937000 |
| N | 12.460210000 | 23.004909000 | 17.910462000 |
| N | 14.281008000 | 24.872068000 | 20.621490000 |
| N | 8.685695000  | 23.340279000 | 15.754231000 |
| N | 6.842115000  | 24.728209000 | 18.863777000 |
| C | 6.791000000  | 25.932557000 | 19.437516000 |
| H | 7.742199000  | 26.336994000 | 19.776001000 |
| C | 5.616075000  | 26.650294000 | 19.602729000 |
| H | 5.623258000  | 27.624243000 | 20.078160000 |
| C | 4.432538000  | 26.066777000 | 19.126711000 |
| H | 3.488417000  | 26.597329000 | 19.228795000 |
| C | 4.451498000  | 24.823919000 | 18.522268000 |
| H | 3.541297000  | 24.371943000 | 18.145319000 |
| C | 5.692003000  | 24.137387000 | 18.403254000 |
| N | 5.918184000  | 22.921410000 | 17.873224000 |
| C | 9.806857000  | 20.051103000 | 18.472802000 |
| C | 10.168945000 | 20.352725000 | 19.824279000 |
| C | 11.484613000 | 19.791892000 | 20.051182000 |
| C | 12.348701000 | 19.733667000 | 21.148284000 |
| H | 12.057315000 | 20.148663000 | 22.109526000 |
| C | 13.595629000 | 19.126102000 | 20.999733000 |
| H | 14.265625000 | 19.065158000 | 21.853054000 |
| C | 13.994204000 | 18.591068000 | 19.769452000 |

|   |              |              |              |
|---|--------------|--------------|--------------|
| H | 14.969306000 | 18.121685000 | 19.675606000 |
| C | 13.151891000 | 18.647423000 | 18.657171000 |
| H | 13.464999000 | 18.234271000 | 17.703533000 |
| C | 11.907263000 | 19.246131000 | 18.818219000 |
| C | 10.944958000 | 18.971382000 | 16.512440000 |
| H | 11.966797000 | 19.133565000 | 16.158629000 |
| H | 10.304242000 | 19.609244000 | 15.900472000 |
| C | 10.509385000 | 17.509651000 | 16.362984000 |
| H | 11.146622000 | 16.867603000 | 17.001657000 |
| H | 9.489435000  | 17.423754000 | 16.754574000 |
| C | 9.677355000  | 15.884363000 | 14.788892000 |
| H | 8.683145000  | 16.086819000 | 15.203745000 |
| H | 10.090772000 | 15.020514000 | 15.350690000 |
| C | 9.560967000  | 15.514037000 | 13.313011000 |
| H | 8.944131000  | 14.613390000 | 13.211269000 |
| H | 9.041897000  | 16.325599000 | 12.787578000 |
| C | 10.942496000 | 15.301183000 | 12.694254000 |
| H | 11.405308000 | 14.408177000 | 13.138162000 |
| H | 10.861596000 | 15.111565000 | 11.617655000 |
| C | 11.828153000 | 16.516731000 | 12.966146000 |
| H | 11.442935000 | 17.385269000 | 12.417256000 |
| H | 12.852642000 | 16.340510000 | 12.617888000 |
| C | 11.851619000 | 16.851871000 | 14.455849000 |
| H | 12.351661000 | 16.029108000 | 15.009797000 |
| H | 12.450872000 | 17.753685000 | 14.615511000 |
| C | 8.570843000  | 20.322229000 | 17.822397000 |
| H | 7.720062000  | 20.212315000 | 18.506865000 |
| H | 8.394038000  | 19.814047000 | 16.877865000 |
| C | 9.425900000  | 21.107909000 | 20.748842000 |
| H | 9.737933000  | 21.020490000 | 21.795566000 |
| C | 7.790680000  | 22.540475000 | 21.603378000 |
| C | 6.448174000  | 22.193437000 | 21.892139000 |
| C | 5.815109000  | 22.804790000 | 22.975745000 |
| H | 4.787146000  | 22.545340000 | 23.208916000 |
| C | 6.477466000  | 23.735110000 | 23.770324000 |
| H | 5.967718000  | 24.198320000 | 24.610858000 |
| C | 7.794591000  | 24.061951000 | 23.483470000 |
| H | 8.313096000  | 24.784387000 | 24.108964000 |
| C | 8.476130000  | 23.483646000 | 22.405803000 |
| C | 5.734722000  | 21.118757000 | 21.086281000 |
| H | 6.099980000  | 21.195595000 | 20.055896000 |
| C | 6.096680000  | 19.720065000 | 21.611782000 |
| H | 7.175973000  | 19.545044000 | 21.583558000 |
| H | 5.612715000  | 18.941936000 | 21.010208000 |

|   |              |              |              |
|---|--------------|--------------|--------------|
| H | 5.763469000  | 19.600591000 | 22.649134000 |
| C | 4.213808000  | 21.290284000 | 21.036451000 |
| H | 3.744476000  | 21.097926000 | 22.008010000 |
| H | 3.782496000  | 20.574229000 | 20.328932000 |
| H | 3.933398000  | 22.298357000 | 20.715918000 |
| C | 9.922435000  | 23.892642000 | 22.163090000 |
| H | 10.247555000 | 23.432486000 | 21.225706000 |
| C | 10.850388000 | 23.390582000 | 23.280180000 |
| H | 10.592356000 | 23.849652000 | 24.241145000 |
| H | 11.891652000 | 23.644645000 | 23.053369000 |
| H | 10.782324000 | 22.305894000 | 23.410914000 |
| C | 10.084368000 | 25.409943000 | 21.996564000 |
| H | 9.450499000  | 25.791605000 | 21.191527000 |
| H | 11.126221000 | 25.651799000 | 21.759236000 |
| H | 9.820598000  | 25.950096000 | 22.912174000 |
| C | 11.226750000 | 23.440422000 | 17.481197000 |
| C | 11.067437000 | 23.001587000 | 16.124643000 |
| C | 12.309952000 | 22.370697000 | 15.729877000 |
| C | 12.774249000 | 21.778226000 | 14.552313000 |
| H | 12.155119000 | 21.753806000 | 13.659512000 |
| C | 14.052225000 | 21.218604000 | 14.530979000 |
| H | 14.424755000 | 20.770703000 | 13.613746000 |
| C | 14.861772000 | 21.230358000 | 15.672498000 |
| H | 15.853975000 | 20.789854000 | 15.635003000 |
| C | 14.413963000 | 21.806771000 | 16.863147000 |
| H | 15.043455000 | 21.809982000 | 17.747358000 |
| C | 13.142760000 | 22.370289000 | 16.871228000 |
| C | 13.023025000 | 23.251518000 | 19.222363000 |
| H | 13.642142000 | 22.388985000 | 19.482353000 |
| H | 12.213475000 | 23.280767000 | 19.954333000 |
| C | 13.812262000 | 24.564776000 | 19.277794000 |
| H | 14.637128000 | 24.530234000 | 18.539919000 |
| H | 13.140124000 | 25.368563000 | 18.957141000 |
| C | 14.602723000 | 26.291295000 | 20.762721000 |
| H | 13.730779000 | 26.873969000 | 20.443707000 |
| H | 15.443699000 | 26.580179000 | 20.098029000 |
| C | 14.961965000 | 26.636201000 | 22.205356000 |
| H | 15.204022000 | 27.703196000 | 22.275372000 |
| H | 14.083101000 | 26.458675000 | 22.838040000 |
| C | 16.128985000 | 25.778854000 | 22.694579000 |
| H | 16.337636000 | 25.972624000 | 23.753081000 |
| H | 17.037436000 | 26.051535000 | 22.138648000 |
| C | 15.821524000 | 24.299620000 | 22.464493000 |
| H | 14.996339000 | 23.987626000 | 23.117034000 |



|   |              |              |              |
|---|--------------|--------------|--------------|
| H | 16.687558000 | 23.676323000 | 22.716392000 |
| C | 15.421390000 | 24.044809000 | 21.013140000 |
| H | 16.292524000 | 24.239918000 | 20.352184000 |
| H | 15.157984000 | 22.989707000 | 20.888629000 |
| C | 10.311396000 | 24.186053000 | 18.267354000 |
| H | 9.739236000  | 24.907373000 | 17.673811000 |
| H | 10.681651000 | 24.614487000 | 19.194253000 |
| C | 9.914115000  | 23.109322000 | 15.328916000 |
| H | 10.059455000 | 22.962610000 | 14.252541000 |
| C | 7.680579000  | 23.485718000 | 14.745396000 |
| C | 7.287539000  | 22.396337000 | 13.932557000 |
| C | 6.294893000  | 22.609567000 | 12.967983000 |
| H | 5.988575000  | 21.781108000 | 12.333998000 |
| C | 5.694022000  | 23.849180000 | 12.804460000 |
| H | 4.924883000  | 23.990604000 | 12.049829000 |
| C | 6.087902000  | 24.912175000 | 13.611498000 |
| H | 5.621589000  | 25.883148000 | 13.474494000 |
| C | 7.078357000  | 24.757297000 | 14.583008000 |
| C | 7.890603000  | 21.003627000 | 14.053240000 |
| H | 8.566705000  | 21.003752000 | 14.912625000 |
| C | 6.822774000  | 19.933617000 | 14.322326000 |
| H | 6.241155000  | 20.168086000 | 15.218305000 |
| H | 7.294291000  | 18.955008000 | 14.464679000 |
| H | 6.121780000  | 19.841907000 | 13.485739000 |
| C | 8.714941000  | 20.625328000 | 12.813156000 |
| H | 8.079611000  | 20.551401000 | 11.923349000 |
| H | 9.203035000  | 19.655762000 | 12.962050000 |
| H | 9.489349000  | 21.368812000 | 12.598215000 |
| C | 7.559123000  | 25.951749000 | 15.392232000 |
| H | 7.889917000  | 25.570179000 | 16.364344000 |
| C | 6.474062000  | 26.996301000 | 15.665583000 |
| H | 6.173445000  | 27.526739000 | 14.754880000 |
| H | 6.852448000  | 27.749878000 | 16.363696000 |
| H | 5.583420000  | 26.543637000 | 16.110776000 |
| C | 8.774648000  | 26.604572000 | 14.713776000 |
| H | 9.594762000  | 25.892371000 | 14.583104000 |
| H | 9.147653000  | 27.443947000 | 15.311822000 |
| H | 8.502785000  | 26.989161000 | 13.724153000 |
| C | 4.802423000  | 22.202307000 | 17.306970000 |
| H | 4.378937000  | 22.708920000 | 16.426105000 |
| H | 3.985351000  | 22.053372000 | 18.030015000 |
| H | 5.131847000  | 21.210536000 | 16.985933000 |

**6d**

|   |              |              |              |
|---|--------------|--------------|--------------|
| Y | 8.269063000  | 23.039537000 | 18.212229000 |
| N | 10.299033000 | 20.005144000 | 17.650419000 |
| N | 10.023529000 | 18.486062000 | 14.212442000 |
| N | 8.058097000  | 22.154095000 | 20.560191000 |
| N | 11.865843000 | 23.999450000 | 18.348384000 |
| N | 13.055332000 | 25.322067000 | 21.670765000 |
| N | 8.401780000  | 23.979221000 | 15.898935000 |
| N | 6.782132000  | 24.796616000 | 19.031565000 |
| C | 6.650508000  | 25.944809000 | 19.702542000 |
| H | 7.573654000  | 26.375036000 | 20.083846000 |
| C | 5.434074000  | 26.574475000 | 19.906313000 |
| H | 5.375590000  | 27.504089000 | 20.460282000 |
| C | 4.294423000  | 25.967586000 | 19.353699000 |
| H | 3.319346000  | 26.433248000 | 19.478452000 |
| C | 4.396825000  | 24.788601000 | 18.642853000 |
| H | 3.521118000  | 24.325200000 | 18.203650000 |
| C | 5.675320000  | 24.175757000 | 18.497717000 |
| N | 5.966308000  | 23.017198000 | 17.881772000 |
| C | 9.428783000  | 20.824736000 | 18.316143000 |
| C | 9.573797000  | 20.493713000 | 19.687488000 |
| C | 10.564724000 | 19.453587000 | 19.833583000 |
| C | 11.133439000 | 18.758458000 | 20.909029000 |
| H | 10.814576000 | 18.952411000 | 21.930068000 |
| C | 12.122030000 | 17.814908000 | 20.654445000 |
| H | 12.569103000 | 17.269396000 | 21.480978000 |
| C | 12.558600000 | 17.559593000 | 19.344201000 |
| H | 13.339540000 | 16.824023000 | 19.173129000 |
| C | 12.008409000 | 18.235974000 | 18.260004000 |
| H | 12.354591000 | 18.036215000 | 17.250477000 |
| C | 11.009263000 | 19.175806000 | 18.521256000 |
| C | 10.454549000 | 19.931881000 | 16.208438000 |
| H | 11.523750000 | 19.971215000 | 15.973701000 |
| H | 9.993947000  | 20.820300000 | 15.774068000 |
| C | 9.800960000  | 18.662913000 | 15.642023000 |
| H | 10.141931000 | 17.784045000 | 16.221074000 |
| H | 8.721737000  | 18.745916000 | 15.813631000 |
| C | 9.083160000  | 17.512867000 | 13.656893000 |
| H | 8.067113000  | 17.827738000 | 13.919929000 |
| H | 9.235460000  | 16.511150000 | 14.110573000 |
| C | 9.219371000  | 17.404968000 | 12.140786000 |
| H | 8.508381000  | 16.659610000 | 11.765310000 |
| H | 8.947103000  | 18.368652000 | 11.692593000 |
| C | 10.650451000 | 17.039924000 | 11.746883000 |
| H | 10.870842000 | 16.017408000 | 12.085171000 |

|   |              |              |              |
|---|--------------|--------------|--------------|
| H | 10.766780000 | 17.043142000 | 10.656980000 |
| C | 11.633078000 | 18.010457000 | 12.400669000 |
| H | 11.505497000 | 19.012602000 | 11.972627000 |
| H | 12.668978000 | 17.705567000 | 12.211603000 |
| C | 11.398340000 | 18.090159000 | 13.907154000 |
| H | 11.632905000 | 17.107547000 | 14.368805000 |
| H | 12.087963000 | 18.819556000 | 14.342732000 |
| C | 8.821986000  | 21.103407000 | 20.725285000 |
| H | 8.877373000  | 20.650517000 | 21.722070000 |
| C | 7.244058000  | 22.524051000 | 21.679970000 |
| C | 6.010608000  | 21.866079000 | 21.884330000 |
| C | 5.246207000  | 22.218147000 | 23.001777000 |
| H | 4.299994000  | 21.714599000 | 23.178776000 |
| C | 5.670582000  | 23.198452000 | 23.889151000 |
| H | 5.062199000  | 23.456095000 | 24.752017000 |
| C | 6.877238000  | 23.850357000 | 23.664677000 |
| H | 7.203408000  | 24.617146000 | 24.361216000 |
| C | 7.680985000  | 23.532298000 | 22.566428000 |
| C | 5.512880000  | 20.780667000 | 20.941063000 |
| H | 6.053762000  | 20.897538000 | 19.996075000 |
| C | 5.814758000  | 19.377611000 | 21.490296000 |
| H | 6.887022000  | 19.218596000 | 21.637686000 |
| H | 5.454333000  | 18.606303000 | 20.800201000 |
| H | 5.320815000  | 19.223252000 | 22.456599000 |
| C | 4.017107000  | 20.914586000 | 20.628345000 |
| H | 3.392276000  | 20.682125000 | 21.497875000 |
| H | 3.734761000  | 20.213728000 | 19.835340000 |
| H | 3.769861000  | 21.927461000 | 20.297548000 |
| C | 9.022052000  | 24.219164000 | 22.378508000 |
| H | 9.257965000  | 24.181096000 | 21.306937000 |
| C | 10.137394000 | 23.471481000 | 23.127161000 |
| H | 9.936982000  | 23.473195000 | 24.205019000 |
| H | 11.106885000 | 23.950848000 | 22.949785000 |
| H | 10.208626000 | 22.427184000 | 22.808109000 |
| C | 9.013833000  | 25.693693000 | 22.796423000 |
| H | 8.170000000  | 26.235740000 | 22.359648000 |
| H | 9.941799000  | 26.176466000 | 22.475400000 |
| H | 8.956335000  | 25.808098000 | 23.884374000 |
| C | 10.591596000 | 23.984715000 | 17.851279000 |
| C | 10.735676000 | 24.177158000 | 16.451864000 |
| C | 12.135023000 | 24.301637000 | 16.117213000 |
| C | 12.869871000 | 24.477979000 | 14.937579000 |
| H | 12.369393000 | 24.572966000 | 13.977183000 |
| C | 14.257624000 | 24.525173000 | 15.008765000 |

|   |              |              |              |
|---|--------------|--------------|--------------|
| H | 14.837332000 | 24.663184000 | 14.100175000 |
| C | 14.924130000 | 24.390511000 | 16.237372000 |
| H | 16.009686000 | 24.422204000 | 16.264668000 |
| C | 14.215918000 | 24.214422000 | 17.422280000 |
| H | 14.738930000 | 24.107797000 | 18.367930000 |
| C | 12.822560000 | 24.175987000 | 17.344955000 |
| C | 12.222743000 | 23.935955000 | 19.754601000 |
| H | 13.036210000 | 23.212146000 | 19.874276000 |
| H | 11.361170000 | 23.553884000 | 20.303594000 |
| C | 12.619551000 | 25.322691000 | 20.280025000 |
| H | 13.385309000 | 25.760497000 | 19.611988000 |
| H | 11.735673000 | 25.965510000 | 20.198774000 |
| C | 13.052308000 | 26.683375000 | 22.208111000 |
| H | 12.058762000 | 27.115516000 | 22.043646000 |
| H | 13.774353000 | 27.325909000 | 21.661795000 |
| C | 13.390609000 | 26.699475000 | 23.695442000 |
| H | 13.385660000 | 27.734390000 | 24.057227000 |
| H | 12.607158000 | 26.159667000 | 24.241840000 |
| C | 14.744953000 | 26.039860000 | 23.949390000 |
| H | 14.954900000 | 25.981342000 | 25.023583000 |
| H | 15.538439000 | 26.657795000 | 23.505414000 |
| C | 14.773139000 | 24.649999000 | 23.315168000 |
| H | 14.072682000 | 23.988771000 | 23.840431000 |
| H | 15.769400000 | 24.200530000 | 23.400486000 |
| C | 14.374743000 | 24.713410000 | 21.841992000 |
| H | 15.144031000 | 25.282384000 | 21.277890000 |
| H | 14.358966000 | 23.700786000 | 21.427286000 |
| C | 9.635801000  | 24.264359000 | 15.562565000 |
| H | 9.833698000  | 24.609548000 | 14.541021000 |
| C | 7.379448000  | 24.308342000 | 14.953481000 |
| C | 6.835560000  | 23.300508000 | 14.125933000 |
| C | 5.828817000  | 23.648853000 | 13.221973000 |
| H | 5.405630000  | 22.886014000 | 12.575332000 |
| C | 5.366127000  | 24.956805000 | 13.125833000 |
| H | 4.585288000  | 25.209173000 | 12.413313000 |
| C | 5.911636000  | 25.938304000 | 13.942754000 |
| H | 5.551771000  | 26.960284000 | 13.862012000 |
| C | 6.916471000  | 25.640605000 | 14.869713000 |
| C | 7.386982000  | 21.885679000 | 14.156214000 |
| H | 7.766875000  | 21.707540000 | 15.171198000 |
| C | 6.338567000  | 20.808337000 | 13.860807000 |
| H | 5.445367000  | 20.928249000 | 14.480487000 |
| H | 6.758771000  | 19.816291000 | 14.053305000 |
| H | 6.024791000  | 20.821856000 | 12.811243000 |

|   |             |              |              |
|---|-------------|--------------|--------------|
| C | 8.573239000 | 21.746914000 | 13.187455000 |
| H | 8.240012000 | 21.913499000 | 12.156373000 |
| H | 9.021362000 | 20.748943000 | 13.255959000 |
| H | 9.354520000 | 22.482461000 | 13.401732000 |
| C | 7.495741000 | 26.754225000 | 15.730875000 |
| H | 8.040842000 | 26.285579000 | 16.556560000 |
| C | 6.412966000 | 27.644879000 | 16.352360000 |
| H | 5.883501000 | 28.234947000 | 15.595806000 |
| H | 6.867367000 | 28.353359000 | 17.053088000 |
| H | 5.675511000 | 27.052110000 | 16.899591000 |
| C | 8.495529000 | 27.607261000 | 14.934216000 |
| H | 9.321654000 | 27.007029000 | 14.541242000 |
| H | 8.922661000 | 28.393504000 | 15.566808000 |
| H | 8.003630000 | 28.090407000 | 14.082186000 |
| C | 4.903533000 | 22.309217000 | 17.210189000 |
| H | 4.514639000 | 22.861357000 | 16.340762000 |
| H | 4.053444000 | 22.090301000 | 17.873637000 |
| H | 5.281356000 | 21.348924000 | 16.848679000 |

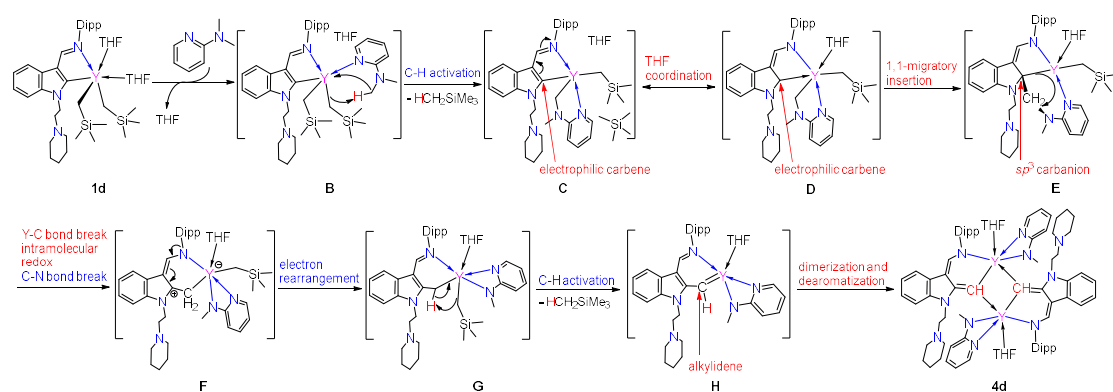

**Scheme S5.** Possible mechanism of the reaction of **1d** with 2-*N,N*-dimethylaminopyridine.

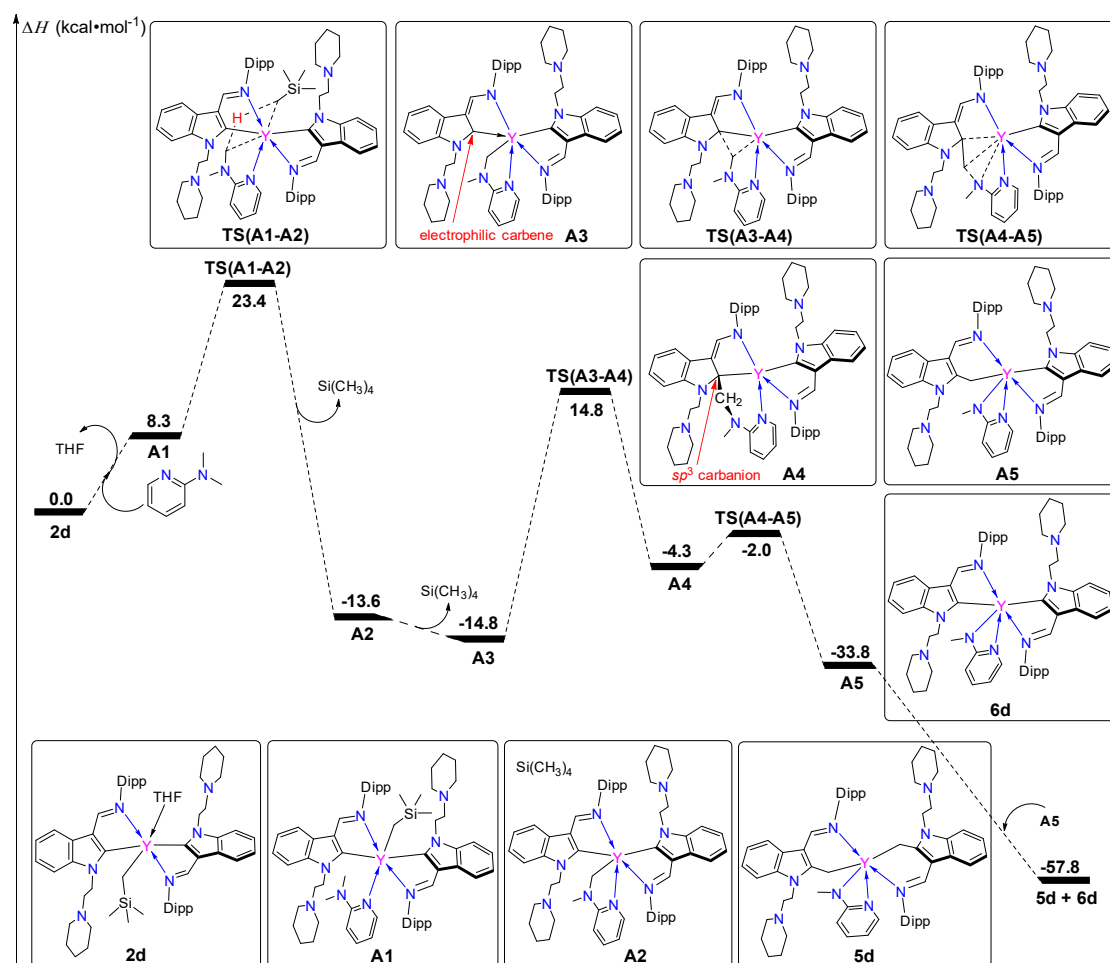

**Scheme S6.** Computed enthalpy profile for the formation of **5d** and **6d** from **2d** at room temperature. The enthalpy is given in kcal·mol<sup>-1</sup>.

## 5. Olex2 Drawing of Complexes

Diagrams of complexes **1a-1e**

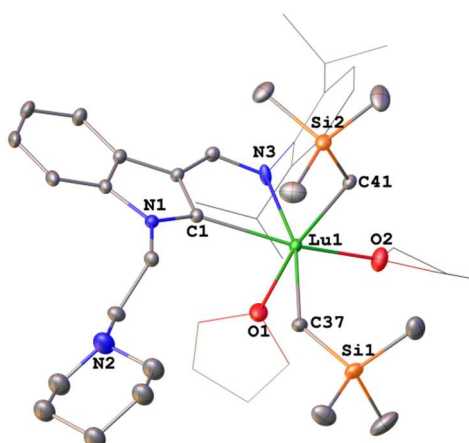

**Fig. S54.** Diagram of complex **1a** with 30% probability thermal ellipsoids. All hydrogen atoms were omitted and the diisopropylphenyl (Dipp) group and the carbon atoms of THF were drawn in wireframe style for clarity. Selected bond lengths (Å): Lu(1)-C(1), 2.432(5); Lu(1)-C(37), 2.370(6); Lu(1)-C(41), 2.345(6); Lu(1)-N(3), 2.541(10); Selected bond angles (deg): C(1)-Lu(1)-N(3),

71.5(3); C(1)-Lu(1)-C(37), 98.6(2); C(1)-Lu(1)-C(41), 102.84(19); C(37)-Lu(1)-C(41), 96.1(2).

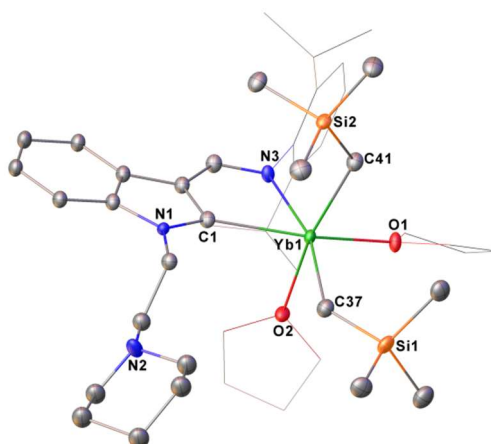

**Fig. S55.** Diagram of complex **1b** with 30% probability thermal ellipsoids. All hydrogen atoms were omitted and the diisopropylphenyl (Dipp) group and the carbon atoms of THF were drawn in wireframe style for clarity. Selected bond lengths (Å): Yb(1)-C(1), 2.445(9); Yb(1)-C(37), 2.378(10); Yb(1)-C(41), 2.361(10); Yb(1)-N(3), 2.599(7); Selected bond angles (deg): C(1)-Yb(1)-N(3), 70.8(3); C(1)-Yb(1)-C(37), 98.5(3); C(1)-Yb(1)-C(41), 102.2(3); C(37)-Yb(1)-C(41), 94.9(4).

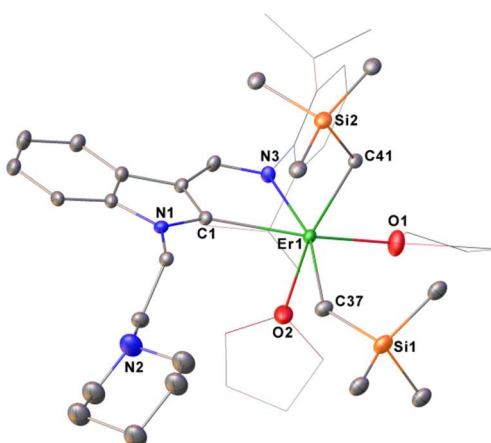

**Fig. S56.** Diagram of complex **1c** with 30% probability thermal ellipsoids. All hydrogen atoms were omitted and the diisopropylphenyl (Dipp) group and the carbon atoms of THF were drawn in wireframe style for clarity. Selected bond lengths (Å): Er(1)-C(1), 2.472(8); Er(1)-C(37), 2.387(8); Er(1)-C(41), 2.380(8); Er(1)-N(3), 2.617(6); Selected bond angles (deg): C(1)-Er(1)-N(3), 70.2(3); C(1)-Er(1)-C(37), 98.7(3); C(1)-Er(1)-C(41), 103.3(3); C(37)-Er(1)-C(41), 95.3(3).

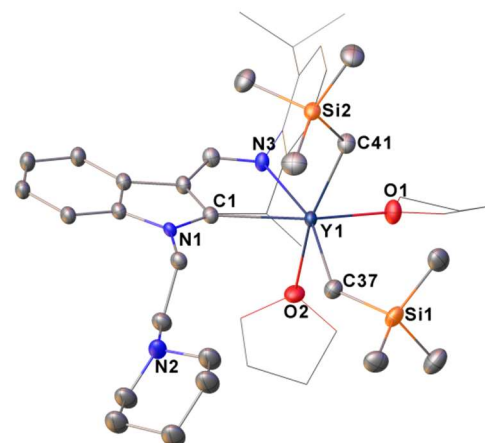

**Fig. S57.** Diagram of complex **1d** with 30% probability thermal ellipsoids. All hydrogen atoms were omitted and the diisopropylphenyl (Dipp) group and the carbon atoms of THF were drawn in wireframe style for clarity. Selected bond lengths (Å): Y(1)-C(1), 2.469(6); Y(1)-C(37), 2.393(7); Y(1)-C(41), 2.382(6); Y(1)-N(3), 2.606(5); Selected bond angles (deg): C(1)-Y(1)-N(3), 69.77(17); C(1)-Y(1)-C(37), 98.1(2); C(1)-Y(1)-C(41), 103.7(2); C(37)-Y(1)-C(41), 95.4(2).

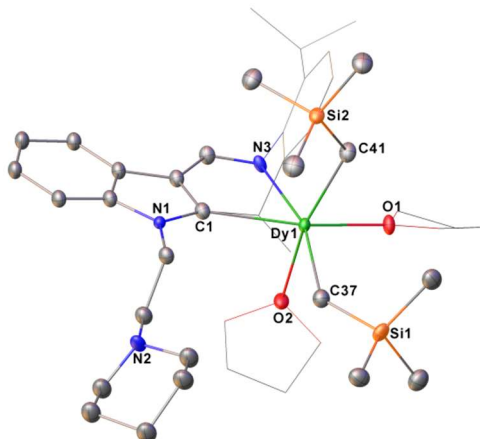

**Fig. S58.** Diagram of complex **1e** with 30% probability thermal ellipsoids. All hydrogen atoms were omitted and the diisopropylphenyl (Dipp) group and the carbon atoms of THF were drawn in wireframe style for clarity. Selected bond lengths (Å): Dy(1)-C(1), 2.498(10); Dy(1)-C(37), 2.427(11); Dy(1)-C(41), 2.399(11); Dy(1)-N(3), 2.626(8); Selected bond angles (deg): C(1)-Dy(1)-N(3), 69.6(3); C(1)-Dy(1)-C(37), 98.5(4); C(1)-Dy(1)-C(41), 103.4(3); C(37)-Dy(1)-C(41), 95.1(4).  
Diagrams of complexes **2a-2e**

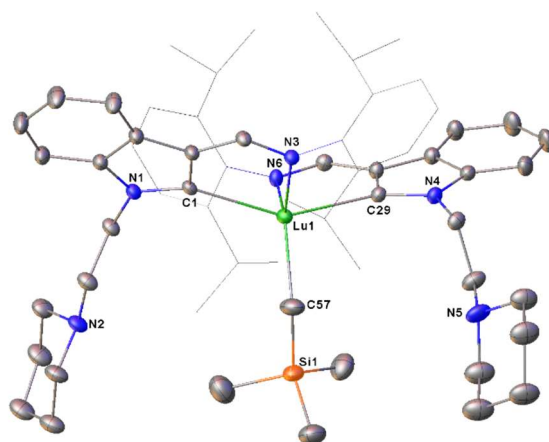

**Fig. S59.** Diagram of complex **2a** with 30% probability thermal ellipsoids. All hydrogen atoms were omitted and the diisopropylphenyl (Dipp) group was drawn in wireframe style for clarity. Selected bond lengths (Å): Lu(1)-C(1), 2.421(4); Lu(1)-C(29), 2.417(4); Lu(1)-C(57), 2.285(6); Lu(1)-N(3), 2.339(3); Lu(1)-N(6), 2.382(3); Selected bond angles (deg): C(1)-Lu(1)-N(3), 73.96(12); C(1)-Lu(1)-C(29), 150.88(14); C(1)-Lu(1)-C(57), 105.7(2).



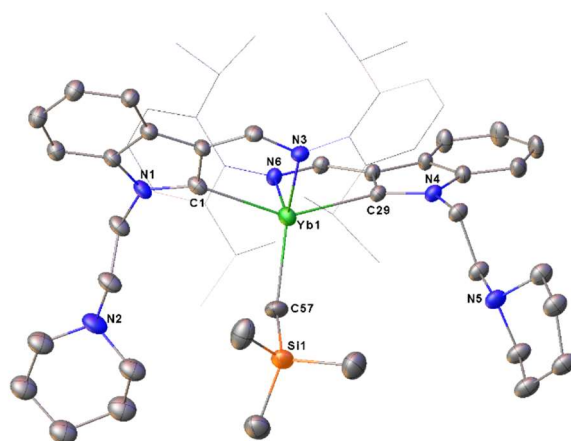

**Fig. S60.** Diagram of complex **2b** with 30% probability thermal ellipsoids. All hydrogen atoms were omitted and the diisopropylphenyl (Dipp) group was drawn in wireframe style for clarity. Selected bond lengths (Å): Yb(1)-C(1), 2.429(9); Yb(1)-C(29), 2.440(8); Yb(1)-C(57), 2.318(13); Yb(1)-N(3), 2.444(6); Yb(1)-N(6), 2.382(6); Selected bond angles (deg): C(1)-Yb(1)-N(3), 72.5(2); C(1)-Yb(1)-C(29), 148.5(3); C(1)-Yb(1)-C(57), 104.0(6).

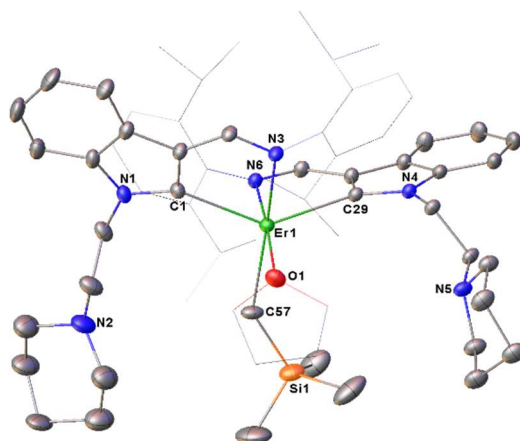

**Fig. S61.** Diagram of complex **2c** with 30% probability thermal ellipsoids. All hydrogen atoms were omitted and the diisopropylphenyl (Dipp) group and the carbon atoms of THF were drawn in wireframe style for clarity. Selected bond lengths (Å): Er(1)-C(1), 2.456(3); Er(1)-C(29), 2.442(3); Er(1)-C(57), 2.389(6); Er(1)-N(3), 2.606(3); Er(1)-N(6), 2.474(2); Er(1)-O(1), 2.385(3); Selected bond angles (deg): C(1)-Er(1)-N(3), 69.73(10); C(1)-Er(1)-C(29), 141.24(10); C(1)-Er(1)-C(57), 106.3(2).

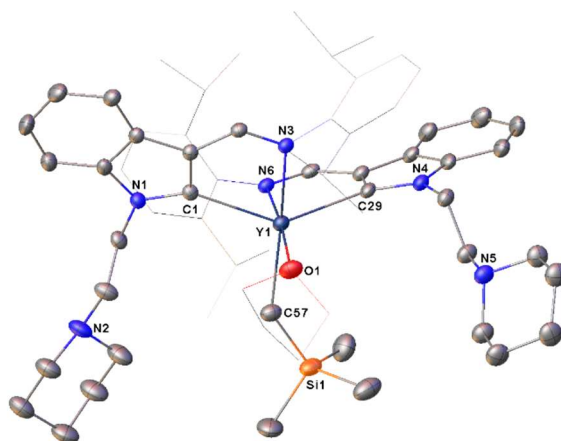

**Fig. S62.** Diagram of complex **2d** with 30% probability thermal ellipsoids. All hydrogen atoms were omitted and the diisopropylphenyl (Dipp) group and the carbon atoms of THF were drawn in wireframe style for clarity. Selected bond lengths (Å): Y(1)-C(1), 2.485(6); Y(1)-C(29), 2.488(5); Y(1)-C(57), 2.424(6); Y(1)-N(3), 2.634(5); Y(1)-N(6), 2.485(5); Y(1)-O(1), 2.403(4); Selected bond angles (deg): C(1)-Y(1)-N(3), 69.29(12); C(1)-Y(1)-C(29), 141.74(14); C(1)-Y(1)-C(57), 106.39(15).

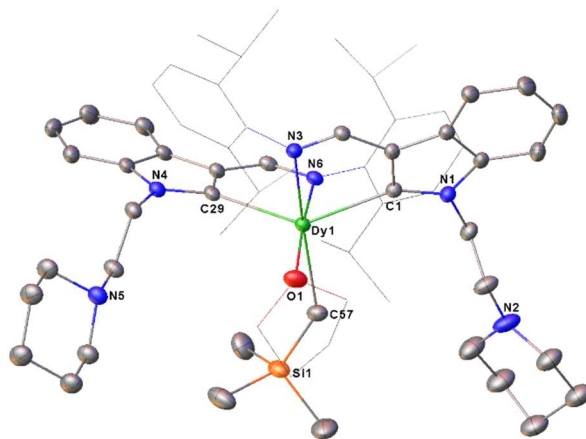

**Fig. S63.** Diagram of complex **2e** with 30% probability thermal ellipsoids. All hydrogen atoms were omitted and the diisopropylphenyl (Dipp) group and the carbon atoms of THF were drawn in wireframe style for clarity. Selected bond lengths (Å): Dy(1)-C(1), 2.500(4); Dy(1)-C(29), 2.502(4); Dy(1)-C(57), 2.435(4); Dy(1)-N(3), 2.653(3); Dy(1)-N(6), 2.493(3); Dy(1)-O(1), 2.385(3); Selected bond angles (deg): C(1)-Dy(1)-N(3), 69.54(11); C(1)-Dy(1)-C(29), 141.92(13); C(1)-Dy(1)-C(57), 106.31(15).

Diagrams of complexes **3a-3e**

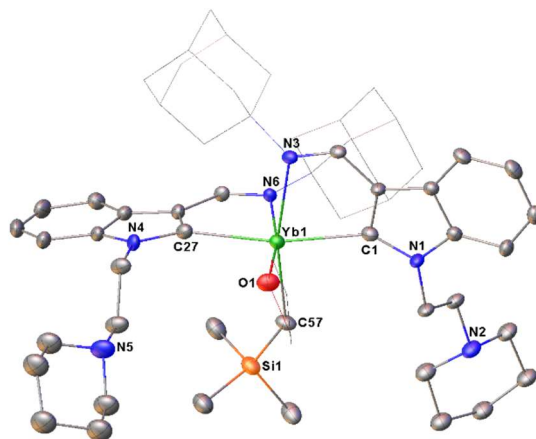

**Fig. S64.** Diagram of complex **3a** with 30% probability thermal ellipsoids. All hydrogen atoms were omitted and the adamantyl (Ad) group and the carbon atoms of THF were drawn in wireframe style for clarity. Selected bond lengths (Å): Yb(1)-C(1), 2.456(10); Yb(1)-C(27), 2.415(10); Yb(1)-C(57), 2.369(8); Yb(1)-N(3), 2.546(7); Yb(1)-N(6), 2.414(7); Yb(1)-O(1), 2.362(7); Selected bond angles (deg): C(1)-Yb(1)-N(3), 71.5(3); C(1)-Yb(1)-C(27), 168.0(3); C(1)-Yb(1)-C(57), 95.5(3).

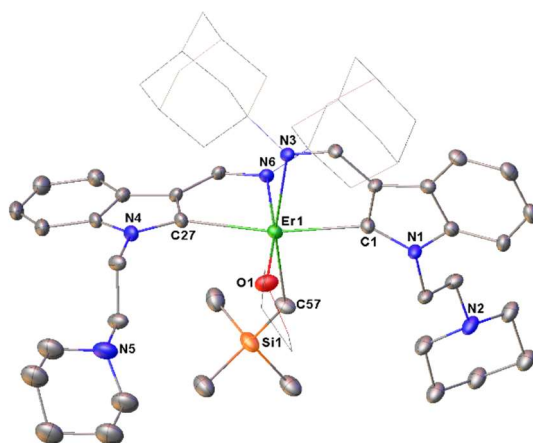

**Fig. S65.** Diagram of complex **3b** with 30% probability thermal ellipsoids. All hydrogen atoms were omitted and the adamantyl (Ad) group and the carbon atoms of THF were drawn in wireframe style for clarity. Selected bond lengths (Å): Er(1)-C(1), 2.474(8); Er(1)-C(27), 2.459(8); Er(1)-C(57), 2.354(10); Er(1)-N(3), 2.560(6); Er(1)-N(6), 2.435(6); Er(1)-O(1), 2.392(7); Selected bond angles (deg): C(1)-Er(1)-N(3), 70.5(2); C(1)-Er(1)-C(27), 167.7(3); C(1)-Er(1)-C(57), 95.8(4).

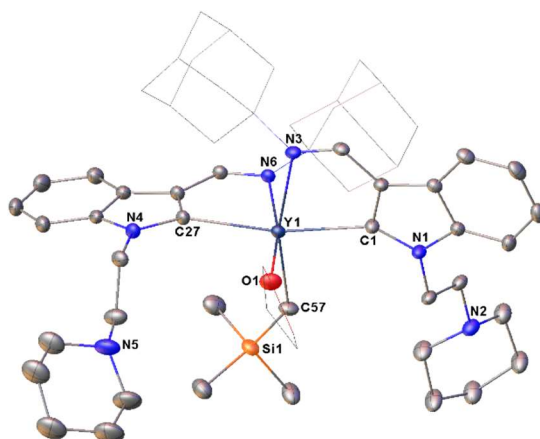

**Fig. S66.** Diagram of complex **3c** with 30% probability thermal ellipsoids. All hydrogen atoms were omitted and the adamantyl (Ad) group and the carbon atoms of THF were drawn in wireframe style for clarity. Selected bond lengths (Å): Y(1)-C(1), 2.490(4); Y(1)-C(27), 2.500(4); Y(1)-C(57), 2.412(3); Y(1)-N(3), 2.458(5); Y(1)-N(6), 2.591(3); Y(1)-O(1), 2.393(2); Selected bond angles (deg): C(1)-Y(1)-N(3), 73.11(15); C(1)-Y(1)-C(27), 166.45(12); C(1)-Y(1)-C(57), 98.66(14).

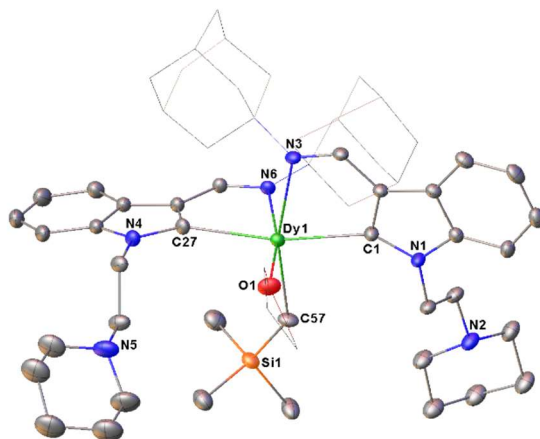

**Fig. S67.** Diagram of complex **3d** with 30% probability thermal ellipsoids. All hydrogen atoms were

omitted and the adamantyl (Ad) group and the carbon atoms of THF were drawn in wireframe style for clarity. Selected bond lengths (Å): Dy(1)-C(1), 2.507(4); Dy(1)-C(27), 2.491(4); Dy(1)-C(57), 2.419(4); Dy(1)-N(3), 2.607(3); Dy(1)-N(6), 2.470(3); Dy(1)-O(1), 2.419(3); Selected bond angles (deg): C(1)-Dy(1)-N(3), 69.60(12); C(1)-Dy(1)-C(27), 166.41(14); C(1)-Dy(1)-C(57), 94.81(16).

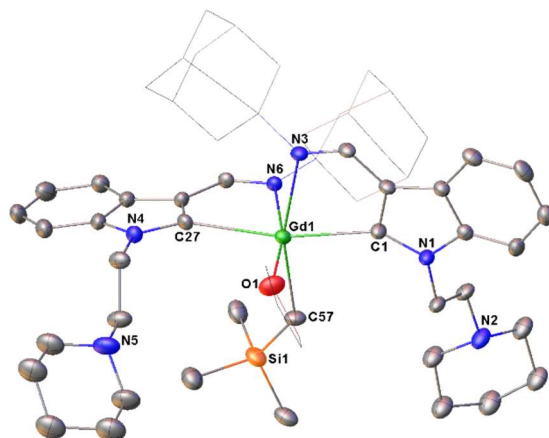

**Fig. S68.** Diagram of complex **3e** with 30% probability thermal ellipsoids. All hydrogen atoms were omitted and the adamantyl (Ad) group and the carbon atoms of THF were drawn in wireframe style for clarity. Selected bond lengths (Å): Gd(1)-C(1), 2.533(6); Gd(1)-C(27), 2.533(7); Gd(1)-C(57), 2.442(7); Gd(1)-N(3), 2.641(5); Gd(1)-N(6), 2.489(7); Gd(1)-O(1), 2.440(5); Selected bond angles (deg): C(1)-Gd(1)-N(3), 68.49(19); C(1)-Gd(1)-C(27), 165.7(2); C(1)-Gd(1)-C(57), 94.8(2).

Diagrams of complexes **4a-4d**

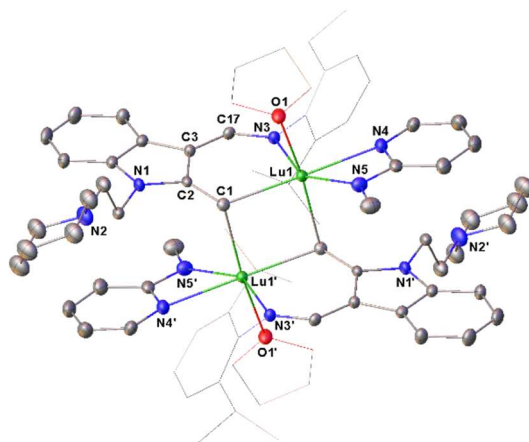

**Fig. S69.** Diagram of complex **4a** with 30% probability thermal ellipsoids. All hydrogen atoms were omitted and the diisopropylphenyl (Dipp) group and the carbon atoms of THF were drawn in wireframe style for clarity. Selected bond lengths (Å): Lu(1)-C(1), 2.393(5); Lu(1)-N(3), 2.330(5); Lu(1)-N(4), 2.432(5); Lu(1)-N(5), 2.299(5); Lu(1)-O(1), 2.367(4); C(1)-C(2), 1.385(7); C(2)-C(3), 1.463(8); C(3)-C(17), 1.374(7); C(17)-N(3), 1.330(7); Selected bond angles (deg): C(1)-Lu(1)-N(3), 84.85(17); C(1)-Lu(1)-N(4), 178.80(19); C(1)-Lu(1)-N(5), 125.0(2); C(1)-Lu(1)-O(1), 86.07(17).

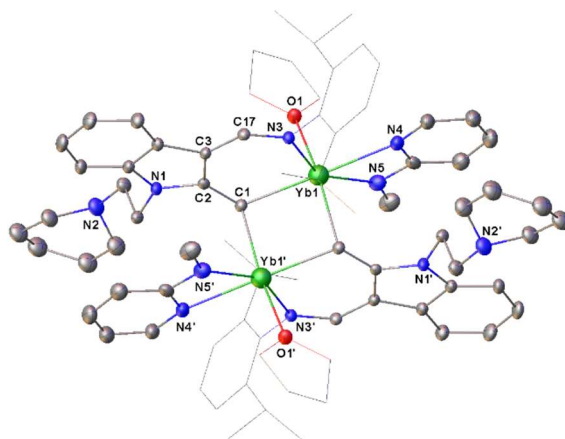

**Fig. S70.** Diagram of complex **4b** with 30% probability thermal ellipsoids. All hydrogen atoms were omitted and the diisopropylphenyl (Dipp) group and the carbon atoms of THF were drawn in wireframe style for clarity. Selected bond lengths (Å): Yb(1)-C(1), 2.402(5); Yb(1)-N(3), 2.347(4); Yb(1)-N(4), 2.450(5); Yb(1)-N(5), 2.328(5); Yb(1)-O(1), 2.384(4); C(1)-C(2), 1.384(7); C(2)-C(3), 1.459(7); C(3)-C(17), 1.377(7); C(17)-N(3), 1.331(6); Selected bond angles (deg): C(1)-Yb(1)-N(3), 84.14(15); C(1)-Yb(1)-N(4), 178.75(18); C(1)-Yb(1)-N(5), 125.51(19); C(1)-Yb(1)-O(1), 85.99(15).

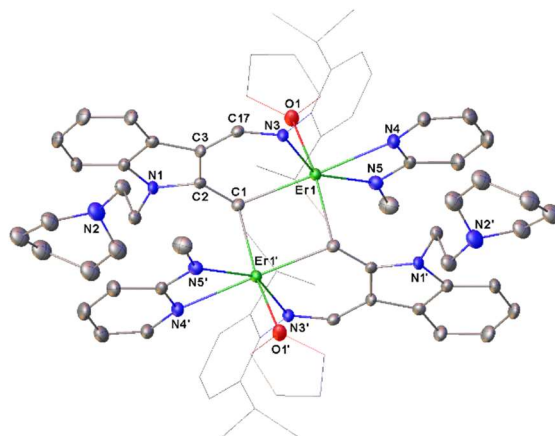

**Fig. S71.** Diagram of complex **4c** with 30% probability thermal ellipsoids. All hydrogen atoms were omitted and the diisopropylphenyl (Dipp) group and the carbon atoms of THF were drawn in wireframe style for clarity. Selected bond lengths (Å): Er(1)-C(1), 2.404(6); Er(1)-N(3), 2.352(5); Er(1)-N(4), 2.470(5); Er(1)-N(5), 2.324(6); Er(1)-O(1), 2.399(5); C(1)-C(2), 1.375(8); C(2)-C(3), 1.466(8); C(3)-C(17), 1.373(8); C(17)-N(3), 1.336(7); Selected bond angles (deg): C(1)-Er(1)-N(3), 83.08(19); C(1)-Er(1)-N(4), 177.7(2); C(1)-Er(1)-N(5), 126.6(2); C(1)-Er(1)-O(1), 85.35(19).

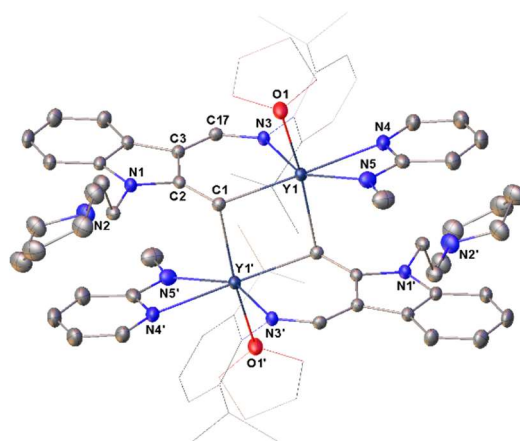

**Fig. S72.** Diagram of complex **4d** with 30% probability thermal ellipsoids. All hydrogen atoms were omitted and the diisopropylphenyl (Dipp) group and the carbon atoms of THF were drawn in wireframe style for clarity. Selected bond lengths (Å): Y(1)-C(1), 2.446(4); Y(1)-N(3), 2.374(4); Y(1)-N(4), 2.486(4); Y(1)-N(5), 2.350(4); Y(1)-O(1), 2.401(3); C(1)-C(2), 1.376(6); C(2)-C(3), 1.456(6); C(3)-C(17), 1.366(6); C(17)-N(3), 1.342(5); Selected bond angles (deg): C(1)-Y(1)-N(3), 82.59(13); C(1)-Y(1)-N(4), 177.75(15); C(1)-Y(1)-N(5), 127.36(16); C(1)-Y(1)-O(1), 85.66(13). Diagrams of complexes **5a-5d**

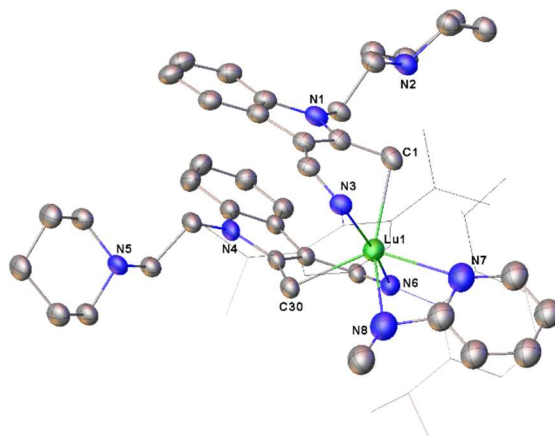

**Fig. S73.** Diagram of complex **5a** with 30% probability thermal ellipsoids. All hydrogen atoms were omitted and the diisopropylphenyl (Dipp) group was drawn in wireframe style for clarity. Selected bond lengths (Å): Lu(1)-C(1), 2.457(15); Lu(1)-C(30), 2.406(13); Lu(1)-N(3), 2.404(11); Lu(1)-N(6), 2.395(11); Lu(1)-N(7), 2.39(3); Lu(1)-N(8), 2.31(2); Selected bond angles (deg): C(1)-Lu(1)-N(3), 78.6(4); C(1)-Lu(1)-C(30), 119.4(5); C(1)-Lu(1)-N(6), 95.9(4); C(1)-Lu(1)-N(7), 86.2(7); C(1)-Lu(1)-N(8), 141.8(7).

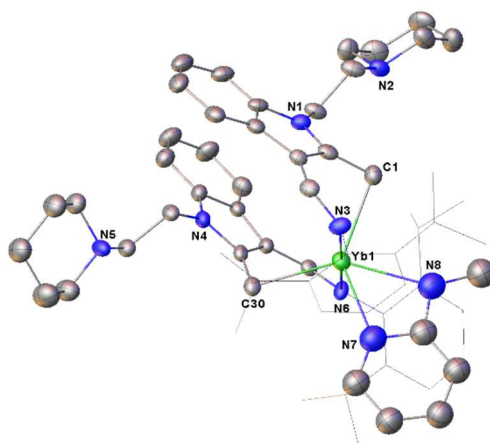

**Fig. S74.** Diagram of complex **5b** with 30% probability thermal ellipsoids. All hydrogen atoms were omitted and the diisopropylphenyl (Dipp) group was drawn in wireframe style for clarity. Selected bond lengths (Å): Yb(1)-C(1), 2.495(9); Yb(1)-C(30), 2.507(8); Yb(1)-N(3), 2.413(7); Yb(1)-N(6), 2.424(6); Yb(1)-N(7), 2.526(16); Yb(1)-N(8), 2.433(12); Selected bond angles (deg): C(1)-Yb(1)-N(3), 77.4(3); C(1)-Yb(1)-C(30), 123.9(3); C(1)-Yb(1)-N(6), 99.1(3); C(1)-Yb(1)-N(7), 136.9(5); C(1)-Yb(1)-N(8), 85.5(4).

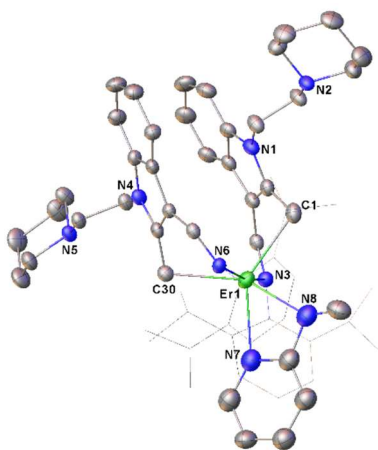

**Fig. S75.** Diagram of complex **5c** with 30% probability thermal ellipsoids. All hydrogen atoms were omitted and the diisopropylphenyl (Dipp) group was drawn in wireframe style for clarity. Selected bond lengths (Å): Er(1)-C(1), 2.469(8); Er(1)-C(30), 2.461(7); Er(1)-N(3), 2.431(5); Er(1)-N(6), 2.430(5); Er(1)-N(7), 2.433(11); Er(1)-N(8), 2.327(17); Selected bond angles (deg): C(1)-Er(1)-N(3), 78.2(2); C(1)-Er(1)-C(30), 119.7(3); C(1)-Er(1)-N(6), 96.3(2); C(1)-Er(1)-N(7), 141.4(4); C(1)-Er(1)-N(8), 87.5(5).



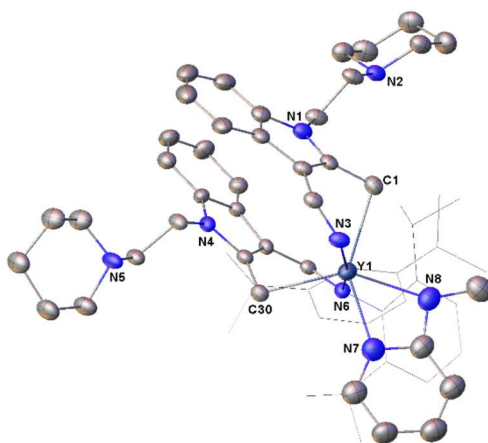

**Fig. S76.** Diagram of complex **5d** with 30% probability thermal ellipsoids. All hydrogen atoms were omitted and the diisopropylphenyl (Dipp) group was drawn in wireframe style for clarity. Selected bond lengths (Å): Y(1)-C(1), 2.484(6); Y(1)-C(30), 2.487(6); Y(1)-N(3), 2.431(5); Y(1)-N(6), 2.449(4); Y(1)-N(7), 2.384(9); Y(1)-N(8), 2.354(12); Selected bond angles (deg): C(1)-Y(1)-N(3), 77.72(19); C(1)-Y(1)-C(30), 119.4(2); C(1)-Y(1)-N(6), 96.27(18); C(1)-Y(1)-N(7), 143.4(4); C(1)-Y(1)-N(8), 91.3(4).

Diagrams of complexes **6a-6d**

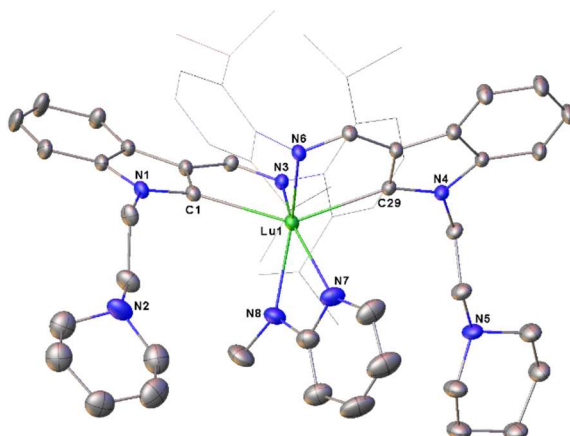

**Fig. S77.** Diagram of complex **6a** with 30% probability thermal ellipsoids. All hydrogen atoms were omitted and the diisopropylphenyl (Dipp) group was drawn in wireframe style for clarity. Selected bond lengths (Å): Lu(1)-C(1), 2.435(4); Lu(1)-C(29), 2.430(4); Lu(1)-N(3), 2.385(3); Lu(1)-N(6), 2.402(3); Lu(1)-N(7), 2.411(5); Lu(1)-N(8), 2.261(5); Selected bond angles (deg): C(1)-Lu(1)-N(3), 72.64(12); C(1)-Lu(1)-C(29), 143.50(13); C(1)-Lu(1)-N(6), 86.85(13); C(1)-Lu(1)-N(7), 129.70(17); C(1)-Lu(1)-N(8), 95.12(17).



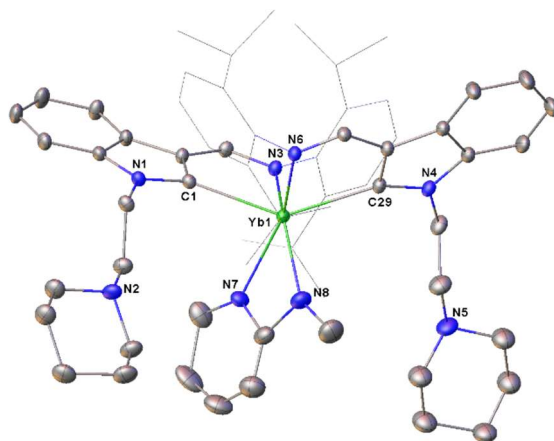

**Fig. S78.** Diagram of complex **6b** with 30% probability thermal ellipsoids. All hydrogen atoms were omitted and the diisopropylphenyl (Dipp) group was drawn in wireframe style for clarity. Selected bond lengths (Å): Yb(1)-C(1), 2.442(4); Yb(1)-C(29), 2.450(4); Yb(1)-N(3), 2.430(3); Yb(1)-N(6), 2.404(3); Yb(1)-N(7), 2.427(5); Yb(1)-N(8), 2.266(5); Selected bond angles (deg): C(1)-Yb(1)-N(3), 72.64(11); C(1)-Yb(1)-C(29), 141.92(12); C(1)-Yb(1)-N(6), 86.65(11); C(1)-Yb(1)-N(7), 81.74(16); C(1)-Yb(1)-N(8), 121.1(2).

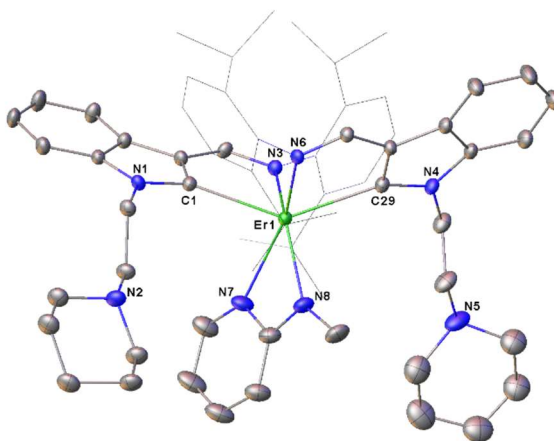

**Fig. S79.** Diagram of complex **6c** with 30% probability thermal ellipsoids. All hydrogen atoms were omitted and the diisopropylphenyl (Dipp) group was drawn in wireframe style for clarity. Selected bond lengths (Å): Er(1)-C(1), 2.463(6); Er(1)-C(29), 2.481(6); Er(1)-N(3), 2.456(5); Er(1)-N(6), 2.424(5); Er(1)-N(7), 2.454(7); Er(1)-N(8), 2.295(7); Selected bond angles (deg): C(1)-Er(1)-N(3), 72.54(18); C(1)-Er(1)-C(29), 141.0(2); C(1)-Er(1)-N(6), 86.40(18); C(1)-Er(1)-N(7), 82.6(2); C(1)-Er(1)-N(8), 120.4(2).

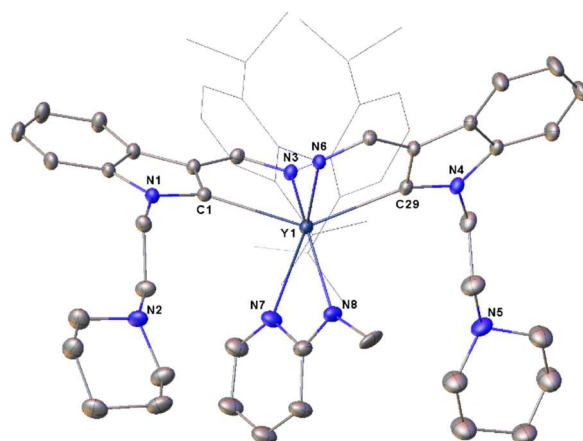

**Fig. S80.** Diagram of complex **6d** with 30% probability thermal ellipsoids. All hydrogen atoms were omitted and the diisopropylphenyl (Dipp) group was drawn in wireframe style for clarity. Selected bond lengths (Å): Y(1)-C(1), 2.480(2); Y(1)-C(29), 2.488(2); Y(1)-N(3), 2.455(2); Y(1)-N(6), 2.440(2); Y(1)-N(7), 2.440(10); Y(1)-N(8), 2.289(11); Selected bond angles (deg): C(1)-Y(1)-N(3), 72.23(7); C(1)-Y(1)-C(29), 140.67(8); C(1)-Y(1)-N(6), 86.31(7); C(1)-Y(1)-N(7), 87.0(4); C(1)-Y(1)-N(8), 121.6(6).

Diagrams of complexes **7a-7b**

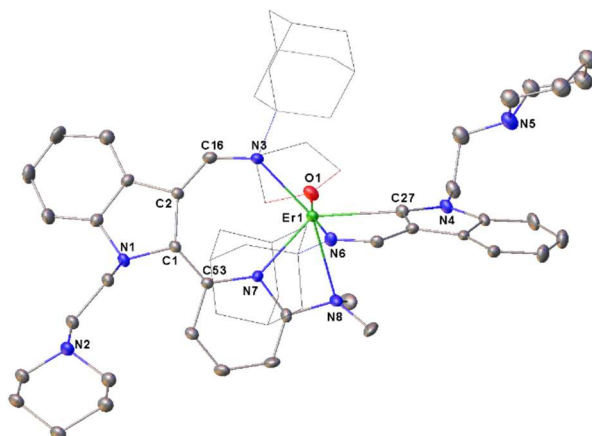

**Fig. S81.** Diagram of complex **7a** with 30% probability thermal ellipsoids. All hydrogen atoms were omitted and the adamantyl (Ad) group and the carbon atoms of THF were drawn in wireframe style for clarity. Selected bond lengths (Å): Er(1)-C(27), 2.515(9); Er(1)-N(3), 2.252(7); Er(1)-N(6), 2.415(7); Er(1)-N(7), 2.297(7); Er(1)-N(8), 2.562(7); Er(1)-O(1), 2.408(6); C(1)-C(2), 1.498(12); C(1)-C(53), 1.360(11); C(2)-C(16), 1.367(12); C(16)-N(3), 1.383(11); Selected bond angles (deg): C(27)-Er(1)-N(3), 128.8(3); C(27)-Er(1)-N(6), 73.8(6); C(27)-Er(1)-N(7), 135.6(3); C(27)-Er(1)-N(8), 79.6(3); C(27)-Er(1)-O(1), 95.0(3); C(1)-C(53)-N(7), 123.8(8); C(2)-C(1)-C(53), 134.6(8); C(16)-C(2)-C(1), 136.9(8).

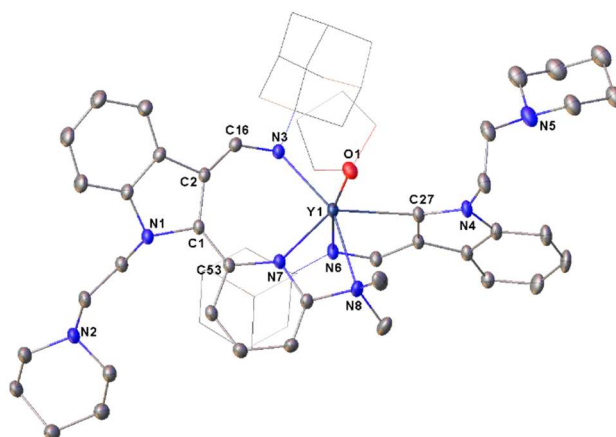

**Fig. S82.** Diagram of complex **7b** with 30% probability thermal ellipsoids. All hydrogen atoms were omitted and the adamantyl (Ad) group and the carbon atoms of THF were drawn in wireframe style for clarity. Selected bond lengths (Å): Y(1)-C(27), 2.507(3); Y(1)-N(3), 2.250(3); Y(1)-N(6), 2.428(3); Y(1)-N(7), 2.296(3); Y(1)-N(8), 2.549(3); Y(1)-O(1), 2.412(2); C(1)-C(2), 1.470(5); C(1)-C(53), 1.362(5); C(2)-C(16), 1.363(5); C(16)-N(3), 1.373(4); Selected bond angles (deg): C(27)-Y(1)-N(3), 129.01(11); C(27)-Y(1)-N(6), 73.53(10); C(27)-Y(1)-N(7), 135.53(12); C(27)-Y(1)-N(8), 80.10(11); C(27)-Y(1)-O(1), 94.95(10); C(1)-C(53)-N(7), 122.8(3); C(2)-C(1)-C(53), 135.6(3); C(16)-C(2)-C(1), 136.8(3).

Diagrams of complexes **8-9**

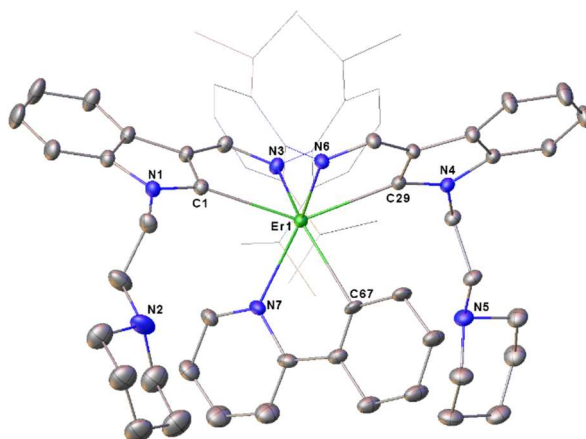

**Fig. S83.** Diagram of complex **8a** with 30% probability thermal ellipsoids. All hydrogen atoms were omitted and the diisopropylphenyl (Dipp) group was drawn in wireframe style for clarity. Selected bond lengths (Å): Er(1)-C(1), 2.472(3); Er(1)-C(29), 2.466(3); Er(1)-C(67), 2.544(19); Er(1)-N(3), 2.444(2); Er(1)-N(6), 2.440(2); Er(1)-N(7), 2.381(16); Selected bond angles (deg): C(1)-Er(1)-N(3), 72.10(8); C(1)-Er(1)-C(29), 140.46(9); C(1)-Er(1)-C(67), 132.6(4); C(1)-Er(1)-N(6), 86.14(18); C(1)-Er(1)-N(7), 84.2(4).

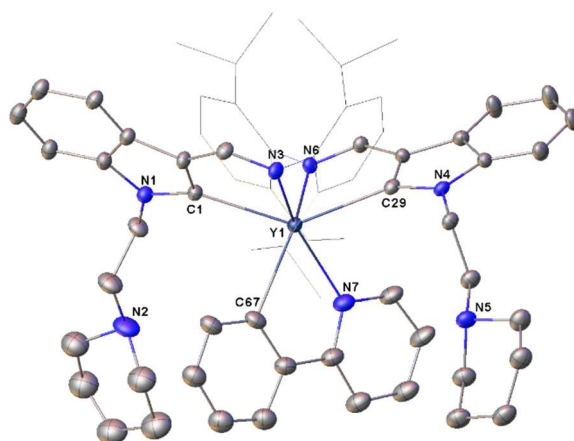

**Fig. S84.** Diagram of complex **8b** with 30% probability thermal ellipsoids. All hydrogen atoms were omitted and the diisopropylphenyl (Dipp) group was drawn in wireframe style for clarity. Selected bond lengths (Å): Y(1)-C(1), 2.487(6); Y(1)-C(29), 2.477(6); Y(1)-C(67), 2.53(3); Y(1)-N(3), 2.460(5); Y(1)-N(6), 2.439(4); Y(1)-N(7), 2.40(3); Selected bond angles (deg): C(1)-Y(1)-N(3), 71.47(18); C(1)-Y(1)-C(29), 140.66(19); C(1)-Y(1)-C(67), 86.0(7); C(1)-Y(1)-N(6), 86.98(17); C(1)-Y(1)-N(7), 86.4(5).

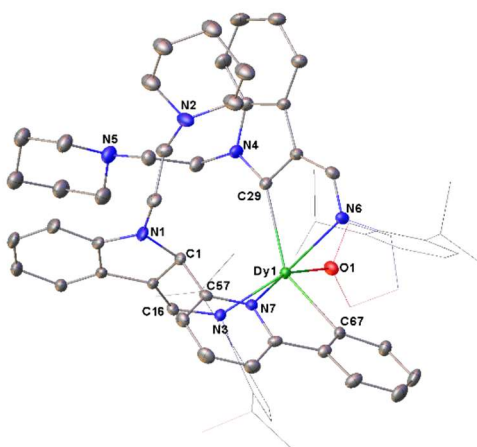

**Fig. S85.** Diagram of complex **9** with 30% probability thermal ellipsoids. All hydrogen atoms were omitted and the diisopropylphenyl (Dipp) group and the carbon atoms of THF were drawn in wireframe style for clarity. Selected bond lengths (Å): Dy(1)-C(29), 2.575(5); Dy(1)-C(67), 2.462(5); Dy(1)-N(3), 2.333(4); Dy(1)-N(6), 2.596(4); Dy(1)-N(7), 2.428(4); Dy(1)-O(1), 2.370(4); C(1)-C(57), 1.523(7); C(1)-N(1), 1.460(6); C(16)-N(3), 1.357(6); Selected bond angles (deg): C(29)-Dy(1)-C(67), 147.31(17); C(29)-Dy(1)-N(7), 112.61(16); C(29)-Dy(1)-N(6), 68.31(16); C(1)-C(57)-N(7), 116.0(5); N(1)-C(1)-C(57), 112.1(5).

Diagrams of complexes **10-11**

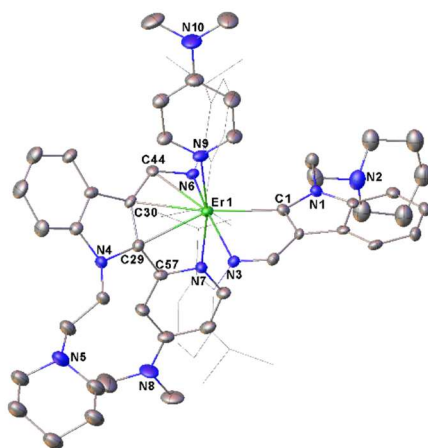

**Fig. S86.** Diagram of complex **10a** with 30% probability thermal ellipsoids. All hydrogen atoms were omitted and the diisopropylphenyl (Dipp) group was drawn in wireframe style for clarity. Selected bond lengths (Å): Er(1)-C(1), 2.461(8); Er(1)-C(29), 2.530(8); Er(1)-C(30), 2.616(8); Er(1)-C(44), 2.588(8); Er(1)-N(3), 2.550(6); Er(1)-N(6), 2.230(6); Er(1)-N(7), 2.350(6); Er(1)-N(9), 2.440(7); C(29)-C(30), 1.485(11); C(29)-C(57), 1.479(10); C(30)-C(44), 1.367(10); C(44)-N(6), 1.380(9); Selected bond angles (deg): C(1)-Er(1)-N(3), 70.3(2); C(1)-Er(1)-C(29), 153.1(3); C(1)-Er(1)-C(30), 162.3(3); C(1)-Er(1)-C(44), 133.1(3); C(1)-Er(1)-N(6), 102.4(3); C(1)-Er(1)-N(7), 83.6(2); C(1)-Er(1)-N(9), 97.7(2).

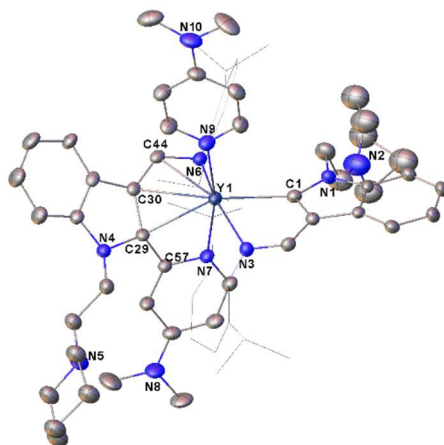

**Fig. S87.** Diagram of complex **10b** with 30% probability thermal ellipsoids. All hydrogen atoms were omitted and the diisopropylphenyl (Dipp) group was drawn in wireframe style for clarity. Selected bond lengths (Å): Y(1)-C(1), 2.465(6); Y(1)-C(29), 2.565(6); Y(1)-C(30), 2.656(6); Y(1)-C(44), 2.597(6); Y(1)-N(3), 2.568(5); Y(1)-N(6), 2.229(5); Y(1)-N(7), 2.376(5); Y(1)-N(9), 2.459(5); C(29)-C(30), 1.491(8); C(29)-C(57), 1.468(8); C(30)-C(44), 1.386(8); C(44)-N(6), 1.392(7); Selected bond angles (deg): C(1)-Y(1)-N(3), 70.98(19); C(1)-Y(1)-C(29), 151.78(18); C(1)-Y(1)-C(30), 159.0(2); C(1)-Y(1)-C(44), 130.4(2); C(1)-Y(1)-N(6), 98.9(2); C(1)-Y(1)-N(7), 95.34(18); C(1)-Y(1)-N(9), 97.1(2).

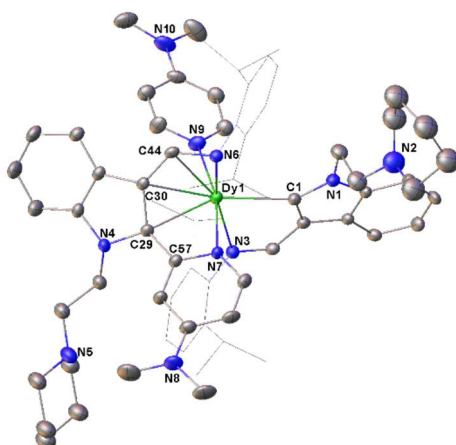

**Fig. S88.** Diagram of complex **10c** with 30% probability thermal ellipsoids. All hydrogen atoms were omitted and the diisopropylphenyl (Dipp) group was drawn in wireframe style for clarity. Selected bond lengths (Å): Dy(1)-C(1), 2.469(6); Dy(1)-C(29), 2.586(6); Dy(1)-C(30), 2.664(6); Dy(1)-C(44), 2.588(6); Dy(1)-N(3), 2.571(5); Dy(1)-N(6), 2.229(5); Dy(1)-N(7), 2.368(5); Dy(1)-N(9), 2.471(6); C(29)-C(30), 1.497(8); C(29)-C(57), 1.472(8); C(30)-C(44), 1.379(8); C(44)-N(6), 1.395(8); Selected bond angles (deg): C(1)-Dy(1)-N(3), 70.8(2); C(1)-Dy(1)-C(29), 151.05(19); C(1)-Dy(1)-C(30), 158.3(2); C(1)-Dy(1)-C(44), 130.1(2); C(1)-Dy(1)-N(6), 98.4(2); C(1)-Dy(1)-N(7), 94.79(19); C(1)-Dy(1)-N(9), 98.0(2).

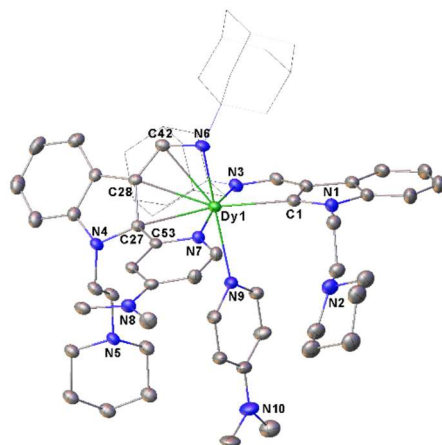

**Fig. S89.** Diagram of complex **11** with 30% probability thermal ellipsoids. All hydrogen atoms were omitted and the adamantyl (Ad) group was drawn in wireframe style for clarity. Selected bond lengths (Å): Dy(1)-C(1), 2.501(5); Dy(1)-C(27), 2.586(4); Dy(1)-C(28), 2.655(6); Dy(1)-C(42), 2.584(4); Dy(1)-N(3), 2.485(3); Dy(1)-N(6), 2.234(3); Dy(1)-N(7), 2.404(3); Dy(1)-N(9), 2.534(4); C(27)-C(28), 1.500(5); C(27)-C(53), 1.459(5); C(28)-C(42), 1.385(5); C(42)-N(6), 1.375(5); Selected bond angles (deg): C(1)-Dy(1)-N(3), 70.90(14); C(1)-Dy(1)-C(27), 162.84(14); C(1)-Dy(1)-C(28), 156.14(13); C(1)-Dy(1)-C(42), 125.53(14); C(1)-Dy(1)-N(6), 97.06(14); C(1)-Dy(1)-N(7), 106.11(14); C(1)-Dy(1)-N(9), 81.85(13).

Diagrams of complexes **12-13**

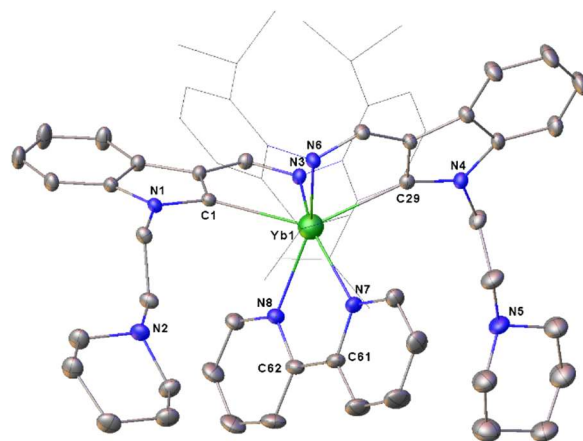

**Fig. S90.** Diagram of complex **12a** with 30% probability thermal ellipsoids. All hydrogen atoms were omitted and the diisopropylphenyl (Dipp) group was drawn in wireframe style for clarity. Selected bond lengths (Å): Yb(1)-C(1), 2.433(3); Yb(1)-C(29), 2.445(3); Yb(1)-N(3), 2.423(2); Yb(1)-N(6), 2.421(2); Yb(1)-N(7), 2.330(3); Yb(1)-N(8), 2.358(3); C(61)-C(62), 1.414(5); Selected bond angles (deg): C(1)-Yb(1)-C(29), 140.10(10); C(1)-Yb(1)-N(3), 72.54(9); C(1)-Yb(1)-N(6), 85.76(9); C(1)-Yb(1)-N(7), 130.12(10); C(1)-Yb(1)-N(8), 82.31(10).

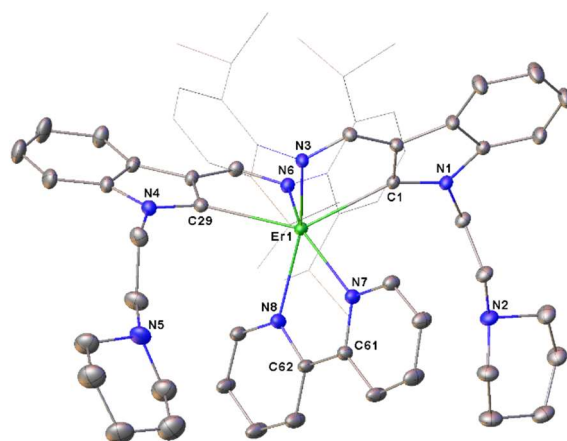

**Fig. S91.** Diagram of complex **12b** with 30% probability thermal ellipsoids. All hydrogen atoms were omitted and the diisopropylphenyl (Dipp) group was drawn in wireframe style for clarity. Selected bond lengths (Å): Er(1)-C(1), 2.459(3); Er(1)-C(29), 2.465(3); Er(1)-N(3), 2.439(3); Er(1)-N(6), 2.432(3); Er(1)-N(7), 2.382(7); Er(1)-N(8), 2.349(7); C(61)-C(62), 1.413(8); Selected bond angles (deg): C(1)-Er(1)-C(29), 139.61(11); C(1)-Er(1)-N(3), 71.89(9); C(1)-Er(1)-N(6), 85.84(10); C(1)-Er(1)-N(7), 81.2(3); C(1)-Er(1)-N(8), 129.1(2).

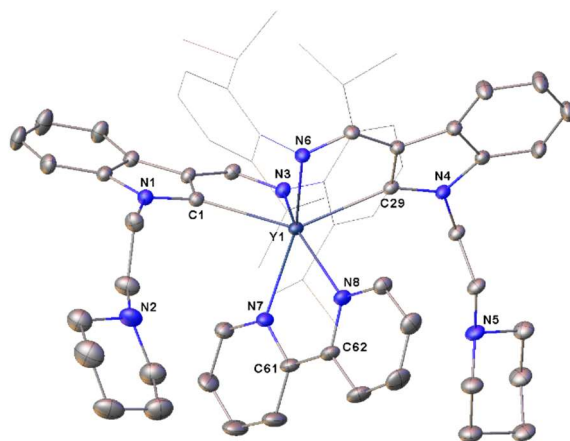

**Fig. S92.** Diagram of complex **12c** with 30% probability thermal ellipsoids. All hydrogen atoms were omitted and the diisopropylphenyl (Dipp) group was drawn in wireframe style for clarity. Selected bond lengths (Å): Y(1)-C(1), 2.492(4); Y(1)-C(29), 2.476(4); Y(1)-N(3), 2.453(3); Y(1)-N(6), 2.454(3); Y(1)-N(7), 2.365(3); Y(1)-N(8), 2.393(3); C(61)-C(62), 1.412(6); Selected bond angles (deg): C(1)-Y(1)-C(29), 139.56(11); C(1)-Y(1)-N(3), 71.54(11); C(1)-Y(1)-N(6), 85.86(11); C(1)-Y(1)-N(7), 86.58(11); C(1)-Y(1)-N(8), 133.80(11).

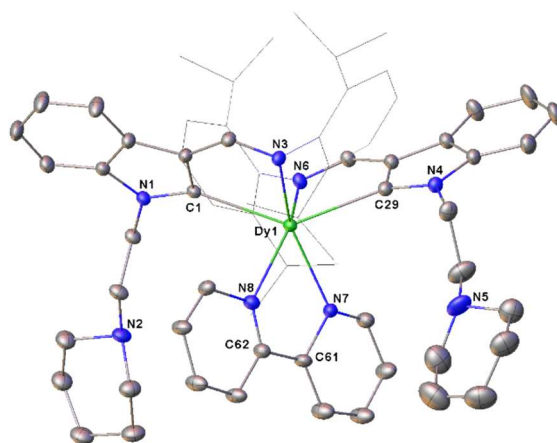

**Fig. S93.** Diagram of complex **12d** with 30% probability thermal ellipsoids. All hydrogen atoms were omitted and the diisopropylphenyl (Dipp) group was drawn in wireframe style for clarity. Selected bond lengths (Å): Dy(1)-C(1), 2.487(3); Dy(1)-C(29), 2.495(3); Dy(1)-N(3), 2.461(2); Dy(1)-N(6), 2.458(2); Dy(1)-N(7), 2.370(9); Dy(1)-N(8), 2.406(9); C(61)-C(62), 1.407(9); Selected bond angles (deg): C(1)-Dy(1)-C(29), 139.39(9); C(1)-Dy(1)-N(3), 71.56(8); C(1)-Dy(1)-N(6), 86.21(8); C(1)-Dy(1)-N(7), 132.5(3); C(1)-Dy(1)-N(8), 83.9(5).



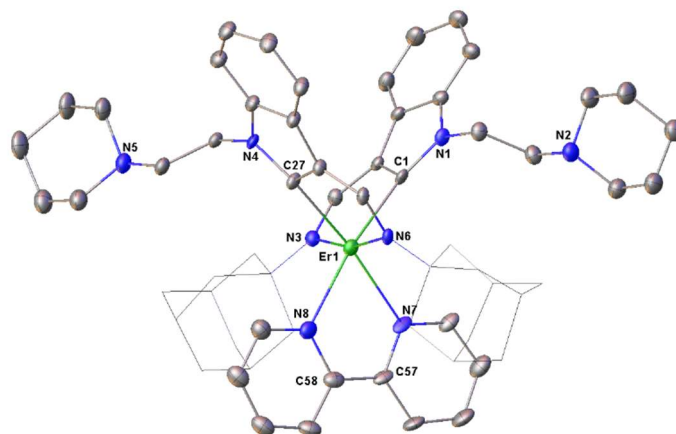

**Fig. S94.** Diagram of complex **13** with 30% probability thermal ellipsoids. All hydrogen atoms were omitted and the adamantyl (Ad) group was drawn in wireframe style for clarity. Selected bond lengths (Å): Er(1)-C(1), 2.378(14); Er(1)-C(27), 2.402(13); Er(1)-N(3), 2.463(11); Er(1)-N(6), 2.441(10); Er(1)-N(7), 2.352(11); Er(1)-N(8), 2.365(13); C(57)-C(58), 1.41(2); Selected bond angles (deg): C(1)-Er(1)-C(27), 91.3(5); C(1)-Er(1)-N(3), 73.3(4); C(1)-Er(1)-N(6), 98.7(4); C(1)-Er(1)-N(7), 100.1(4); C(1)-Er(1)-N(8), 167.3(4).

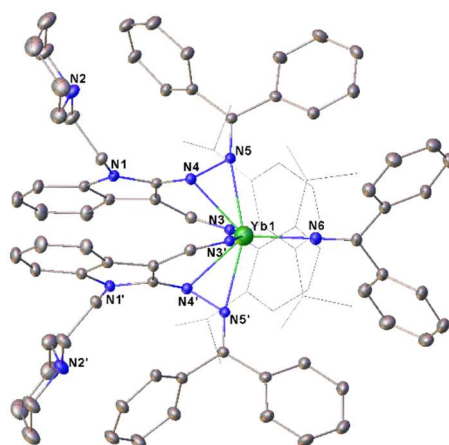

#### Diagrams of complexes **14a-14c**

**Fig. S95.** Diagram of complex **14a** with 30% probability thermal ellipsoids. All hydrogen atoms were omitted and the diisopropylphenyl (Dipp) group was drawn in wireframe style for clarity. Selected bond lengths (Å): Yb(1)-N(3), 2.480(3); Yb(1)-N(4), 2.338(2); Yb(1)-N(5), 2.398(2); Yb(1)-N(6), 2.172(4); Selected bond angles (deg): N(3)-Yb(1)-N(4), 81.69(8); N(3)-Yb(1)-N(5), 75.87(8); N(3)-Yb(1)-N(6), 99.81(5).

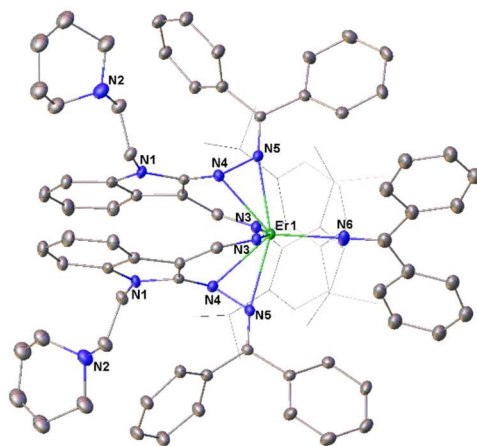

**Fig. S96.** Diagram of complex **14b** with 30% probability thermal ellipsoids. All hydrogen atoms were omitted and the diisopropylphenyl (Dipp) group was drawn in wireframe style for clarity. Selected bond lengths (Å): Er(1)-N(3), 2.475(5); Er(1)-N(4), 2.364(5); Er(1)-N(5), 2.421(5); Er(1)-N(6), 2.221(8); Selected bond angles (deg): N(3)-Er(1)-N(4), 81.55(16); N(3)-Er(1)-N(5), 75.44(16); N(3)-Er(1)-N(6), 100.02(11).

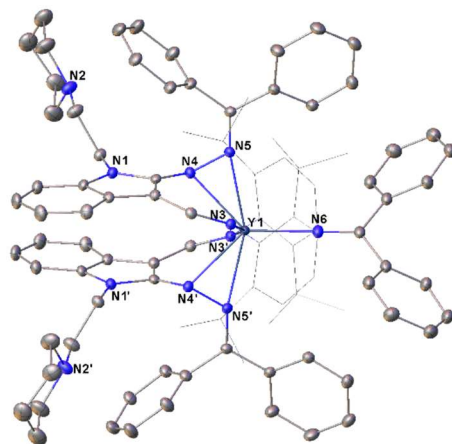

**Fig. S97.** Diagram of complex **14c** with 30% probability thermal ellipsoids. All hydrogen atoms were omitted and the diisopropylphenyl (Dipp) group was drawn in wireframe style for clarity. Selected bond lengths (Å): Y(1)-N(3), 2.488(3); Y(1)-N(4), 2.393(3); Y(1)-N(5), 2.427(3); Y(1)-N(6), 2.193(5); Selected bond angles (deg): N(3)-Y(1)-N(4), 81.17(9); N(3)-Y(1)-N(5), 75.03(9); N(3)-Y(1)-N(6), 99.96(6).

## 6. Electron Paramagnetic Resonance and UV/vis Absorption Spectra

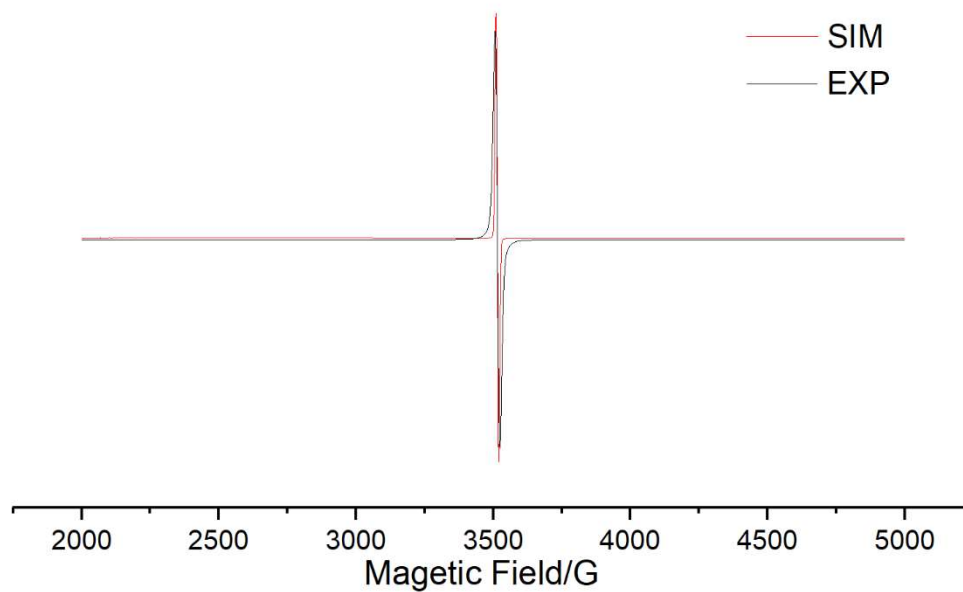

**Fig. S98.** Continuous-wave X-Band EPR spectrum (perpendicular mode) of **12c** (298 K)

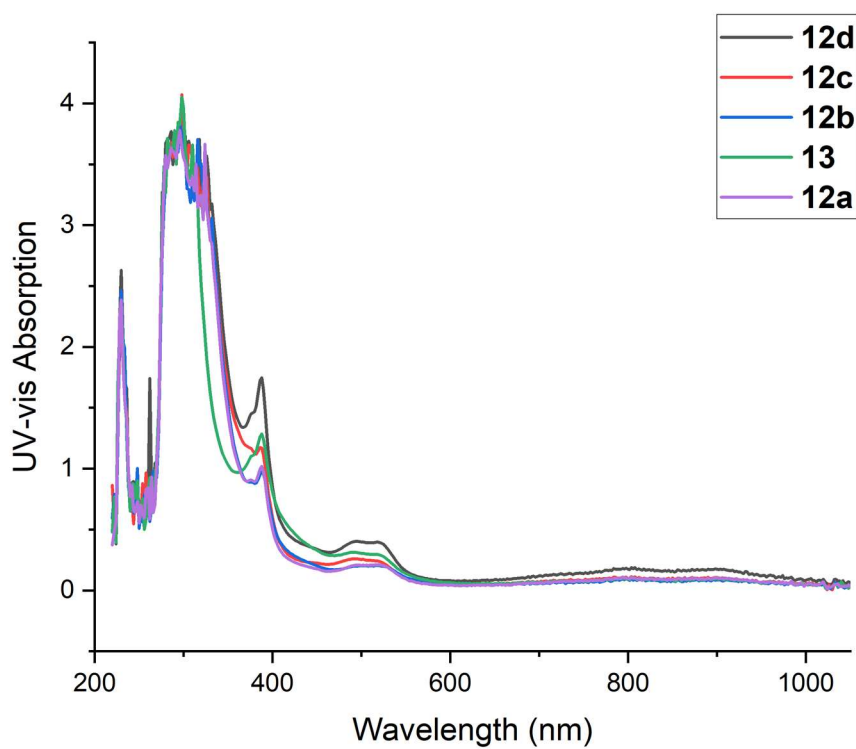

**Fig. S99.** UV/vis absorption spectrum of complexes **12-13** (298 K, 0.30 mM/L in THF)

## 7. GC-MS

66604 #776 RT: 5.64 AV: 1 NL: 1.30E5  
T: + c EI Full ms [50.00-450.00]

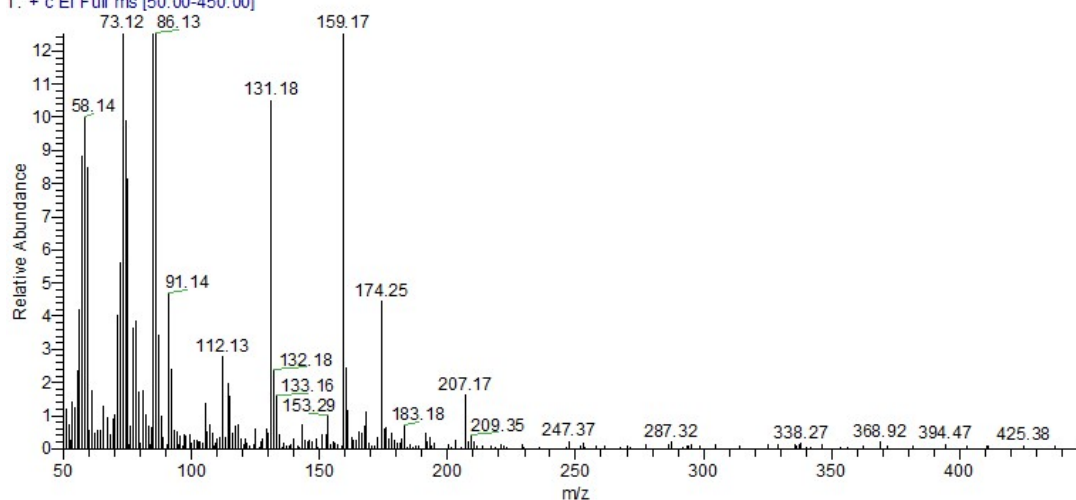

**Fig. S100.** GC-MS (EI) analyses of the coupling product  $(\text{Me}_3\text{SiCH}_2)_2$  from the hydrolysis of reaction mixtures of the corresponding reactions in the formation of **12c**.

## 8. Tables of Crystal Data and Structure Refinement

**Table S22.** Selected bond lengths (Å) and angles (deg) for the indolyl rare-earth metal alkyl complexes **1-3**

| Compd (RE)     | RE-C(1)   | RE-C(29) | RE-C(27)  | RE-C(37)  | RE-C(41)  | RE-C(57)  | RE-N(3)   | RE-N(6)  |
|----------------|-----------|----------|-----------|-----------|-----------|-----------|-----------|----------|
| <b>1a</b> (Lu) | 2.432(5)  | /        | /         | 2.370(6)  | 2.345(6)  | /         | 2.541(10) |          |
| <b>1b</b> (Yb) | 2.445(9)  | /        | /         | 2.378(10) | 2.361(10) | /         | 2.599(7)  |          |
| <b>1c</b> (Er) | 2.472(8)  | /        | /         | 2.387(8)  | 2.380(8)  | /         | 2.617(6)  |          |
| <b>1d</b> (Y)  | 2.469(6)  | /        | /         | 2.393(7)  | 2.382(6)  | /         | 2.606(5)  |          |
| <b>1e</b> (Dy) | 2.498(10) | /        | /         | 2.427(11) | 2.399(11) | /         | 2.626(8)  |          |
| <b>2a</b> (Lu) | 2.421(4)  | 2.417(4) | /         | /         | /         | 2.285(6)  | 2.339(3)  | 2.382(3) |
| <b>2b</b> (Yb) | 2.429(9)  | 2.440(8) | /         | /         | /         | 2.318(13) | 2.444(6)  | 2.382(6) |
| <b>2c</b> (Er) | 2.456(3)  | 2.442(3) | /         | /         | /         | 2.389(6)  | 2.606(3)  | 2.474(2) |
| <b>2d</b> (Y)  | 2.485(6)  | 2.488(5) | /         | /         | /         | 2.424(6)  | 2.634(5)  | 2.485(5) |
| <b>2e</b> (Dy) | 2.500(4)  | 2.502(4) | /         | /         | /         | 2.435(4)  | 2.653(6)  | 2.493(3) |
| <b>3a</b> (Yb) | 2.456(10) | /        | 2.415(10) | /         | /         | 2.369(8)  | 2.546(7)  | 2.414(7) |
| <b>3b</b> (Er) | 2.474(8)  | /        | 2.459(8)  | /         | /         | 2.354(10) | 2.560(6)  | 2.435(6) |
| <b>3c</b> (Y)  | 2.500(4)  | /        | 2.490(4)  | /         | /         | 2.412(3)  | 2.591(5)  | 2.458(3) |
| <b>3d</b> (Dy) | 2.507(4)  | /        | 2.491(4)  | /         | /         | 2.419(4)  | 2.607(3)  | 2.470(3) |
| <b>3e</b> (Gd) | 2.533(6)  | /        | 2.533(7)  | /         | /         | 2.442(7)  | 2.641(5)  | 2.489(7) |

**Table S23.** Crystal data and structure refinement for **1a-1e**

|                                                                        | <b>1a</b>                                                                       | <b>1b</b>                                                                       | <b>1c</b>                                                                       | <b>1d</b>                                                                      | <b>1e</b>                                                                       |
|------------------------------------------------------------------------|---------------------------------------------------------------------------------|---------------------------------------------------------------------------------|---------------------------------------------------------------------------------|--------------------------------------------------------------------------------|---------------------------------------------------------------------------------|
| Formula                                                                | C <sub>44</sub> H <sub>74</sub> LuN <sub>3</sub> O <sub>2</sub> Si <sub>2</sub> | C <sub>44</sub> H <sub>74</sub> YbN <sub>3</sub> O <sub>2</sub> Si <sub>2</sub> | C <sub>44</sub> H <sub>74</sub> ErN <sub>3</sub> O <sub>2</sub> Si <sub>2</sub> | C <sub>44</sub> H <sub>74</sub> YN <sub>3</sub> O <sub>2</sub> Si <sub>2</sub> | C <sub>44</sub> H <sub>74</sub> DyN <sub>3</sub> O <sub>2</sub> Si <sub>2</sub> |
| FW                                                                     | 908.21                                                                          | 906.28                                                                          | 900.50                                                                          | 822.15                                                                         | 895.74                                                                          |
| T (K)                                                                  | 300                                                                             | 300                                                                             | 300                                                                             | 300                                                                            | 300                                                                             |
| $\lambda$ (Å)                                                          | 0.71073                                                                         | 0.71073                                                                         | 0.71073                                                                         | 0.71073                                                                        | 0.71073                                                                         |
| Crystal system                                                         | Monoclinic                                                                      | Monoclinic                                                                      | Monoclinic                                                                      | Monoclinic                                                                     | Monoclinic                                                                      |
| Space group                                                            | <i>P2<sub>1</sub>/c</i>                                                         | <i>P2<sub>1</sub>/c</i>                                                         | <i>P2<sub>1</sub>/c</i>                                                         | <i>P2<sub>1</sub>/c</i>                                                        | <i>P2<sub>1</sub>/c</i>                                                         |
| a (Å)                                                                  | 12.8893(7)                                                                      | 12.887(3)                                                                       | 12.905(4)                                                                       | 12.860(3)                                                                      | 12.958(3)                                                                       |
| b (Å)                                                                  | 39.791(2)                                                                       | 39.892(9)                                                                       | 39.957(11)                                                                      | 39.772(8)                                                                      | 40.101(8)                                                                       |
| c (Å)                                                                  | 10.5197(6)                                                                      | 10.500(2)                                                                       | 10.506(3)                                                                       | 10.405(2)                                                                      | 10.503(2)                                                                       |
| $\alpha$ (deg)                                                         | 90                                                                              | 90                                                                              | 90                                                                              | 90                                                                             | 90                                                                              |
| $\beta$ (deg)                                                          | 113.687(1)                                                                      | 113.607(6)                                                                      | 113.507(4)                                                                      | 113.53(3)                                                                      | 113.45(3)                                                                       |
| $\gamma$ (deg)                                                         | 90                                                                              | 90                                                                              | 90                                                                              | 90                                                                             | 90                                                                              |
| <i>V</i> (Å <sup>3</sup> )                                             | 4940.7(5)                                                                       | 4946.2(19)                                                                      | 4968(3)                                                                         | 4879(2)                                                                        | 5007(2)                                                                         |
| Z                                                                      | 4                                                                               | 4                                                                               | 4                                                                               | 4                                                                              | 4                                                                               |
| $\rho_{\text{calc}}$ (g·cm <sup>-3</sup> )                             | 1.221                                                                           | 1.217                                                                           | 1.204                                                                           | 1.119                                                                          | 1.188                                                                           |
| $\mu$ (mm <sup>-1</sup> )                                              | 2.080                                                                           | 1.973                                                                           | 1.771                                                                           | 1.279                                                                          | 1.573                                                                           |
| F (000)                                                                | 1896.0                                                                          | 1892.0                                                                          | 1884.0                                                                          | 1768.0                                                                         | 1876.0                                                                          |
| $\theta$ range (deg)                                                   | 1.023 to 27.499                                                                 | 2.942 to 27.532                                                                 | 1.795 to 27.492                                                                 | 2.959 to 27.661                                                                | 2.932 to 27.546                                                                 |
| Reflections collected                                                  | 57484                                                                           | 182884                                                                          | 42868                                                                           | 195277                                                                         | 188539                                                                          |
| Independent reflections                                                | 11359                                                                           | 11407                                                                           | 11403                                                                           | 11397                                                                          | 11551                                                                           |
| <i>R</i> <sub>int</sub>                                                | 0.0493                                                                          | 0.0564                                                                          | 0.1263                                                                          | 0.0993                                                                         | 0.0558                                                                          |
| Data / restraints / parameters                                         | 11359 / 1099 / 810                                                              | 11407 / 1018 / 799                                                              | 11403 / 1176 / 791                                                              | 11397 / 1170 / 792                                                             | 11551 / 1160 / 790                                                              |
| Goodness-of-fit on F <sup>2</sup>                                      | 1.179                                                                           | 1.351                                                                           | 1.092                                                                           | 1.210                                                                          | 1.294                                                                           |
| R <sub>1</sub> , wR <sub>2</sub> [ <i>I</i> > 2 $\sigma$ ( <i>I</i> )] | 0.0563, 0.1060                                                                  | 0.0894, 0.1768                                                                  | 0.0829, 0.1247                                                                  | 0.1053, 0.1986                                                                 | 0.1031, 0.2108                                                                  |
| R <sub>1</sub> , wR <sub>2</sub> (all data)                            | 0.0743, 0.1113                                                                  | 0.0959, 0.1847                                                                  | 0.1819, 0.1528                                                                  | 0.1429, 0.2116                                                                 | 0.1139, 0.2149                                                                  |
| Largest diff. peak and hole e.Å <sup>-3</sup>                          | 1.16, -2.34                                                                     | 1.69, -4.45                                                                     | 1.25, -1.62                                                                     | 0.64, -1.40                                                                    | 2.21, -5.05                                                                     |

**Table S24.** Crystal data and structure refinement for **2a-2e**

|                            | <b>(2a)<sub>2</sub>·C<sub>7</sub>H<sub>8</sub></b>                                                | <b>2b</b>                                           | <b>2c</b>                                          | <b>2d</b>                                         | <b>2e</b>                                          |
|----------------------------|---------------------------------------------------------------------------------------------------|-----------------------------------------------------|----------------------------------------------------|---------------------------------------------------|----------------------------------------------------|
| Formula                    | (C <sub>60</sub> H <sub>83</sub> LuN <sub>6</sub> Si) <sub>2</sub> ·C <sub>7</sub> H <sub>8</sub> | C <sub>60</sub> H <sub>83</sub> YbN <sub>6</sub> Si | C <sub>64</sub> H <sub>91</sub> ErN <sub>6</sub> O | C <sub>64</sub> H <sub>91</sub> YN <sub>6</sub> O | C <sub>64</sub> H <sub>91</sub> DyN <sub>6</sub> O |
| FW                         | 2274.91                                                                                           | 1089.46                                             | 1155.78                                            | 1077.43                                           | 1151.02                                            |
| T (K)                      | 300                                                                                               | 300                                                 | 300                                                | 300                                               | 300                                                |
| $\lambda$ (Å)              | 0.71073                                                                                           | 0.71073                                             | 0.71073                                            | 0.71073                                           | 0.71073                                            |
| Crystal system             | Triclinic                                                                                         | Triclinic                                           | Triclinic                                          | Monoclinic                                        | Monoclinic                                         |
| Space group                | <i>P</i> $\bar{1}$                                                                                | <i>P</i> $\bar{1}$                                  | <i>P</i> $\bar{1}$                                 | <i>P2<sub>1</sub>/c</i>                           | <i>P2<sub>1</sub>/c</i>                            |
| a (Å)                      | 13.4249(7)                                                                                        | 13.372(5)                                           | 13.1343(18)                                        | 16.63(3)                                          | 16.598(3)                                          |
| b (Å)                      | 13.4551(7)                                                                                        | 13.624(6)                                           | 13.9845(19)                                        | 19.68(4)                                          | 19.476(3)                                          |
| c (Å)                      | 18.955(1)                                                                                         | 18.823(8)                                           | 18.709(3)                                          | 19.37(4)                                          | 19.325(3)                                          |
| $\alpha$ (deg)             | 73.095(1)                                                                                         | 72.565(5)                                           | 73.486(2)                                          | 90                                                | 90                                                 |
| $\beta$ (deg)              | 84.897(1)                                                                                         | 84.873(5)                                           | 84.862(2)                                          | 94.60(3)                                          | 94.720(2)                                          |
| $\gamma$ (deg)             | 70.203(1)                                                                                         | 70.974(5)                                           | 71.051(2)                                          | 90                                                | 90                                                 |
| <i>V</i> (Å <sup>3</sup> ) | 3082.2(3)                                                                                         | 3093(2)                                             | 3116.1(8)                                          | 6319(22)                                          | 6225.9(18)                                         |

|                                               |                   |                     |                    |                   |                   |
|-----------------------------------------------|-------------------|---------------------|--------------------|-------------------|-------------------|
| Z                                             | 1                 | 2                   | 2                  | 4                 | 4                 |
| $\rho_{\text{calc}}$ (g·cm <sup>-3</sup> )    | 1.226             | 1.170               | 1.232              | 1.133             | 1.228             |
| $\mu$ (mm <sup>-1</sup> )                     | 1.662             | 1.569               | 1.409              | 0.985             | 1.263             |
| F (000)                                       | 1190.0            | 1138.0              | 1214.0             | 2312.0            | 2420.0            |
| $\theta$ range (deg)                          | 1.123 to 27.502   | 1.134 to 25.398     | 1.135 to 27.481    | 1.228 to 24.998   | 1.231 to 27.487   |
| Reflections collected                         | 36378             | 30465               | 36406              | 57841             | 72329             |
| Independent reflections                       | 14175             | 11393               | 14277              | 11127             | 14284             |
| $R_{\text{int}}$                              | 0.0494            | 0.0543              | 0.0307             | 0.1114            | 0.0766            |
| Data / restraints / parameters                | 14175 / 628 / 818 | 11393 / 1468 / 1037 | 14277 / 1227 / 985 | 11127 / 791 / 864 | 14284 / 692 / 856 |
| Goodness-of-fit on F2                         | 0.992             | 1.073               | 1.026              | 1.016             | 1.002             |
| R1, wR2 [ $I \geq 2\sigma(I)$ ]               | 0.0490, 0.1023    | 0.0674, 0.1523      | 0.0373, 0.0924     | 0.0562, 0.1272    | 0.0455, 0.0894    |
| R1, wR2 (all data)                            | 0.0775, 0.1120    | 0.1066, 0.1698      | 0.0472, 0.0972     | 0.1252, 0.1583    | 0.0879, 0.1035    |
| Largest diff. peak and hole e.Å <sup>-3</sup> | 1.31, -0.65       | 2.02, -1.47         | 1.765, -0.90       | 0.32, -0.53       | 2.11, -0.63       |

**Table S25.** Crystal data and structure refinement for **3a-3e**

|                                            | <b>3a·(C<sub>6</sub>H<sub>14</sub>)<sub>0.5</sub></b>                                                     | <b>3b·(C<sub>6</sub>H<sub>14</sub>)<sub>0.5</sub></b>                                                     | <b>3c·(C<sub>6</sub>H<sub>14</sub>)<sub>0.5</sub></b>                                                    | <b>3d·(C<sub>6</sub>H<sub>14</sub>)<sub>0.5</sub></b>                                                     | <b>3e·(C<sub>6</sub>H<sub>14</sub>)<sub>0.5</sub></b>                                                     |
|--------------------------------------------|-----------------------------------------------------------------------------------------------------------|-----------------------------------------------------------------------------------------------------------|----------------------------------------------------------------------------------------------------------|-----------------------------------------------------------------------------------------------------------|-----------------------------------------------------------------------------------------------------------|
| Formula                                    | C <sub>60</sub> H <sub>87</sub> YbN <sub>6</sub> O<br>Si·(C <sub>6</sub> H <sub>14</sub> ) <sub>0.5</sub> | C <sub>60</sub> H <sub>87</sub> ErN <sub>6</sub> O<br>Si·(C <sub>6</sub> H <sub>14</sub> ) <sub>0.5</sub> | C <sub>60</sub> H <sub>87</sub> YN <sub>6</sub> O<br>Si·(C <sub>6</sub> H <sub>14</sub> ) <sub>0.5</sub> | C <sub>60</sub> H <sub>87</sub> DyN <sub>6</sub> O<br>Si·(C <sub>6</sub> H <sub>14</sub> ) <sub>0.5</sub> | C <sub>60</sub> H <sub>87</sub> GdN <sub>6</sub> O<br>Si·(C <sub>6</sub> H <sub>14</sub> ) <sub>0.5</sub> |
| FW                                         | 1152.57                                                                                                   | 1146.79                                                                                                   | 1068.44                                                                                                  | 1142.03                                                                                                   | 1136.78                                                                                                   |
| T (K)                                      | 300                                                                                                       | 300                                                                                                       | 300                                                                                                      | 300                                                                                                       | 300                                                                                                       |
| $\lambda$ (Å)                              | 0.71073                                                                                                   | 0.71073                                                                                                   | 0.71073                                                                                                  | 0.71073                                                                                                   | 0.71073                                                                                                   |
| Crystal system                             | Triclinic                                                                                                 | Triclinic                                                                                                 | Triclinic                                                                                                | Triclinic                                                                                                 | Triclinic                                                                                                 |
| Space group                                | $P\bar{1}$                                                                                                | $P\bar{1}$                                                                                                | $P\bar{1}$                                                                                               | $P\bar{1}$                                                                                                | $P\bar{1}$                                                                                                |
| a (Å)                                      | 10.5491(9)                                                                                                | 10.554(9)                                                                                                 | 10.5911(5)                                                                                               | 10.6118(4)                                                                                                | 10.6574(12)                                                                                               |
| b (Å)                                      | 12.7578(12)                                                                                               | 12.716(12)                                                                                                | 12.7677(7)                                                                                               | 12.7636(5)                                                                                                | 12.7730(14)                                                                                               |
| c (Å)                                      | 23.367(2)                                                                                                 | 23.25(2)                                                                                                  | 23.3687(13)                                                                                              | 23.3508(10)                                                                                               | 23.381(3)                                                                                                 |
| $\alpha$ (deg)                             | 103.217(4)                                                                                                | 103.08(4)                                                                                                 | 102.763(2)                                                                                               | 102.801(2)                                                                                                | 102.815(2)                                                                                                |
| $\beta$ (deg)                              | 95.149(4)                                                                                                 | 94.75(4)                                                                                                  | 94.670(2)                                                                                                | 94.606(2)                                                                                                 | 94.392(2)                                                                                                 |
| $\gamma$ (deg)                             | 94.504(4)                                                                                                 | 94.70(3)                                                                                                  | 94.644(2)                                                                                                | 94.785(2)                                                                                                 | 94.981(2)                                                                                                 |
| $V$ (Å <sup>3</sup> )                      | 3033.2(5)                                                                                                 | 3013(5)                                                                                                   | 3055.7(3)                                                                                                | 3057.5(2)                                                                                                 | 3076.7(6)                                                                                                 |
| Z                                          | 2                                                                                                         | 2                                                                                                         | 2                                                                                                        | 2                                                                                                         | 2                                                                                                         |
| $\rho_{\text{calc}}$ (g·cm <sup>-3</sup> ) | 1.262                                                                                                     | 1.264                                                                                                     | 1.161                                                                                                    | 1.240                                                                                                     | 1.227                                                                                                     |
| $\mu$ (mm <sup>-1</sup> )                  | 1.605                                                                                                     | 1.457                                                                                                     | 1.017                                                                                                    | 1.285                                                                                                     | 1.140                                                                                                     |
| F (000)                                    | 1212.0                                                                                                    | 1208.0                                                                                                    | 1150.0                                                                                                   | 1204.0                                                                                                    | 1200.0                                                                                                    |
| $\theta$ range (deg)                       | 2.911 to 25.000                                                                                           | 2.885 to 25.000                                                                                           | 2.877 to 24.999                                                                                          | 2.879 to 27.559                                                                                           | 2.885 to 27.611                                                                                           |
| Reflections collected                      | 99814                                                                                                     | 95245                                                                                                     | 124009                                                                                                   | 127330                                                                                                    | 27147                                                                                                     |
| Independent reflections                    | 10701                                                                                                     | 10629                                                                                                     | 10765                                                                                                    | 14137                                                                                                     | 14305                                                                                                     |
| $R_{\text{int}}$                           | 0.1437                                                                                                    | 0.1155                                                                                                    | 0.1177                                                                                                   | 0.0780                                                                                                    | 0.0515                                                                                                    |
| Data / restraints / parameters             | 10701 / 1574 / 1040                                                                                       | 10629 / 1214 / 921                                                                                        | 10765 / 1613 / 1050                                                                                      | 14137 / 1560 / 1032                                                                                       | 14305 / 1587 / 1040                                                                                       |
| Goodness-of-fit on F2                      | 1.121                                                                                                     | 1.184                                                                                                     | 1.059                                                                                                    | 1.097                                                                                                     | 1.044                                                                                                     |
| R1, wR2                                    | 0.0744,                                                                                                   | 0.0776,                                                                                                   | 0.0559,                                                                                                  | 0.0545,                                                                                                   | 0.0691, 0.1495                                                                                            |

|                                               |                |                |                |                |                |
|-----------------------------------------------|----------------|----------------|----------------|----------------|----------------|
| $[I \geq 2\sigma(I)]$                         | 0.1337         | 0.1477         | 0.1477         | 0.1028         |                |
| R1, wR2 (all data)                            | 0.1090, 0.1468 | 0.1006, 0.1589 | 0.1006, 0.1410 | 0.0729, 0.1102 | 0.1202, 0.1752 |
| Largest diff. peak and hole e.Å <sup>-3</sup> | 1.32, -1.42    | 1.59, -1.59    | 0.59, -0.44    | 1.70, -1.05    | 1.85, -1.34    |

**Table S26.** Crystal data and structure refinement for **4a-4d**

|                                               | <b>4a</b>                                                                       | <b>4b</b>                                                                       | <b>4c</b>                                                                       | <b>4d</b>                                                                      |
|-----------------------------------------------|---------------------------------------------------------------------------------|---------------------------------------------------------------------------------|---------------------------------------------------------------------------------|--------------------------------------------------------------------------------|
| Formula                                       | C <sub>78</sub> H <sub>104</sub> Lu <sub>2</sub> N <sub>10</sub> O <sub>2</sub> | C <sub>78</sub> H <sub>104</sub> Yb <sub>2</sub> N <sub>10</sub> O <sub>2</sub> | C <sub>78</sub> H <sub>104</sub> Er <sub>2</sub> N <sub>10</sub> O <sub>2</sub> | C <sub>78</sub> H <sub>104</sub> Y <sub>2</sub> N <sub>10</sub> O <sub>2</sub> |
| FW                                            | 1563.65                                                                         | 1559.79                                                                         | 1548.23                                                                         | 1391.53                                                                        |
| T (K)                                         | 300                                                                             | 300                                                                             | 300                                                                             | 300                                                                            |
| $\lambda$ (Å)                                 | 0.71073                                                                         | 0.71073                                                                         | 0.71073                                                                         | 0.71073                                                                        |
| Crystal system                                | Monoclinic                                                                      | Monoclinic                                                                      | Monoclinic                                                                      | Monoclinic                                                                     |
| Space group                                   | <i>C2/c</i>                                                                     | <i>C2/c</i>                                                                     | <i>C2/c</i>                                                                     | <i>C2/c</i>                                                                    |
| a (Å)                                         | 13.6267(10)                                                                     | 13.6308(8)                                                                      | 13.6472(7)                                                                      | 13.6694(7)                                                                     |
| b (Å)                                         | 20.1993(15)                                                                     | 20.2415(11)                                                                     | 20.2383(10)                                                                     | 20.2490(11)                                                                    |
| c (Å)                                         | 26.817(2)                                                                       | 26.8881(15)                                                                     | 26.8628(14)                                                                     | 26.9122(14)                                                                    |
| $\alpha$ (deg)                                | 90                                                                              | 90                                                                              | 90                                                                              | 90                                                                             |
| $\beta$ (deg)                                 | 91.110(1)                                                                       | 91.364(1)                                                                       | 91.340(1)                                                                       | 91.415(1)                                                                      |
| $\gamma$ (deg)                                | 90                                                                              | 90                                                                              | 90                                                                              | 90                                                                             |
| $V$ (Å <sup>3</sup> )                         | 7380.0(9)                                                                       | 7416.5(7)                                                                       | 7417.4(7)                                                                       | 7446.8(7)                                                                      |
| Z                                             | 4                                                                               | 4                                                                               | 4                                                                               | 4                                                                              |
| $\rho_{\text{calc}}$ (g·cm <sup>-3</sup> )    | 1.407                                                                           | 1.397                                                                           | 1.386                                                                           | 1.241                                                                          |
| $\mu$ (mm <sup>-1</sup> )                     | 2.711                                                                           | 2.558                                                                           | 2.299                                                                           | 1.602                                                                          |
| F (000)                                       | 3200.0                                                                          | 3192.0                                                                          | 3176.0                                                                          | 2944.0                                                                         |
| $\theta$ range (deg)                          | 1.519 to 24.998                                                                 | 1.515 to 25.000                                                                 | 1.517 to 25.000                                                                 | 1.514 to 24.999                                                                |
| Reflections collected                         | 35887                                                                           | 35942                                                                           | 36004                                                                           | 36188                                                                          |
| Independent reflections                       | 6507                                                                            | 6534                                                                            | 6539                                                                            | 6569                                                                           |
| $R_{\text{int}}$                              | 0.0748                                                                          | 0.0394                                                                          | 0.0887                                                                          | 0.0800                                                                         |
| Data / restraints / parameters                | 6507 / 749 / 616                                                                | 6534 / 757 / 625                                                                | 6539 / 781 / 625                                                                | 6569 / 786 / 616                                                               |
| Goodness-of-fit on F <sup>2</sup>             | 1.032                                                                           | 1.113                                                                           | 1.053                                                                           | 1.026                                                                          |
| R1, wR2 [ $I \geq 2\sigma(I)$ ]               | 0.0415, 0.0824                                                                  | 0.0385, 0.0935                                                                  | 0.0485, 0.0888                                                                  | 0.0568, 0.1280                                                                 |
| R1, wR2 (all data)                            | 0.0702 0.0916                                                                   | 0.0468 0.0978                                                                   | 0.0878 0.1015                                                                   | 0.1030 0.1497                                                                  |
| Largest diff. peak and hole e.Å <sup>-3</sup> | 0.69, -0.62                                                                     | 1.08, -0.40                                                                     | 1.42, -0.55                                                                     | 0.56, -0.26                                                                    |

**Table S27.** Crystal data and structure refinement for **5a-5d**

|                | <b>5a</b>                                        | <b>5b</b>                                        | <b>5c</b>                                        | <b>5d</b>                                       |
|----------------|--------------------------------------------------|--------------------------------------------------|--------------------------------------------------|-------------------------------------------------|
| Formula        | C <sub>64</sub> H <sub>83</sub> LuN <sub>8</sub> | C <sub>64</sub> H <sub>83</sub> YbN <sub>8</sub> | C <sub>64</sub> H <sub>83</sub> ErN <sub>8</sub> | C <sub>64</sub> H <sub>83</sub> YN <sub>8</sub> |
| FW             | 1139.36                                          | 1137.43                                          | 1131.65                                          | 1053.30                                         |
| T (K)          | 300                                              | 300                                              | 300                                              | 300                                             |
| $\lambda$ (Å)  | 0.71073                                          | 0.71073                                          | 0.71073                                          | 0.71073                                         |
| Crystal system | Triclinic                                        | Monoclinic                                       | Triclinic                                        | Triclinic                                       |
| Space group    | <i>P</i> $\bar{1}$                               | <i>P2</i> <sub>1</sub> / <i>c</i>                | <i>P</i> $\bar{1}$                               | <i>P</i> $\bar{1}$                              |
| a (Å)          | 13.584(5)                                        | 24.140(4)                                        | 13.665(6)                                        | 13.6160(16)                                     |
| b (Å)          | 18.222(7)                                        | 13.516(2)                                        | 18.226(8)                                        | 18.253(2)                                       |

|                                               |                     |                   |                     |                     |
|-----------------------------------------------|---------------------|-------------------|---------------------|---------------------|
| c (Å)                                         | 25.76(1)            | 18.231(3)         | 25.786(12)          | 25.838(3)           |
| $\alpha$ (deg)                                | 70.931(5)           | 90                | 71.040(6)           | 71.129(2)           |
| $\beta$ (deg)                                 | 81.514(5)           | 91.093(2)         | 81.488(6)           | 81.630(2)           |
| $\gamma$ (deg)                                | 89.800(5)           | 90                | 89.511(7)           | 89.722(2)           |
| $V$ (Å <sup>3</sup> )                         | 5954(4)             | 5947.3(16)        | 6002(5)             | 6005.6(12)          |
| Z                                             | 4                   | 4                 | 4                   | 4                   |
| $\rho_{\text{calc}}$ (g·cm <sup>-3</sup> )    | 1.271               | 1.270             | 1.252               | 1.165               |
| $\mu$ (mm <sup>-1</sup> )                     | 1.703               | 1.617             | 1.442               | 1.015               |
| F (000)                                       | 2376.0              | 2372.0            | 2364.0              | 2248.0              |
| $\theta$ range (deg)                          | 1.684 to 24.737     | 1.727 to 24.999   | 1.682 to 25.000     | 1.68 to 25.000      |
| Reflections collected                         | 20349               | 56385             | 59247               | 58706               |
| Independent reflections                       | 20349               | 10456             | 21146               | 21167               |
| $R_{\text{int}}$                              | /                   | 0.1097            | 0.0500              | 0.0823              |
| Data / restraints / parameters                | 20349 / 1490 / 1430 | 10456 / 669 / 715 | 21146 / 1255 / 1477 | 21167 / 1201 / 1479 |
| Goodness-of-fit on F <sup>2</sup>             | 1.034               | 1.023             | 1.025               | 1.018               |
| R1, $wR2$ [ $I \geq 2\sigma(I)$ ]             | 0.0995, 0.2720      | 0.0640, 0.1489    | 0.0567, 0.1324      | 0.0811, 0.2044      |
| R1, $wR2$ (all data)                          | 0.2217, 0.3381      | 0.1310, 0.1803    | 0.1129, 0.1585      | 0.1901, 0.2621      |
| Largest diff. peak and hole e.Å <sup>-3</sup> | 1.79, -1.61         | 1.18, -1.63       | 1.23, -1.31         | 1.33, -0.47         |

**Table S28.** Crystal data and structure refinement for **6a-6d**

|                                            | <b>6a</b>                                        | <b>6b</b>                                        | <b>6c</b>                                        | <b>6d</b>                                       |
|--------------------------------------------|--------------------------------------------------|--------------------------------------------------|--------------------------------------------------|-------------------------------------------------|
| Formula                                    | C <sub>62</sub> H <sub>79</sub> LuN <sub>8</sub> | C <sub>62</sub> H <sub>79</sub> YbN <sub>8</sub> | C <sub>62</sub> H <sub>79</sub> ErN <sub>8</sub> | C <sub>62</sub> H <sub>79</sub> YN <sub>8</sub> |
| FW                                         | 1111.30                                          | 1109.38                                          | 1102.59                                          | 1025.24                                         |
| T (K)                                      | 300                                              | 300                                              | 300                                              | 300                                             |
| $\lambda$ (Å)                              | 0.71073                                          | 0.71073                                          | 0.71073                                          | 0.71073                                         |
| Crystal system                             | Triclinic                                        | Triclinic                                        | Triclinic                                        | Triclinic                                       |
| Space group                                | $P\bar{1}$                                       | $P\bar{1}$                                       | $P\bar{1}$                                       | $P\bar{1}$                                      |
| a (Å)                                      | 13.2585(12)                                      | 13.2252(8)                                       | 13.255(10)                                       | 13.210(2)                                       |
| b (Å)                                      | 13.3239(12)                                      | 13.3516(9)                                       | 13.375(10)                                       | 13.311(2)                                       |
| c (Å)                                      | 18.7854(18)                                      | 18.7595(11)                                      | 18.831(14)                                       | 18.771(3)                                       |
| $\alpha$ (deg)                             | 84.057(3)                                        | 83.489(2)                                        | 83.839(10)                                       | 83.749(2)                                       |
| $\beta$ (deg)                              | 71.876(3)                                        | 71.436(2)                                        | 71.754(10)                                       | 71.645(2)                                       |
| $\gamma$ (deg)                             | 69.550(3)                                        | 69.008(2)                                        | 69.498(10)                                       | 69.345(2)                                       |
| $V$ (Å <sup>3</sup> )                      | 2955.1(5)                                        | 2931.7(3)                                        | 2970(4)                                          | 2931.4(8)                                       |
| Z                                          | 2                                                | 2                                                | 2                                                | 2                                               |
| $\rho_{\text{calc}}$ (g·cm <sup>-3</sup> ) | 1.249                                            | 1.257                                            | 1.233                                            | 1.161                                           |
| $\mu$ (mm <sup>-1</sup> )                  | 1.714                                            | 1.639                                            | 1.456                                            | 1.038                                           |
| F (000)                                    | 1156.0                                           | 1154.0                                           | 1148.0                                           | 1092.0                                          |
| $\theta$ range (deg)                       | 2.582 to 24.999                                  | 2.571 to 27.549                                  | 1.139 to 24.999                                  | 1.143 to 27.433                                 |
| Reflections collected                      | 133141                                           | 108290                                           | 28901                                            | 33972                                           |
| Independent reflections                    | 10386                                            | 13557                                            | 10446                                            | 13384                                           |
| $R_{\text{int}}$                           | 0.0893                                           | 0.0802                                           | 0.0580                                           | 0.0467                                          |
| Data / restraints / parameters             | 10386 / 1139 / 975                               | 13557 / 783 / 850                                | 10446 / 692 / 833                                | 13384 / 795 / 851                               |
| Goodness-of-                               | 1.084                                            | 1.039                                            | 1.002                                            | 1.034                                           |



|                                                    |                |                |                |                |
|----------------------------------------------------|----------------|----------------|----------------|----------------|
| fit on F2                                          |                |                |                |                |
| R1, $wR2$<br>[ $I \geq 2\sigma(I)$ ]               | 0.0352, 0.0801 | 0.0383, 0.0914 | 0.0506, 0.1331 | 0.0489, 0.1159 |
| R1, $wR2$ (all data)                               | 0.0478, 0.0867 | 0.0546, 0.0994 | 0.0711, 0.1455 | 0.0848, 0.1281 |
| Largest diff. peak and hole<br>$e.\text{\AA}^{-3}$ | 0.82, -0.76    | 1.34, -0.85    | 1.82, -1.29    | 0.34, -0.52    |

**Table S29.** Crystal data and structure refinement for **7a-7b**

|                                                    | <b>7a</b>            | <b>7b</b>           |
|----------------------------------------------------|----------------------|---------------------|
| Formula                                            | $C_{63}H_{85}ErN_8O$ | $C_{63}H_{85}YN_8O$ |
| FW                                                 | 1137.65              | 1059.30             |
| T (K)                                              | 300                  | 300                 |
| $\lambda$ (Å)                                      | 0.71073              | 0.71073             |
| Crystal system                                     | Triclinic            | Triclinic           |
| Space group                                        | $P\bar{1}$           | $P\bar{1}$          |
| a (Å)                                              | 11.152(3)            | 11.1074(3)          |
| b (Å)                                              | 14.224(4)            | 14.1540(3)          |
| c (Å)                                              | 19.011(5)            | 18.9061(5)          |
| $\alpha$ (deg)                                     | 74.607(3)            | 74.549(1)           |
| $\beta$ (deg)                                      | 86.798(3)            | 86.700(2)           |
| $\gamma$ (deg)                                     | 80.220(3)            | 80.292(1)           |
| $V$ (Å <sup>3</sup> )                              | 2865.0(13)           | 2823.61(12)         |
| Z                                                  | 2                    | 2                   |
| $\rho_{\text{calc}}$ (g·cm <sup>-3</sup> )         | 1.319                | 1.246               |
| $\mu$ (mm <sup>-1</sup> )                          | 1.513                | 1821                |
| F (000)                                            | 1190.0               | 1132.0              |
| $\theta$ range (deg)                               | 1.505 to 25.000      | 2.425 to 68.437     |
| Reflections collected                              | 27272                | 52987               |
| Independent reflections                            | 10096                | 10385               |
| $R_{\text{int}}$                                   | 0.1396               | 0.0911              |
| Data / restraints / parameters                     | 10096 / 1490 / 1007  | 10385 / 1276 / 980  |
| Goodness-of-fit on F2                              | 0.982                | 1.079               |
| R1, $wR2$<br>[ $I \geq 2\sigma(I)$ ]               | 0.0735, 0.1307       | 0.0535, 0.1322      |
| R1, $wR2$ (all data)                               | 0.1556, 0.1569       | 0.0820, 0.1520      |
| Largest diff. peak and hole<br>$e.\text{\AA}^{-3}$ | 1.67, -1.76          | 1.07, -1.22         |

**Table S30.** Crystal data and structure refinement for **8-9**

|                | <b>8a</b>           | <b>8b</b>          | <b>9</b>             |
|----------------|---------------------|--------------------|----------------------|
| Formula        | $C_{67}H_{80}ErN_7$ | $C_{67}H_{80}YN_7$ | $C_{71}H_{88}DyN_7O$ |
| FW             | 1150.64             | 1072.29            | 1217.99              |
| T (K)          | 300                 | 300                | 300                  |
| $\lambda$ (Å)  | 0.71073             | 0.71073            | 0.71073              |
| Crystal system | Triclinic           | Triclinic          | Triclinic            |
| Space group    | $P\bar{1}$          | $P\bar{1}$         | $P\bar{1}$           |
| a (Å)          | 13.3096(11)         | 13.338(4)          | 13.5582(10)          |

|                                               |                     |                     |                    |
|-----------------------------------------------|---------------------|---------------------|--------------------|
| b (Å)                                         | 13.3936(11)         | 13.409(4)           | 20.4707(15)        |
| c (Å)                                         | 19.2327(16)         | 19.202(6)           | 23.6618(17)        |
| $\alpha$ (deg)                                | 82.266(1)           | 82.575(4)           | 100.406(1)         |
| $\beta$ (deg)                                 | 72.456(1)           | 72.696(4)           | 90.275(1)          |
| $\gamma$ (deg)                                | 68.290(1)           | 68.602(4)           | 99.791(1)          |
| $V$ (Å <sup>3</sup> )                         | 3036.1(4)           | 3052.0(16)          | 6360.9(8)          |
| Z                                             | 2                   | 2                   | 4                  |
| $\rho_{\text{calc}}$ (g·cm <sup>-3</sup> )    | 1.259               | 1.167               | 1.272              |
| $\mu$ (mm <sup>-1</sup> )                     | 1.427               | 1.000               | 1.223              |
| F (000)                                       | 1198.0              | 1140.0              | 6360.9(8)          |
| $\theta$ range (deg)                          | 1.111 to 27.459     | 1.631 to 25.000     | 1.221 to 27.601    |
| Reflections collected                         | 35673               | 29678               | 29539              |
| Independent reflections                       | 13904               | 10734               | 29539              |
| $R_{\text{int}}$                              | 0.0311              | 0.1247              | /                  |
| Data / restraints / parameters                | 13904 / 1351 / 1035 | 10734 / 1964 / 1183 | 29539 / 757 / 1682 |
| Goodness-of-fit on F <sup>2</sup>             | 1.027               | 1.018               | 1.005              |
| R1, wR2 [ $I \geq 2\sigma(I)$ ]               | 0.0324, 0.0777      | 0.0837, 0.1565      | 0.0586, 0.1163     |
| R1, wR2 (all data)                            | 0.0400, 0.0808      | 0.1878, 0.1952      | 0.1124, 0.1356     |
| Largest diff. peak and hole e.Å <sup>-3</sup> | 1.03, -0.57         | 0.53, -0.48         | 2.19, -1.13        |

**Table S31.** Crystal data and structure refinement for **10-11**

|                                            | <b>(10a)<sub>2</sub>·C<sub>7</sub>H<sub>8</sub></b>                                              | <b>(10b)<sub>4</sub>·(C<sub>7</sub>H<sub>8</sub>)<sub>2</sub>·C<sub>6</sub>H<sub>14</sub></b>                                                   | <b>(10c)<sub>4</sub>·(C<sub>7</sub>H<sub>8</sub>)<sub>2</sub>·C<sub>6</sub>H<sub>14</sub></b>                                                    | <b>11·(C<sub>4</sub>H<sub>8</sub>O)<sub>2</sub></b>                                               |
|--------------------------------------------|--------------------------------------------------------------------------------------------------|-------------------------------------------------------------------------------------------------------------------------------------------------|--------------------------------------------------------------------------------------------------------------------------------------------------|---------------------------------------------------------------------------------------------------|
| Formula                                    | (C <sub>70</sub> H <sub>91</sub> ErN <sub>10</sub> ) <sub>2</sub> ·C <sub>7</sub> H <sub>8</sub> | (C <sub>70</sub> H <sub>91</sub> YN <sub>10</sub> ) <sub>4</sub> ·(C <sub>7</sub> H <sub>8</sub> ) <sub>2</sub> ·C <sub>6</sub> H <sub>14</sub> | (C <sub>70</sub> H <sub>91</sub> DyN <sub>10</sub> ) <sub>4</sub> ·(C <sub>7</sub> H <sub>8</sub> ) <sub>2</sub> ·C <sub>6</sub> H <sub>14</sub> | C <sub>66</sub> H <sub>87</sub> DyN <sub>10</sub> ·(C <sub>4</sub> H <sub>8</sub> O) <sub>2</sub> |
| FW                                         | 2571.72                                                                                          | 4916.20                                                                                                                                         | 5210.56                                                                                                                                          | 1327.17                                                                                           |
| T (K)                                      | 300                                                                                              | 300                                                                                                                                             | 300                                                                                                                                              | 300                                                                                               |
| $\lambda$ (Å)                              | 0.71073                                                                                          | 0.71073                                                                                                                                         | 0.71073                                                                                                                                          | 0.71073                                                                                           |
| Crystal system                             | Monoclinic                                                                                       | Monoclinic                                                                                                                                      | Monoclinic                                                                                                                                       | Monoclinic                                                                                        |
| Space group                                | <i>P</i> 2 <sub>1</sub> / <i>c</i>                                                               | <i>C</i> 2/ <i>c</i>                                                                                                                            | <i>C</i> 2/ <i>c</i>                                                                                                                             | <i>P</i> 2 <sub>1</sub> / <i>c</i>                                                                |
| a (Å)                                      | 21.640(3)                                                                                        | 30.880(2)                                                                                                                                       | 30.753(3)                                                                                                                                        | 12.8231(6)                                                                                        |
| b (Å)                                      | 23.137(3)                                                                                        | 22.9324(15)                                                                                                                                     | 22.844(2)                                                                                                                                        | 23.6040(11)                                                                                       |
| c (Å)                                      | 29.409(4)                                                                                        | 21.5684(14)                                                                                                                                     | 21.5677(19)                                                                                                                                      | 23.0899(10)                                                                                       |
| $\alpha$ (deg)                             | 90                                                                                               | 90                                                                                                                                              | 90                                                                                                                                               | 90                                                                                                |
| $\beta$ (deg)                              | 98.576(2)                                                                                        | 95.594(1)                                                                                                                                       | 95.600(1)                                                                                                                                        | 93.653(1)                                                                                         |
| $\gamma$ (deg)                             | 90                                                                                               | 90                                                                                                                                              | 90                                                                                                                                               | 90                                                                                                |
| $V$ (Å <sup>3</sup> )                      | 14560(3)                                                                                         | 15201.0(17)                                                                                                                                     | 15080(2)                                                                                                                                         | 6974.6(6)                                                                                         |
| Z                                          | 4                                                                                                | 2                                                                                                                                               | 2                                                                                                                                                | 4                                                                                                 |
| $\rho_{\text{calc}}$ (g·cm <sup>-3</sup> ) | 1.173                                                                                            | 1.074                                                                                                                                           | 1.148                                                                                                                                            | 1.264                                                                                             |
| $\mu$ (mm <sup>-1</sup> )                  | 1.198                                                                                            | 0.812                                                                                                                                           | 1.036                                                                                                                                            | 1.123                                                                                             |
| F (000)                                    | 5392.0                                                                                           | 5260.0                                                                                                                                          | 5476.0                                                                                                                                           | 2796.0                                                                                            |
| $\theta$ range (deg)                       | 1.125 to 25.000                                                                                  | 1.108 to 25.000                                                                                                                                 | 1.112 to 24.999                                                                                                                                  | 1.235 to 24.999                                                                                   |
| Reflections collected                      | 139385                                                                                           | 74054                                                                                                                                           | 71987                                                                                                                                            | 67930                                                                                             |
| Independent reflections                    | 25642                                                                                            | 13390                                                                                                                                           | 13295                                                                                                                                            | 12289                                                                                             |

|                                               |                     |                     |                     |                     |
|-----------------------------------------------|---------------------|---------------------|---------------------|---------------------|
| $R_{\text{int}}$                              | 0.1643              | 0.1229              | 0.1104              | 0.0771              |
| Data / restraints / parameters                | 25642 / 1483 / 1881 | 13390 / 1332 / 1124 | 13295 / 1379 / 1152 | 12289 / 1581 / 1184 |
| Goodness-of-fit on F2                         | 1.040               | 1.027               | 1.020               | 1.018               |
| R1, $wR2$ [ $I \geq 2\sigma(I)$ ]             | 0.0703, 0.1315      | 0.0848, 0.2184      | 0.0556, 0.1348      | 0.0422, 0.0763      |
| R1, $wR2$ (all data)                          | 0.1611, 0.1653      | 0.1791, 0.2827      | 0.1186, 0.1651      | 0.0795, 0.0890      |
| Largest diff. peak and hole e.Å <sup>-3</sup> | 1.69, -1.14         | 0.53, -0.83         | 0.68, -0.68         | 0.42, -0.35         |

**Table S32.** Crystal data and structure refinement for **12a-12d**

|                                               | <b>12a</b>                                       | <b>12b</b>                                       | <b>12c</b>                                      | <b>12d</b>                                       |
|-----------------------------------------------|--------------------------------------------------|--------------------------------------------------|-------------------------------------------------|--------------------------------------------------|
| Formula                                       | C <sub>66</sub> H <sub>80</sub> YbN <sub>8</sub> | C <sub>66</sub> H <sub>80</sub> ErN <sub>8</sub> | C <sub>66</sub> H <sub>80</sub> YN <sub>8</sub> | C <sub>66</sub> H <sub>80</sub> DyN <sub>8</sub> |
| FW                                            | 1158.42                                          | 1152.64                                          | 1074.29                                         | 1147.88                                          |
| T (K)                                         | 300                                              | 300                                              | 300                                             | 300                                              |
| $\lambda$ (Å)                                 | 0.71073                                          | 0.71073                                          | 0.71073                                         | 0.71073                                          |
| Crystal system                                | Triclinic                                        | Triclinic                                        | Triclinic                                       | Triclinic                                        |
| Space group                                   | $P\bar{1}$                                       | $P\bar{1}$                                       | $P\bar{1}$                                      | $P\bar{1}$                                       |
| a (Å)                                         | 13.2678(7)                                       | 13.2828(10)                                      | 13.275(4)                                       | 13.2834(8)                                       |
| b (Å)                                         | 13.3947(7)                                       | 13.3925(10)                                      | 13.391(4)                                       | 13.4042(8)                                       |
| c (Å)                                         | 19.2204(10)                                      | 19.2277(14)                                      | 19.241(6)                                       | 19.2405(11)                                      |
| $\alpha$ (deg)                                | 82.493(1)                                        | 82.472(1)                                        | 82.481(4)                                       | 82.430(1)                                        |
| $\beta$ (deg)                                 | 72.318(1)                                        | 72.475(1)                                        | 72.614(4)                                       | 72.629(1)                                        |
| $\gamma$ (deg)                                | 67.954(1)                                        | 68.097(1)                                        | 68.205(4)                                       | 68.145(1)                                        |
| $V$ (Å <sup>3</sup> )                         | 3016.0(3)                                        | 3025.6(4)                                        | 3030.0(16)                                      | 3033.8(3)                                        |
| Z                                             | 2                                                | 2                                                | 2                                               | 2                                                |
| $\rho_{\text{calc}}$ (g·cm <sup>-3</sup> )    | 1.276                                            | 1.265                                            | 1.178                                           | 1.257                                            |
| $\mu$ (mm <sup>-1</sup> )                     | 2.596                                            | 1.432                                            | 1.008                                           | 1.277                                            |
| F (000)                                       | 1204.0                                           | 1200.0                                           | 1142.0                                          | 1196.0                                           |
| $\theta$ range (deg)                          | 1.112 to 27.488                                  | 1.639 to 27.607                                  | 1.638 to 27.488                                 | 1.109 to 27.488                                  |
| Reflections collected                         | 35678                                            | 35144                                            | 35200                                           | 35735                                            |
| Independent reflections                       | 13855                                            | 14064                                            | 13915                                           | 13927                                            |
| $R_{\text{int}}$                              | 0.0432                                           | 0.0498                                           | 0.0829                                          | 0.0358                                           |
| Data / restraints / parameters                | 13855 / 551 / 833                                | 14064 / 1751 / 1137                              | 13915 / 550 / 845                               | 13927 / 1036 / 963                               |
| Goodness-of-fit on F2                         | 1.007                                            | 0.997                                            | 0.986                                           | 1.036                                            |
| R1, $wR2$ [ $I \geq 2\sigma(I)$ ]             | 0.0370, 0.0729                                   | 0.0414, 0.0776                                   | 0.0682, 0.1601                                  | 0.0348, 0.0807                                   |
| R1, $wR2$ (all data)                          | 0.0527, 0.0776                                   | 0.0642, 0.0843                                   | 0.1186, 0.1871                                  | 0.0452, 0.0845                                   |
| Largest diff. peak and hole e.Å <sup>-3</sup> | 1.07, -0.65                                      | 1.62, -1.48                                      | 1.38, -0.89                                     | 1.12, -0.61                                      |

**Table S33.** Crystal data and structure refinement for **13-14**

|         | <b>13·C<sub>7</sub>H<sub>8</sub></b>                                            | <b>14a C<sub>6</sub>H<sub>14</sub></b>                                             | <b>14b C<sub>6</sub>H<sub>14</sub></b>                                             | <b>14c C<sub>6</sub>H<sub>14</sub></b>                                            |
|---------|---------------------------------------------------------------------------------|------------------------------------------------------------------------------------|------------------------------------------------------------------------------------|-----------------------------------------------------------------------------------|
| Formula | C <sub>62</sub> H <sub>76</sub> ErN <sub>8</sub> ·C <sub>7</sub> H <sub>8</sub> | C <sub>95</sub> H <sub>102</sub> YbN <sub>11</sub> ·C <sub>6</sub> H <sub>14</sub> | C <sub>95</sub> H <sub>102</sub> ErN <sub>11</sub> ·C <sub>6</sub> H <sub>14</sub> | C <sub>95</sub> H <sub>102</sub> YN <sub>11</sub> ·C <sub>6</sub> H <sub>14</sub> |
| FW      | 1100.57                                                                         | 1657.09                                                                            | 1651.31                                                                            | 1572.96                                                                           |

|                                               |                   |                   |                   |                  |
|-----------------------------------------------|-------------------|-------------------|-------------------|------------------|
| T (K)                                         | 300               | 300               | 300               | 300              |
| $\lambda$ (Å)                                 | 0.71073           | 0.71073           | 0.71073           | 0.71073          |
| Crystal system                                | Triclinic         | Monoclinic        | Monoclinic        | Monoclinic       |
| Space group                                   | $P\bar{1}$        | $C2/c$            | $C2/c$            | $C2/c$           |
| a (Å)                                         | 14.584(9)         | 22.488(9)         | 22.4080(19)       | 22.4825(13)      |
| b (Å)                                         | 14.899(9)         | 20.758(8)         | 20.7325(18)       | 20.7751(12)      |
| c (Å)                                         | 15.053(9)         | 21.613(8)         | 21.4331(18)       | 21.4740(12)      |
| $\alpha$ (deg)                                | 75.276(6)         | 90                | 90                | 90               |
| $\beta$ (deg)                                 | 84.282(6)         | 114.787(5)        | 114.672(1)        | 115.007(1)       |
| $\gamma$ (deg)                                | 74.311(6)         | 90                | 90                | 90               |
| $V$ (Å <sup>3</sup> )                         | 3044(3)           | 9160(6)           | 9048.3(13)        | 9089.7(9)        |
| Z                                             | 2                 | 4                 | 4                 | 4                |
| $\rho_{\text{calc}}$ (g·cm <sup>-3</sup> )    | 1.201             | 1.202             | 1.212             | 1.149            |
| $\mu$ (mm <sup>-1</sup> )                     | 1.420             | 1.072             | 0.979             | 0.693            |
| F (000)                                       | 1144.0            | 3476.0            | 3468.0            | 3352.0           |
| $\theta$ range (deg)                          | 1.399 to 25.433   | 1.399 to 27.502   | 1.402 to 24.999   | 1.400 to 24.998  |
| Reflections collected                         | 11236             | 36960             | 43793             | 44084            |
| Independent reflections                       | 11236             | 10512             | 7975              | 8019             |
| $R_{\text{int}}$                              | /                 | 0.0396            | 0.1268            | 0.0848           |
| Data / restraints / parameters                | 11236 / 493 / 640 | 10512 / 920 / 756 | 7975 / 1178 / 821 | 8019 / 884 / 744 |
| Goodness-of-fit on F <sup>2</sup>             | 0.957             | 1.022             | 1.059             | 1.059            |
| R1, wR2 [ $I \geq 2\sigma(I)$ ]               | 0.1203, 0.2409    | 0.0370, 0.0916    | 0.0607, 0.1277    | 0.0598, 0.1405   |
| R1, wR2 (all data)                            | 0.2281 0.2770     | 0.0492 0.0992     | 0.0979 0.1448     | 0.0960 0.1576    |
| Largest diff. peak and hole e.Å <sup>-3</sup> | 2.18, -1.31       | 1.65, -1.05       | 1.69, -1.04       | 0.70, -0.35      |

## 9. IR Spectra

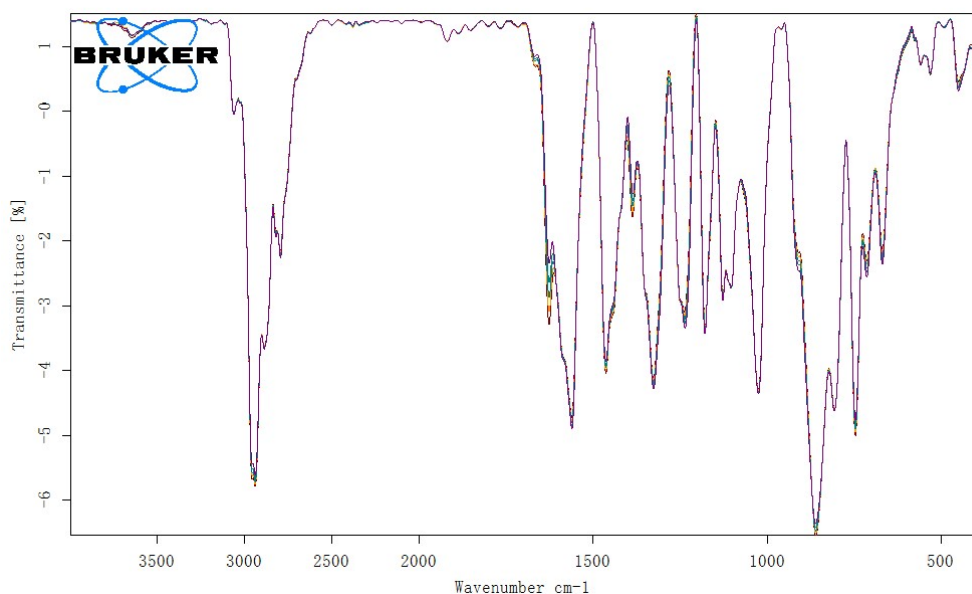

Fig. S101. IR spectrum of complexes **1a-1e**

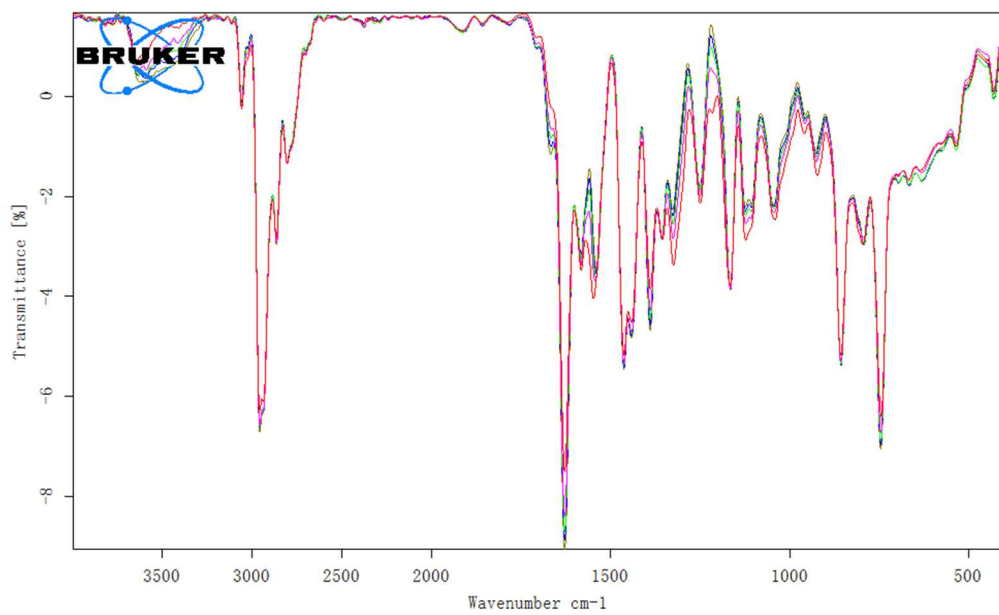

**Fig. S102.** IR spectrum of complexes **2a-2e**

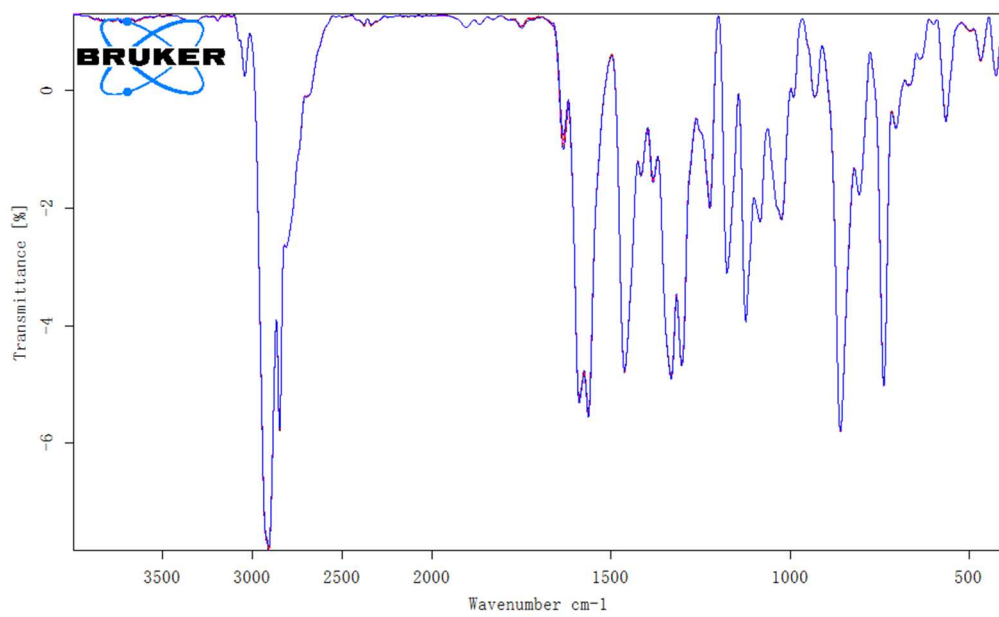

**Fig. S103.** IR spectrum of complexes **3a-3e**

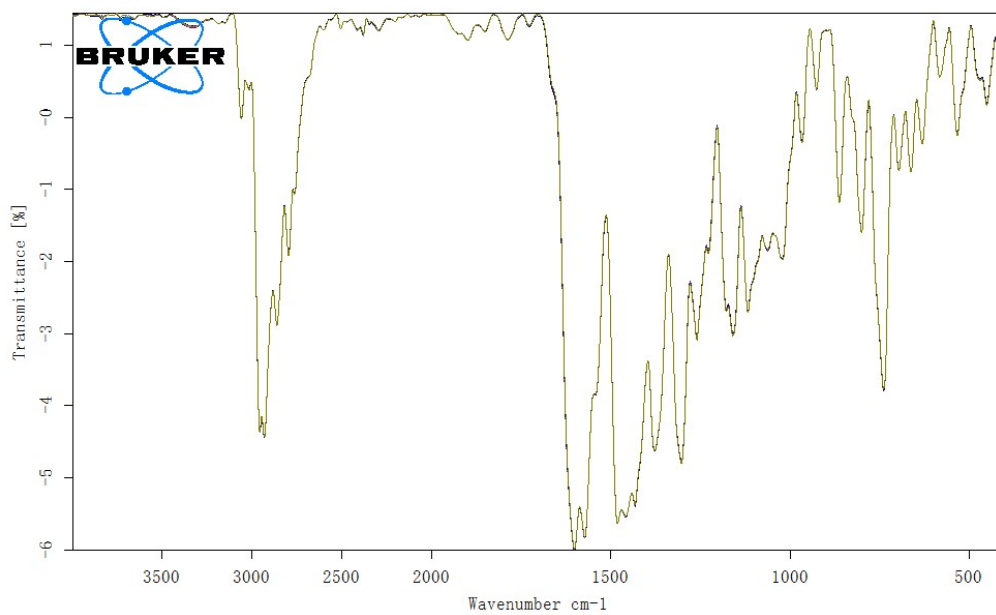

**Fig. S104.** IR spectrum of complexes **4a-4d**

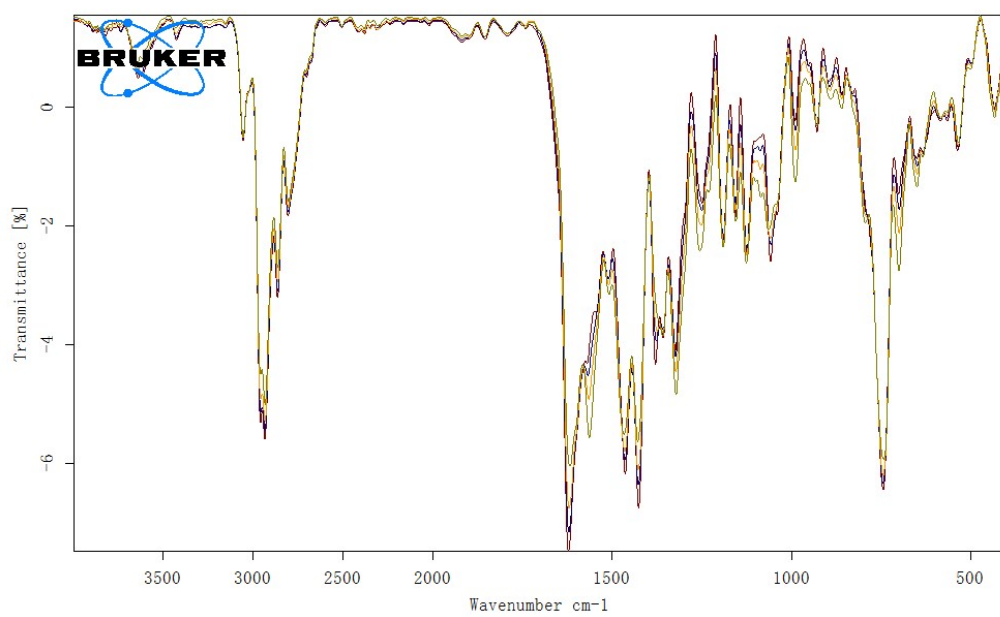

**Fig. S105.** IR spectrum of complexes **5a-5d**

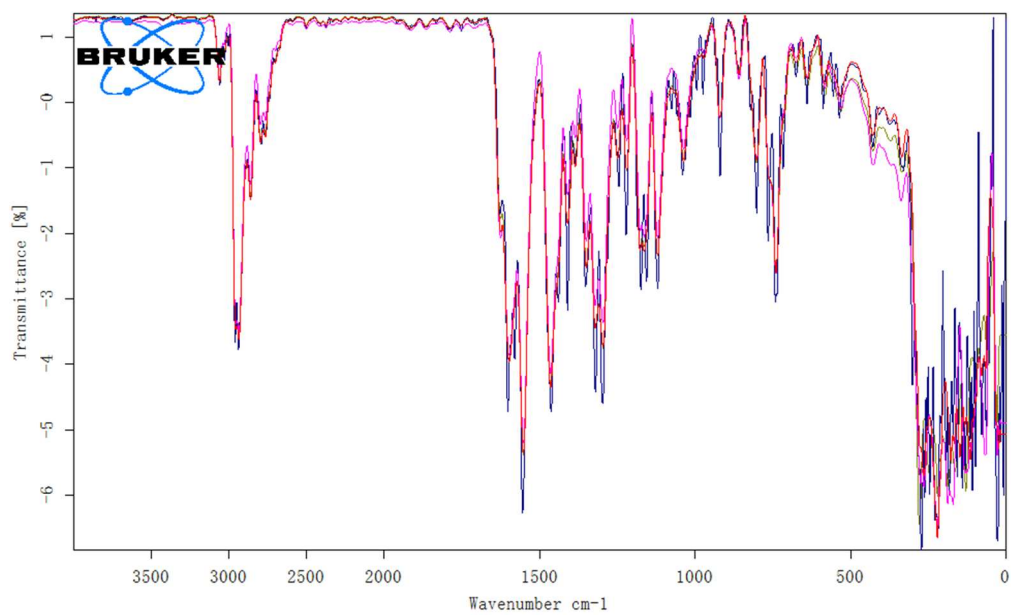

**Fig. S106.** IR spectrum of complexes **6a-6d**

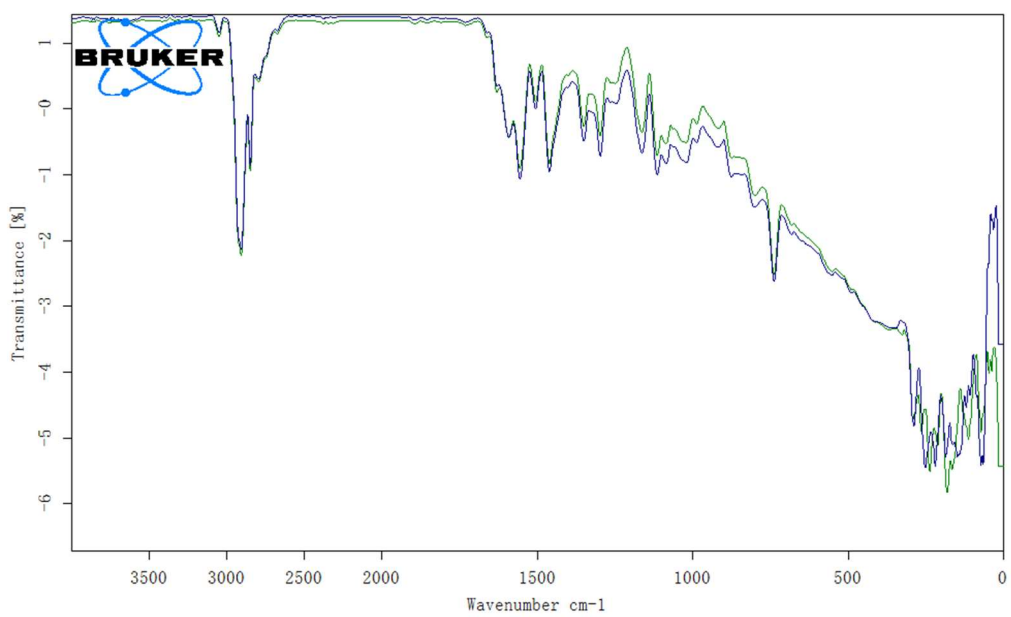

**Fig. S107.** IR spectrum of complexes **7a-7b**

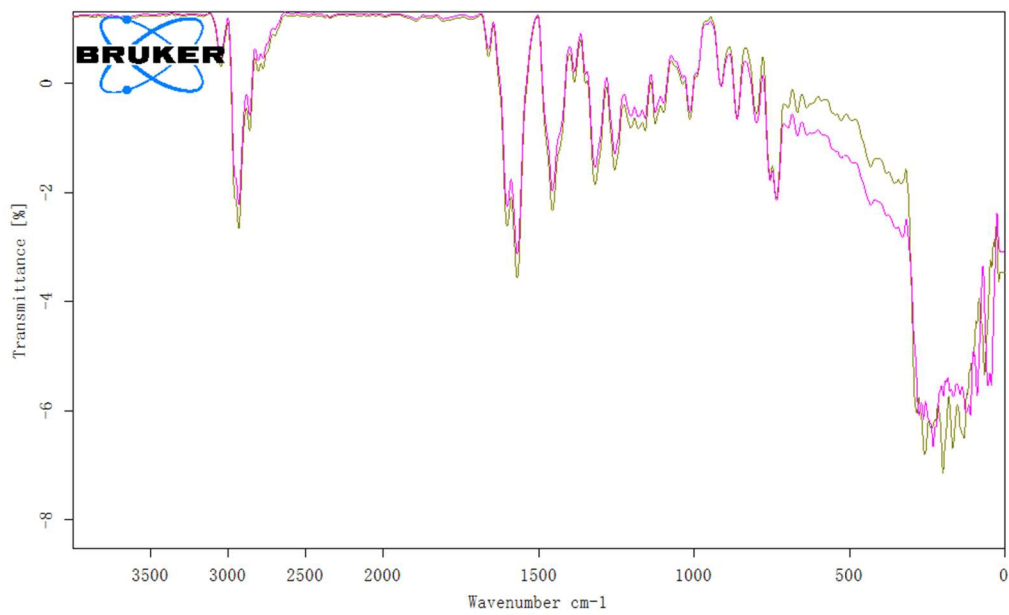

**Fig. S108.** IR spectrum of complexes **8a-8b**

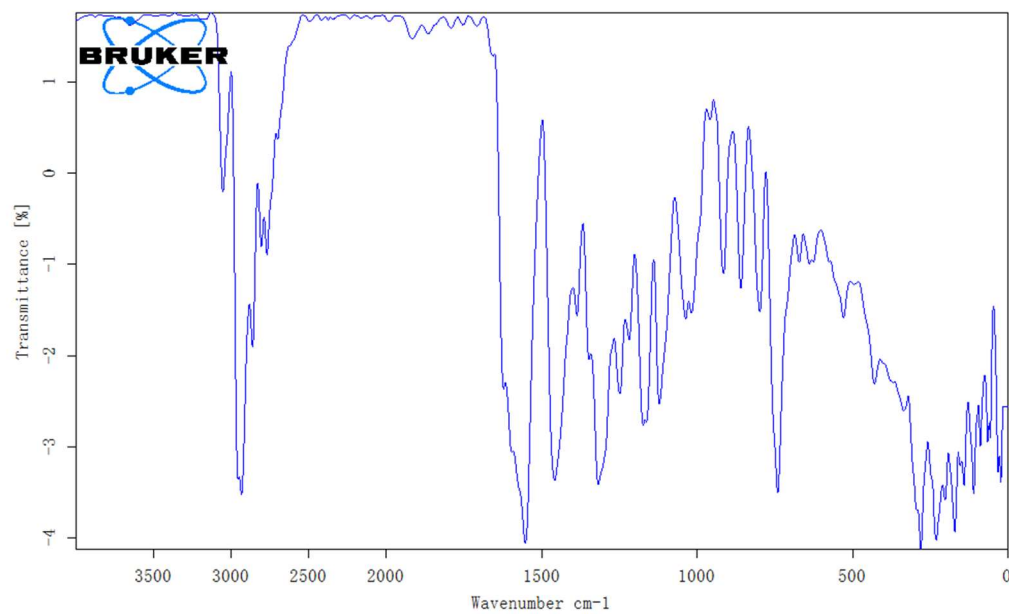

**Fig. S109.** IR spectrum of complex **9**



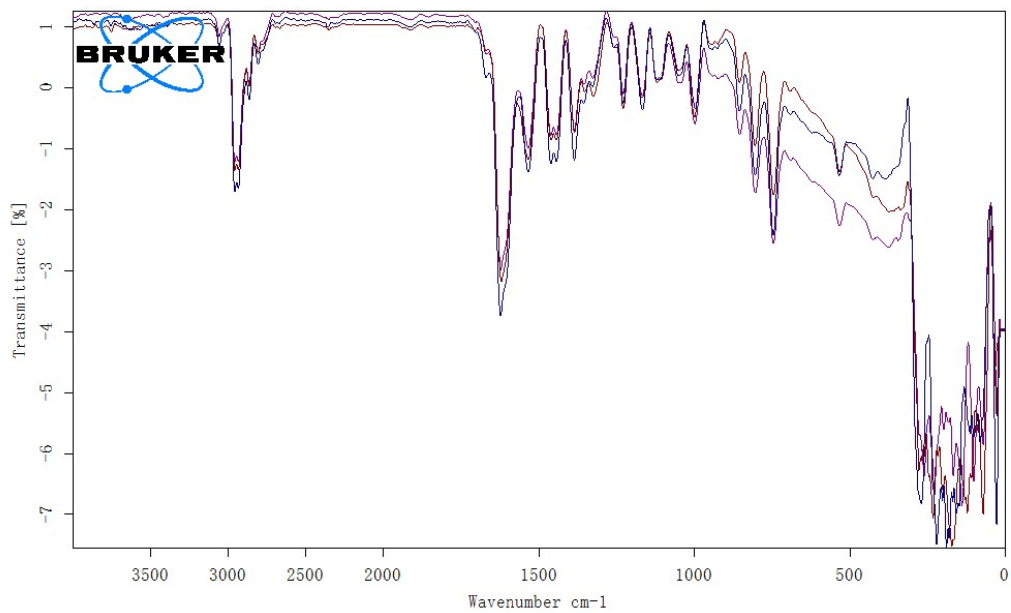

**Fig. S110.** IR spectrum of complexes **10a-10c**

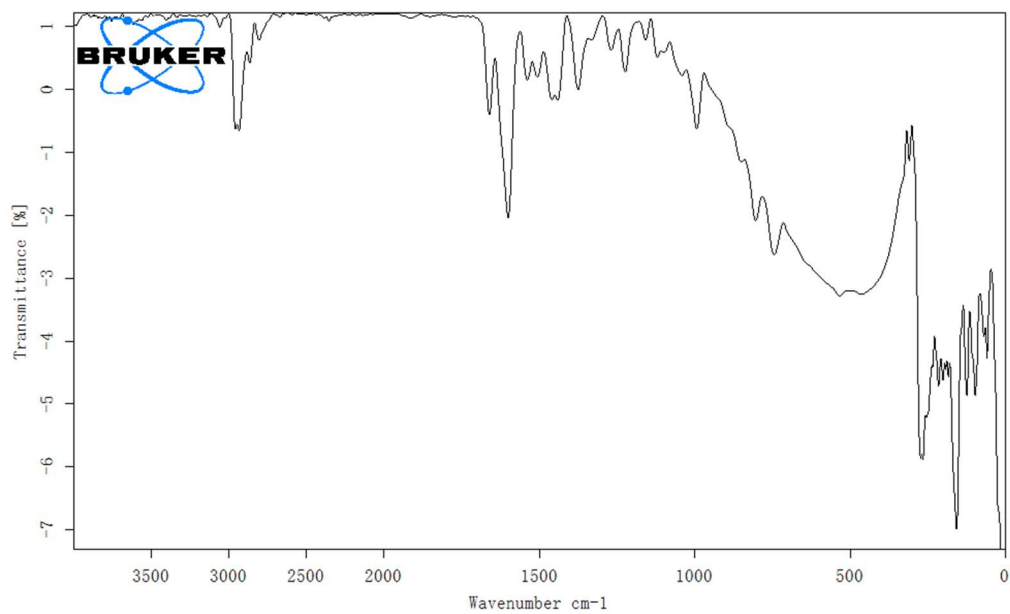

**Fig. S111.** IR spectrum of complex **11**

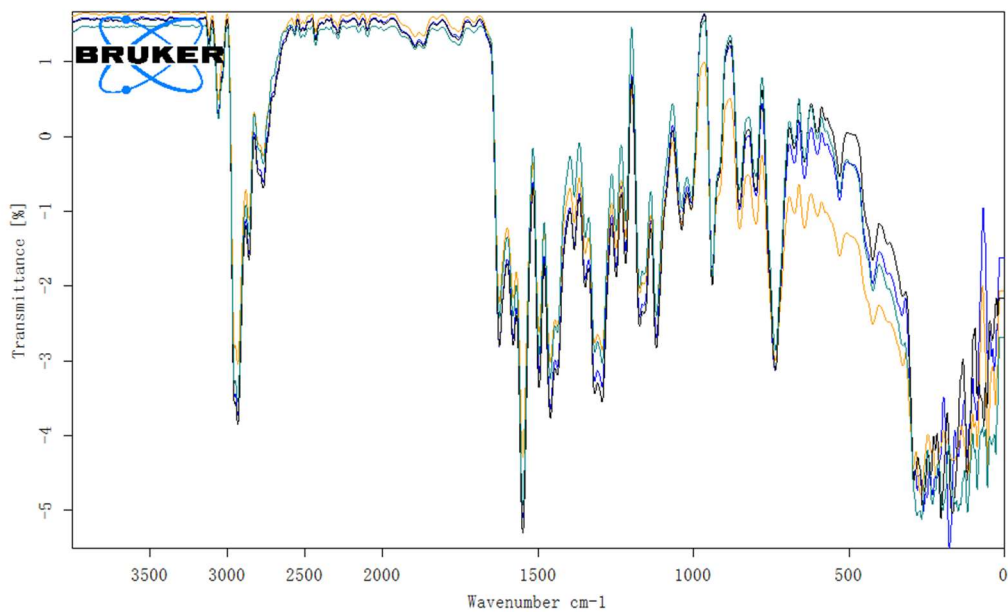

**Fig. S112.** IR spectrum of complexes **12a-12d**

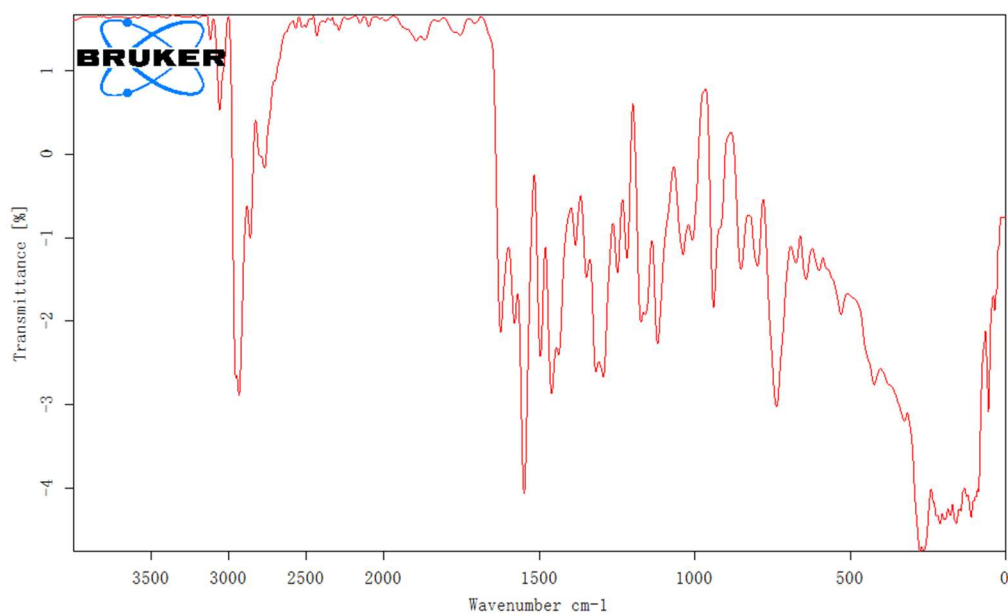

**Fig. S113.** IR spectrum of complex **13**

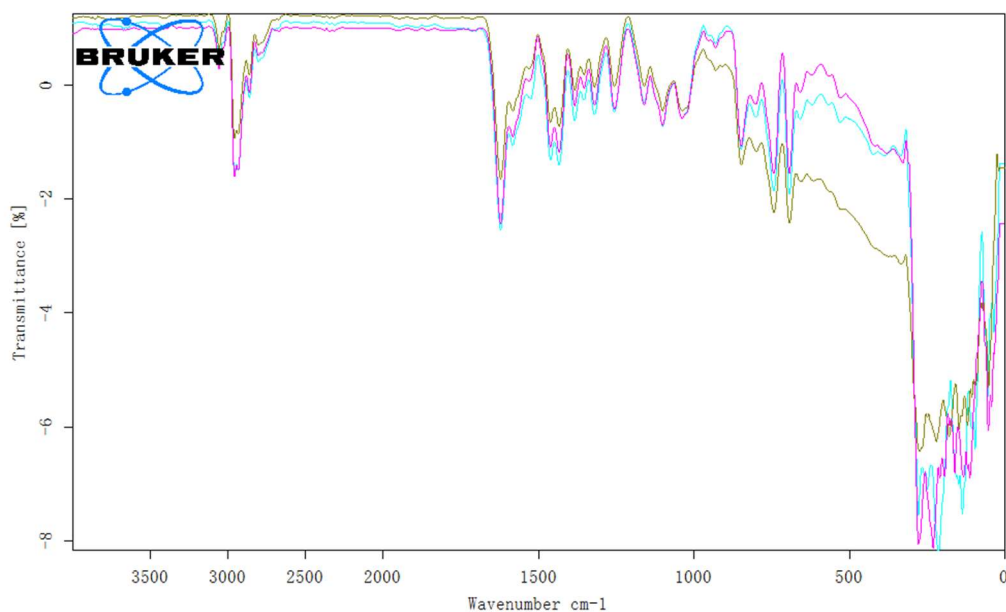

**Fig. S114.** IR spectrum of complexes **14a-14c**

## 10. References

1. (a) J. B. Reed, B. S. Hopkins and L. F. Audrieth, *Inorg. Synth.*, 1939, **1**, 28–33; (b) M. D. Taylor and C. P. Carter, *J. Inorg. Nucl. Chem.*, 1962, **24**, 387–391; (c) N. L. Edlema, A. C. Wang, J. A. Belot, A. W. Metz, J. R. Babcock, A. M. Kawaoka, J. Ni, M. V. Metz, C. J. Flaschenriem, C. L. Stern, L. M. Liable-Sands, A. L. Rheingold, P. R. Markworth, R. P. H. Chang, M. P. Chudzik, C. R. Kannewurf and T. J. Marks, *Inorg. Chem.*, 2002, **41**, 5005–5023.
2. (a) G. E. Hartwell and T. L. Brown, *J. Am. Chem. Soc.*, 1966, **88**, 4625–4629; (b) H. L. Lewi and T. L. Brown, *J. Am. Chem. Soc.*, 1970, **92**, 4664–4670; (c) C. Tessier-Youngs and O. T. Beachley, Jr., *Inorg. Synth.*, 1986, **24**, 95–97; (d) G. D. Vaughn, K. A. Krein and J. A. Gladysz, *Organometallics*, 1986, **5**, 936–942.
3. (a) M. F. Lappert and R. Pearce, *J. Chem. Soc. Chem. Comm.*, 1973, **126**; (b) K. C. Hultsch, P. Voth, K. Beckerle, T. P. Spaniol and J. Okuda, *Organometallics*, 2000, **19**, 228–243; (c) W. J. Evans, J. C. Brady and J. W. Ziller, *J. Am. Chem. Soc.*, 2001, **123**, 7711–7712; (d) H. Schumann, D. M. M. Freckmann and S. Dechert, *Z. Anorg. Allorg. Chem.*, 2002, **628**, 2422–2426; (e) S. Arndt, T. P. Spaniol and J. Okuda, *Angew. Chem., Int. Ed.*, 2003, **42**, 5075–5079; (f) F. Estler, G. Eickerling, E. Herdtweck and R. Anwander, *Organometallics*, 2003, **22**, 1212–1222; (g) S. M. Chen, Y. Q. Zhang, J. Xiong, B. W. Wang and S. Gao, *Inorg. Chem.*, 2020, **59**, 5835–5844.
4. *SMART Software Users Guide*, Version 4.21; Bruker AXS, Inc.: Madison, WI, 1997.
5. Bruker (2015). *SAINTE* (Version 8.37A). Bruker AXS Inc., Madison, Wisconsin, USA.
6. Bruker (2016). *SADABS-2016/2*. Bruker AXS Inc., Madison, Wisconsin, USA.
7. Sheldrick GM. *Acta Cryst*, 2015, A71: 3–8.
8. Dolomanov OV, Bourhis LJ, Gildea RJ, Howard JAK, Puschmann H. *J Appl Cryst*, 2009, 42: 339–341.
9. L. Guo, X. Zhu, G. Zhang, Y. Wei, L. Ning, S. Zhou, Z. Feng, S. Wang, X. Mu, J. Chen and Y. Jiang, *Inorg. Chem.*, 2015, **54**, 5725–5731.

10. W. Wu, T. Rajeshkumar, D. Hong, S. Zhu, Z. Huang, F. Chai, W. Wang, Q. Yuan, Y. Wei, Z. Xie, L. Maron, S. Wang, *Inorg. Chem.*, 2024, **63**, 18365–18378.
11. (a) A. D. Becke, *J. Chem. Phys.*, 1993, **98**, 5648–5652; (b) K. Burke, J. P. Perdew and W. Yang in *Electronic Density Functional Theory: Recent Progress and New Directions*, Eds: J. F. Dobson, G. Vignale and M. P. Das, Plenum. New York, 1998.
12. (a) A. Moritz, X. Cao and M. Dolg, *Theor. Chem. Acc.* 2007, **118**, 845; (b) A. Hollwarth, M. Bohme, S. Dapprich, A.W. Ehlers, A. Gobbi, V. Jonas, K.F. Kohler, R. Stegmann, A. Veldkamp, G. Frenking. *J. Chem. Phys.* 1993, **208**, 237.
13. (a) P. C. Hariharan and J. A. Pople, *Theoret. Chim. Acta.*, 1973, **28**, 213–222; (b) W. J. Hehre, R. Ditchfield and J. A. Pople, *J. Chem. Phys.*, 1972, **56**, 2257–2261.
14. Gaussian 16. Revision D0. M. J. Frisch, G. W. Trucks, H. B. Schlegel, G. E. Scuseria, M. A. Robb, J. R. Cheeseman, G. Scalmani, V. Barone, B. Mennucci, G. A. Petersson, H. Nakatsuji, M. Caricato, X. Li, H. P. Hratchian, A. F. Izmaylov, J. Bloino, G. Zheng, J. L. Sonnenberg, M. Hada, M. Ehara, K. Toyota, R. Fukuda, J. Hasegawa, M. Ishida, T. Nakajima, Y. Honda, O. Kitao, H. Nakai, T. Vreven, J. A. Jr. Montgomery, J. E. Peralta, F. Ogliaro, M. Bearpark, E. Heyd, J. J. Brothers, K. N. Kudin, V. N. Staroverov, R. Kobayashi, J. Normand, K. Raghavachari, J. C. Burant, S. Iyengar, J. Tomasi, M. Cossi, N. Rega, M. J. Millam, M. Klene, J. E. Knox, J. B. Cross, V. Bakken, C. Adamo, J. Jaramillo, R. Gomperts, R. E. Stratmann, O. Yazyev, A. J. Austin, R. Cammi, C. Pomelli, J. W. Ochterski, R. L. Martin, K. Morokuma, V. G. Zakrzewski, G. A. Voth, P. Salvador, J. J. Dannenberg, S. Dapprich, A. D. Daniels, O. Farkas, J. B. Foresman, J. V. Ortiz, J. Cioslowski and D. J. Fox, Gaussian Inc., 2016, Wallingford CT.
